# Supplementary material
Source: PubMed Central journal article supplement (PMC5949814)

$^1\text{H}$  NMR (600 MHz, DMSO)  $\delta$  7.96 (d,  $J = 1.9$  Hz, 1H), 7.38 (dd,  $J = 8.8, 1.9$  Hz, 1H), 6.90 (d,  $J = 8.9$  Hz, 1H).

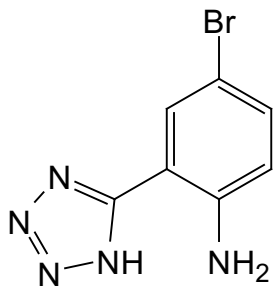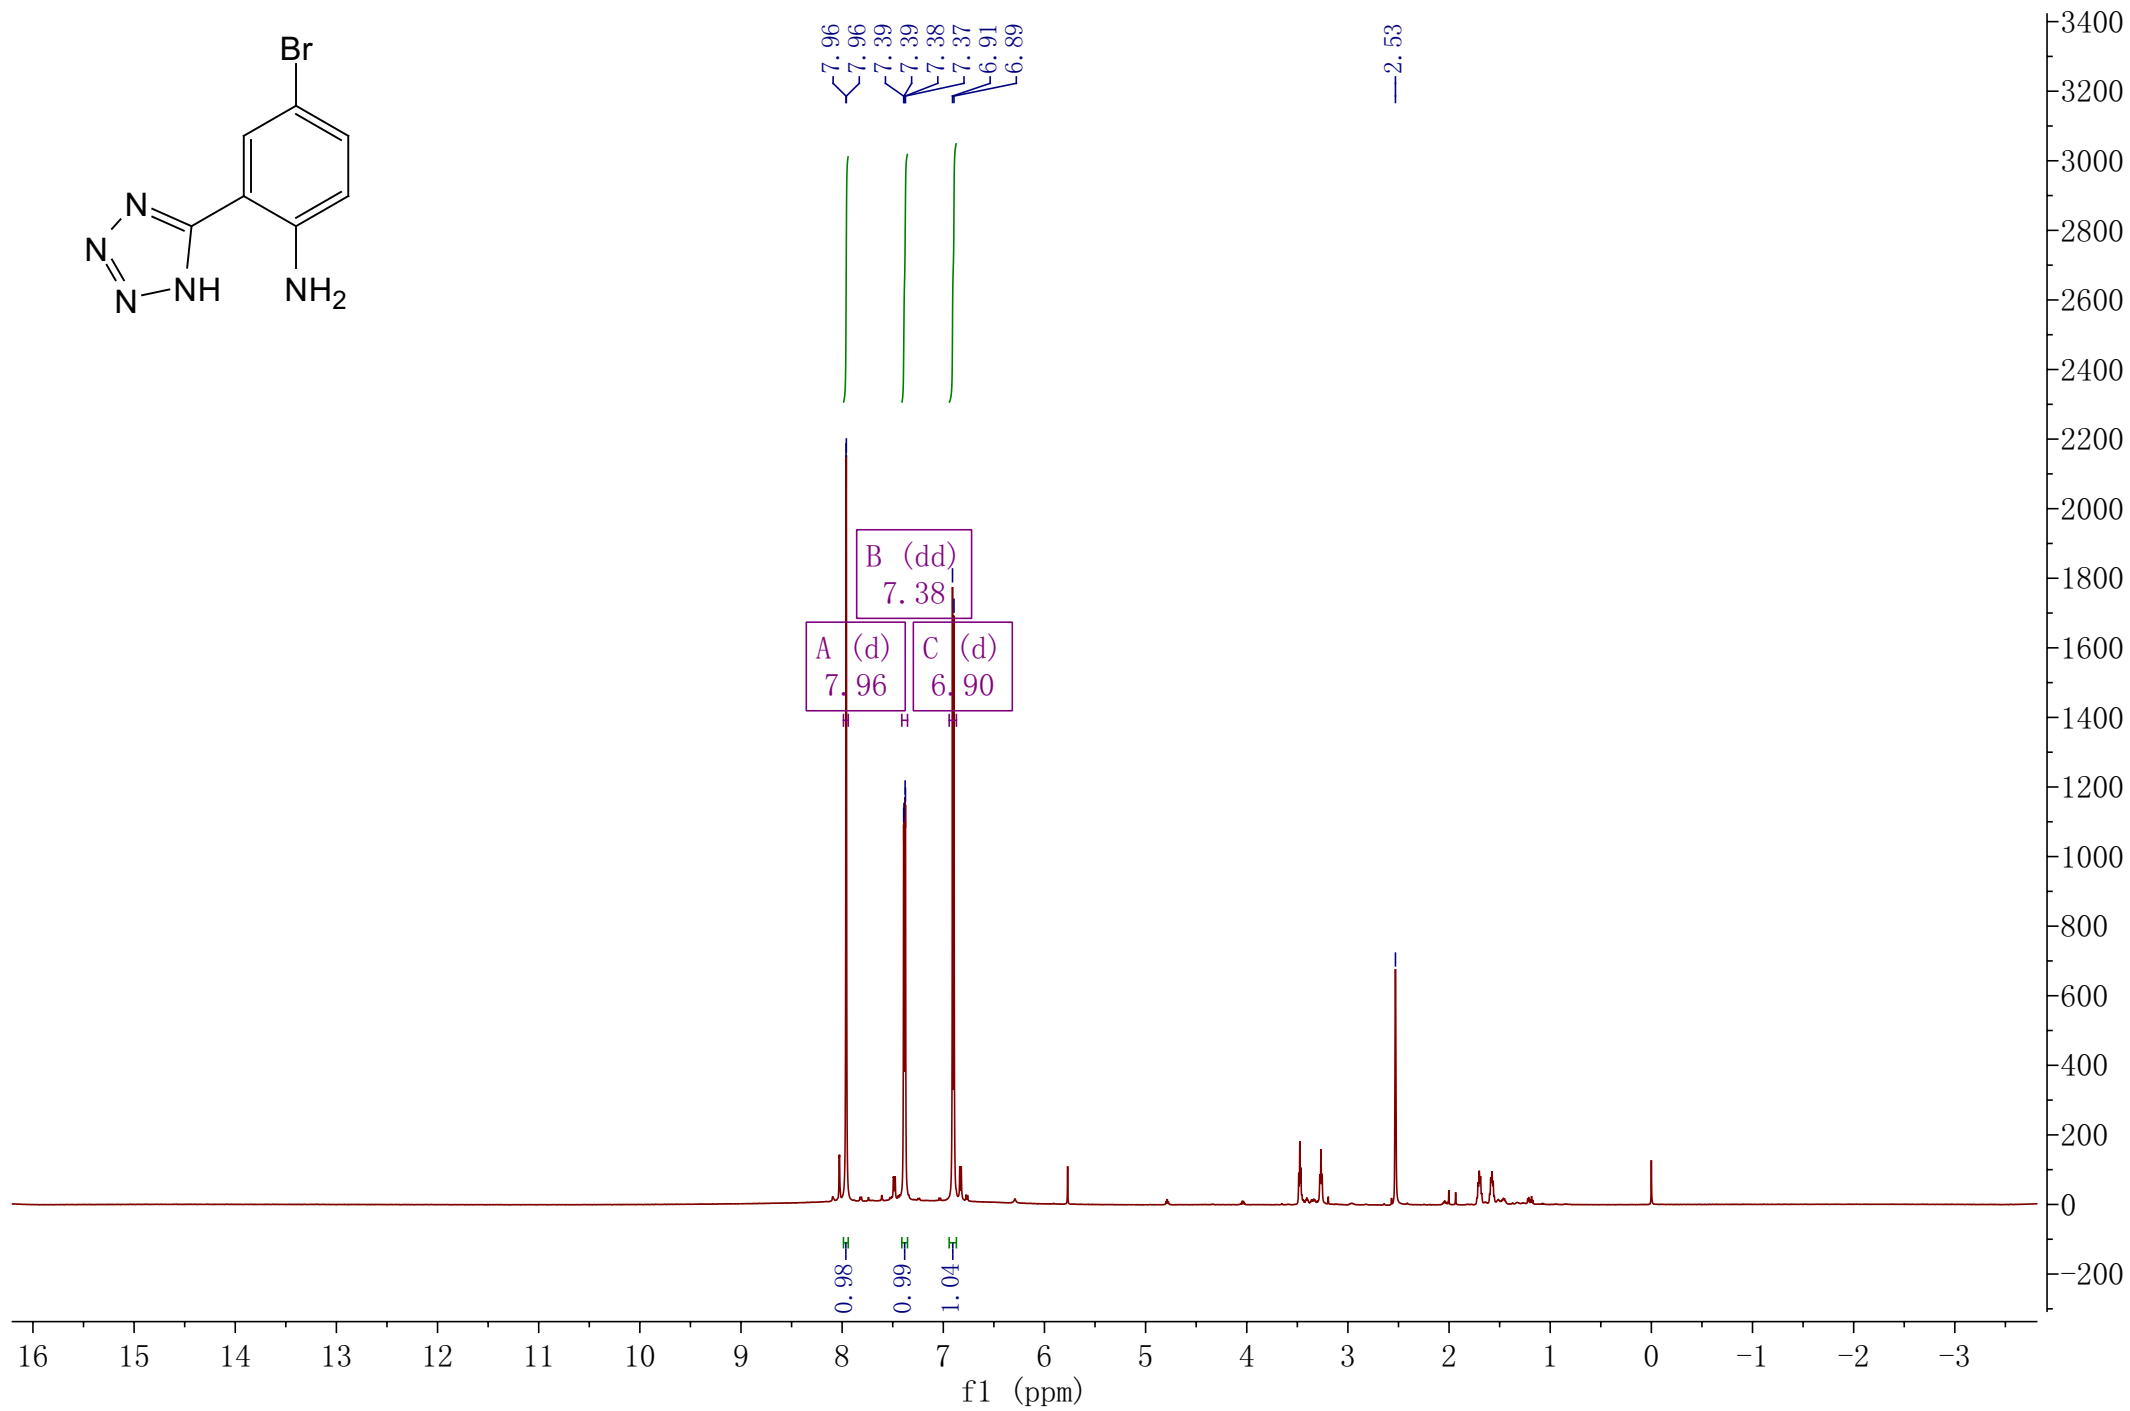

$^{13}\text{C}$  NMR (151 MHz, DMSO)  $\delta$  154.57, 147.09, 134.59, 130.39, 118.90, 106.96, 106.19.

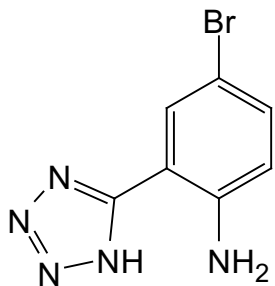

— 154.57  
— 147.09  
— 134.59  
— 130.39  
— 118.90  
— 106.96  
— 106.19

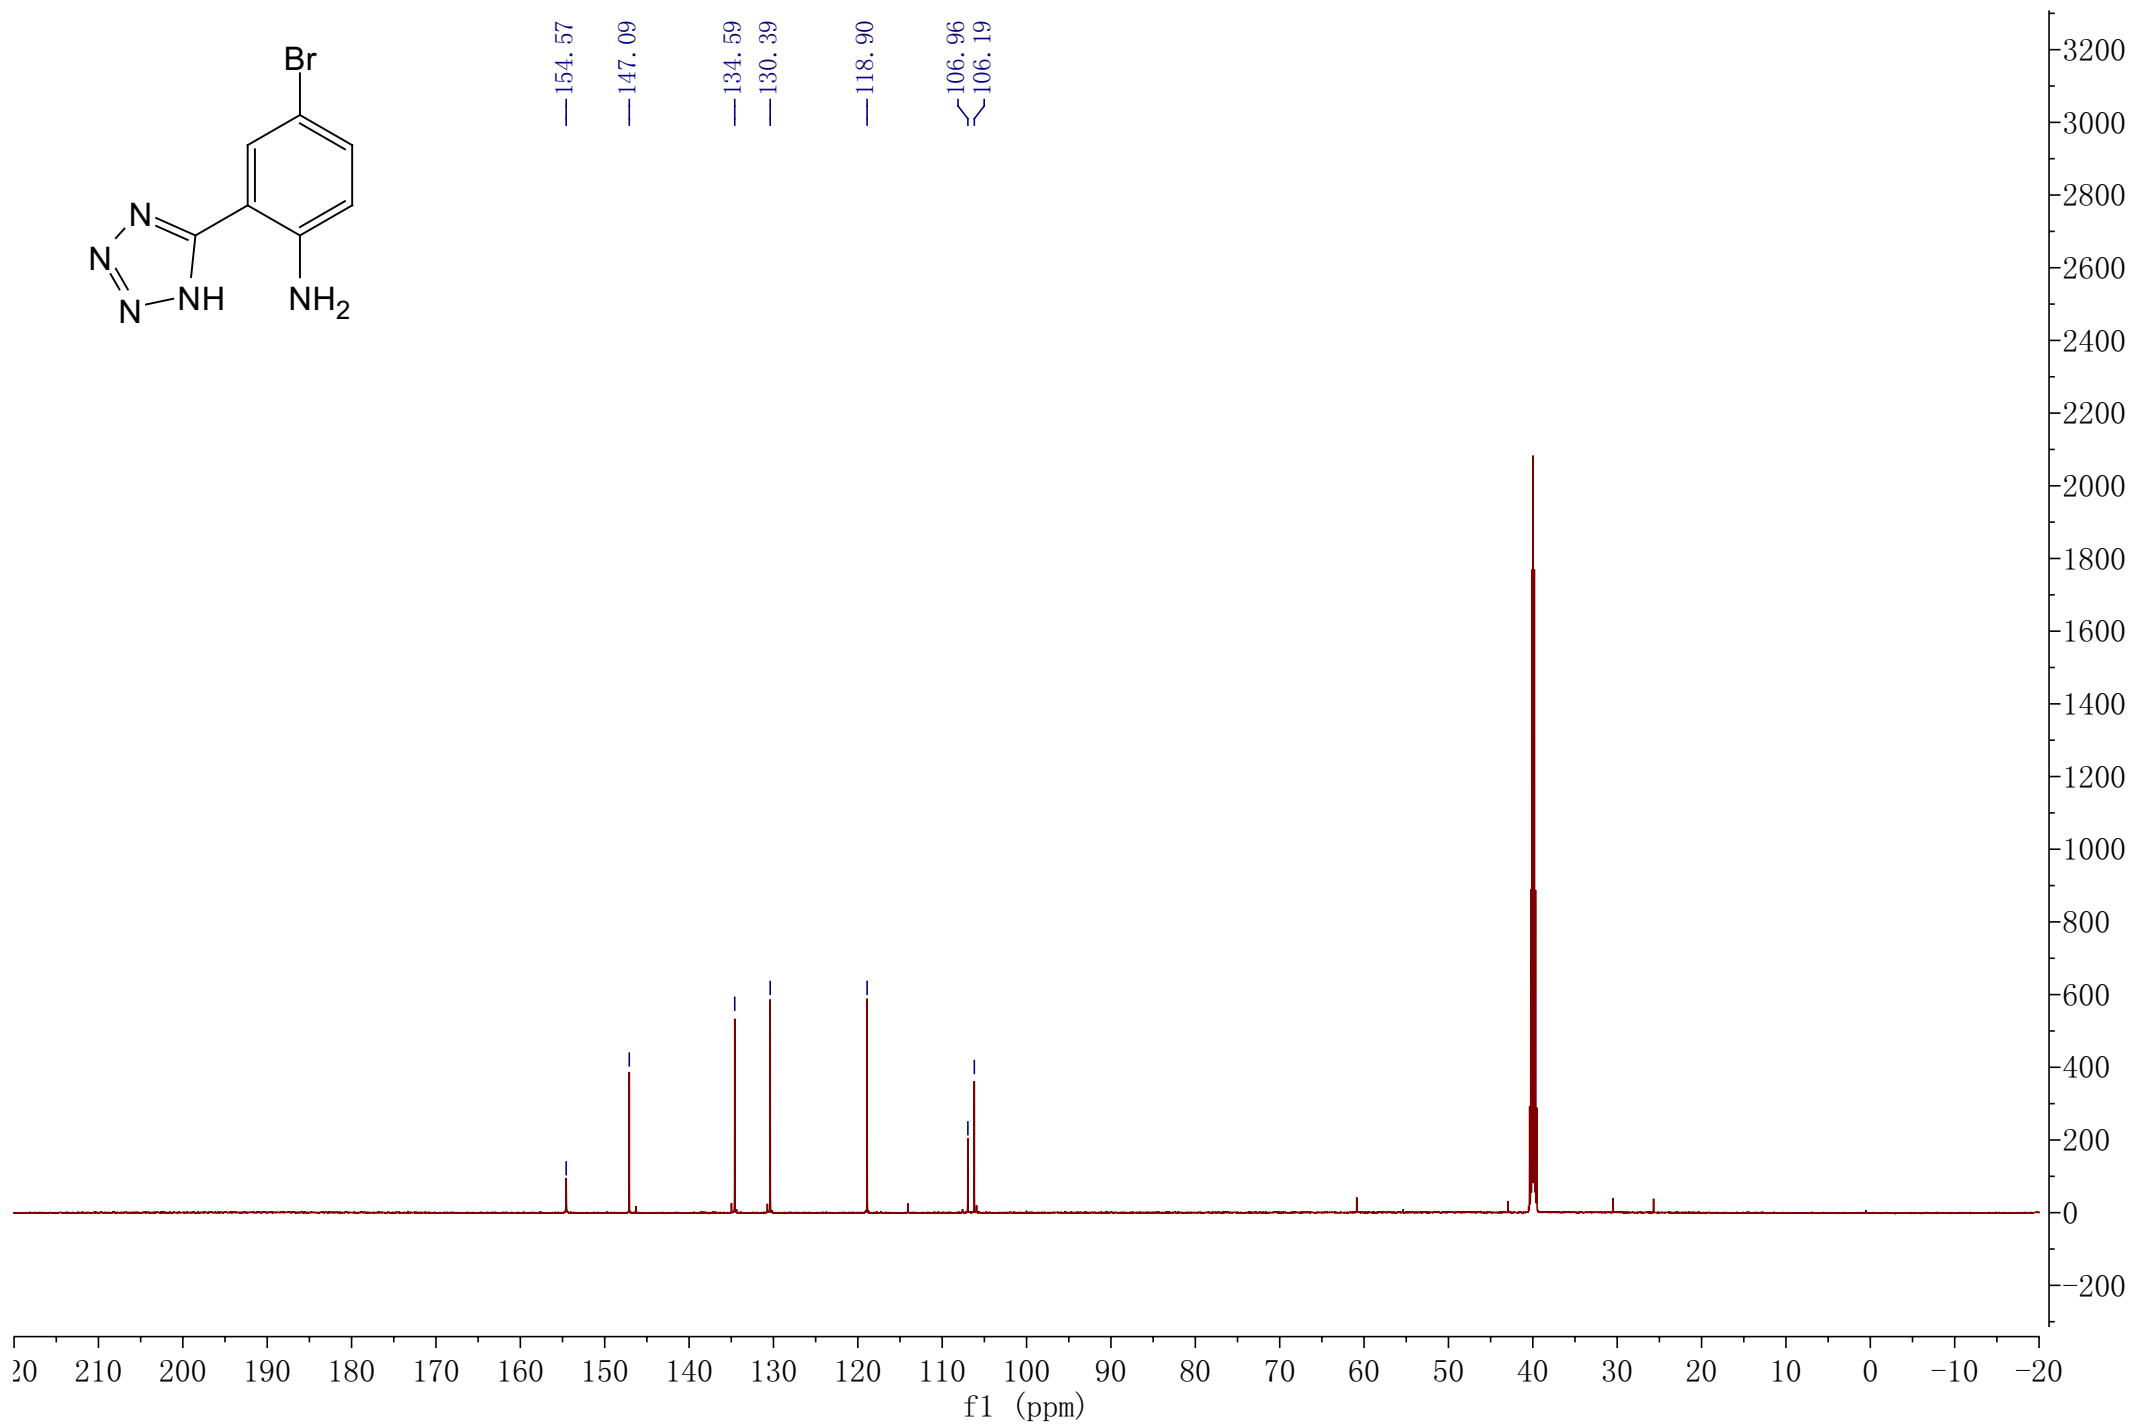

$^1\text{H}$  NMR (600 MHz, DMSO)  $\delta$  7.84 (d,  $J = 8.4$  Hz, 1H), 7.17 (d,  $J = 1.9$  Hz, 1H), 6.87 (dd,  $J = 8.4, 1.9$  Hz, 1H).

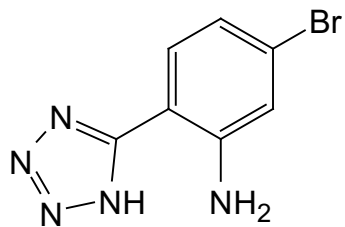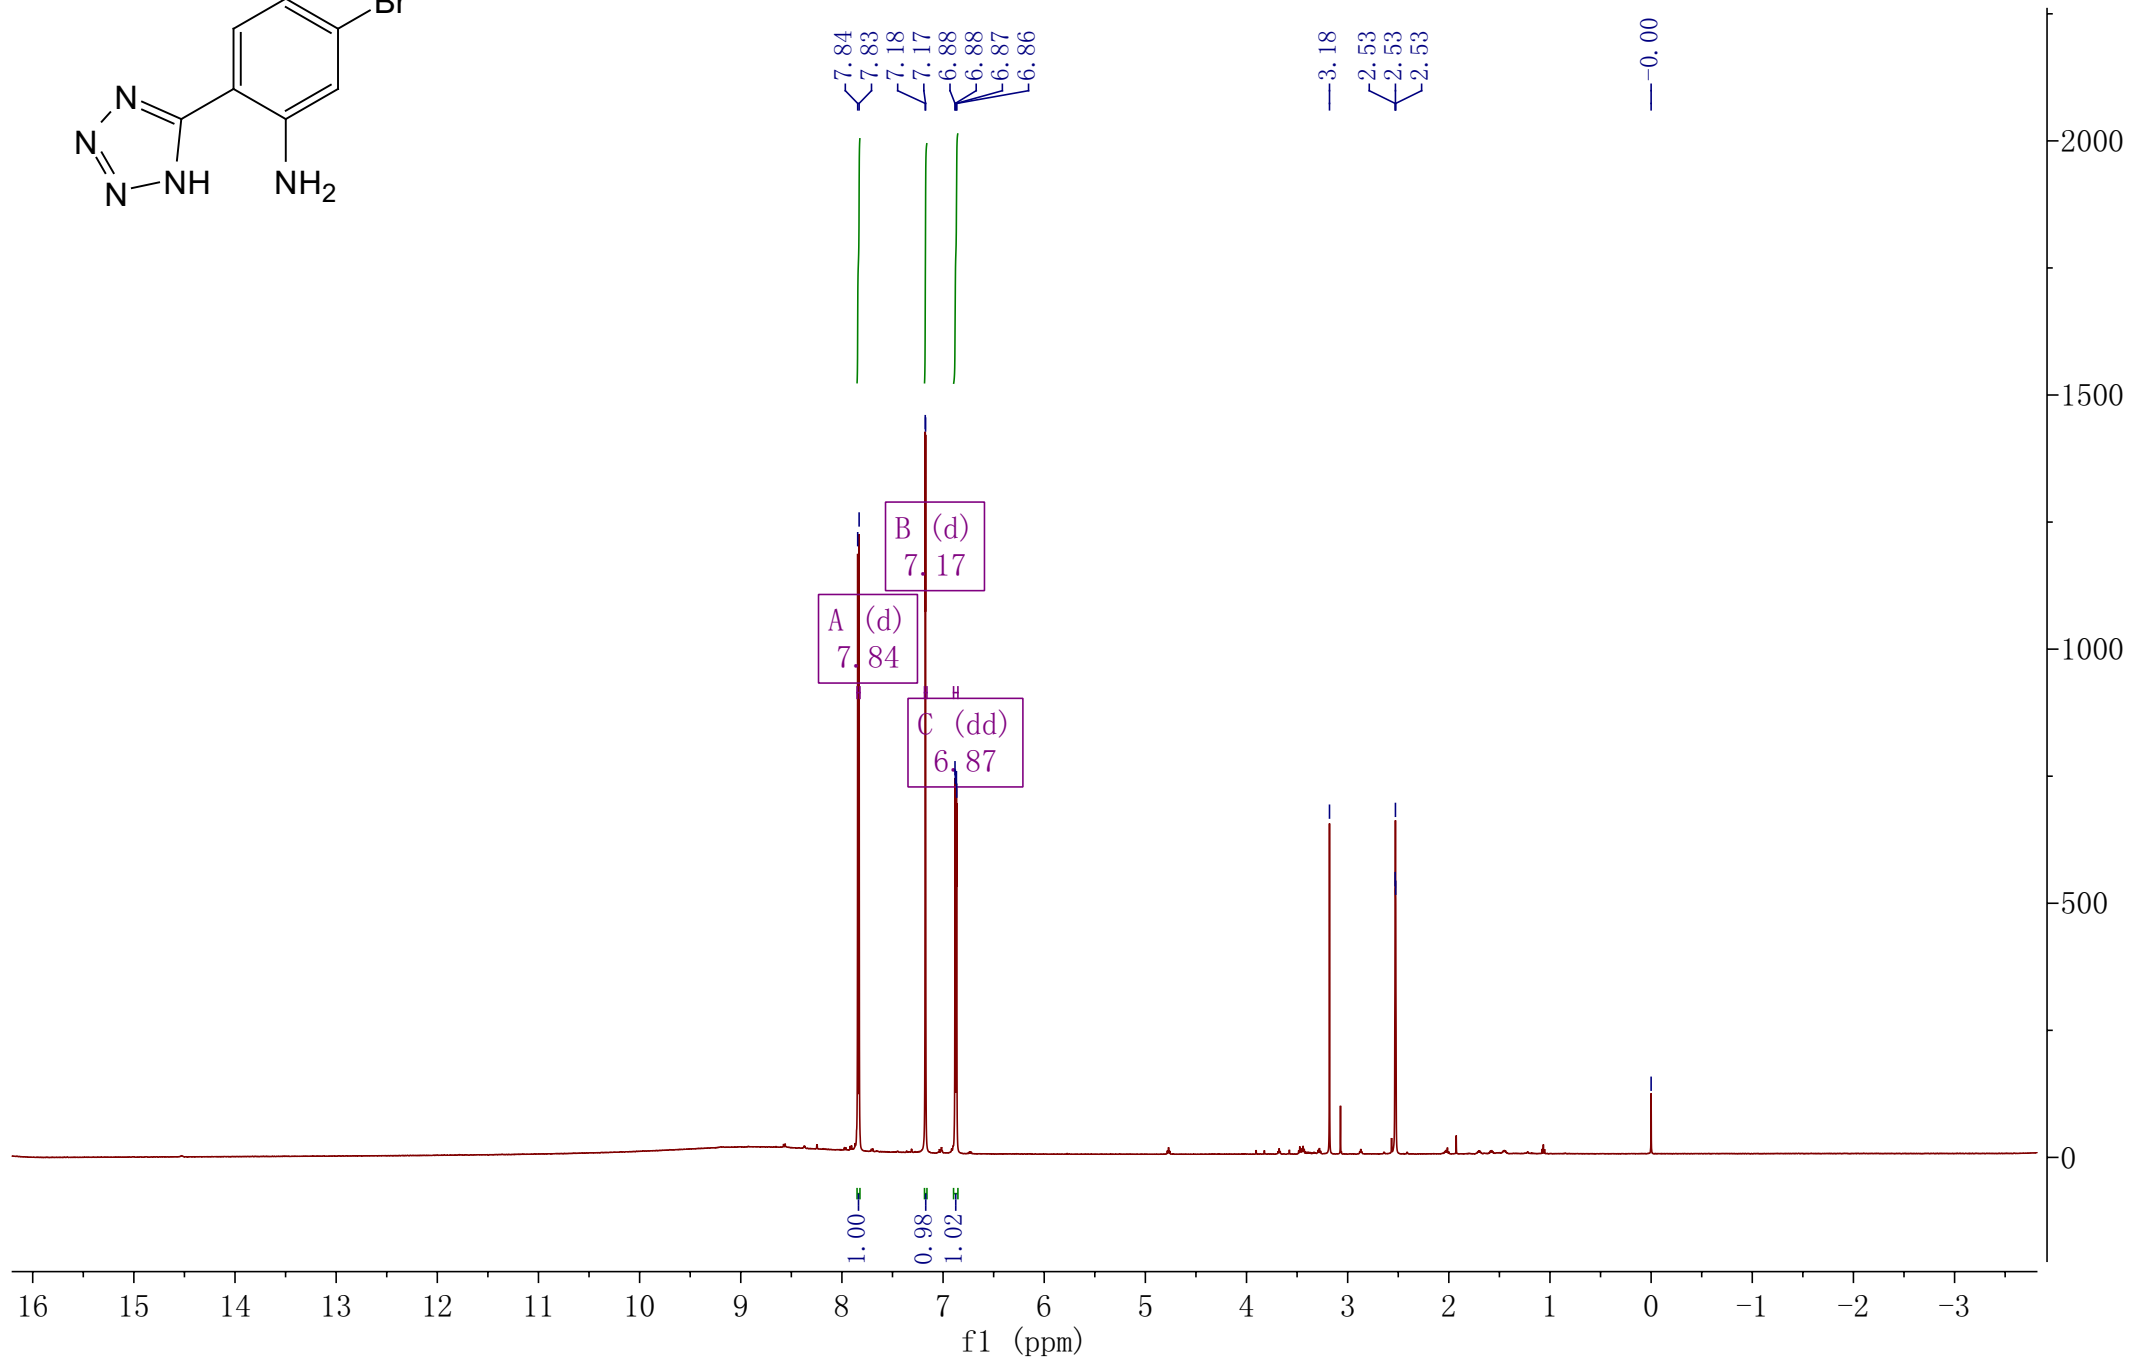

$^{13}\text{C}$  NMR (151 MHz, DMSO)  $\delta$  153.77, 147.72, 129.58, 124.53, 117.81, 117.74, 103.79.

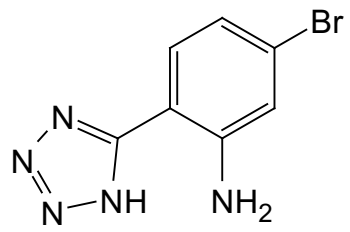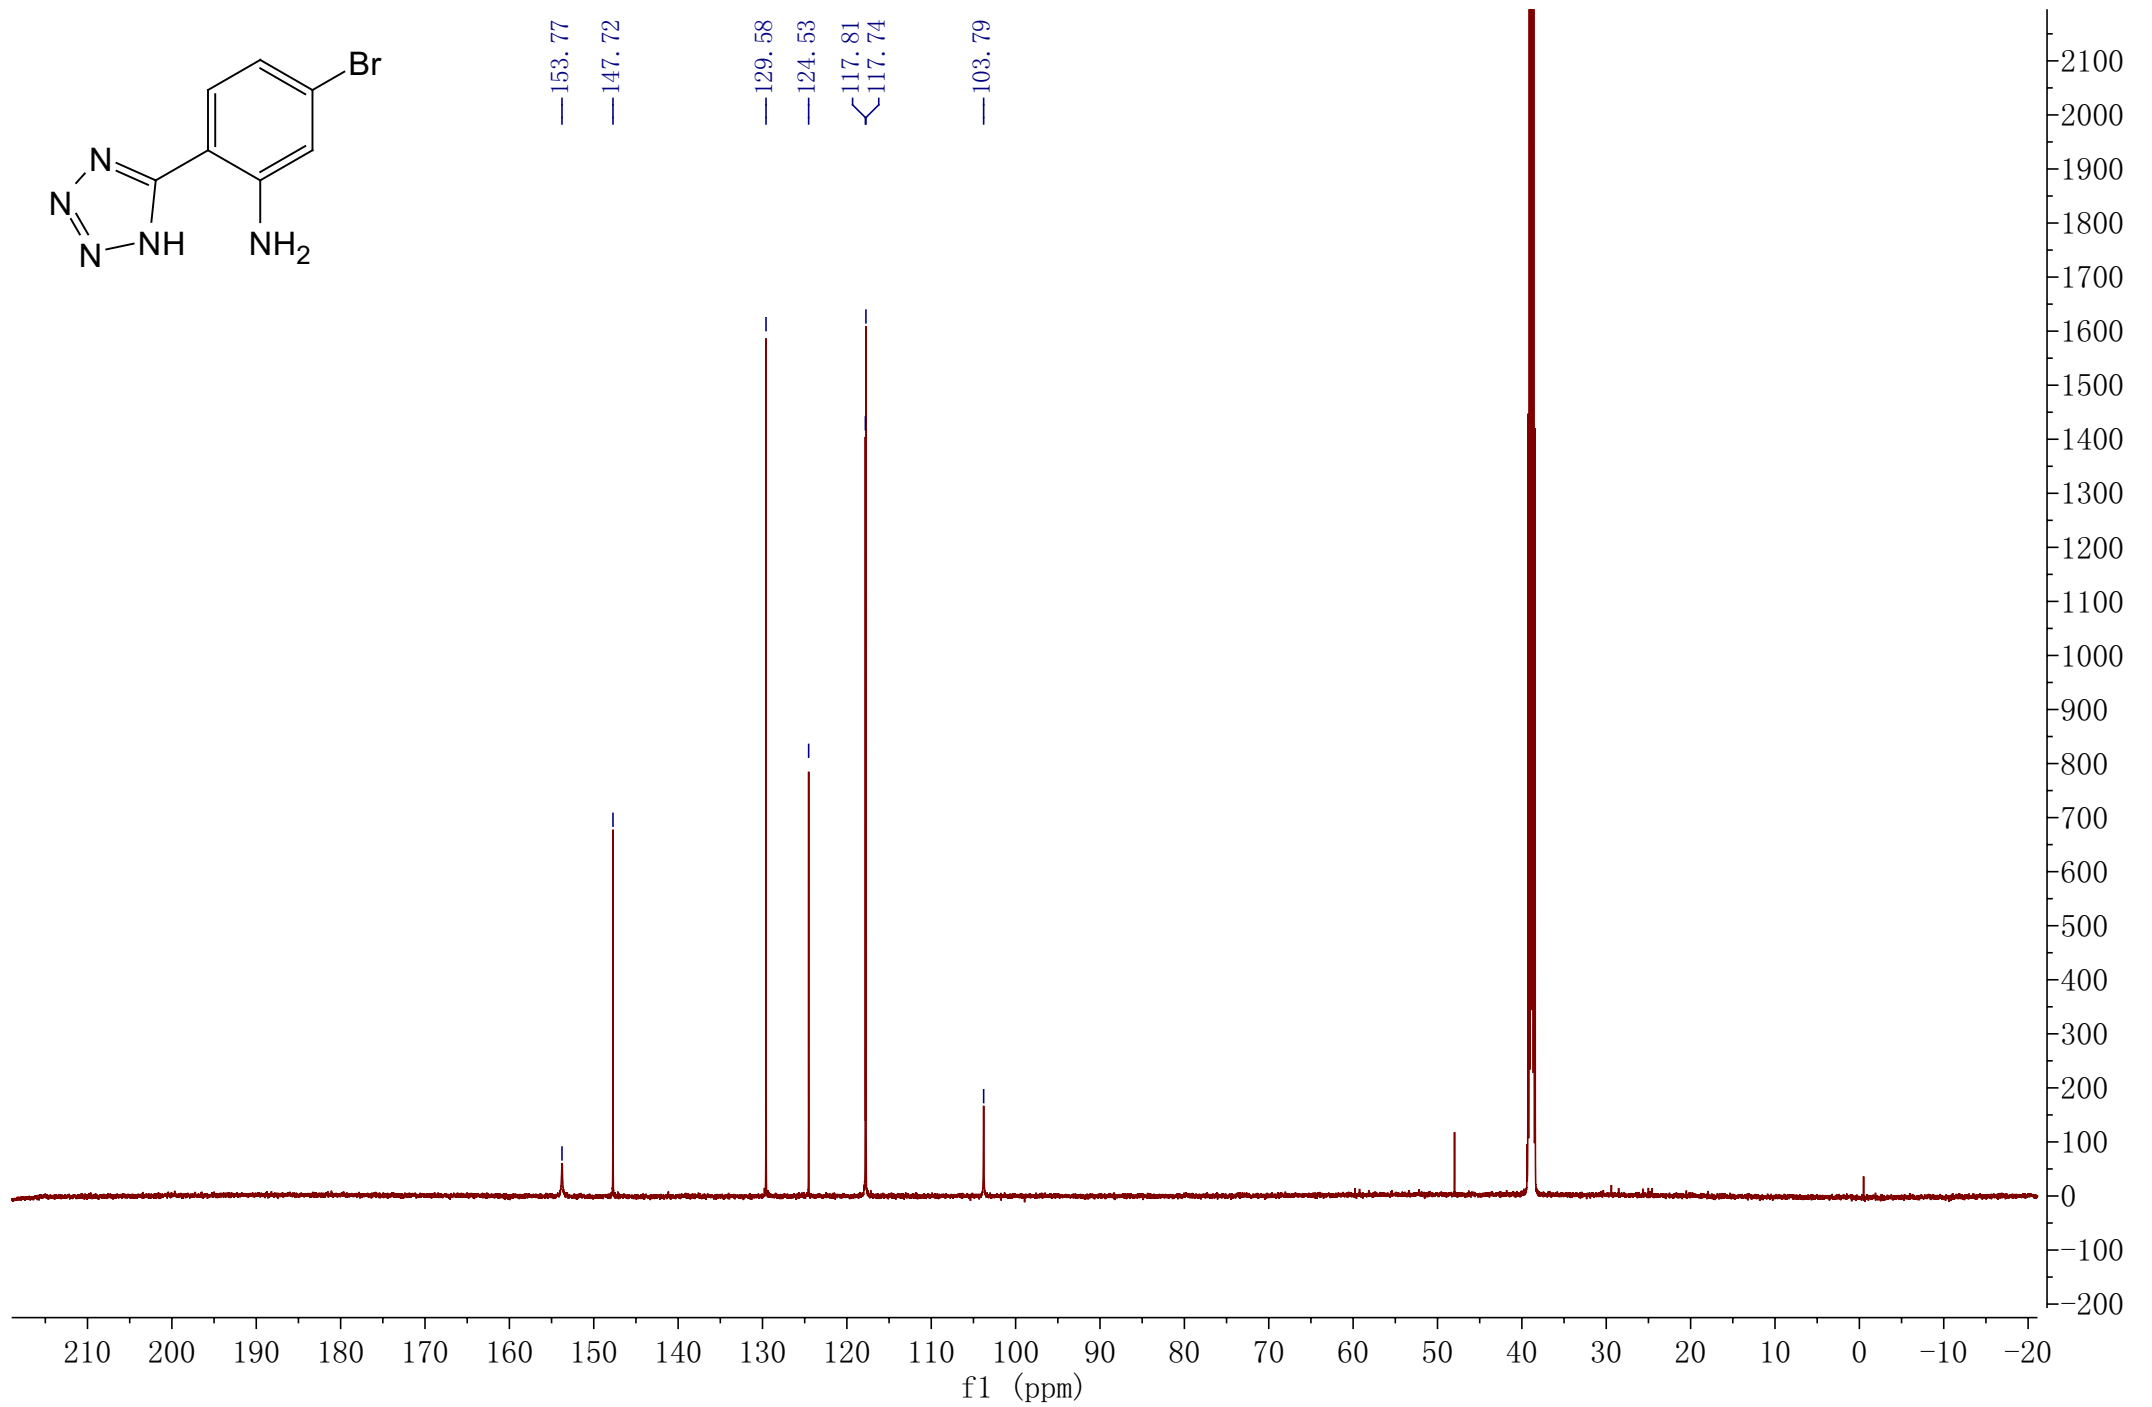

$^1\text{H}$  NMR (600 MHz, DMSO)  $\delta$  10.72 (s, 1H), 8.63 (d,  $J = 2.0$  Hz, 1H), 7.86 (d,  $J = 8.4$  Hz, 1H), 7.52 (dd,  $J = 8.4, 2.0$  Hz, 1H), 2.45 (dt,  $J = 7.5, 5.5$  Hz, 2H), 1.14 (dd,  $J = 9.8, 5.2$  Hz, 3H).

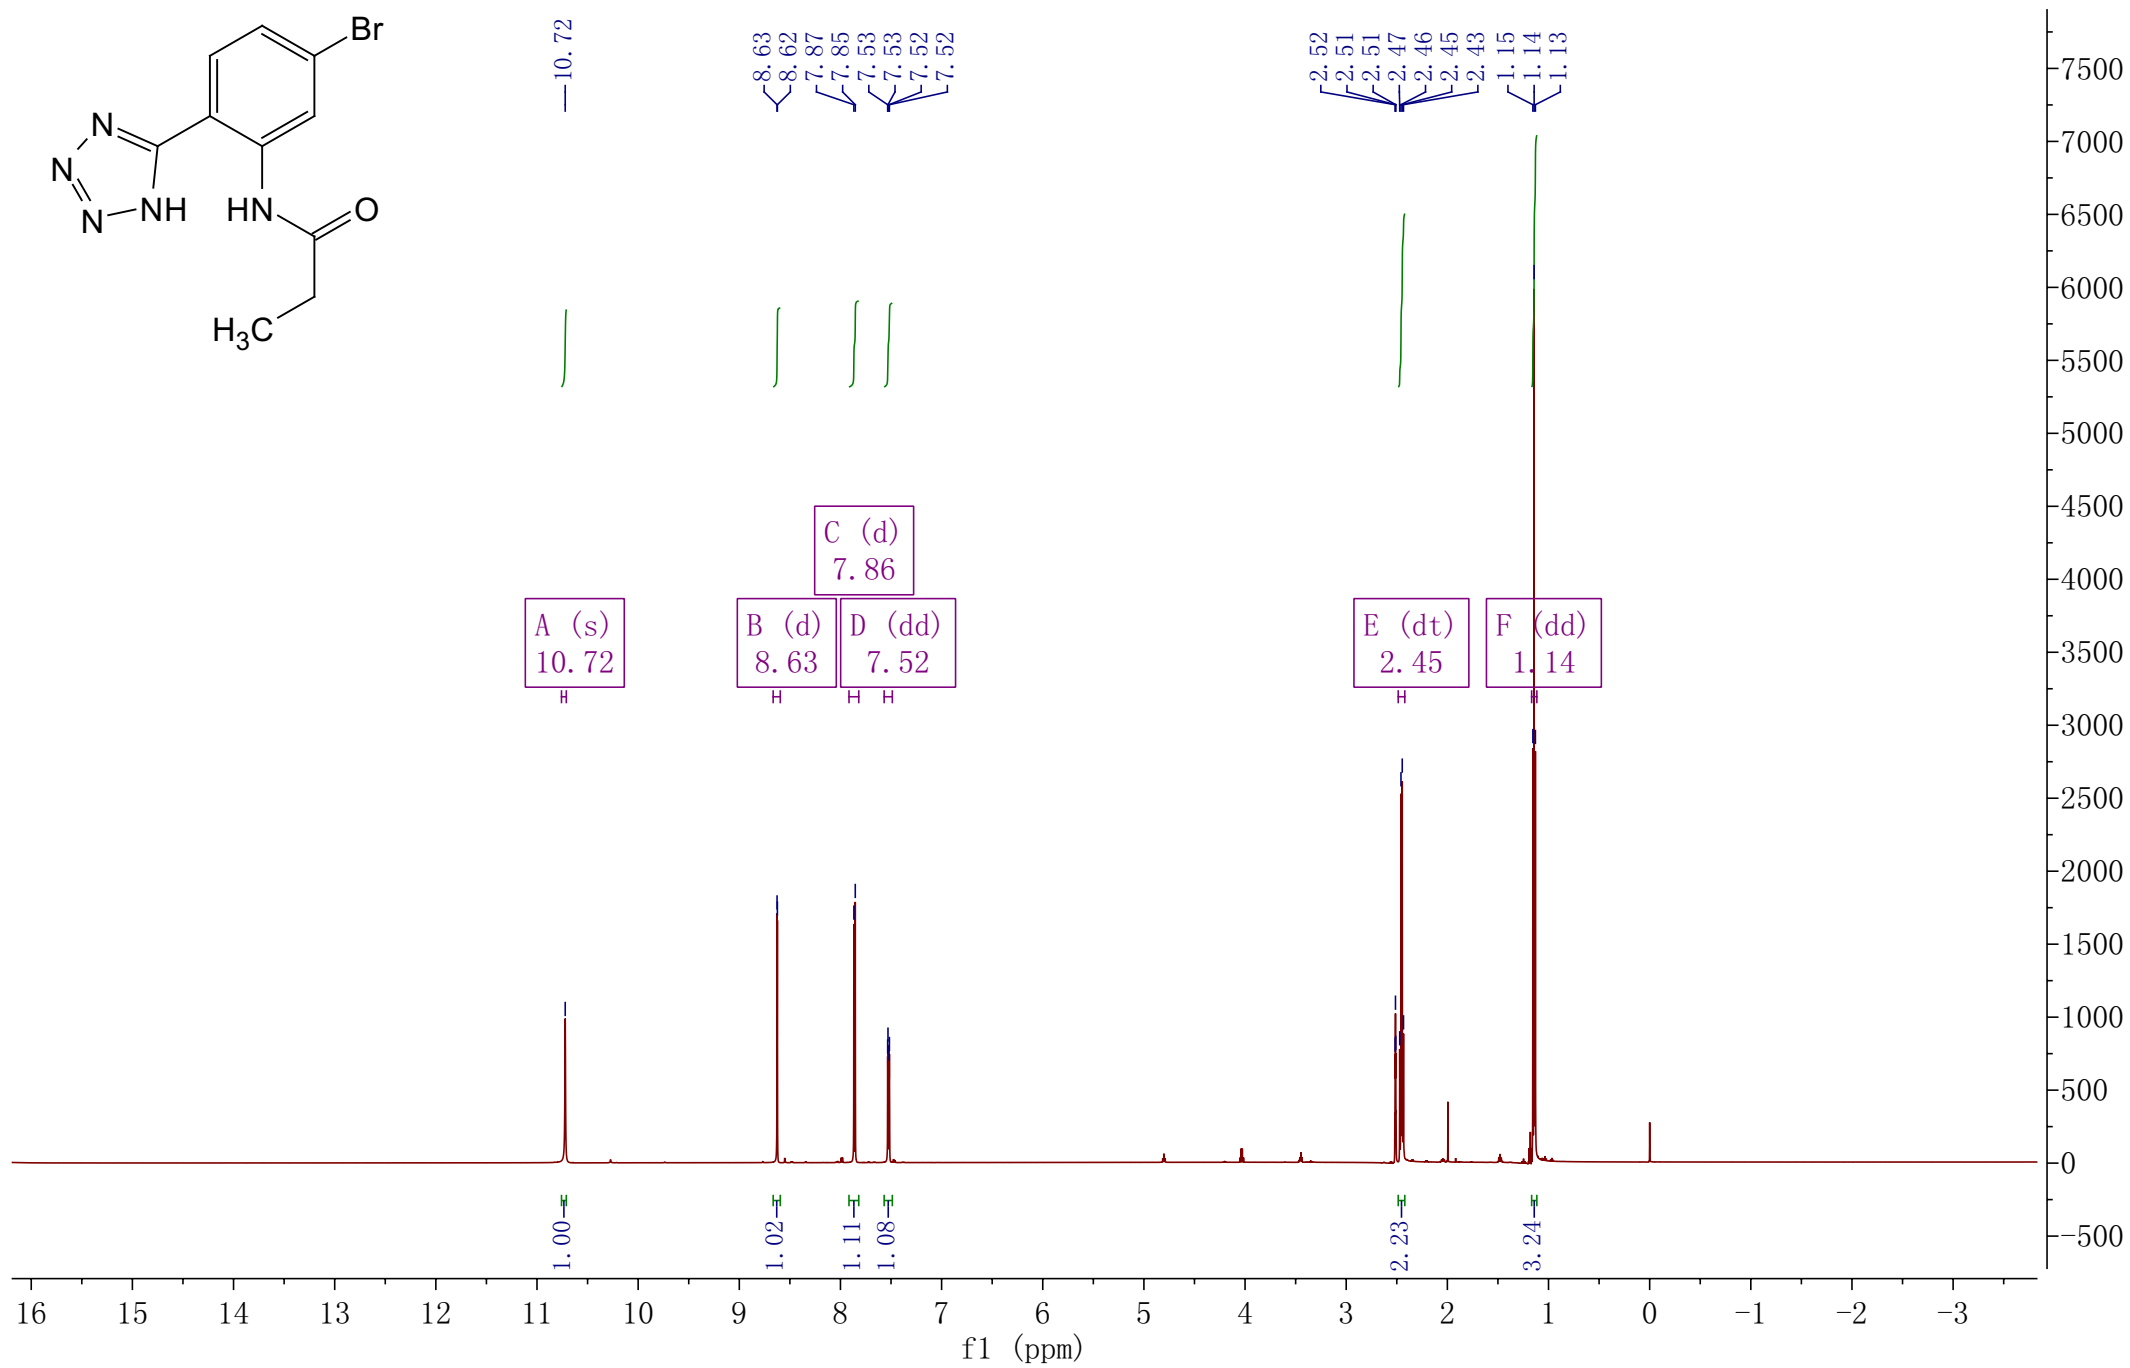

$^{13}\text{C}$  NMR (151 MHz, DMSO)  $\delta$  172.95, 154.62, 138.72, 130.84, 126.99, 125.25, 124.42, 112.83, 30.77, 9.71.

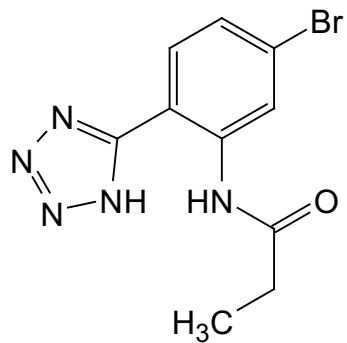

— 172.95      — 154.62      — 138.72      — 130.84  
— 126.99      — 125.25      — 124.42      — 112.83

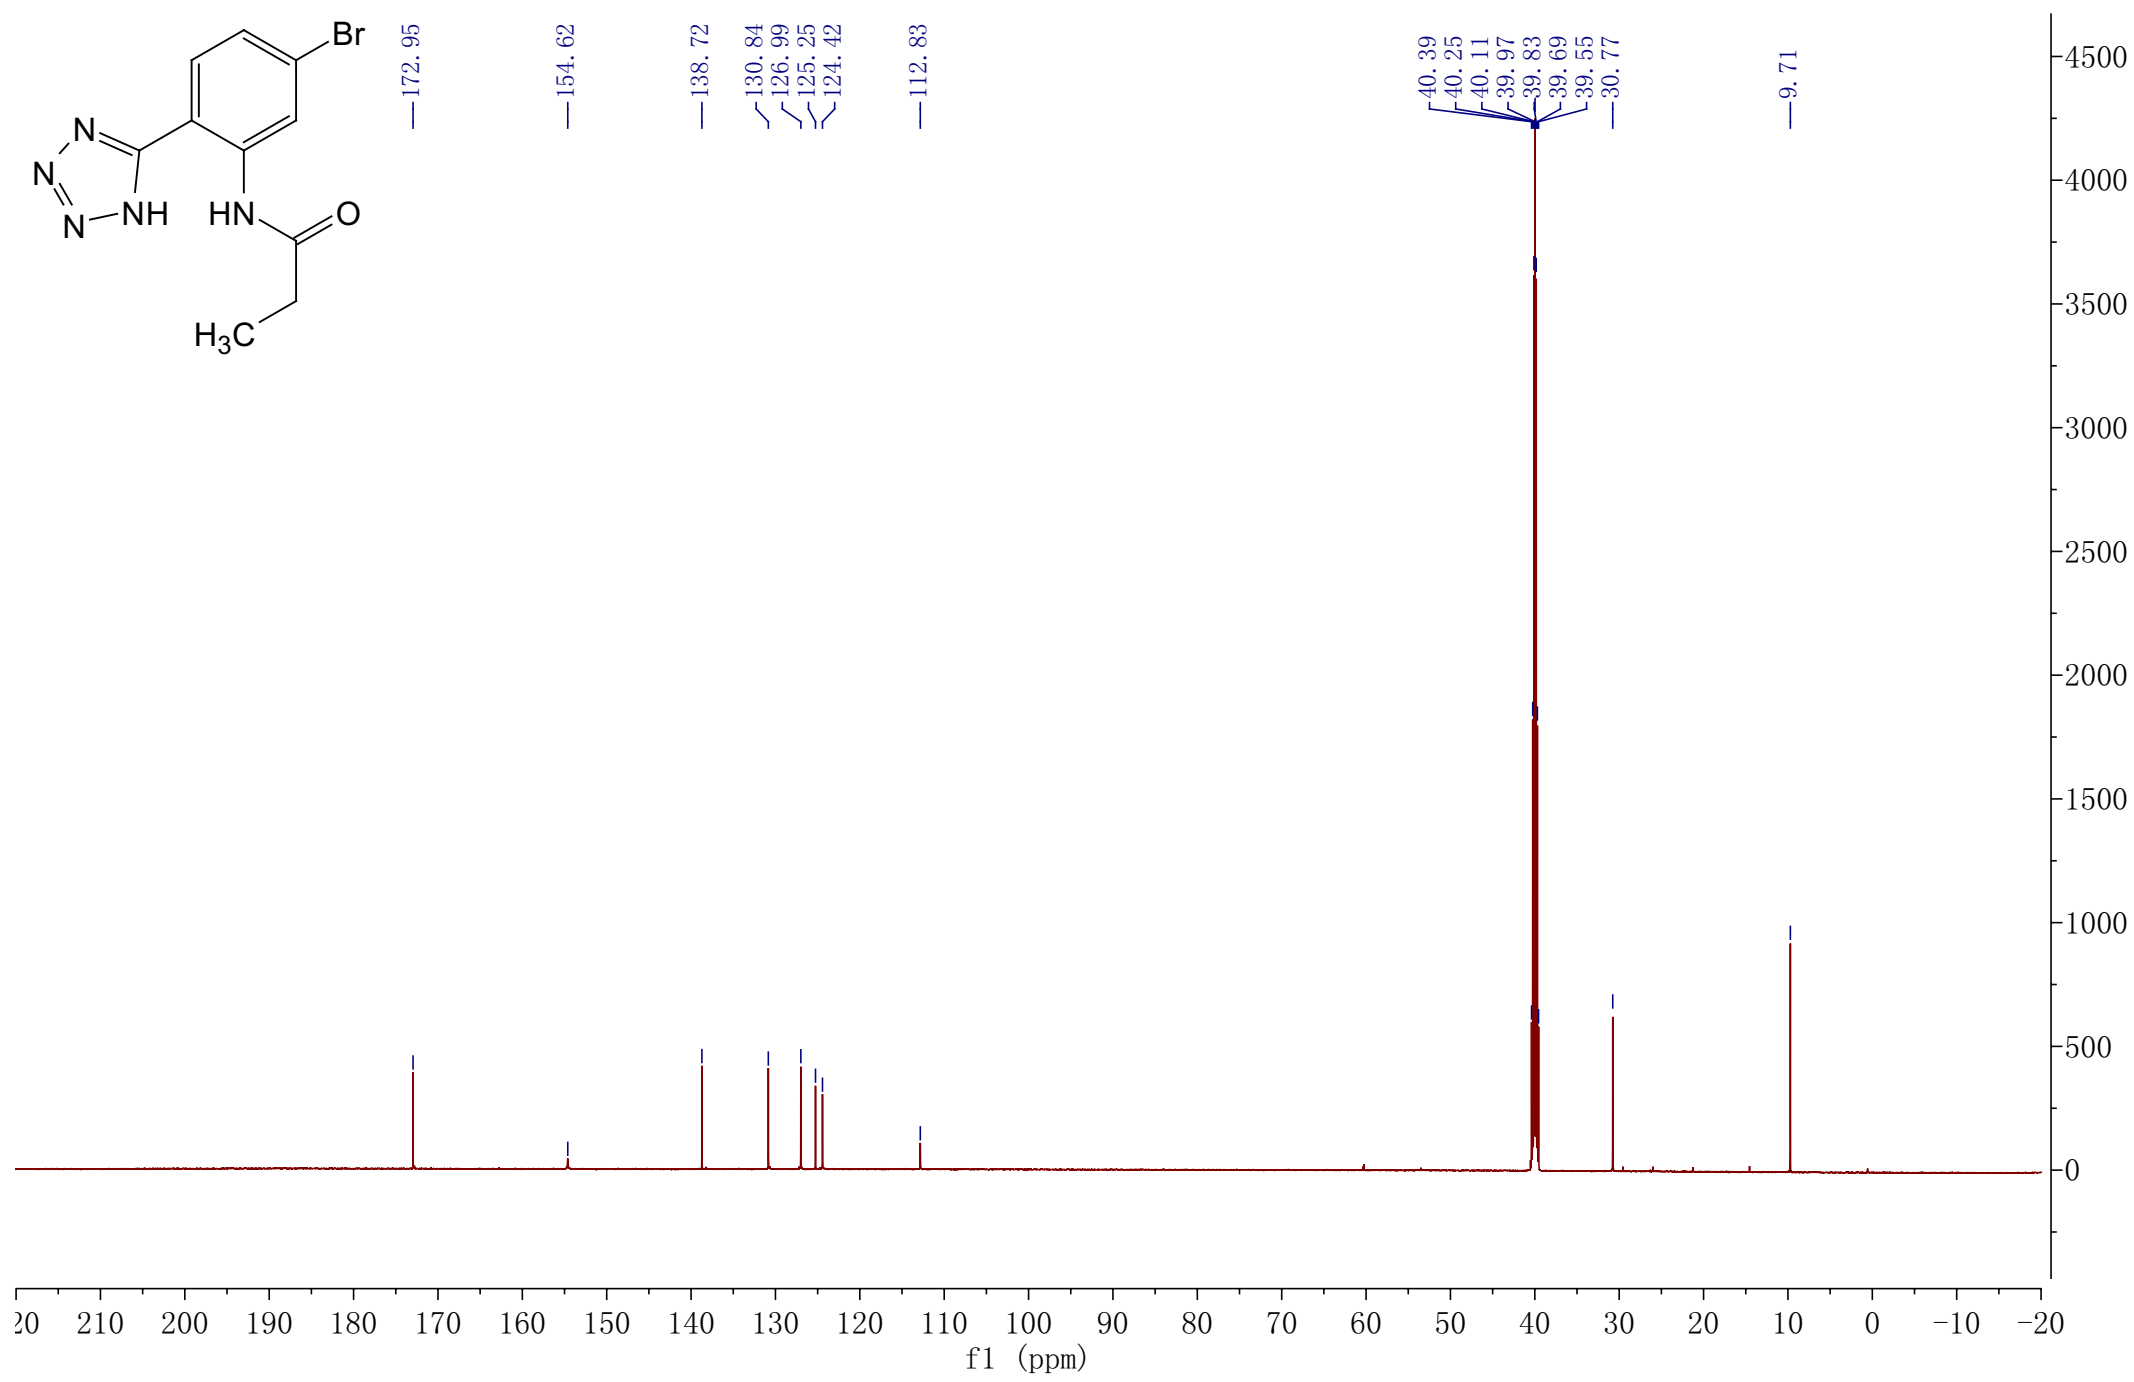

$^1\text{H}$  NMR (600 MHz, DMSO)  $\delta$  11.15 (s, 1H), 8.69 (d,  $J = 1.7$  Hz, 1H), 7.94 (d,  $J = 8.4$  Hz, 1H), 7.49 (dd,  $J = 8.4, 1.8$  Hz, 1H), 2.65 (dt,  $J = 13.8, 6.9$  Hz, 1H), 1.19 (d,  $J = 6.9$  Hz, 6H).

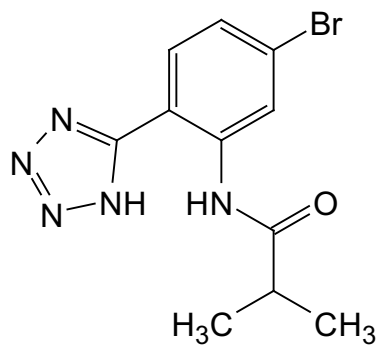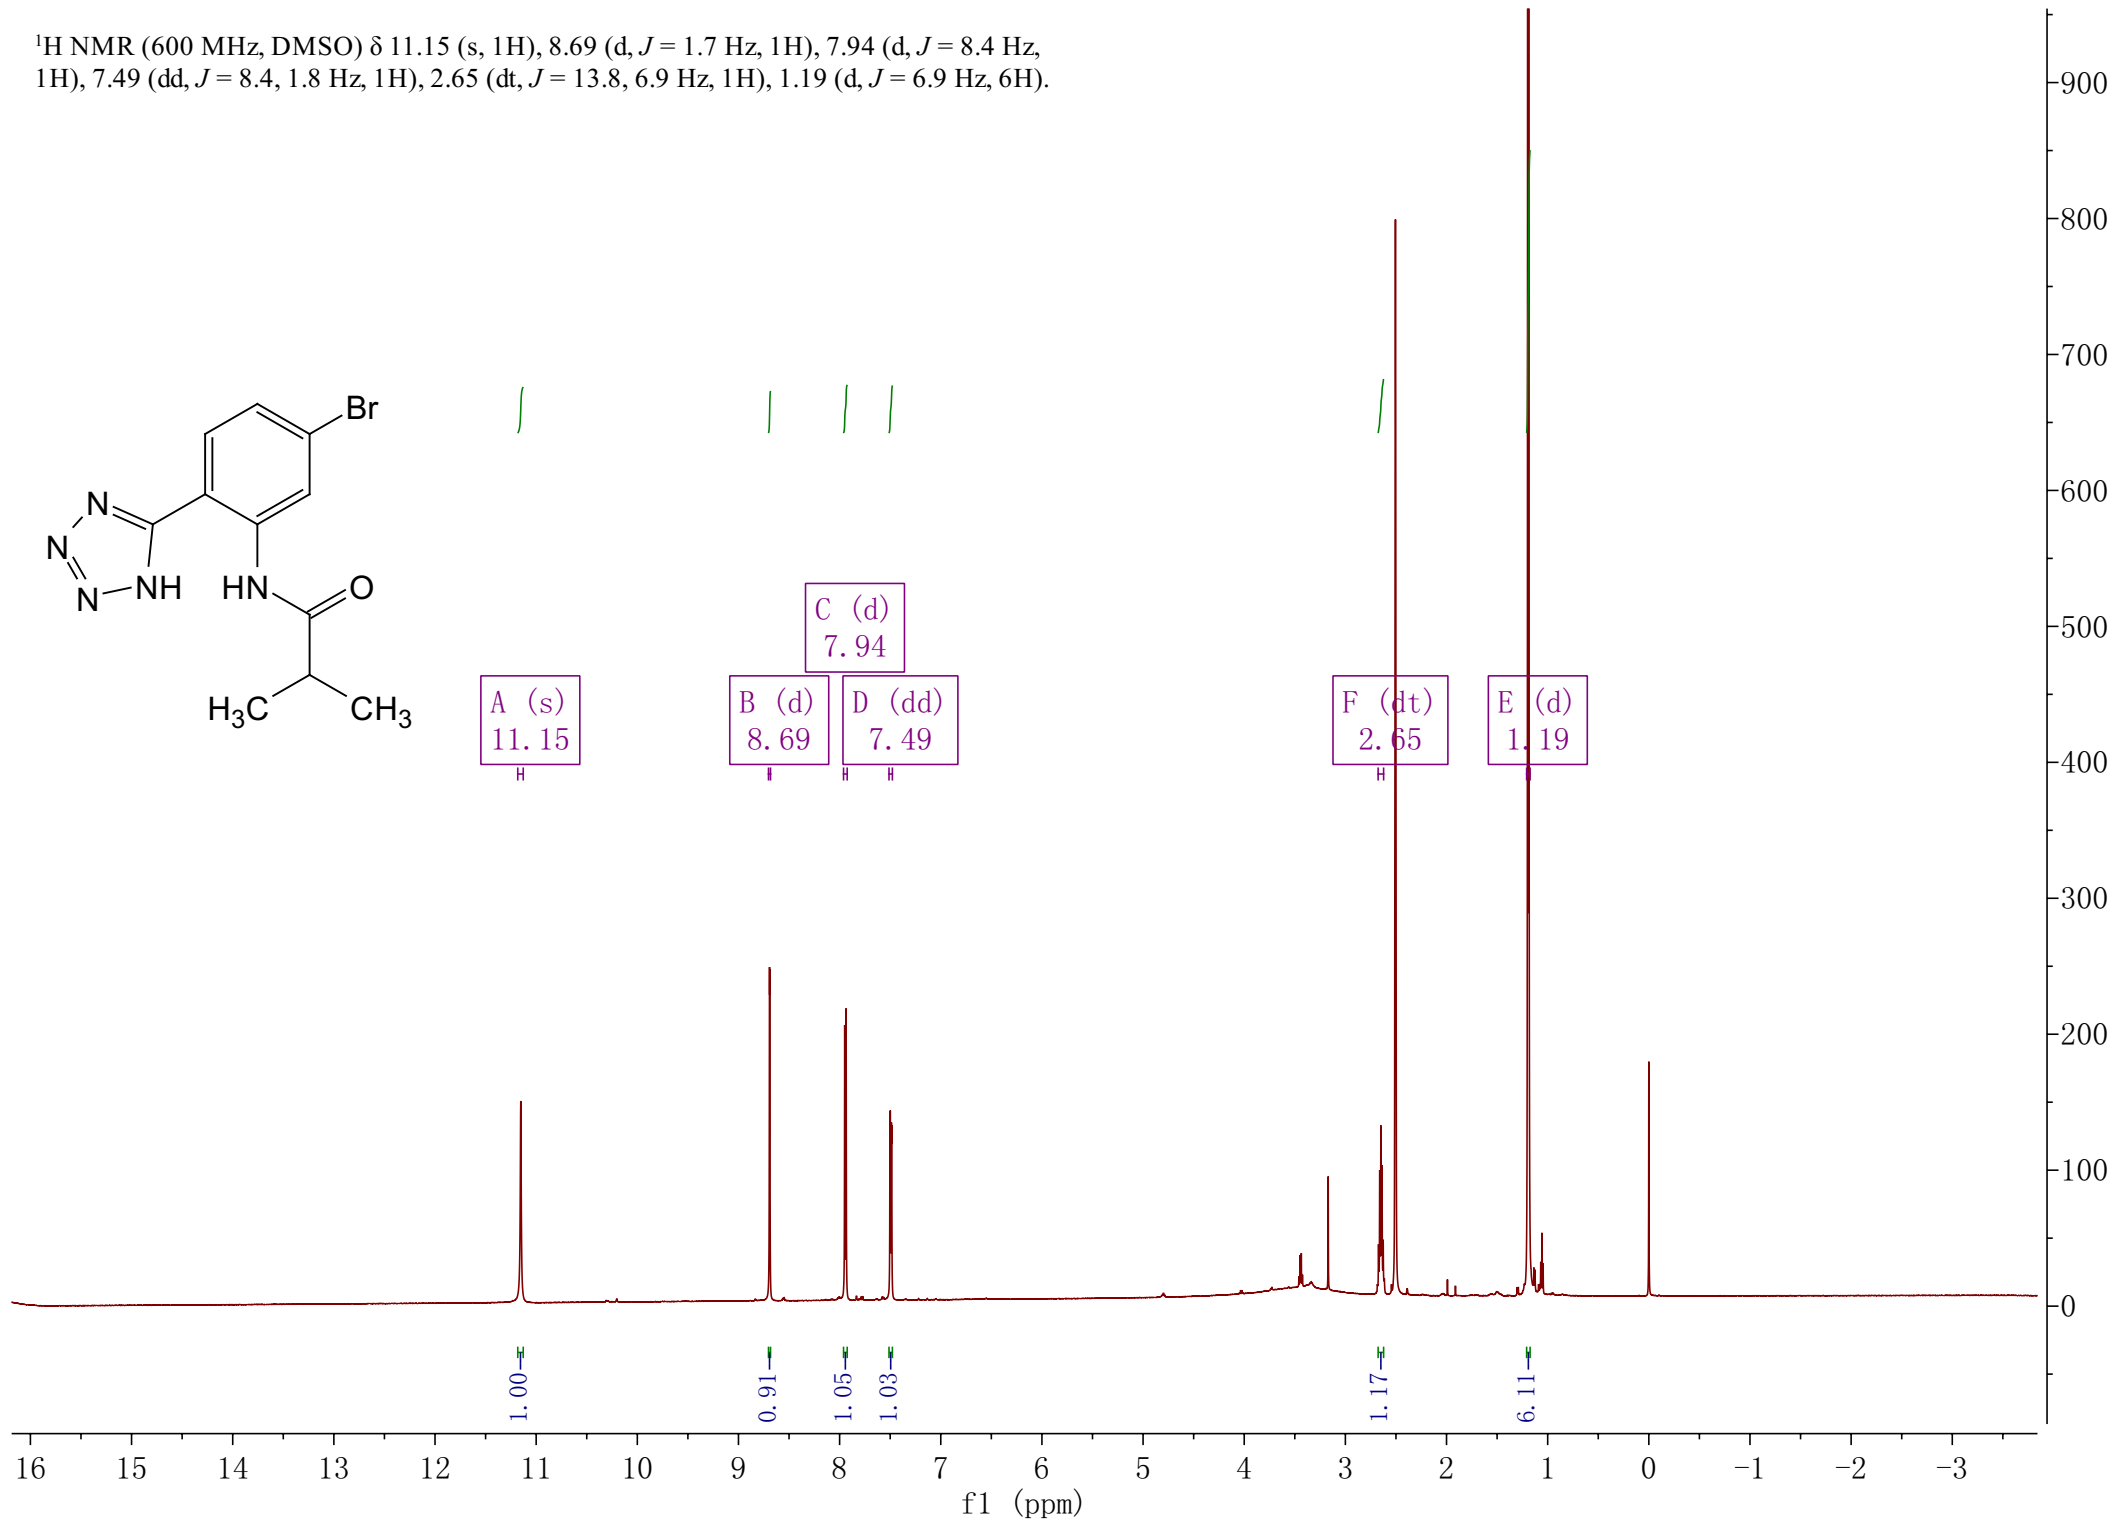

$^{13}\text{C}$  NMR (151 MHz, DMSO)  $\delta$  176.03, 155.62, 138.68, 130.57, 126.78, 124.45, 123.90, 113.88, 36.68, 19.69.

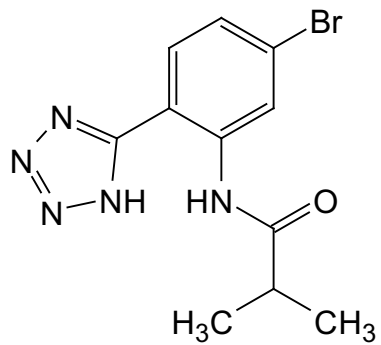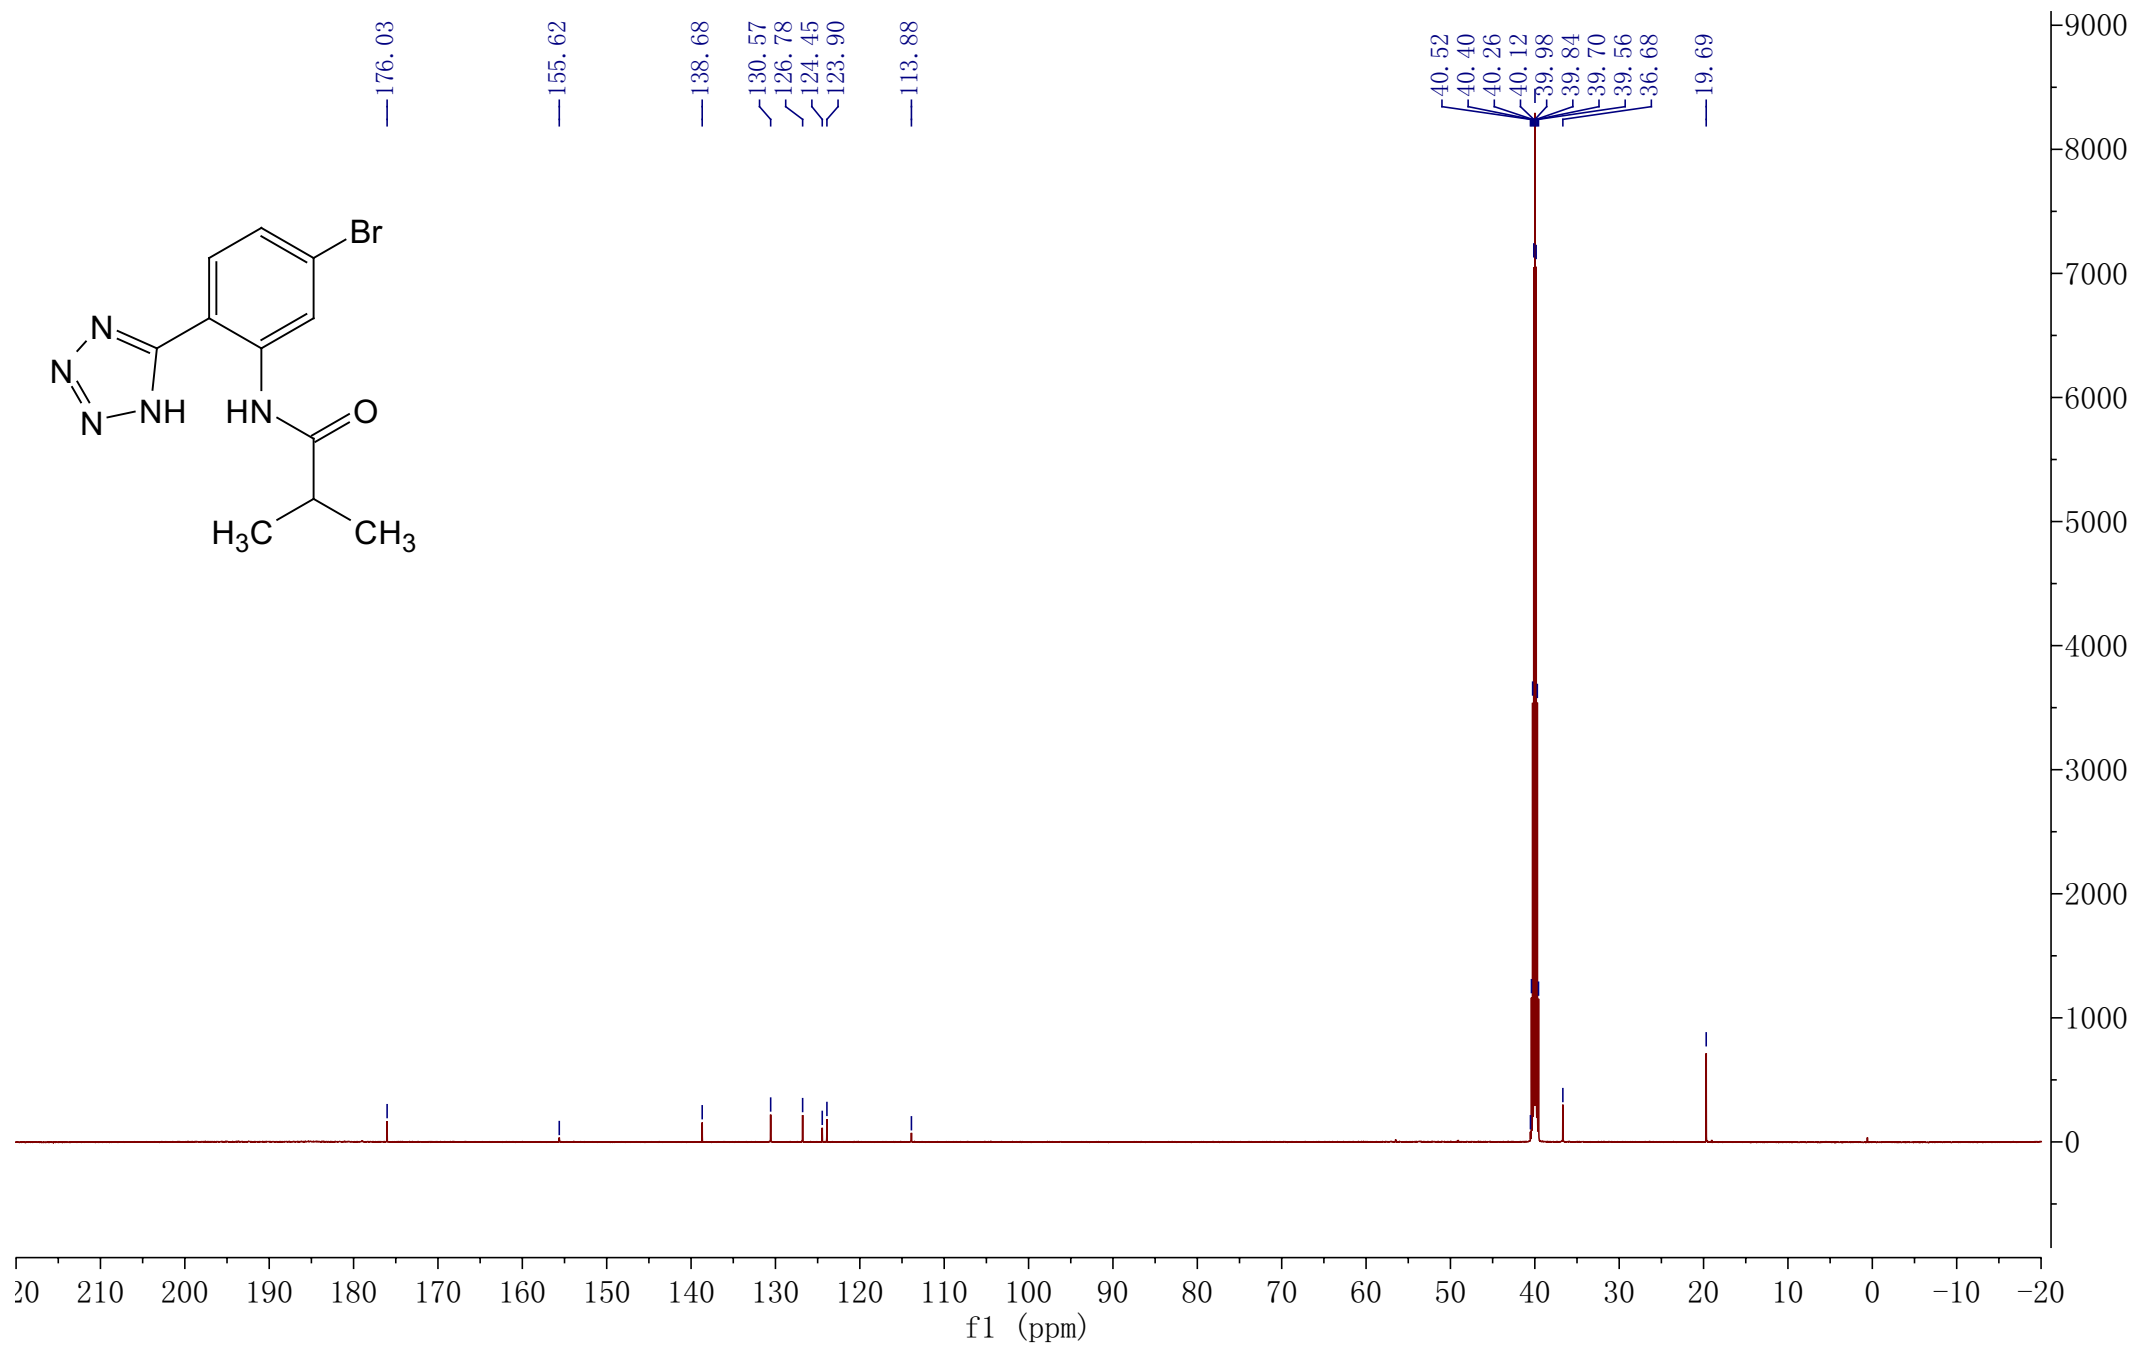



<sup>1</sup>H NMR (600 MHz, DMSO) δ 10.79 (s, 1H), 8.67 (d, *J* = 2.0 Hz, 1H), 7.87 (d, *J* = 8.4 Hz, 1H), 7.53 (dd, *J* = 8.4, 2.0 Hz, 1H), 2.38 (tt, *J* = 11.4, 3.5 Hz, 1H), 1.93 (dd, *J* = 13.5, 2.0 Hz, 2H), 1.80 – 1.72 (m, 2H), 1.68 – 1.63 (m, 1H), 1.49 – 1.39 (m, 2H), 1.38 – 1.27 (m, 2H), 1.25 – 1.15 (m, 1H).

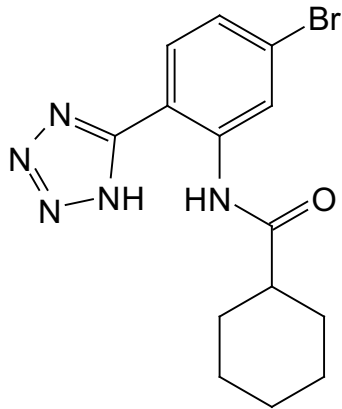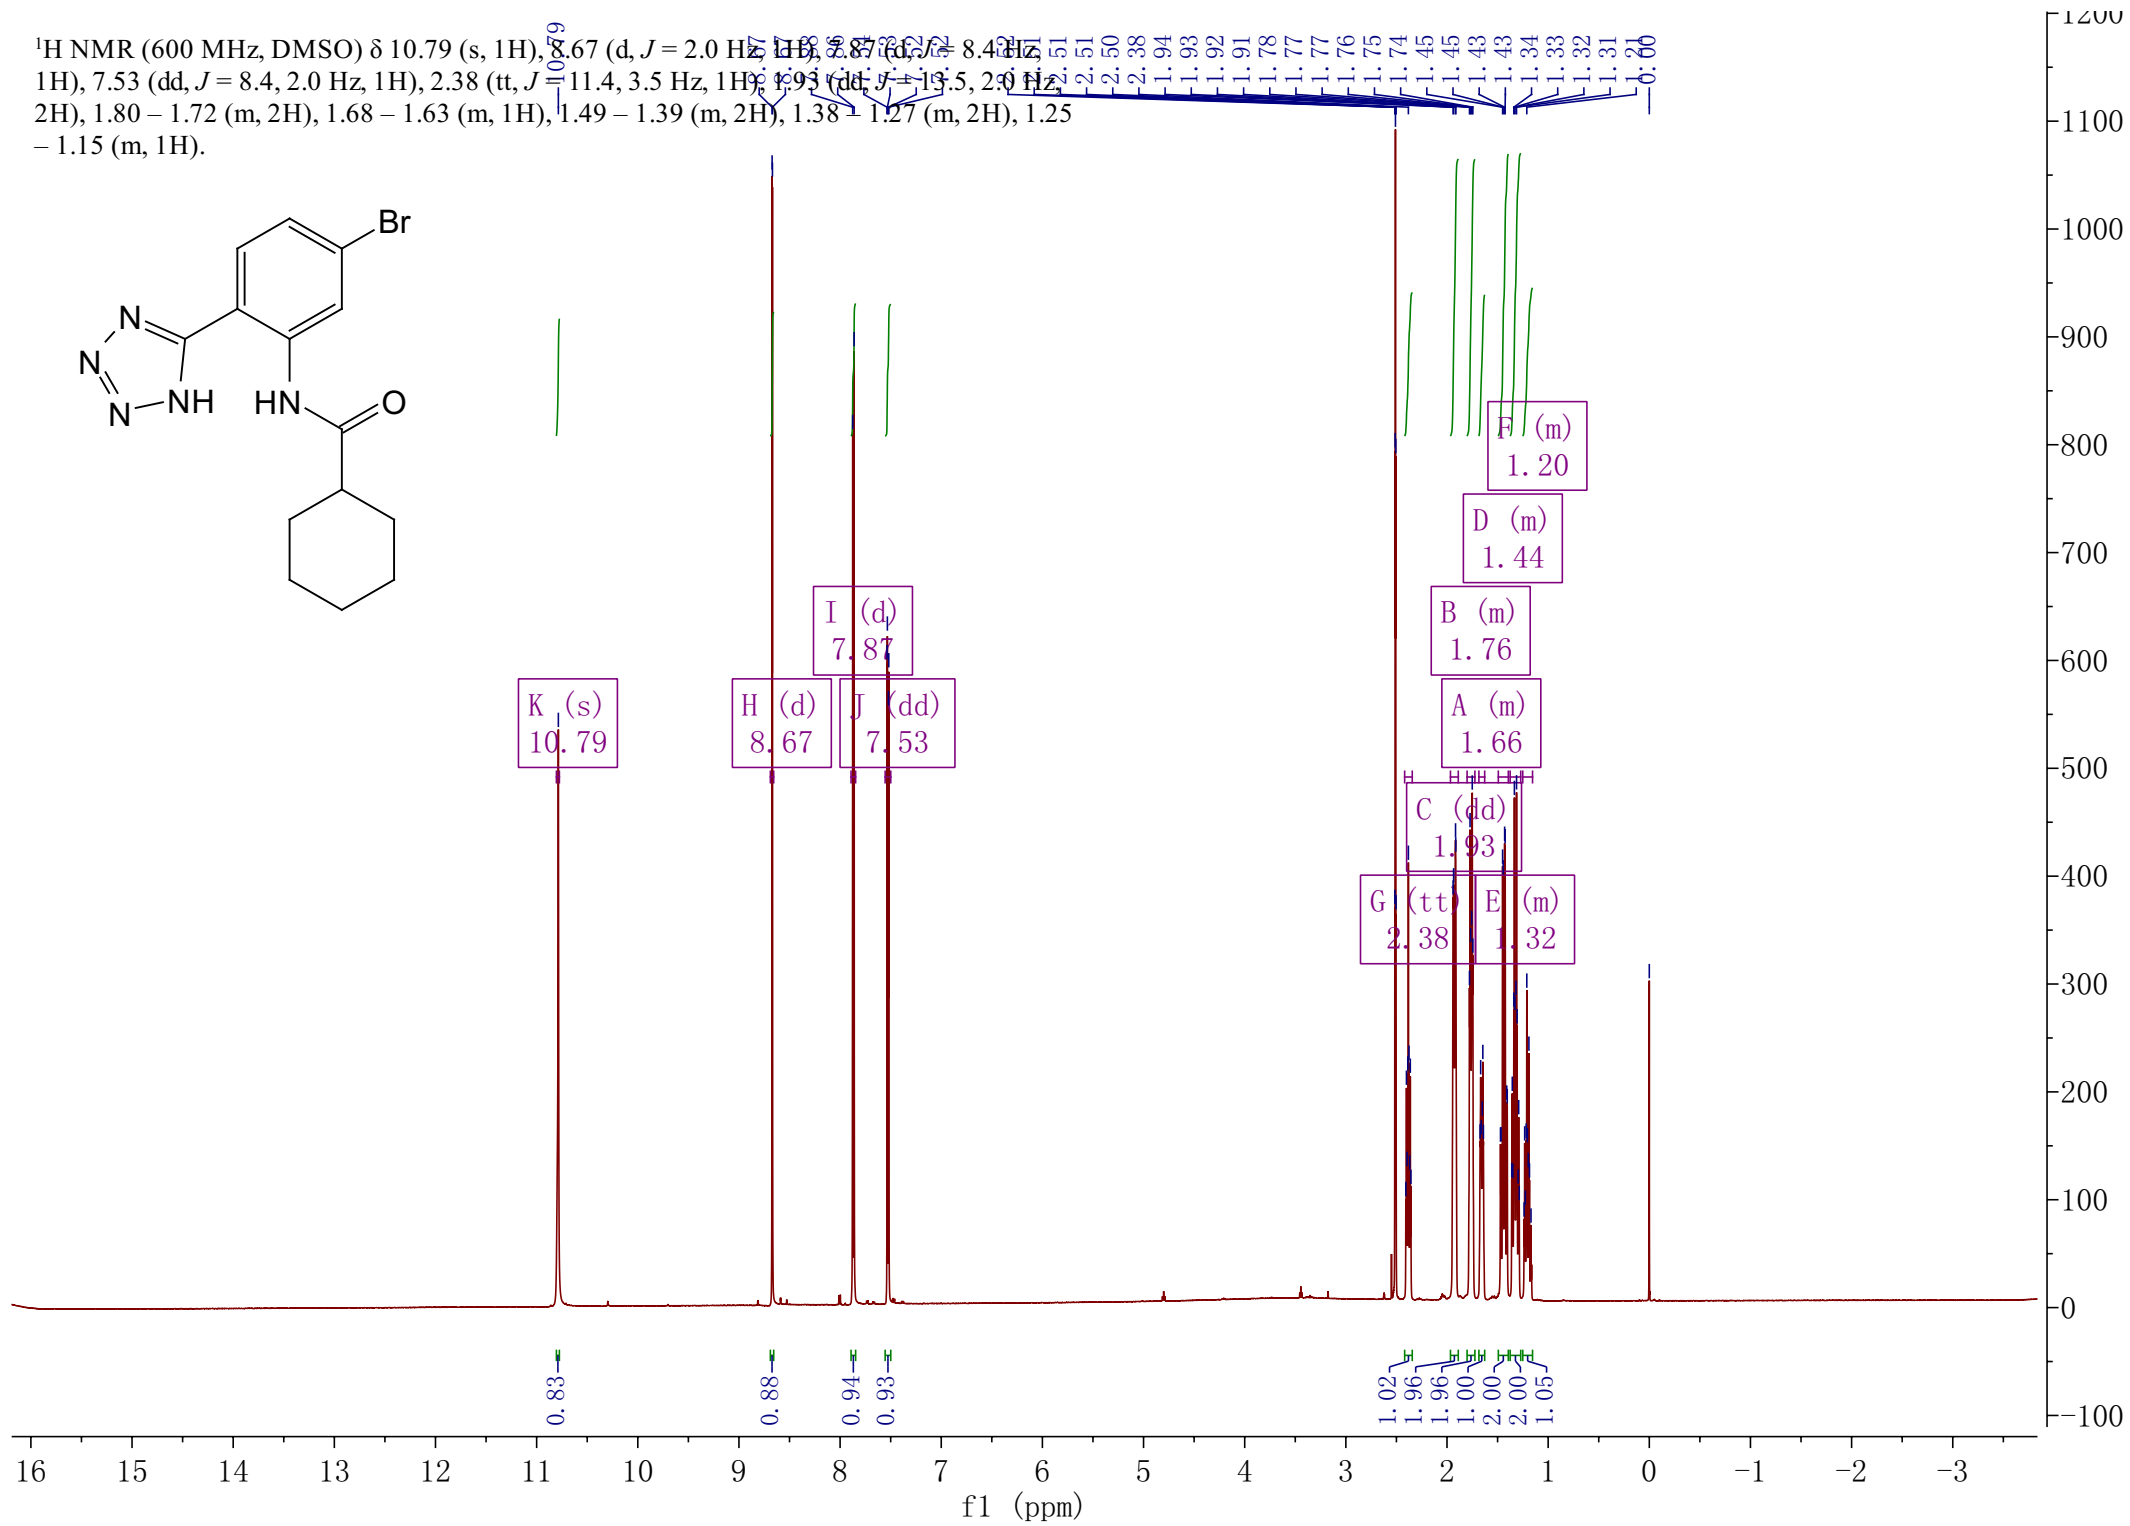

$^{13}\text{C}$  NMR (151 MHz, DMSO)  $\delta$  175.05, 154.77, 138.83, 130.77, 126.94, 125.25, 124.30, 112.80, 46.03, 29.38, 25.85, 25.54.

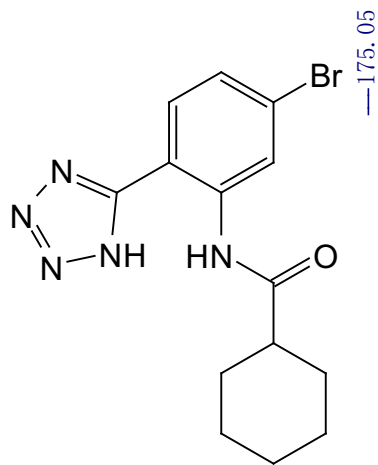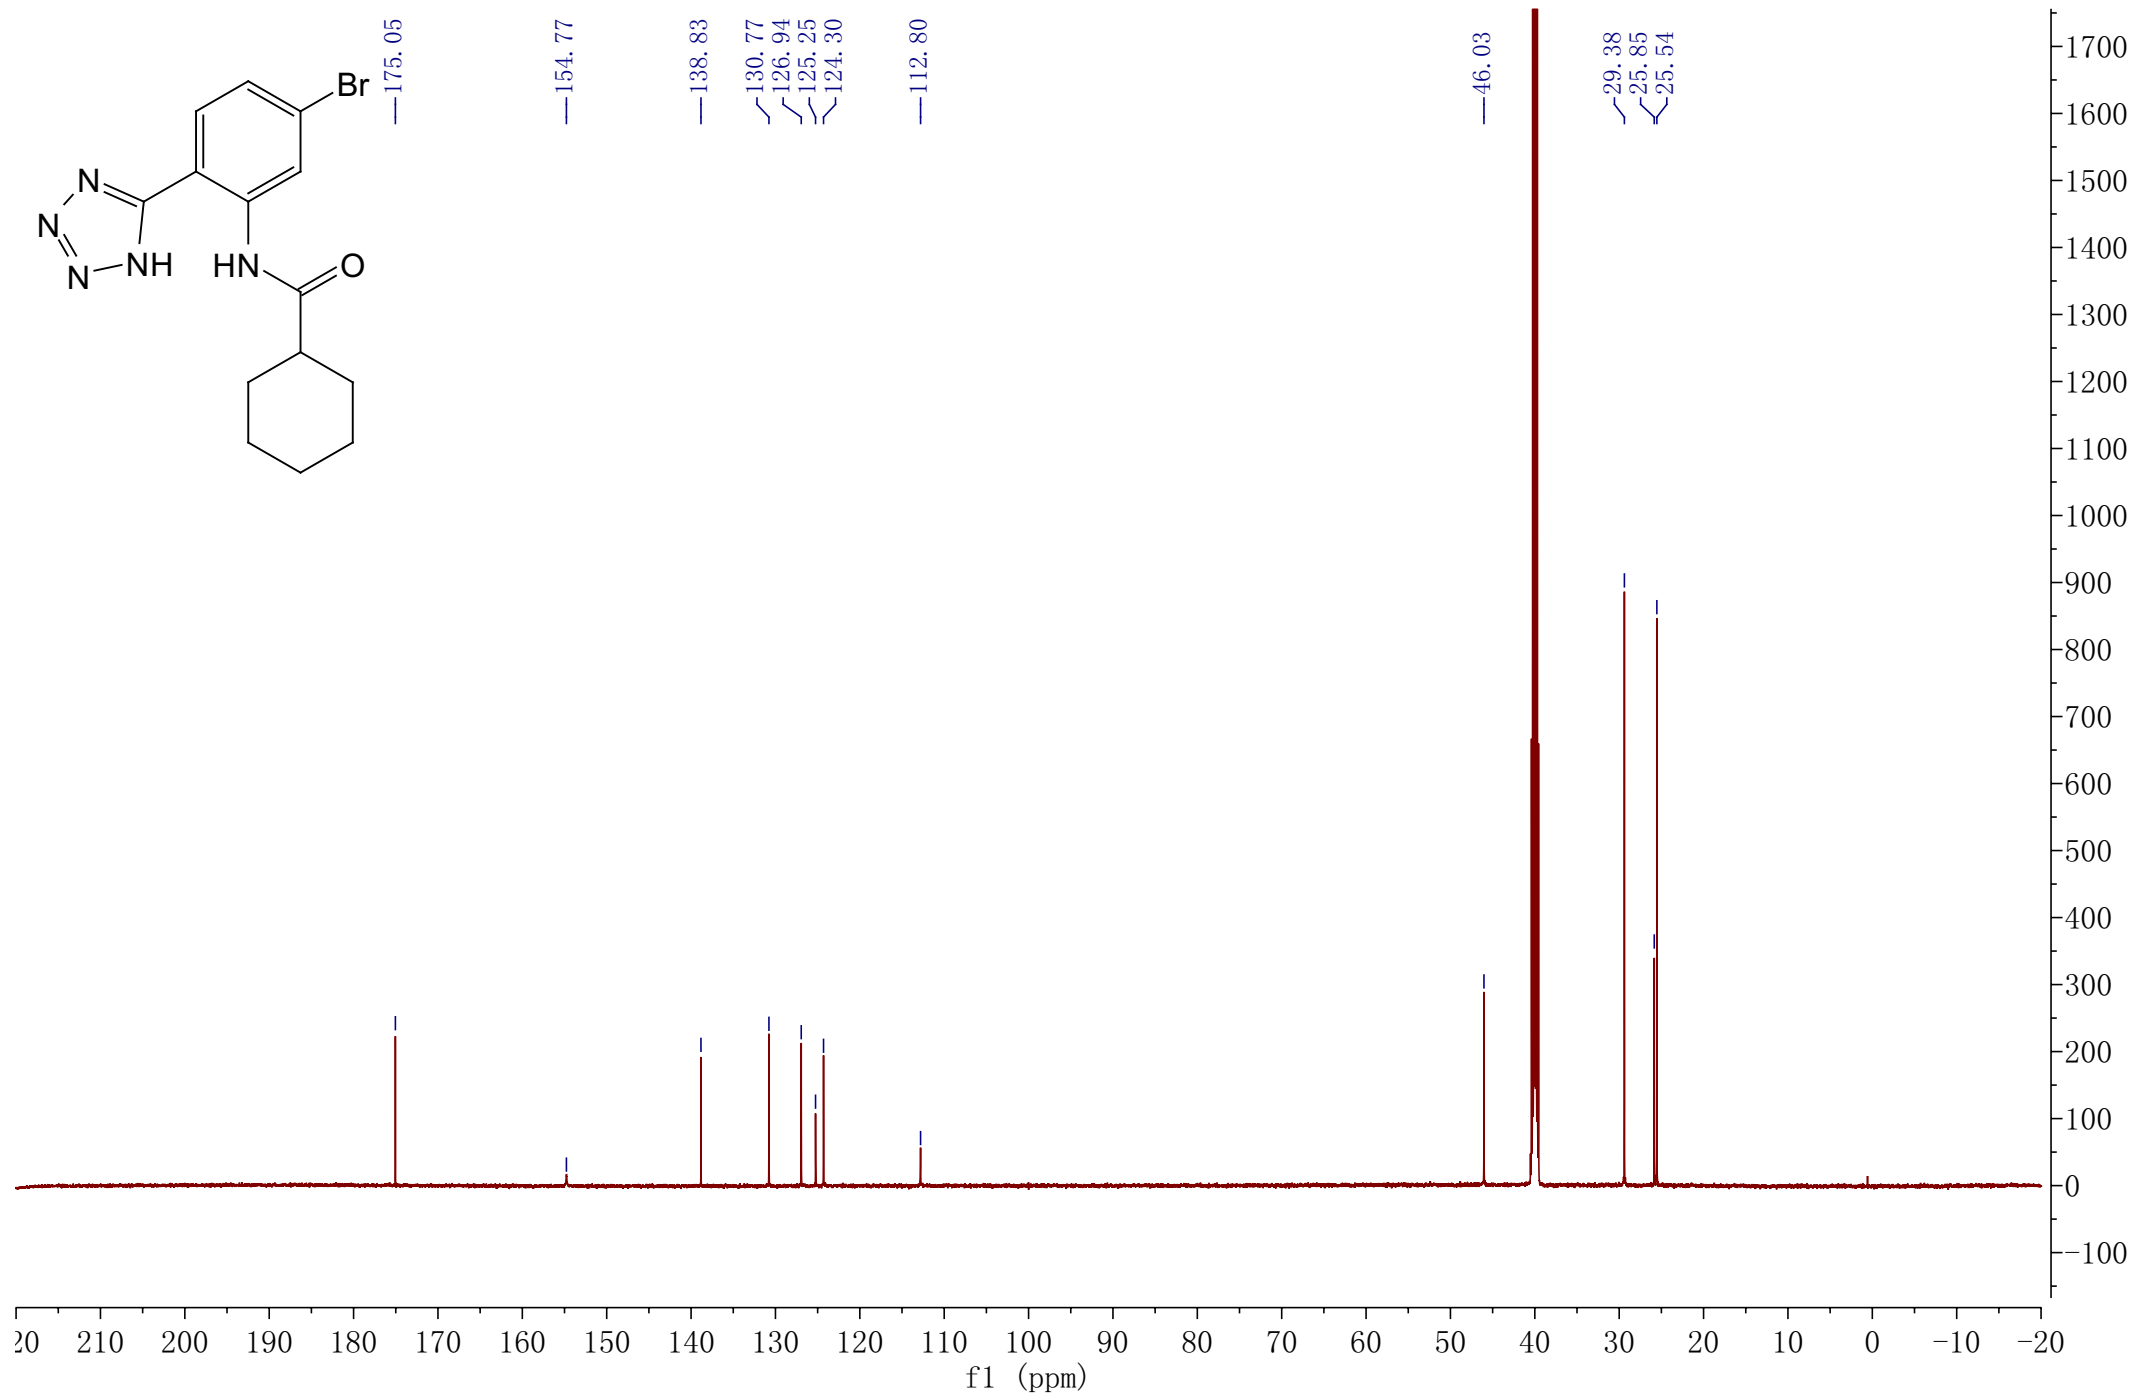

$^1\text{H}$  NMR (600 MHz, DMSO)  $\delta$  11.83 (s, 1H), 8.86 (d,  $J = 2.0$  Hz, 1H), 8.09 (t,  $J = 7.9$  Hz, 1H), 7.96 (d,  $J = 8.4$  Hz, 1H), 7.56 (dd,  $J = 8.4, 2.0$  Hz, 1H), 7.36 (d,  $J = 3.2$  Hz, 1H), 6.80 (dt,  $J = 8.0, 4.0$  Hz, 1H).

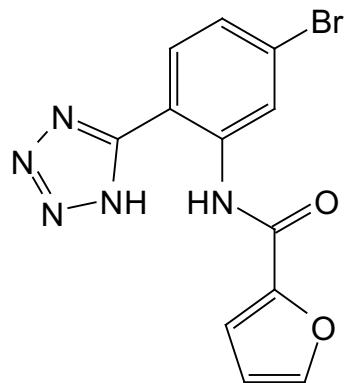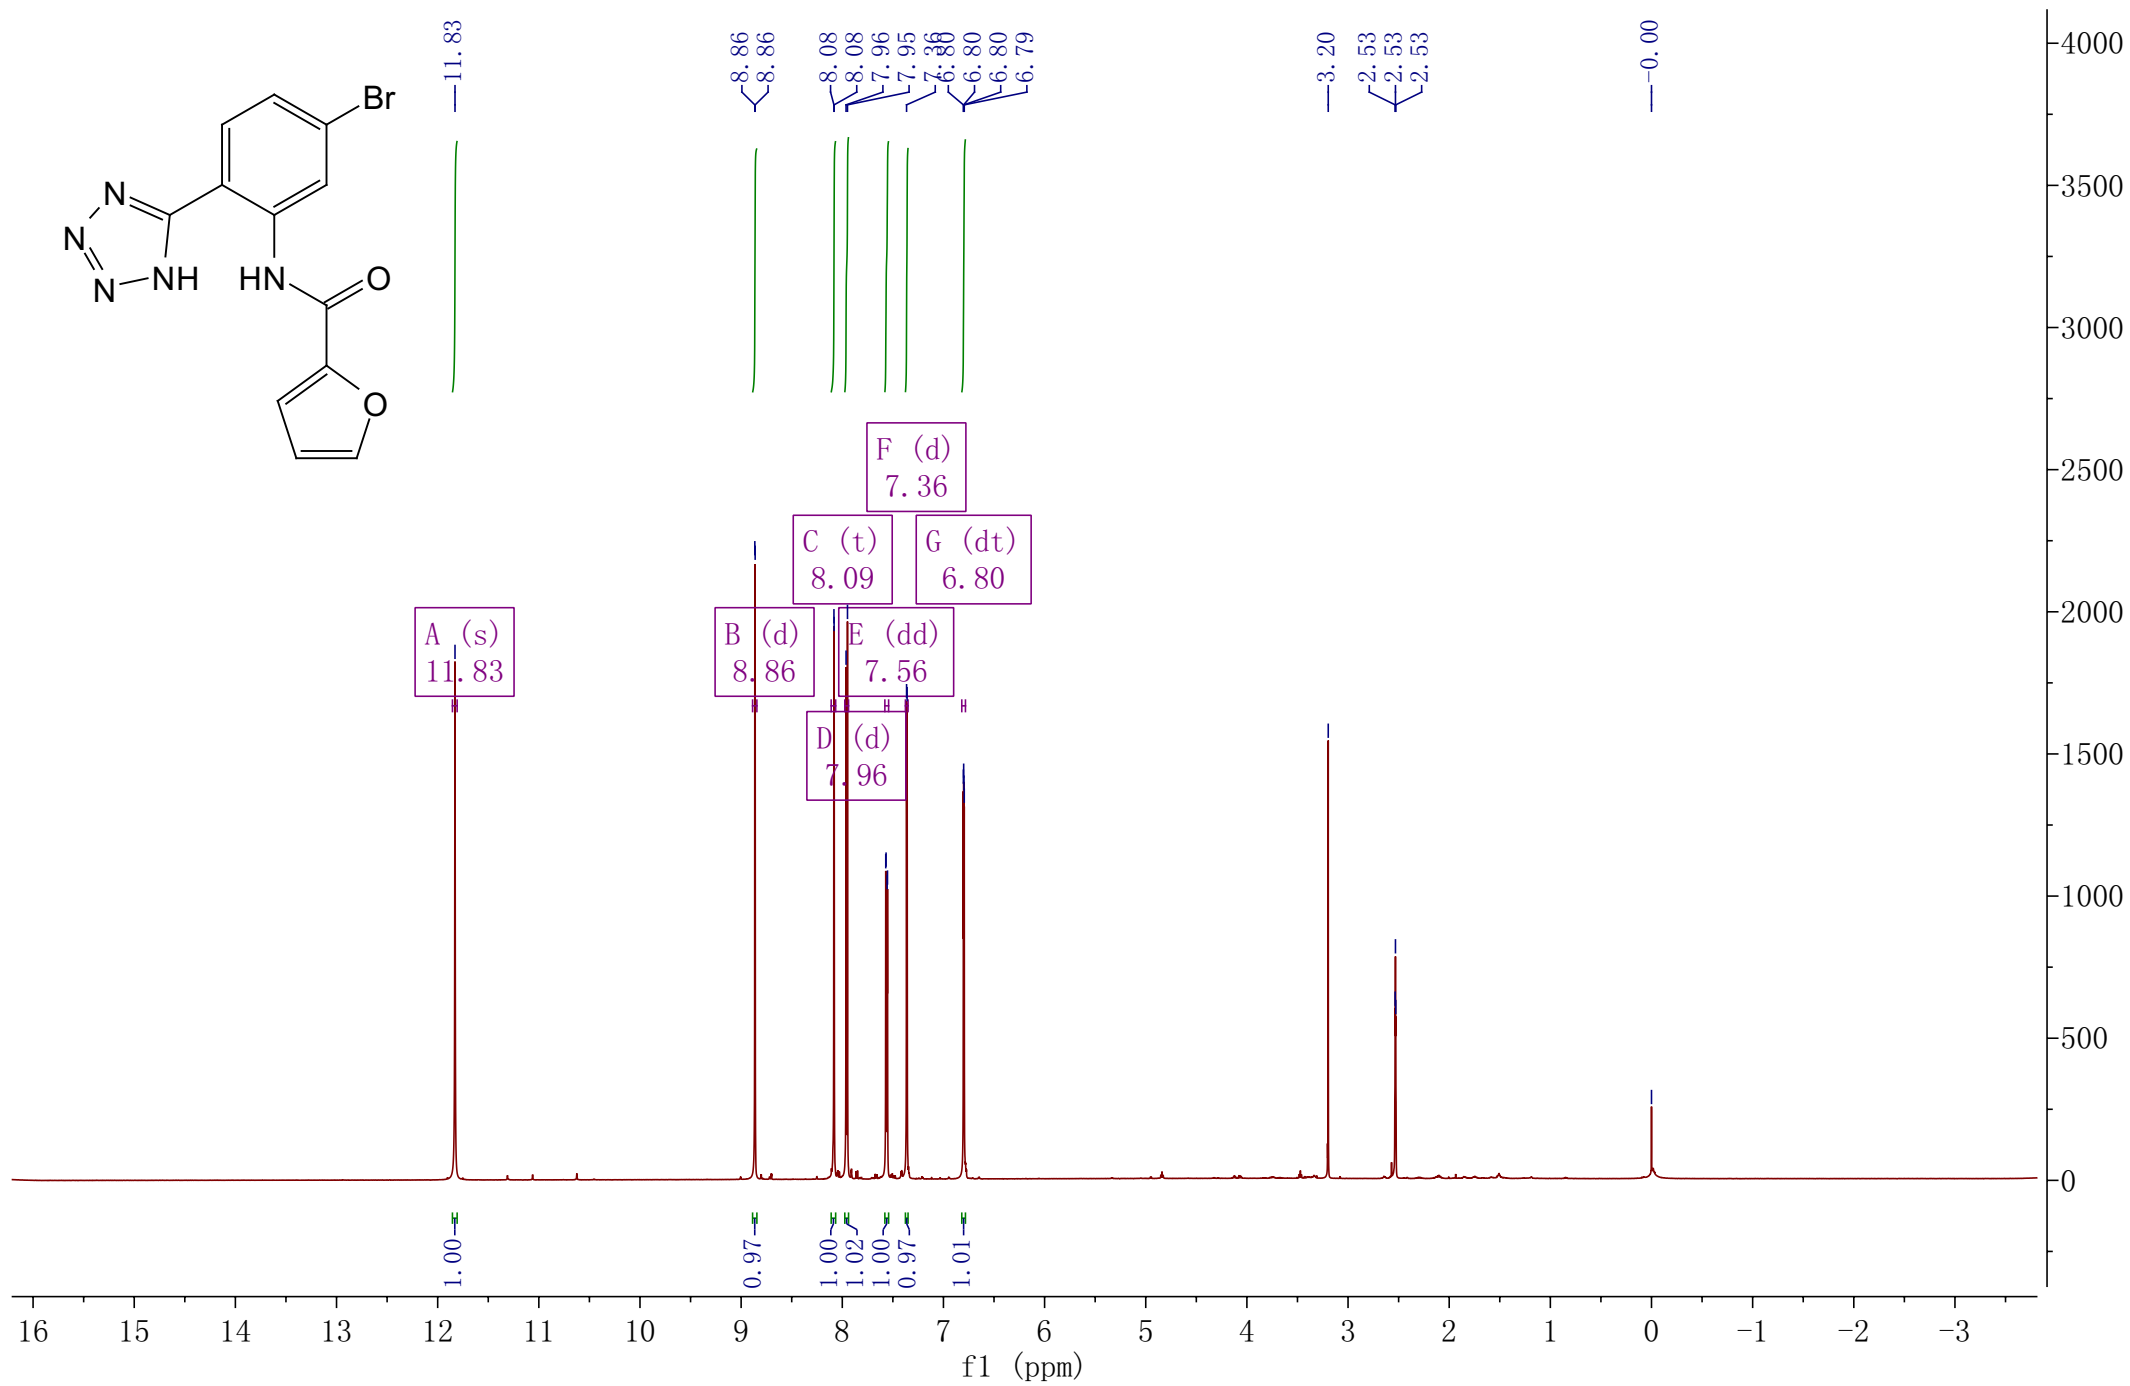

$^{13}\text{C}$  NMR (151 MHz, DMSO)  $\delta$  156.53, 154.91, 147.43, 147.10, 138.27, 130.49, 127.21, 125.40, 123.85, 116.46, 113.23, 112.22, 40.38, 40.24, 40.10, 39.96, 39.82, 39.68, 39.54.

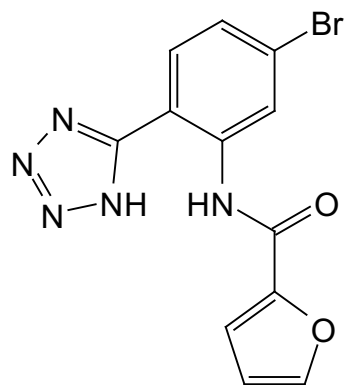

156.53  
154.91  
147.43  
147.10  
138.27  
130.49  
127.21  
125.40  
123.85  
116.46  
113.23  
112.22

40.38  
40.24  
40.10  
39.96  
39.82  
39.68  
39.54

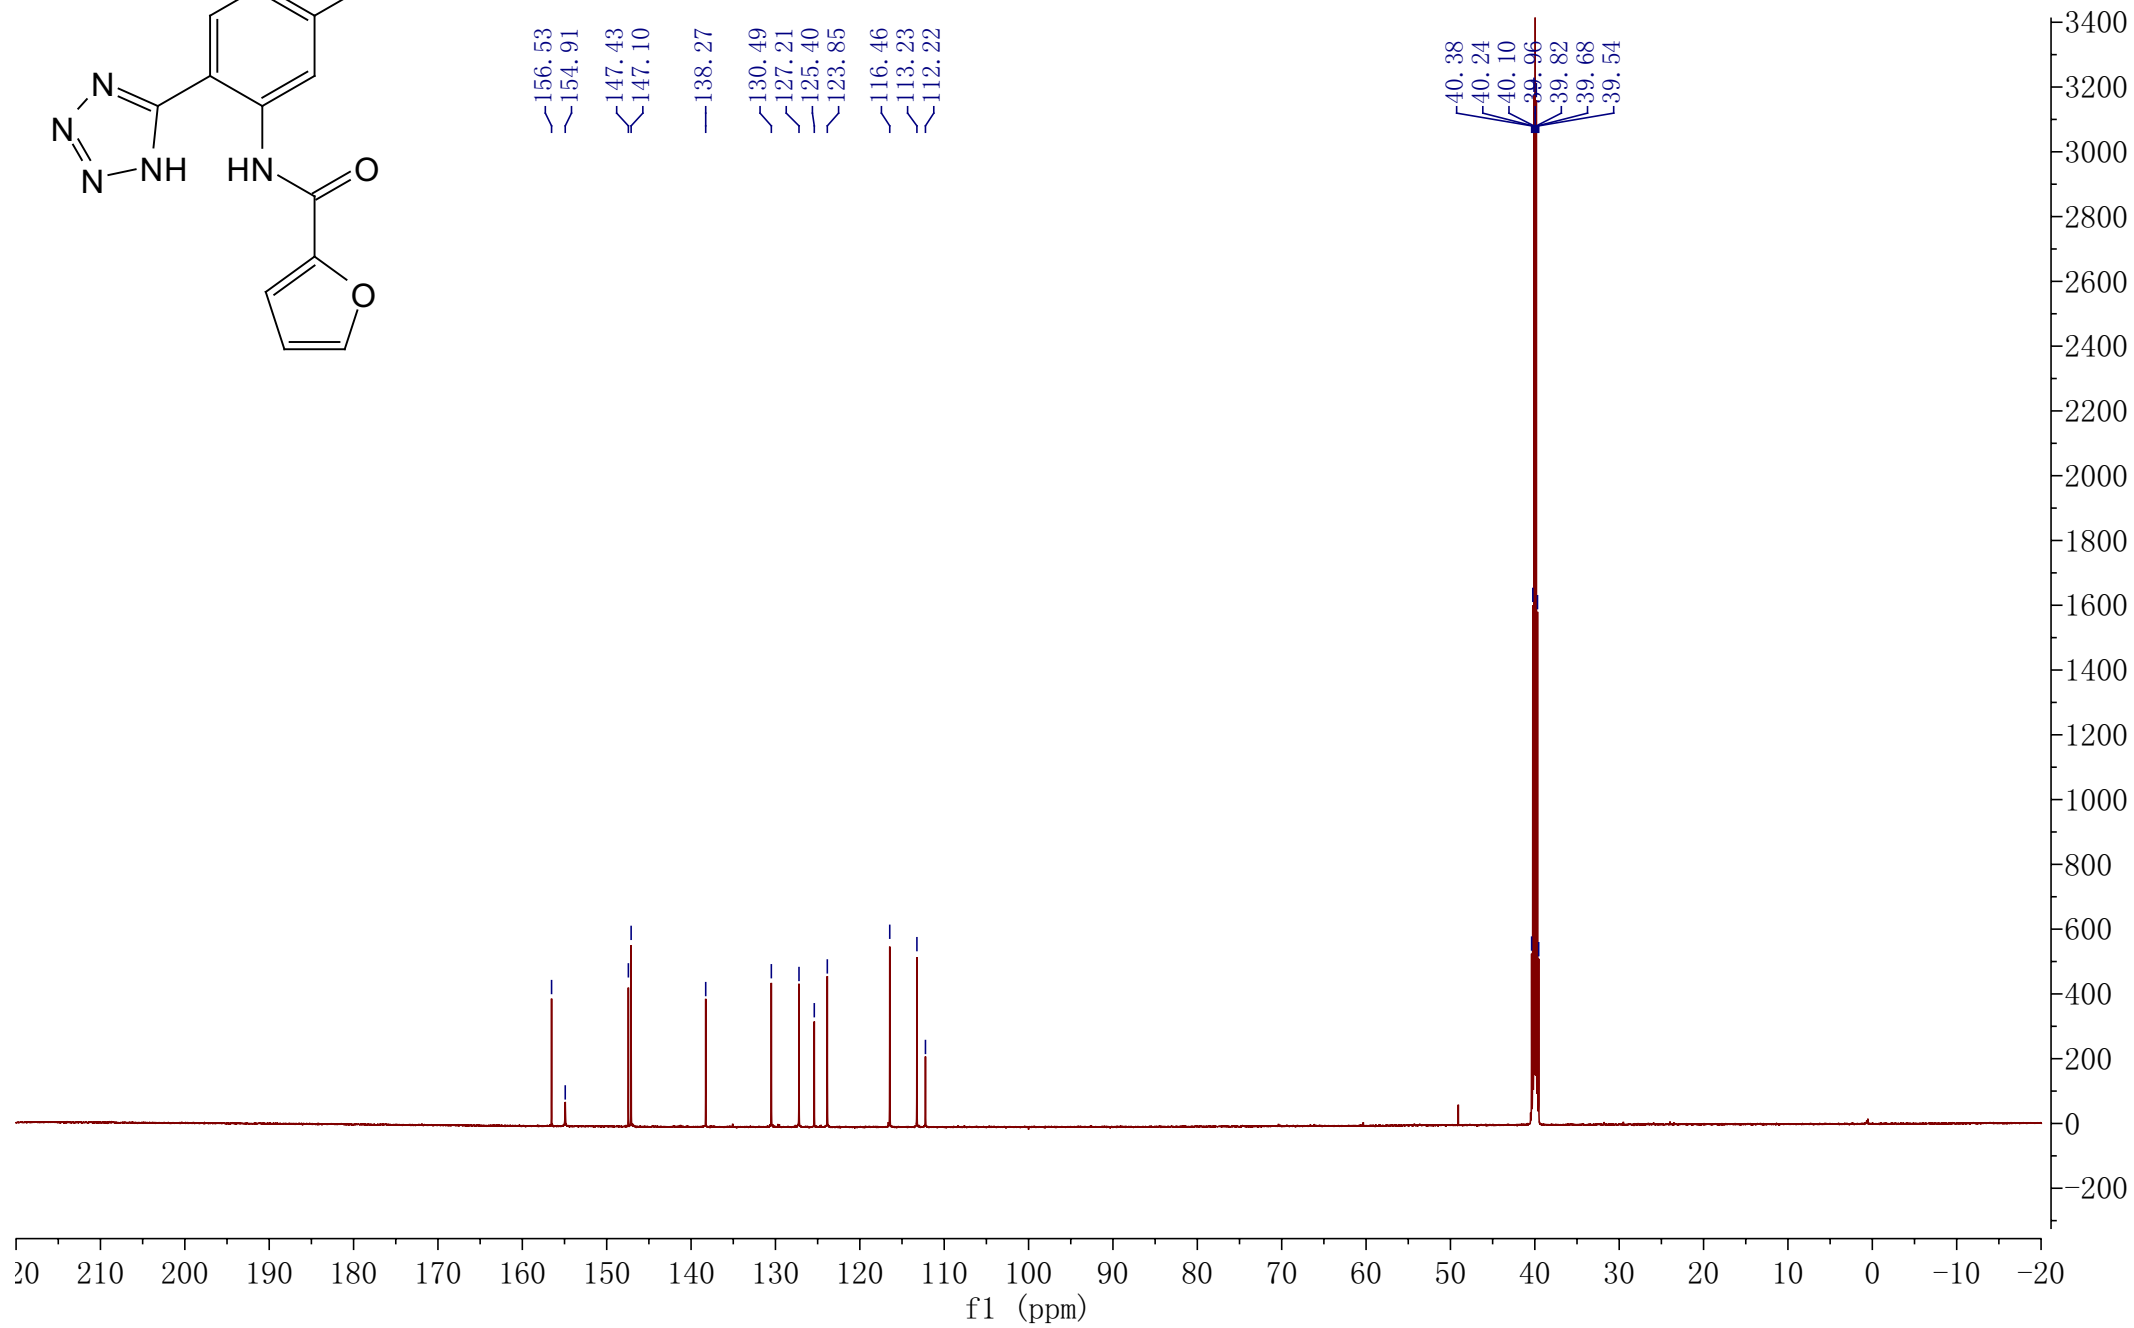

$^1\text{H}$  NMR (600 MHz, DMSO)  $\delta$  11.72 (s, 1H), 8.76 (d,  $J = 2.0$  Hz, 1H), 7.99 (dd,  $J = 5.0, 1.0$  Hz, 1H), 7.96 – 7.94 (m, 2H), 7.57 (dd,  $J = 8.4, 2.0$  Hz, 1H), 7.33 (dd,  $J = 4.9, 3.8$  Hz, 1H).

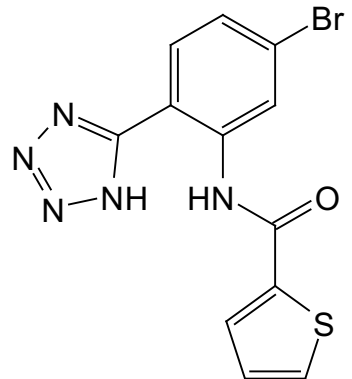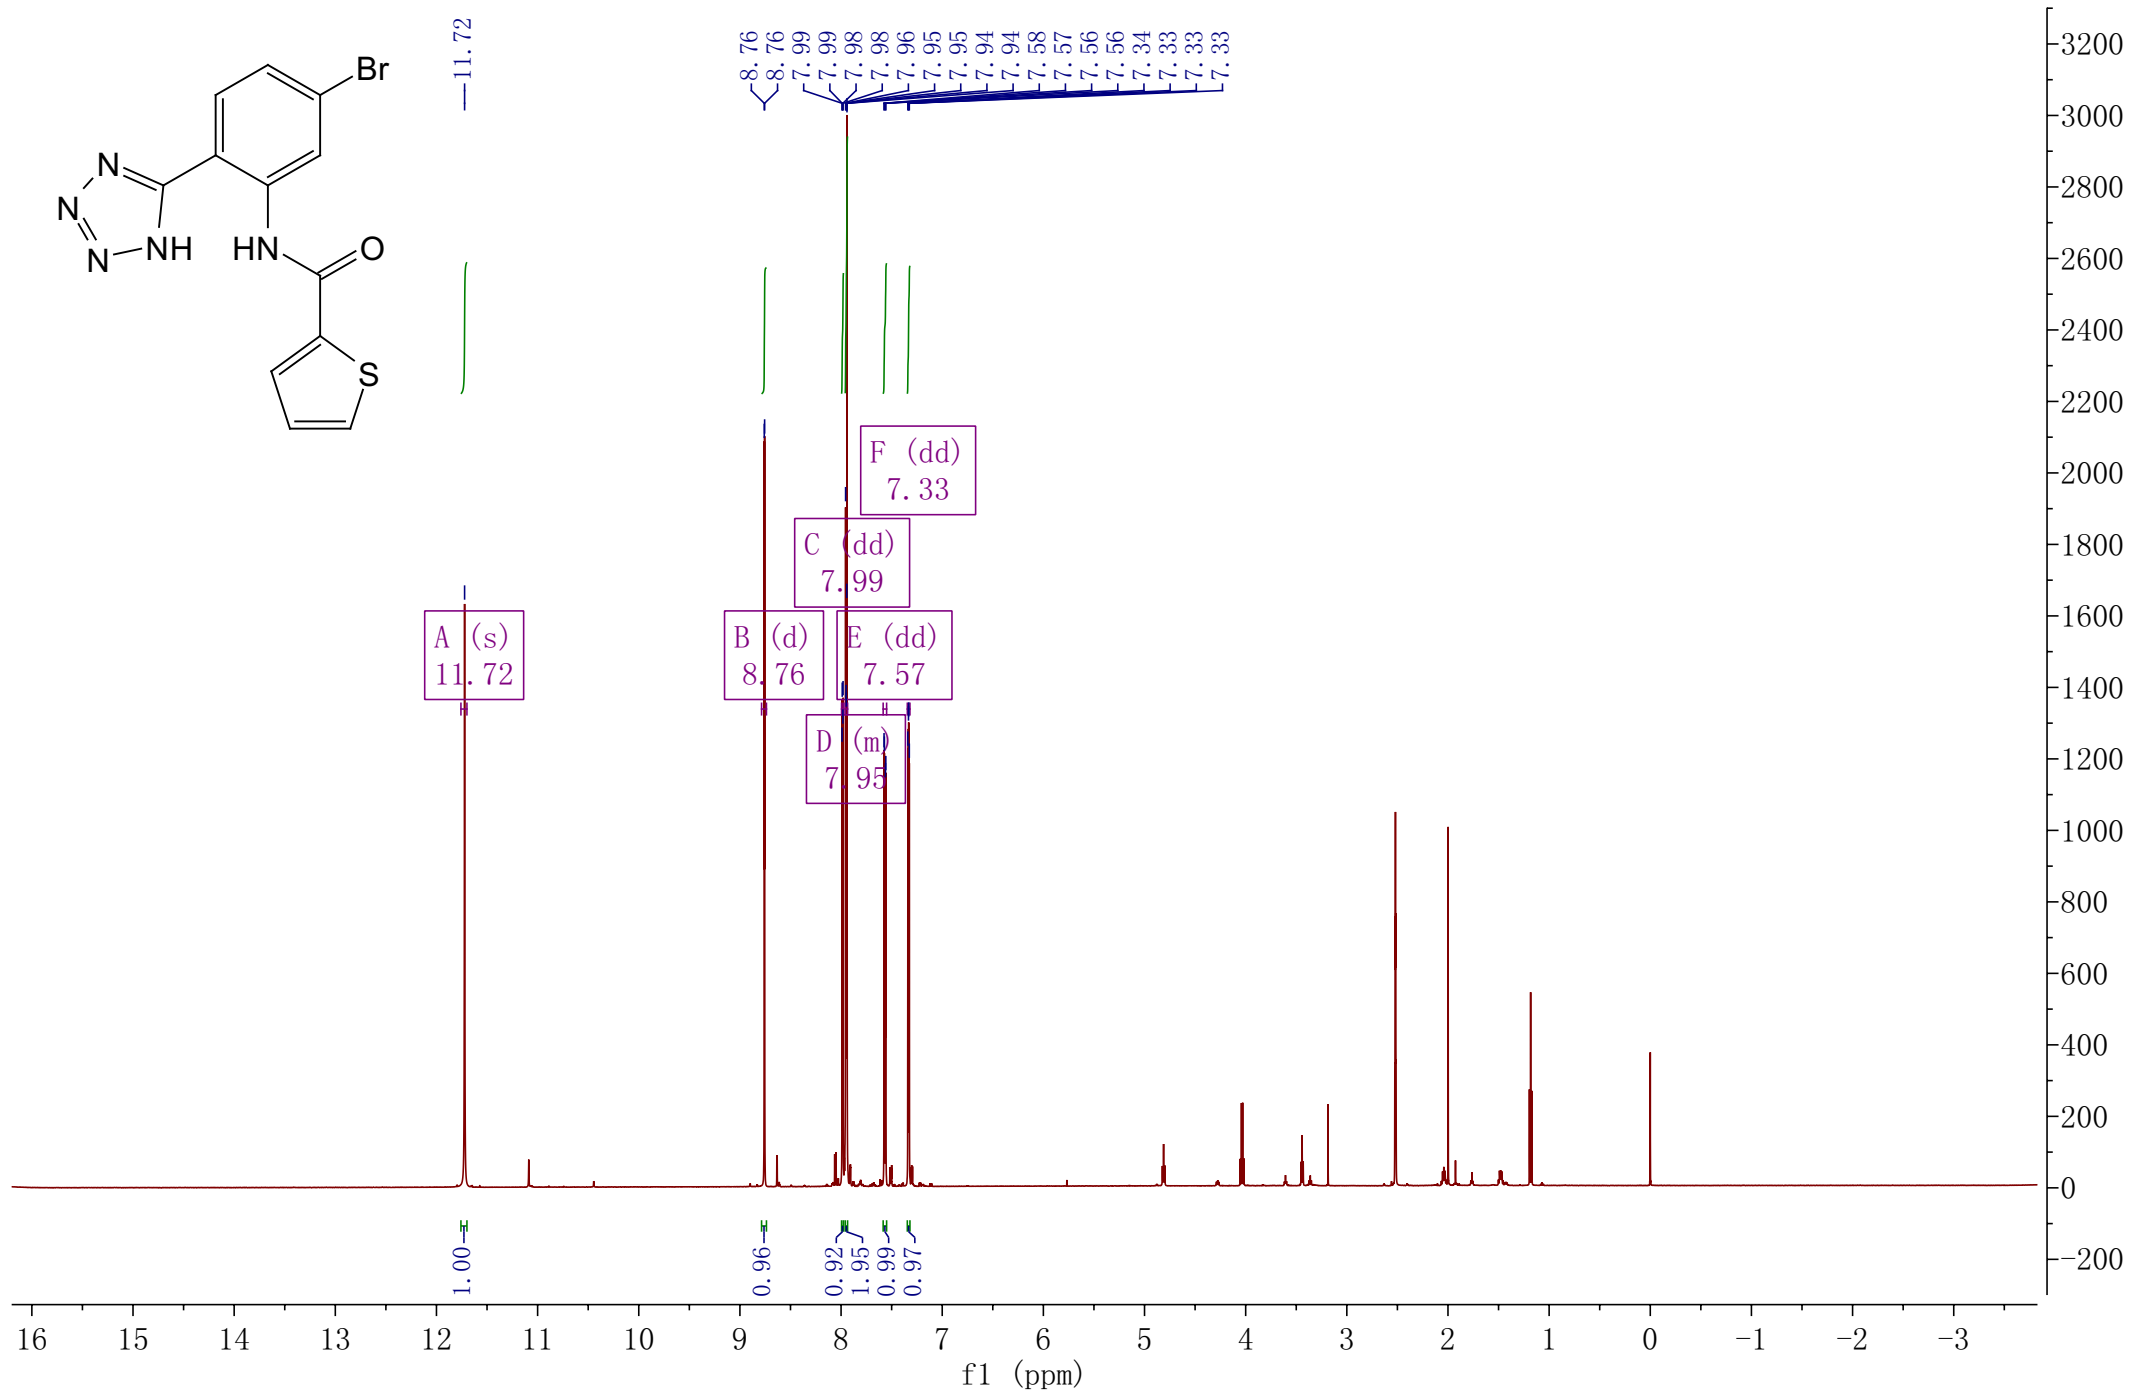

$^{13}\text{C}$  NMR (151 MHz, DMSO)  $\delta$  160.33, 155.00, 139.58, 138.44, 133.54, 130.59, 129.74, 128.99, 127.32, 125.42, 124.11, 112.68, 40.39, 40.25, 40.11, 39.97, 39.83, 39.70, 39.56

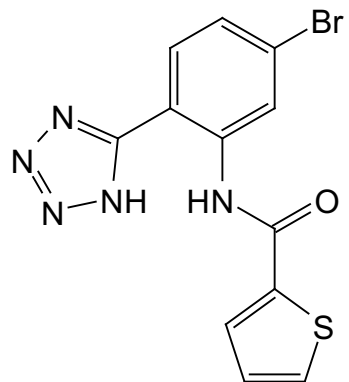

— 160.33  
— 155.00

139.58  
138.44  
133.54  
130.59  
129.74  
128.99  
127.32  
125.42  
124.11

— 112.68

40.39  
40.25  
40.11  
39.97  
39.83  
39.70  
39.56

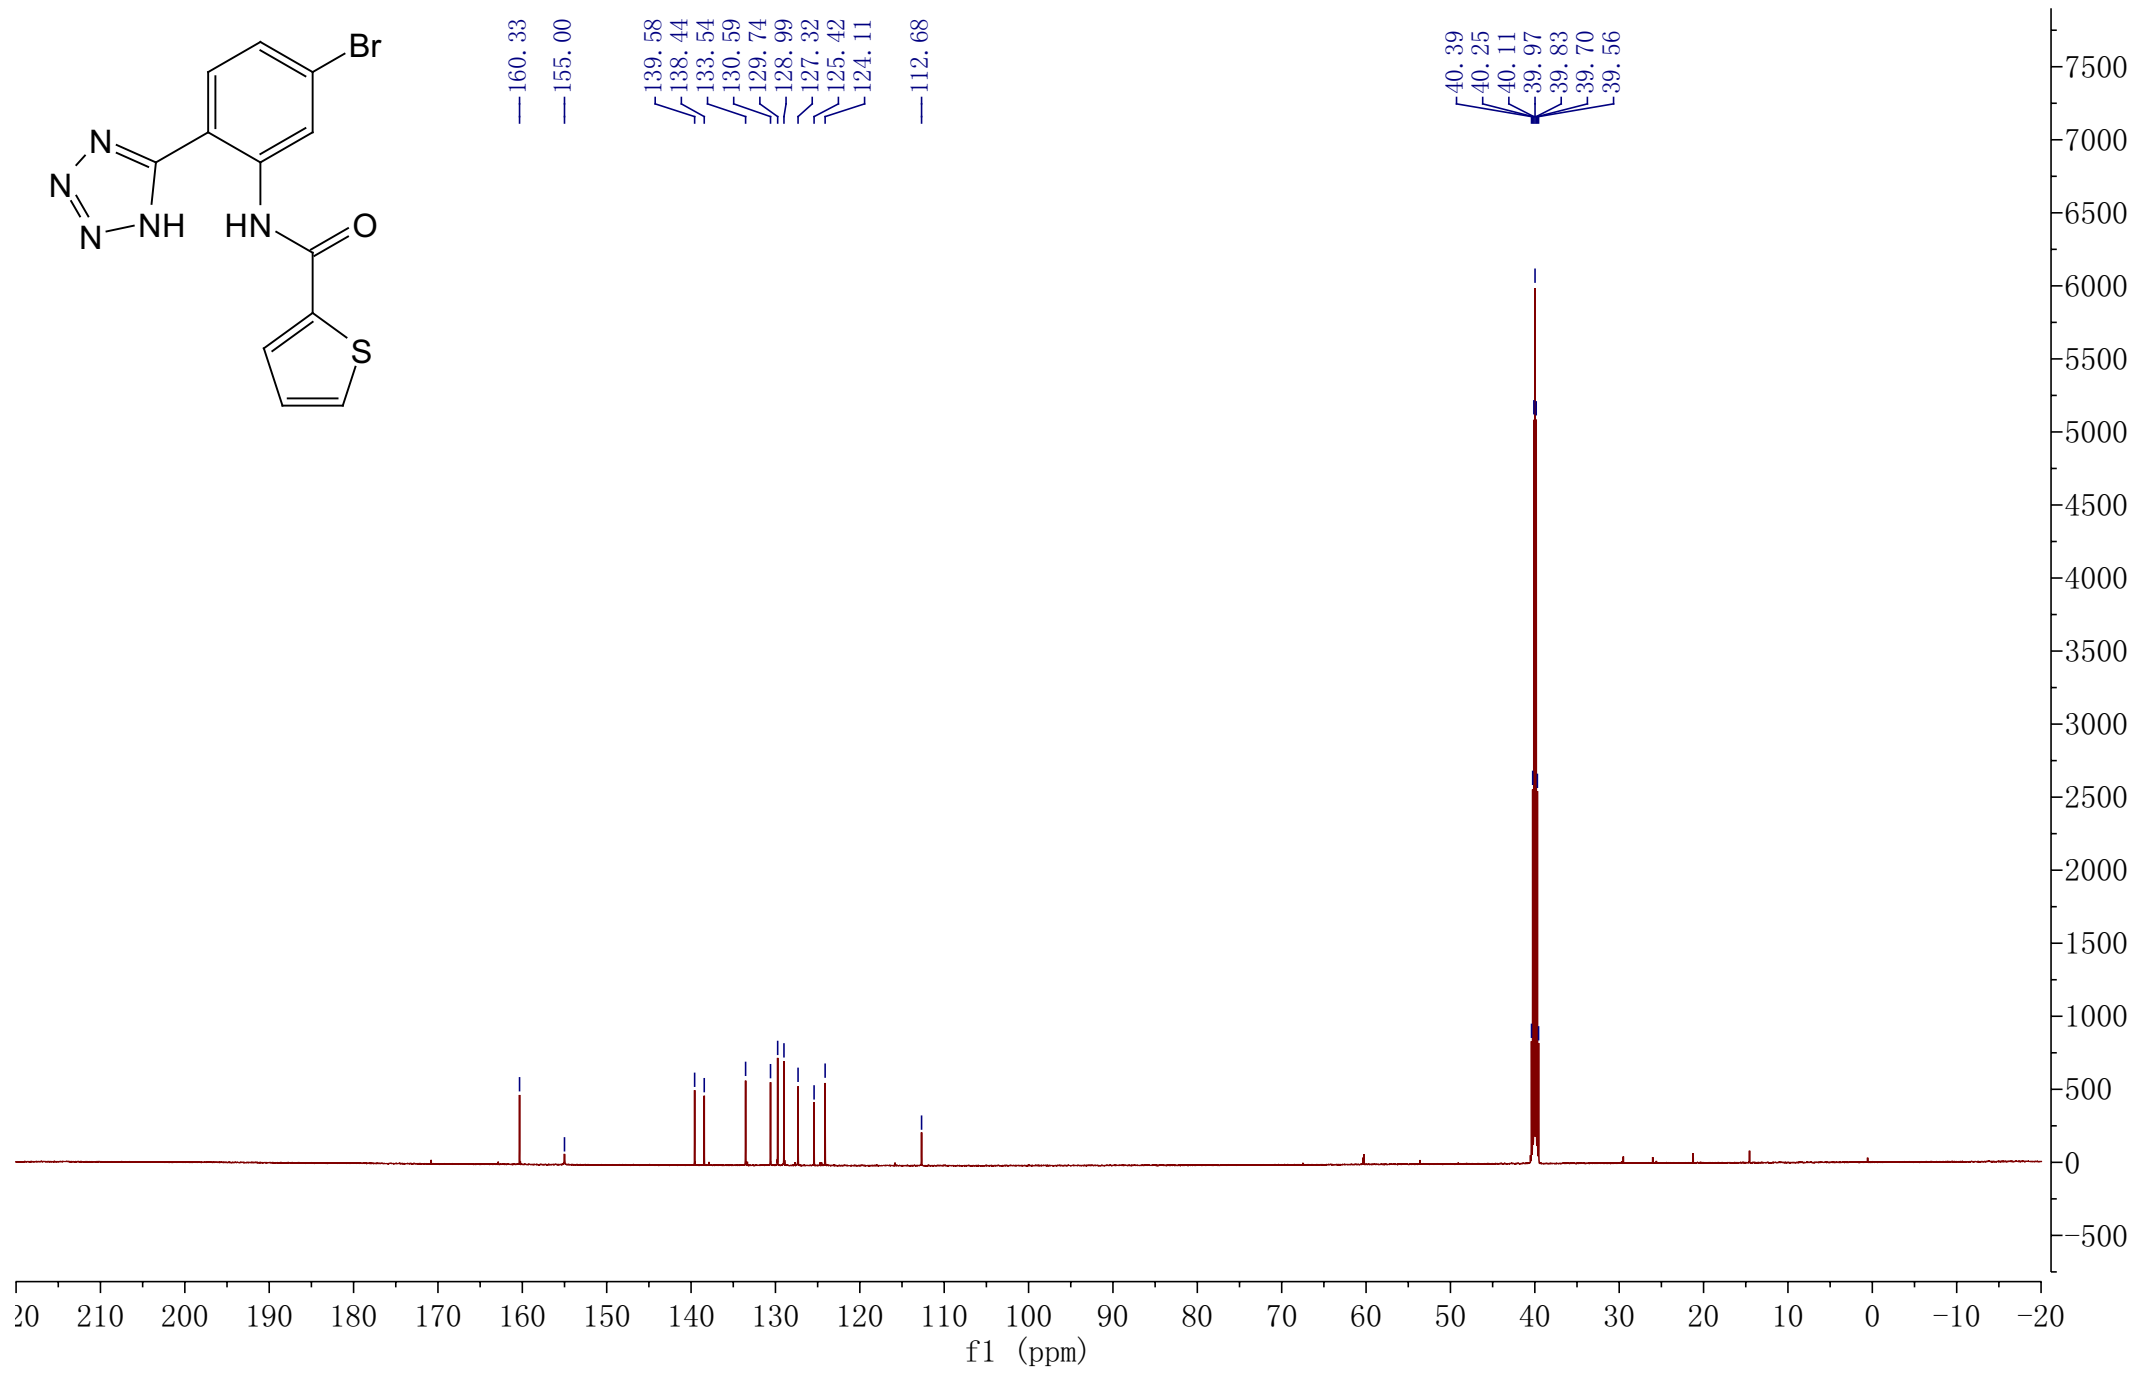

$^1\text{H}$  NMR (600 MHz, DMSO)  $\delta$  11.71 (s, 1H), 8.88 (d,  $J = 1.4$  Hz, 1H), 8.06 (d,  $J = 7.4$  Hz, 2H), 7.96 (d,  $J = 8.4$  Hz, 1H), 7.68 (t,  $J = 7.2$  Hz, 1H), 7.63 (t,  $J = 7.5$  Hz, 2H), 7.59 (dd,  $J = 8.4, 1.5$  Hz, 1H).

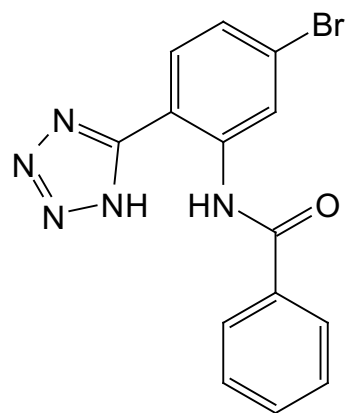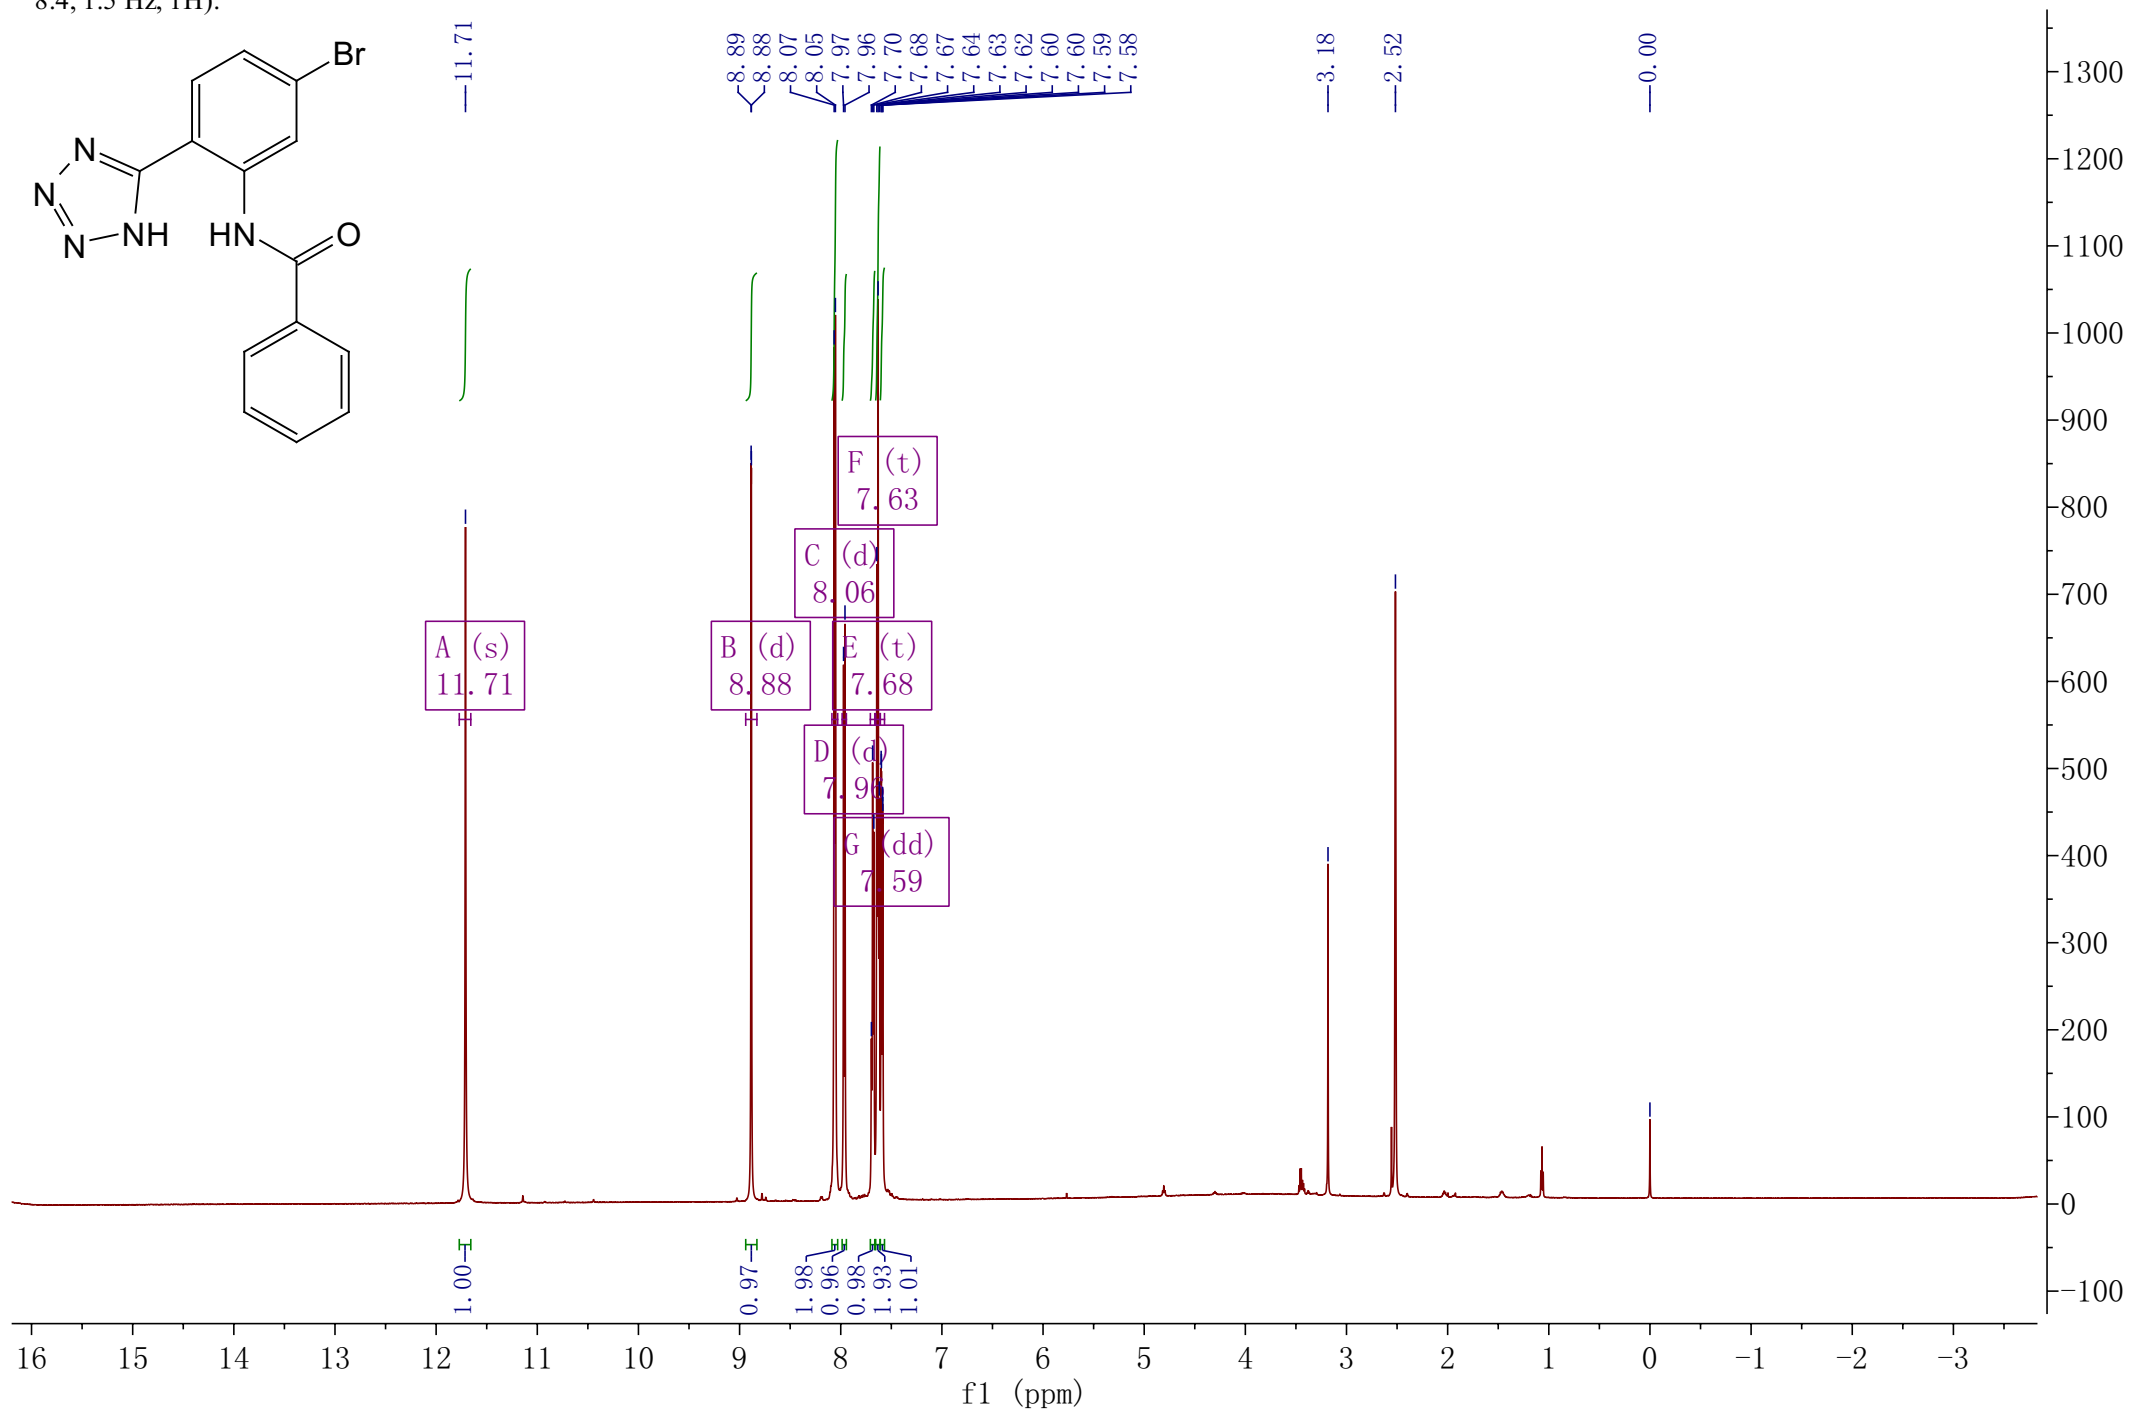

$^{13}\text{C}$  NMR (151 MHz, DMSO)  $\delta$  165.70, 155.04, 138.77, 134.44, 132.93, 130.63, 129.43, 127.83, 127.37, 125.42, 124.33, 112.96, 40.39, 40.25, 40.11, 39.87, 39.83, 39.69, 39.55.

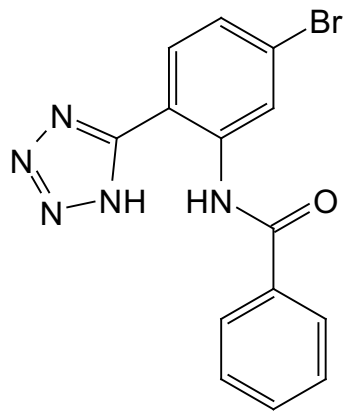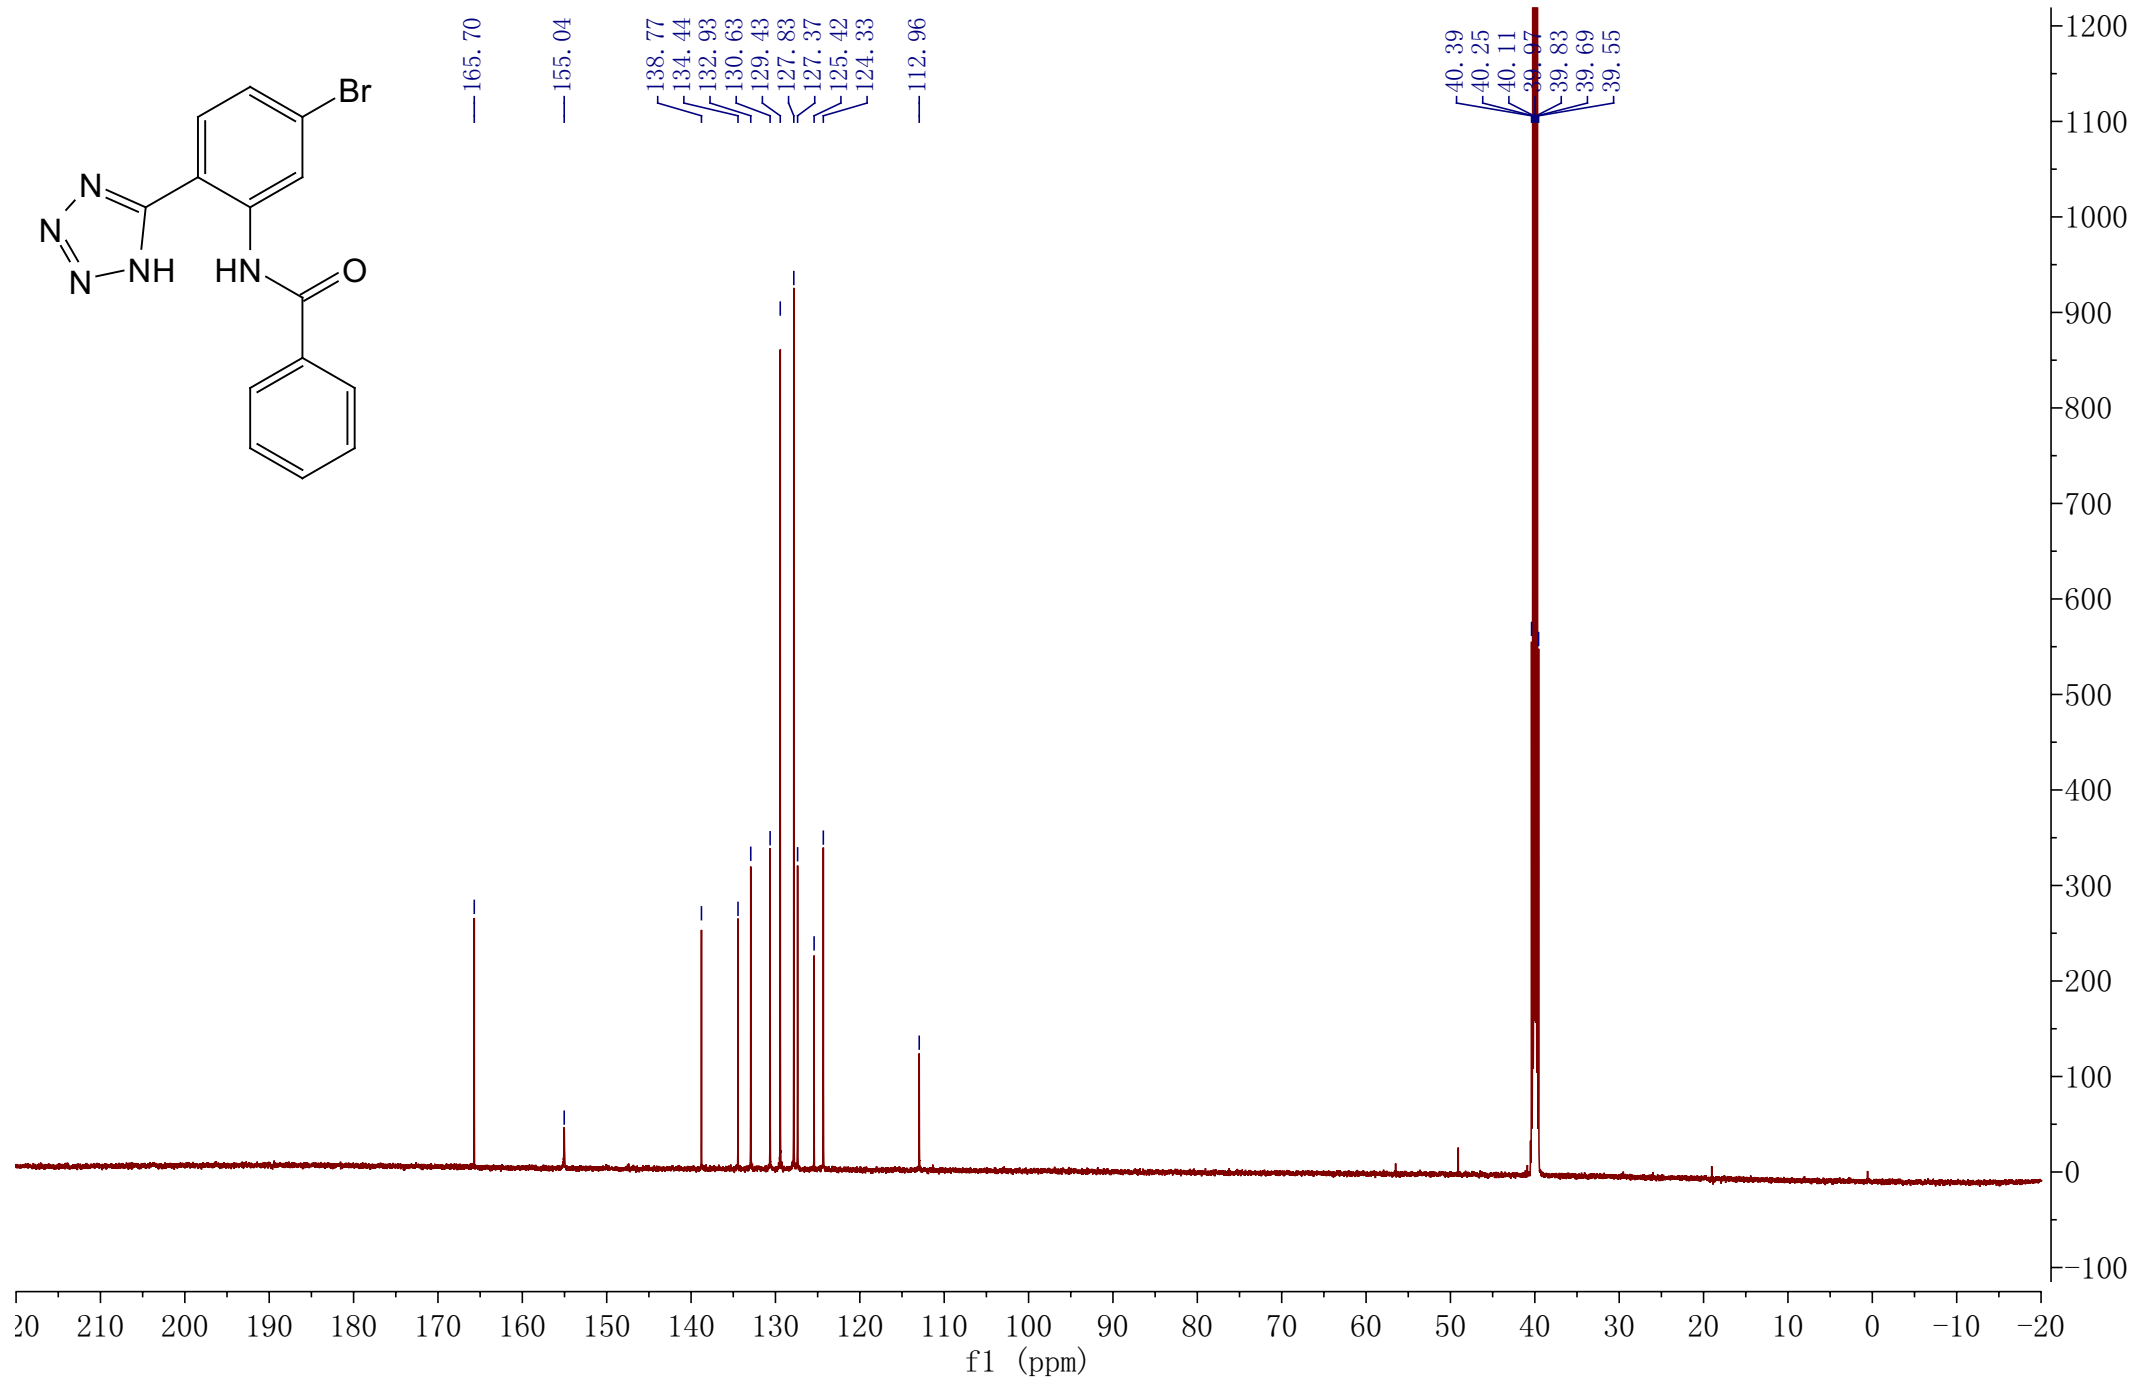



$^1\text{H}$  NMR (600 MHz, DMSO)  $\delta$  11.24 (s, 1H), 8.78 (d,  $J = 1.9$  Hz, 1H), 7.92 (d,  $J = 8.4$  Hz, 1H), 7.68 (dd,  $J = 6.7, 5.7$  Hz, 1H), 7.62 (dd,  $J = 8.4, 2.0$  Hz, 1H), 7.46 (td,  $J = 7.5, 1.3$  Hz, 1H), 7.41 – 7.33 (m, 2H), 2.44 (s, 3H).

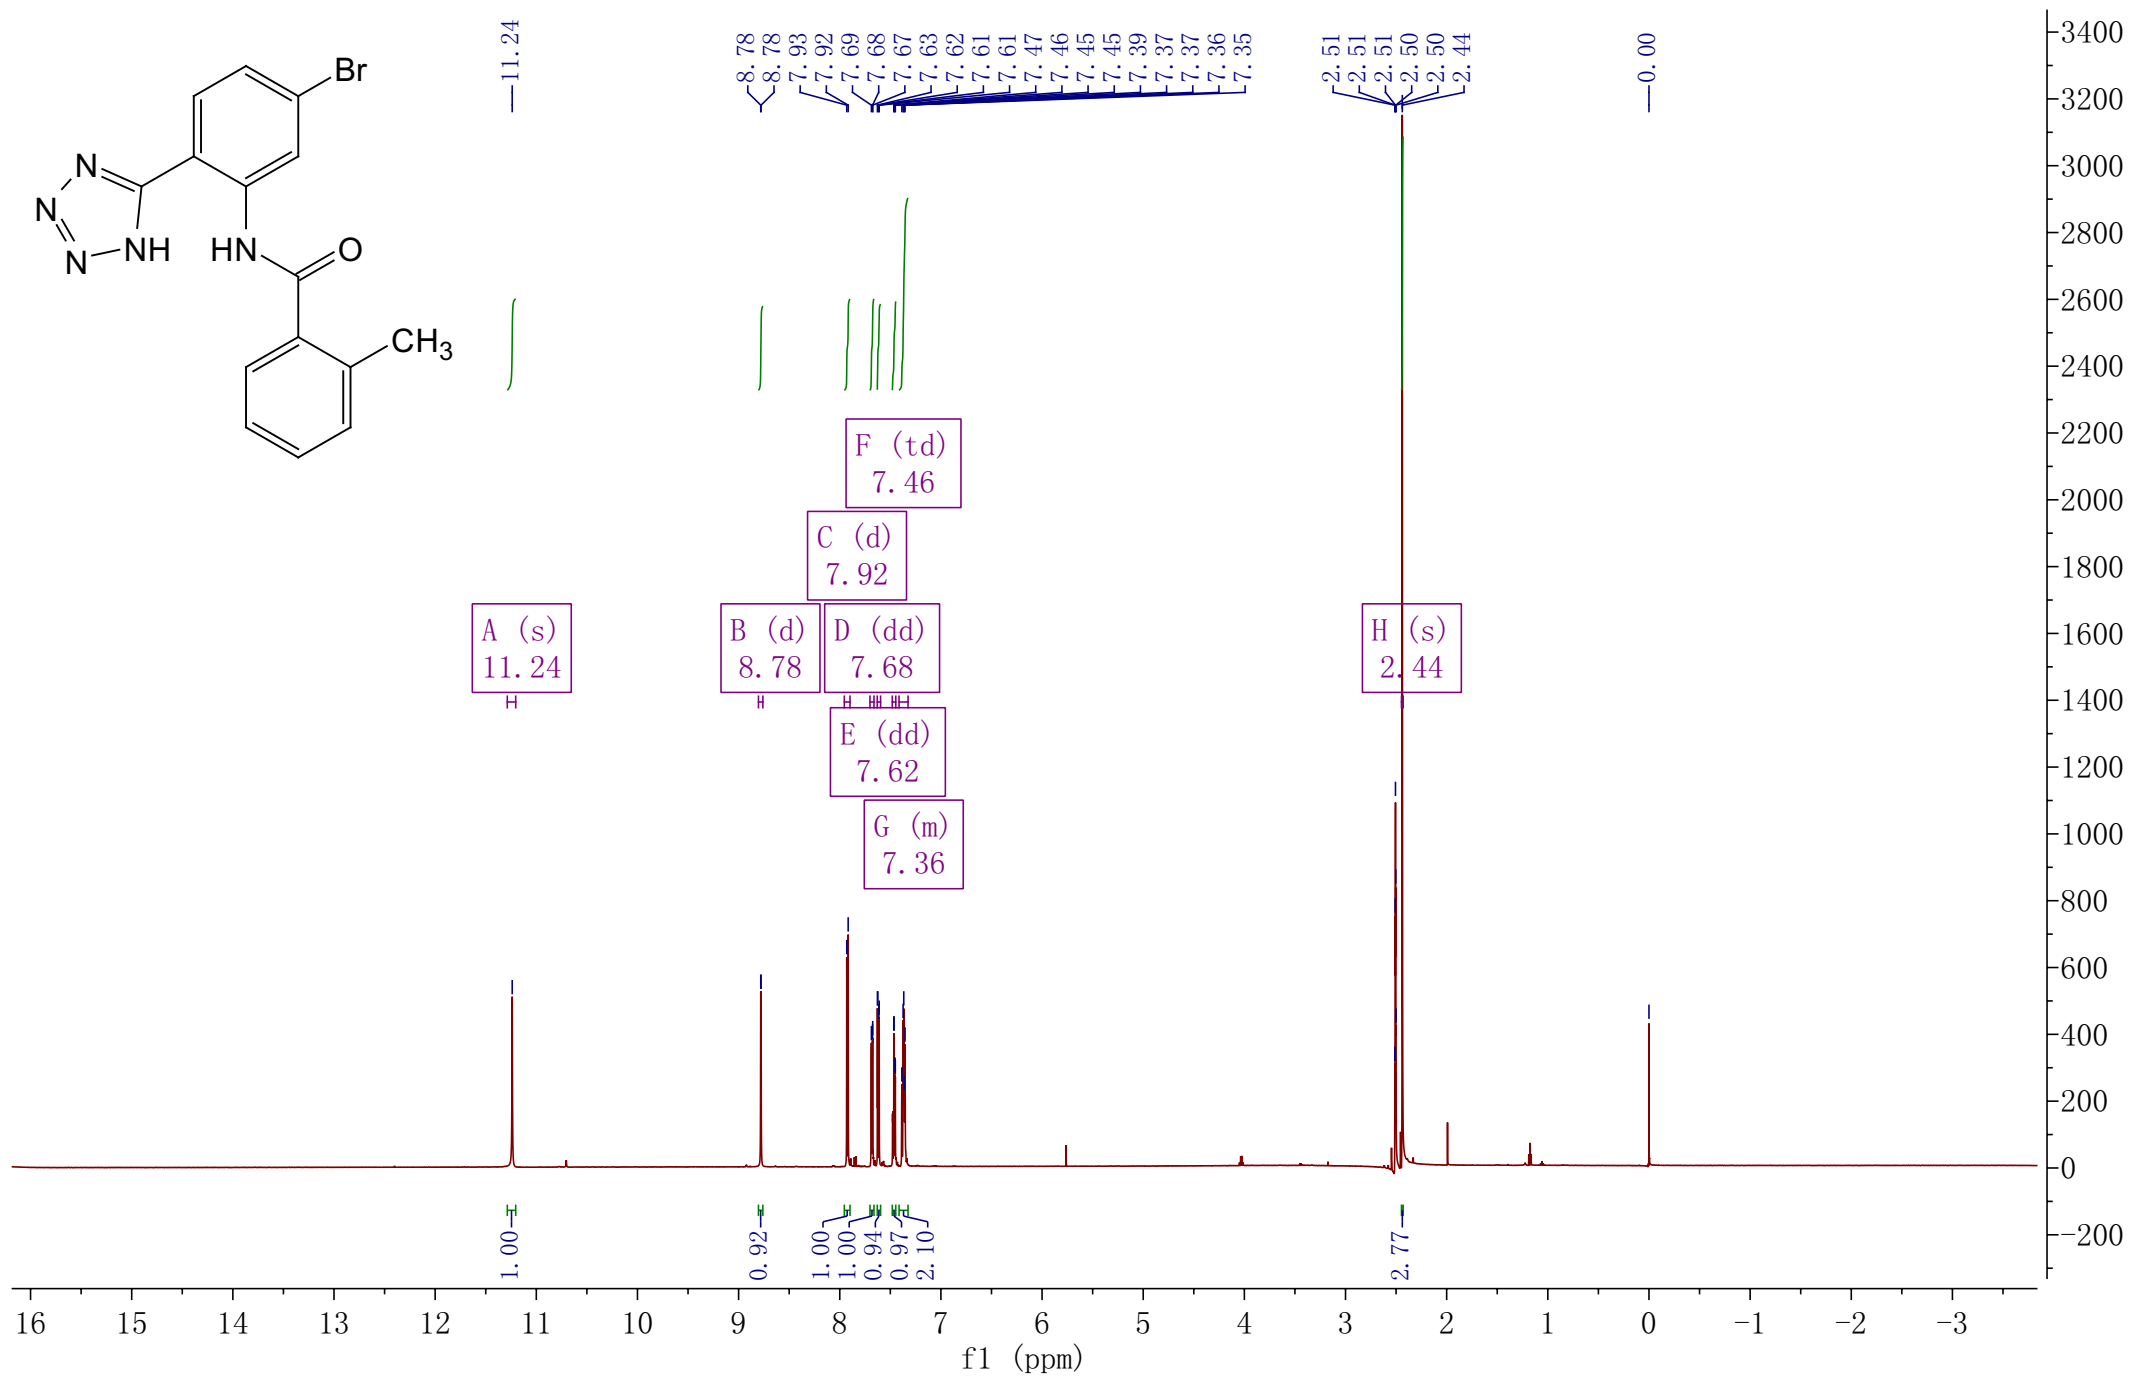

$^{13}\text{C}$  NMR (151 MHz, DMSO)  $\delta$  167.12, 153.84, 137.64, 135.76, 135.13, 130.58, 130.01, 129.82, 126.57, 126.52, 125.45, 124.18, 123.62, 112.66, 39.32, 39.18, 39.04, 38.90, 38.76, 38.63, 38.49, 19.02.

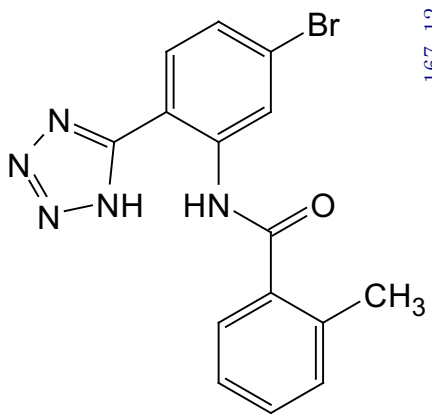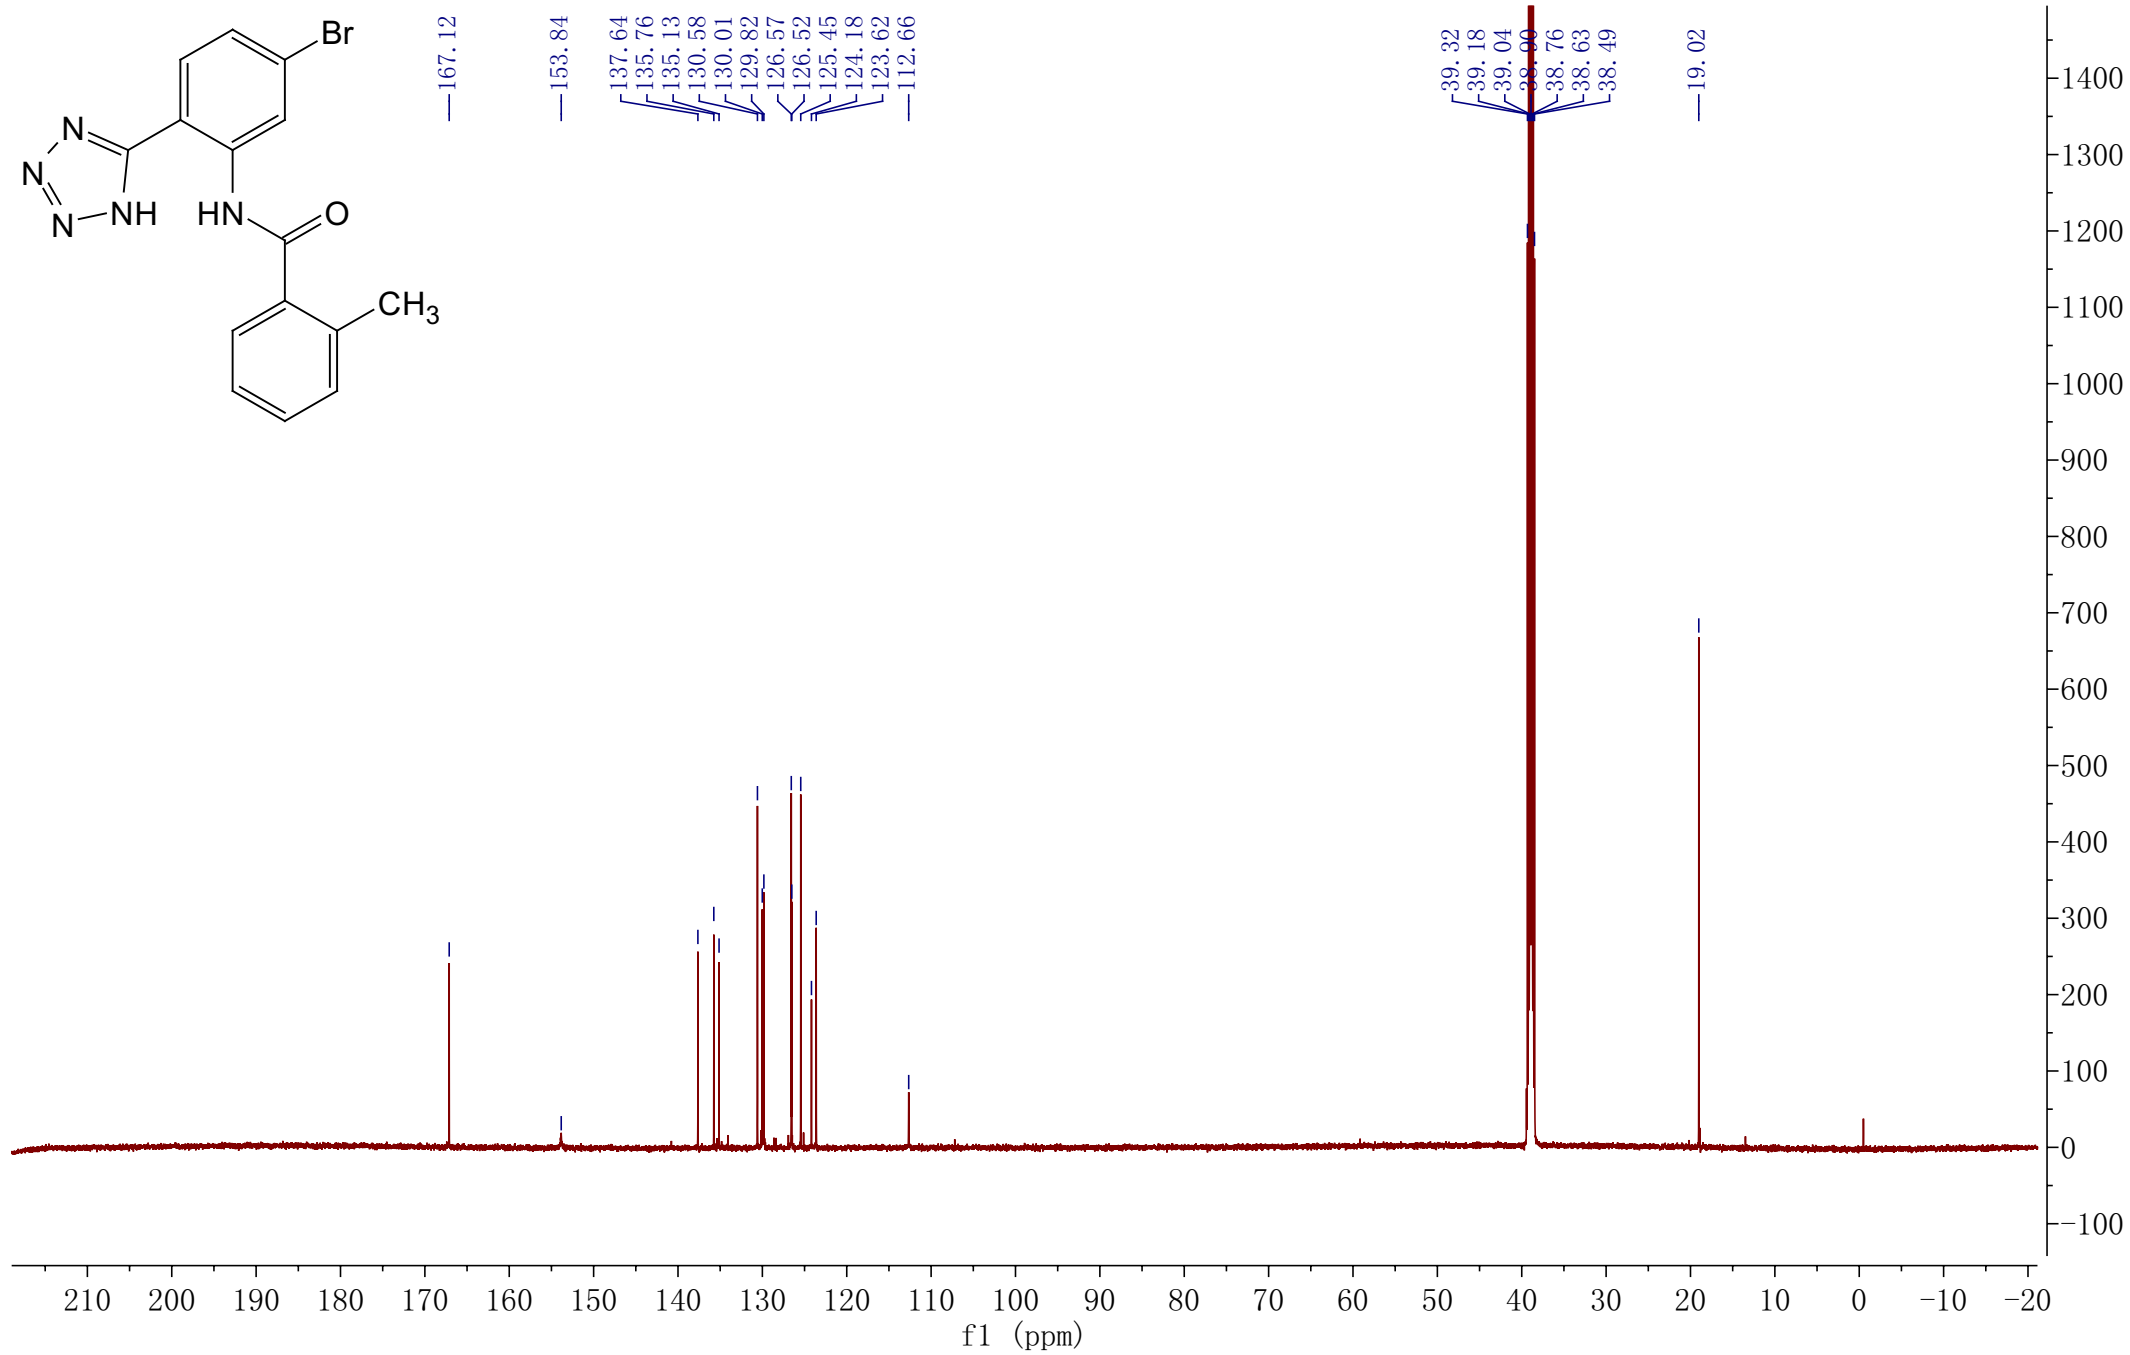

$^1\text{H}$  NMR (600 MHz, DMSO)  $\delta$  11.67 (s, 1H), 8.87 (d,  $J = 2.0$  Hz, 1H), 7.95 (d,  $J = 8.4$  Hz, 1H), 7.87 – 7.83 (m, 2H), 7.58 (dd,  $J = 8.4, 2.0$  Hz, 1H), 7.53 – 7.46 (m, 2H).

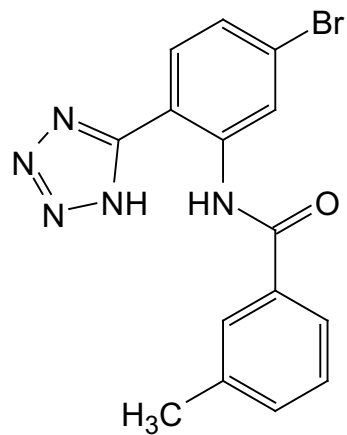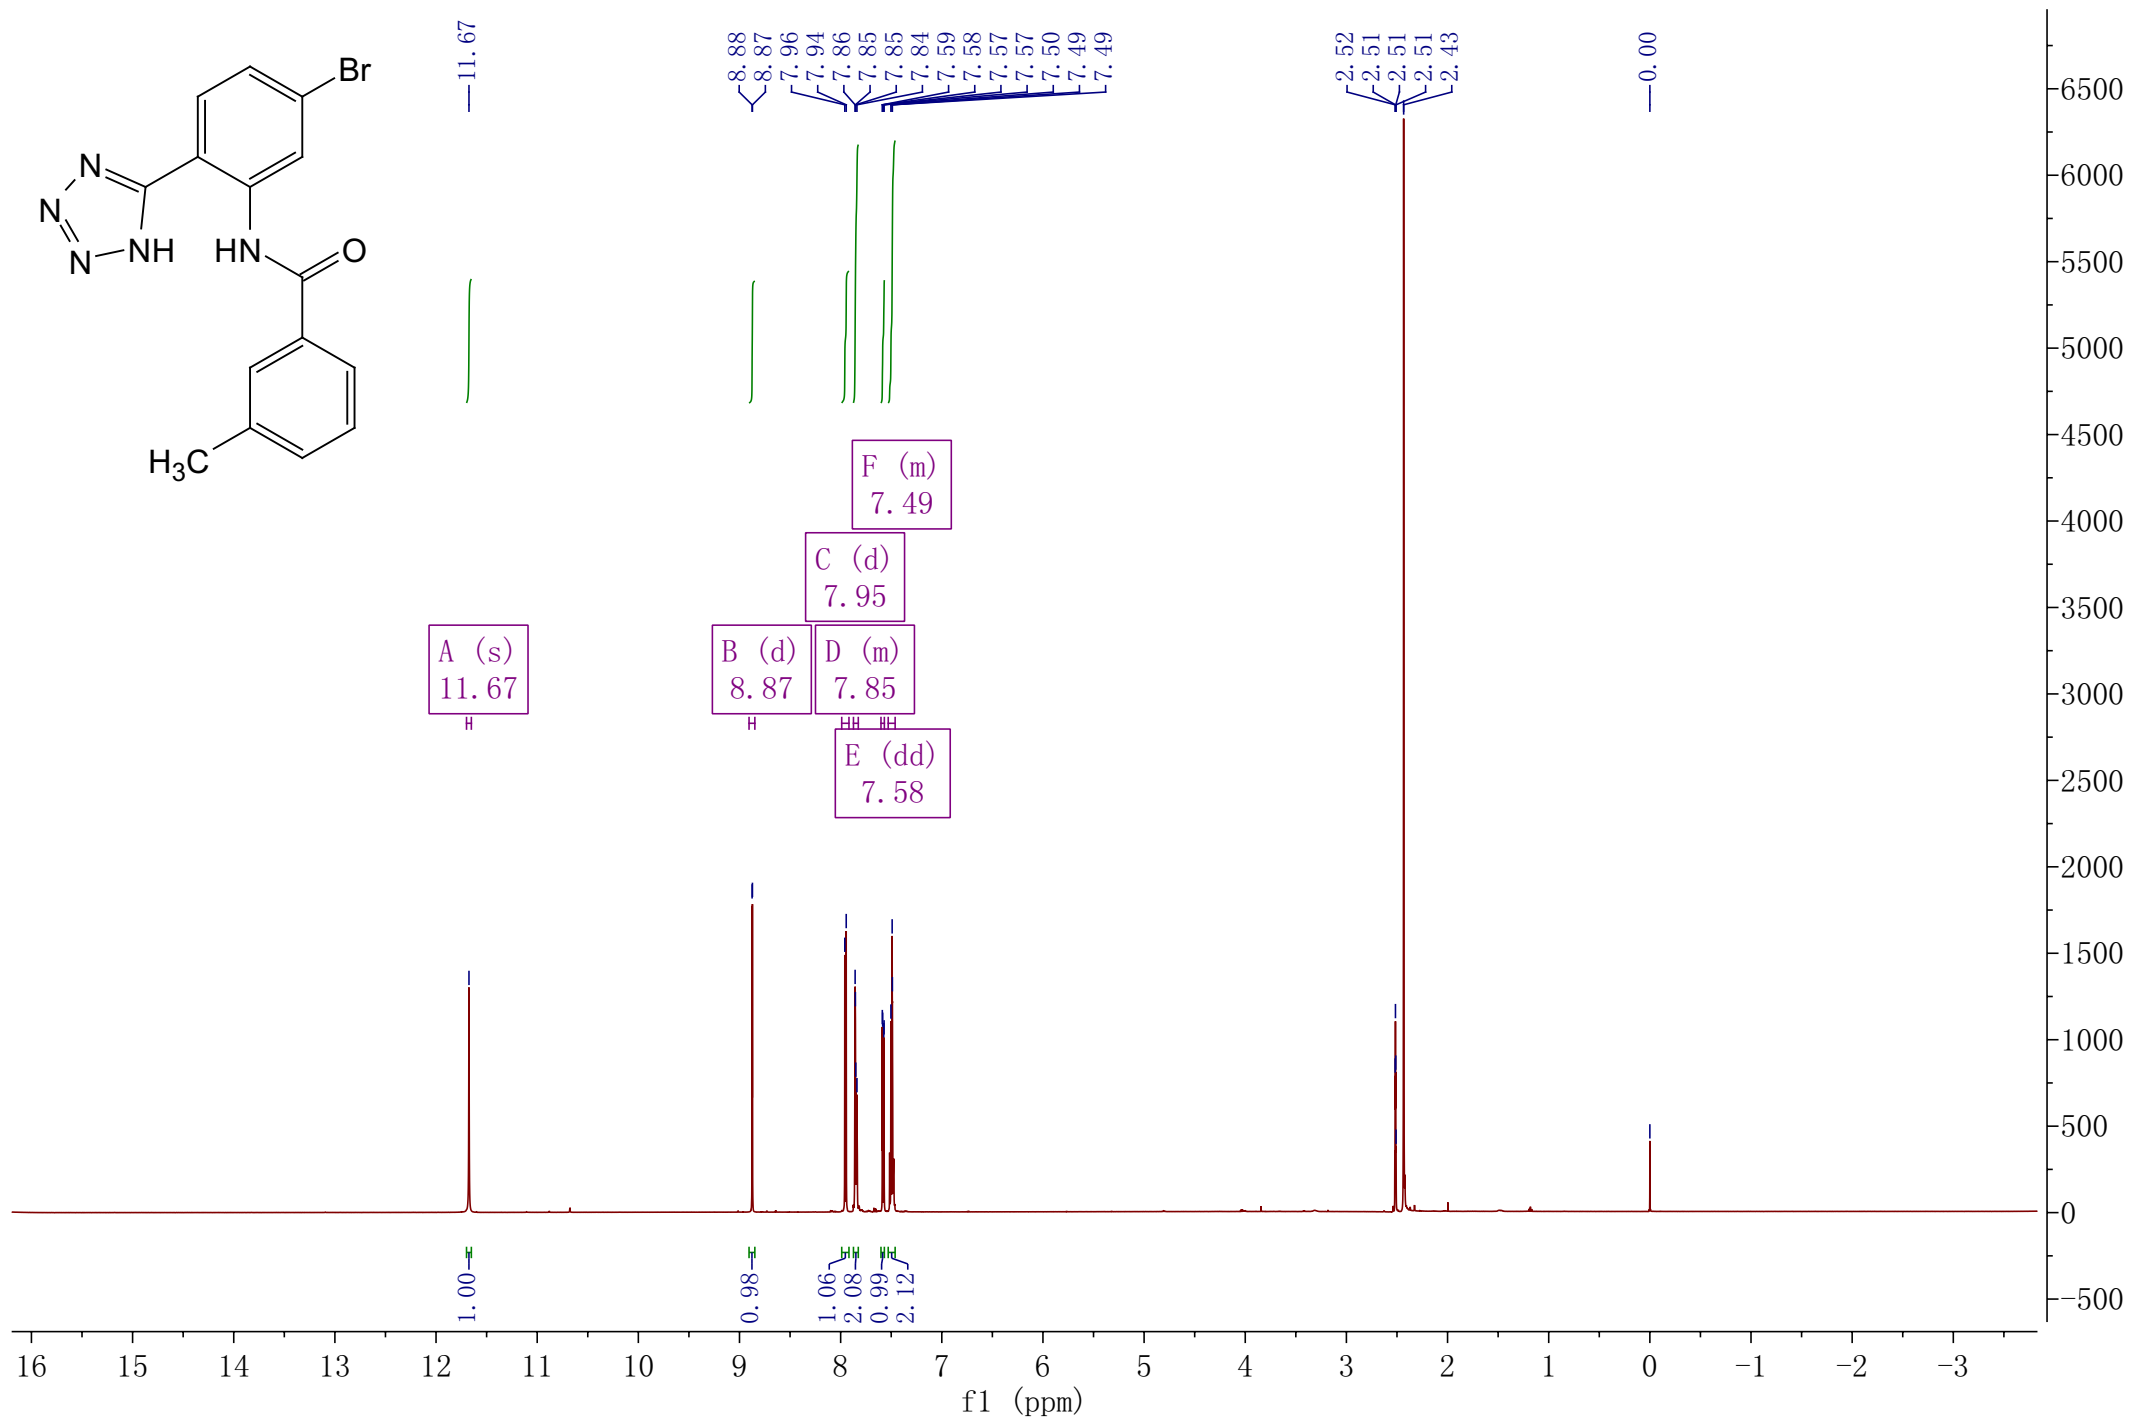

$^{13}\text{C}$  NMR (151 MHz, DMSO)  $\delta$  165.76, 155.02, 138.82, 138.79, 134.41, 133.49, 130.60, 129.28, 128.48, 127.28, 125.45, 124.85, 124.22, 112.80, 21.50.

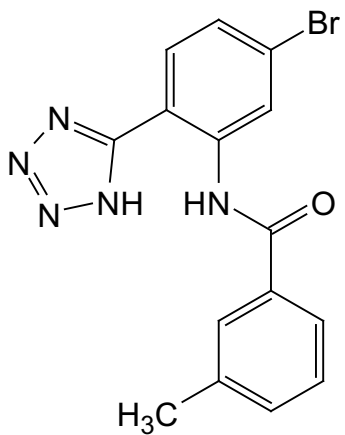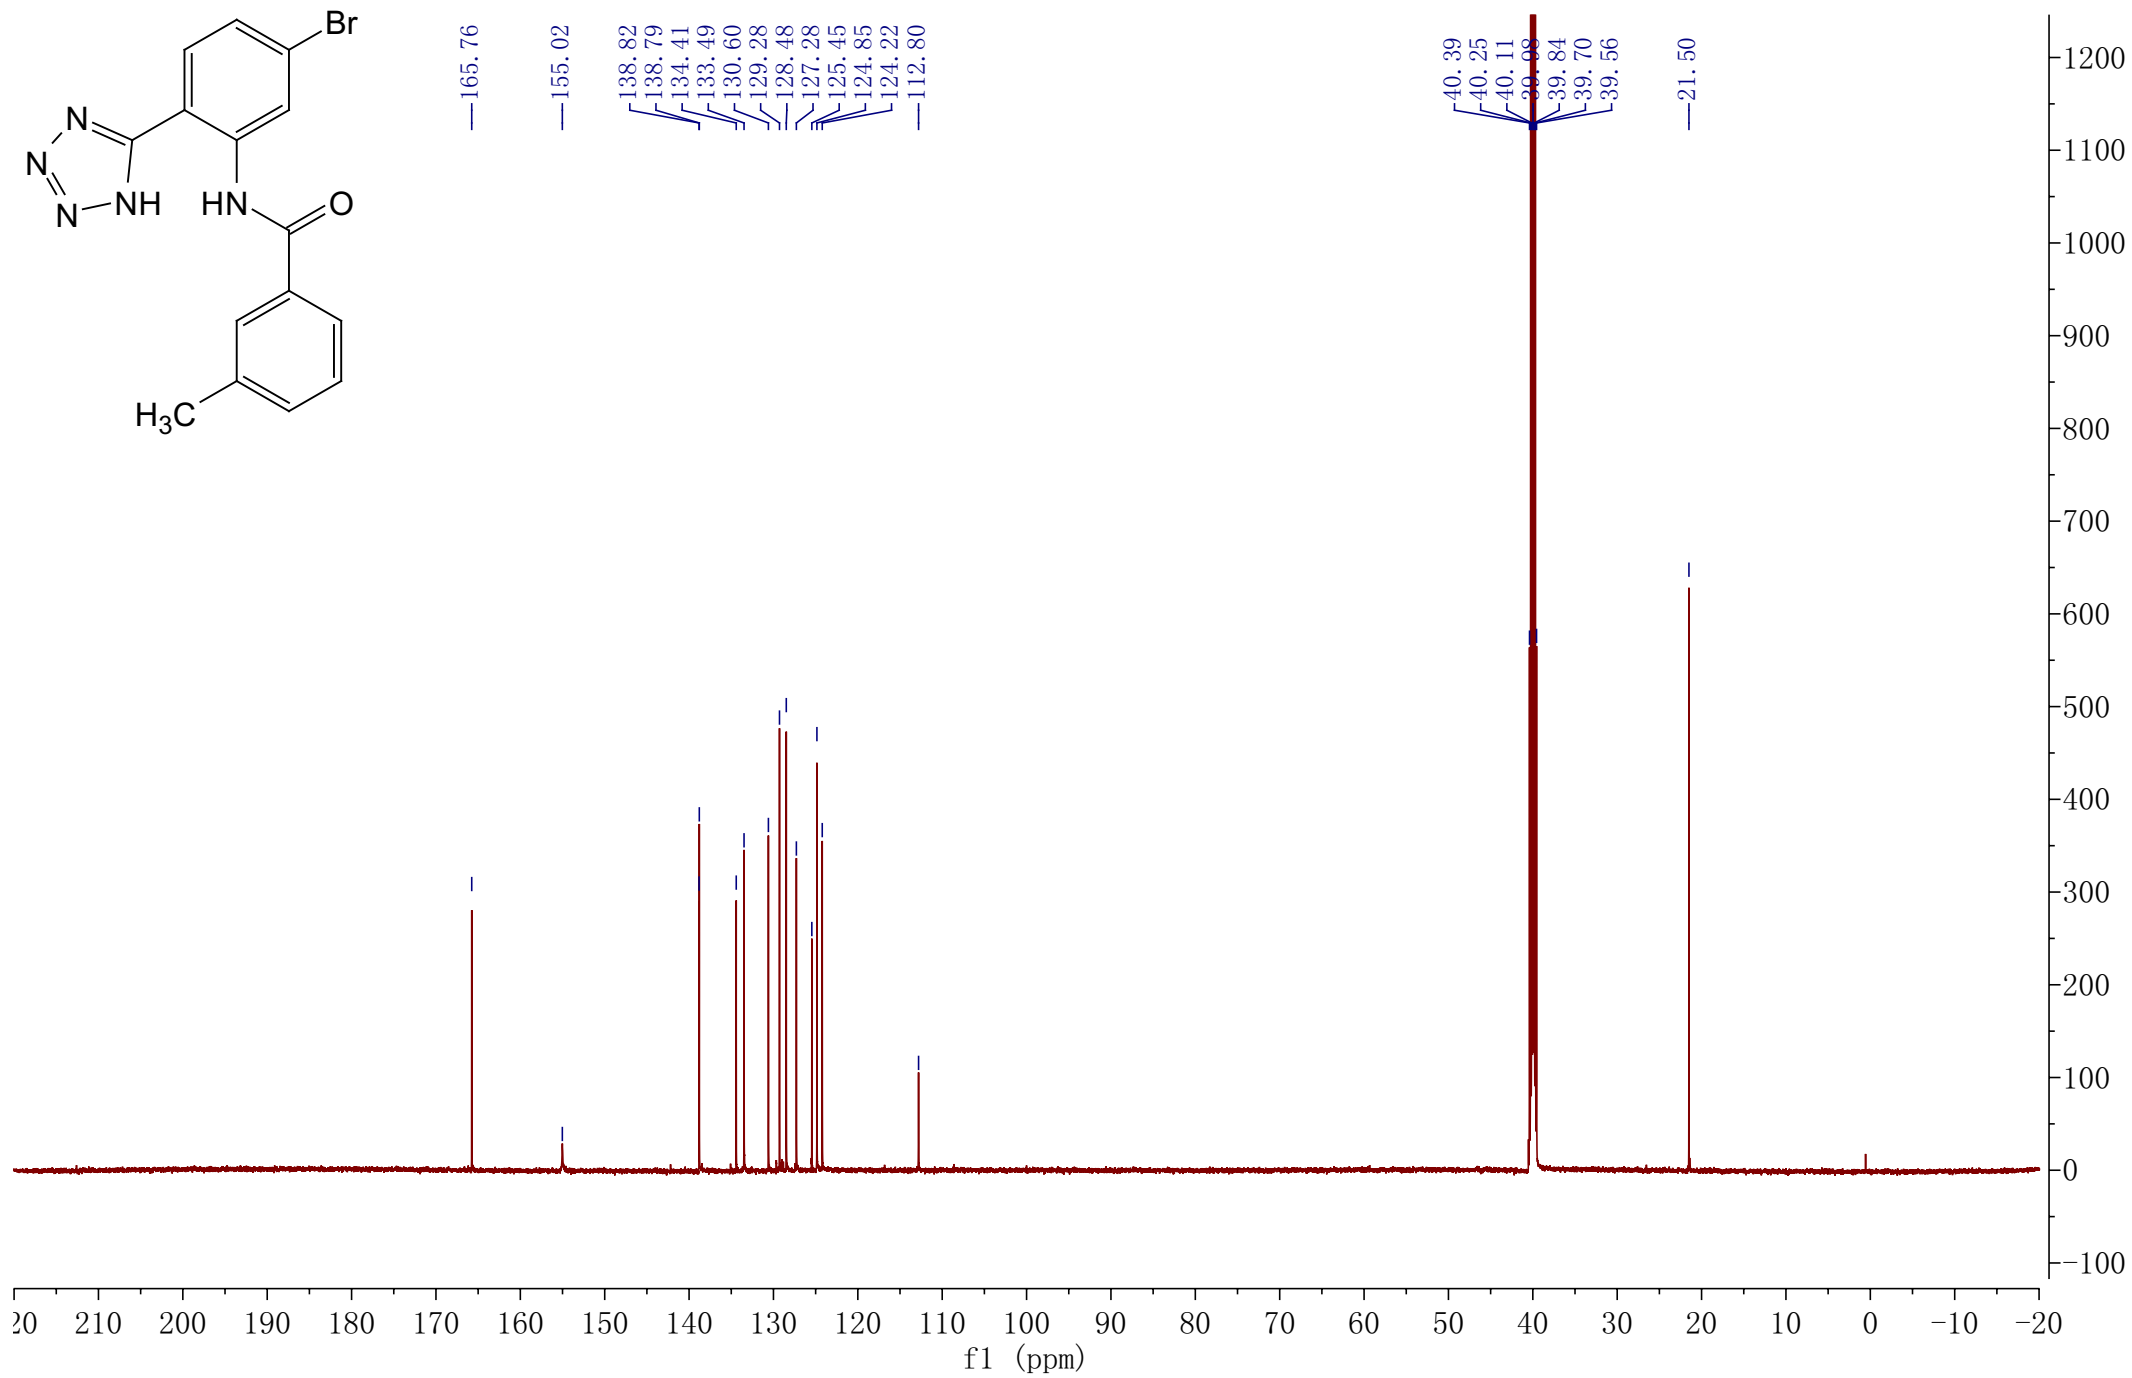

$^1\text{H}$  NMR (600 MHz, DMSO)  $\delta$  11.40 (s, 1H), 8.71 (s, 1H), 7.96 (d,  $J = 8.4$  Hz, 1H), 7.78 (dd,  $J = 7.5, 1.4$  Hz, 1H), 7.63 (ddd,  $J = 11.1, 5.7, 2.9$  Hz, 2H), 7.59 (td,  $J = 7.7, 1.7$  Hz, 1H), 7.54 (td,  $J = 7.4, 1.2$  Hz, 1H).

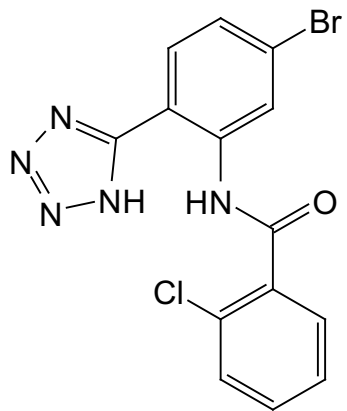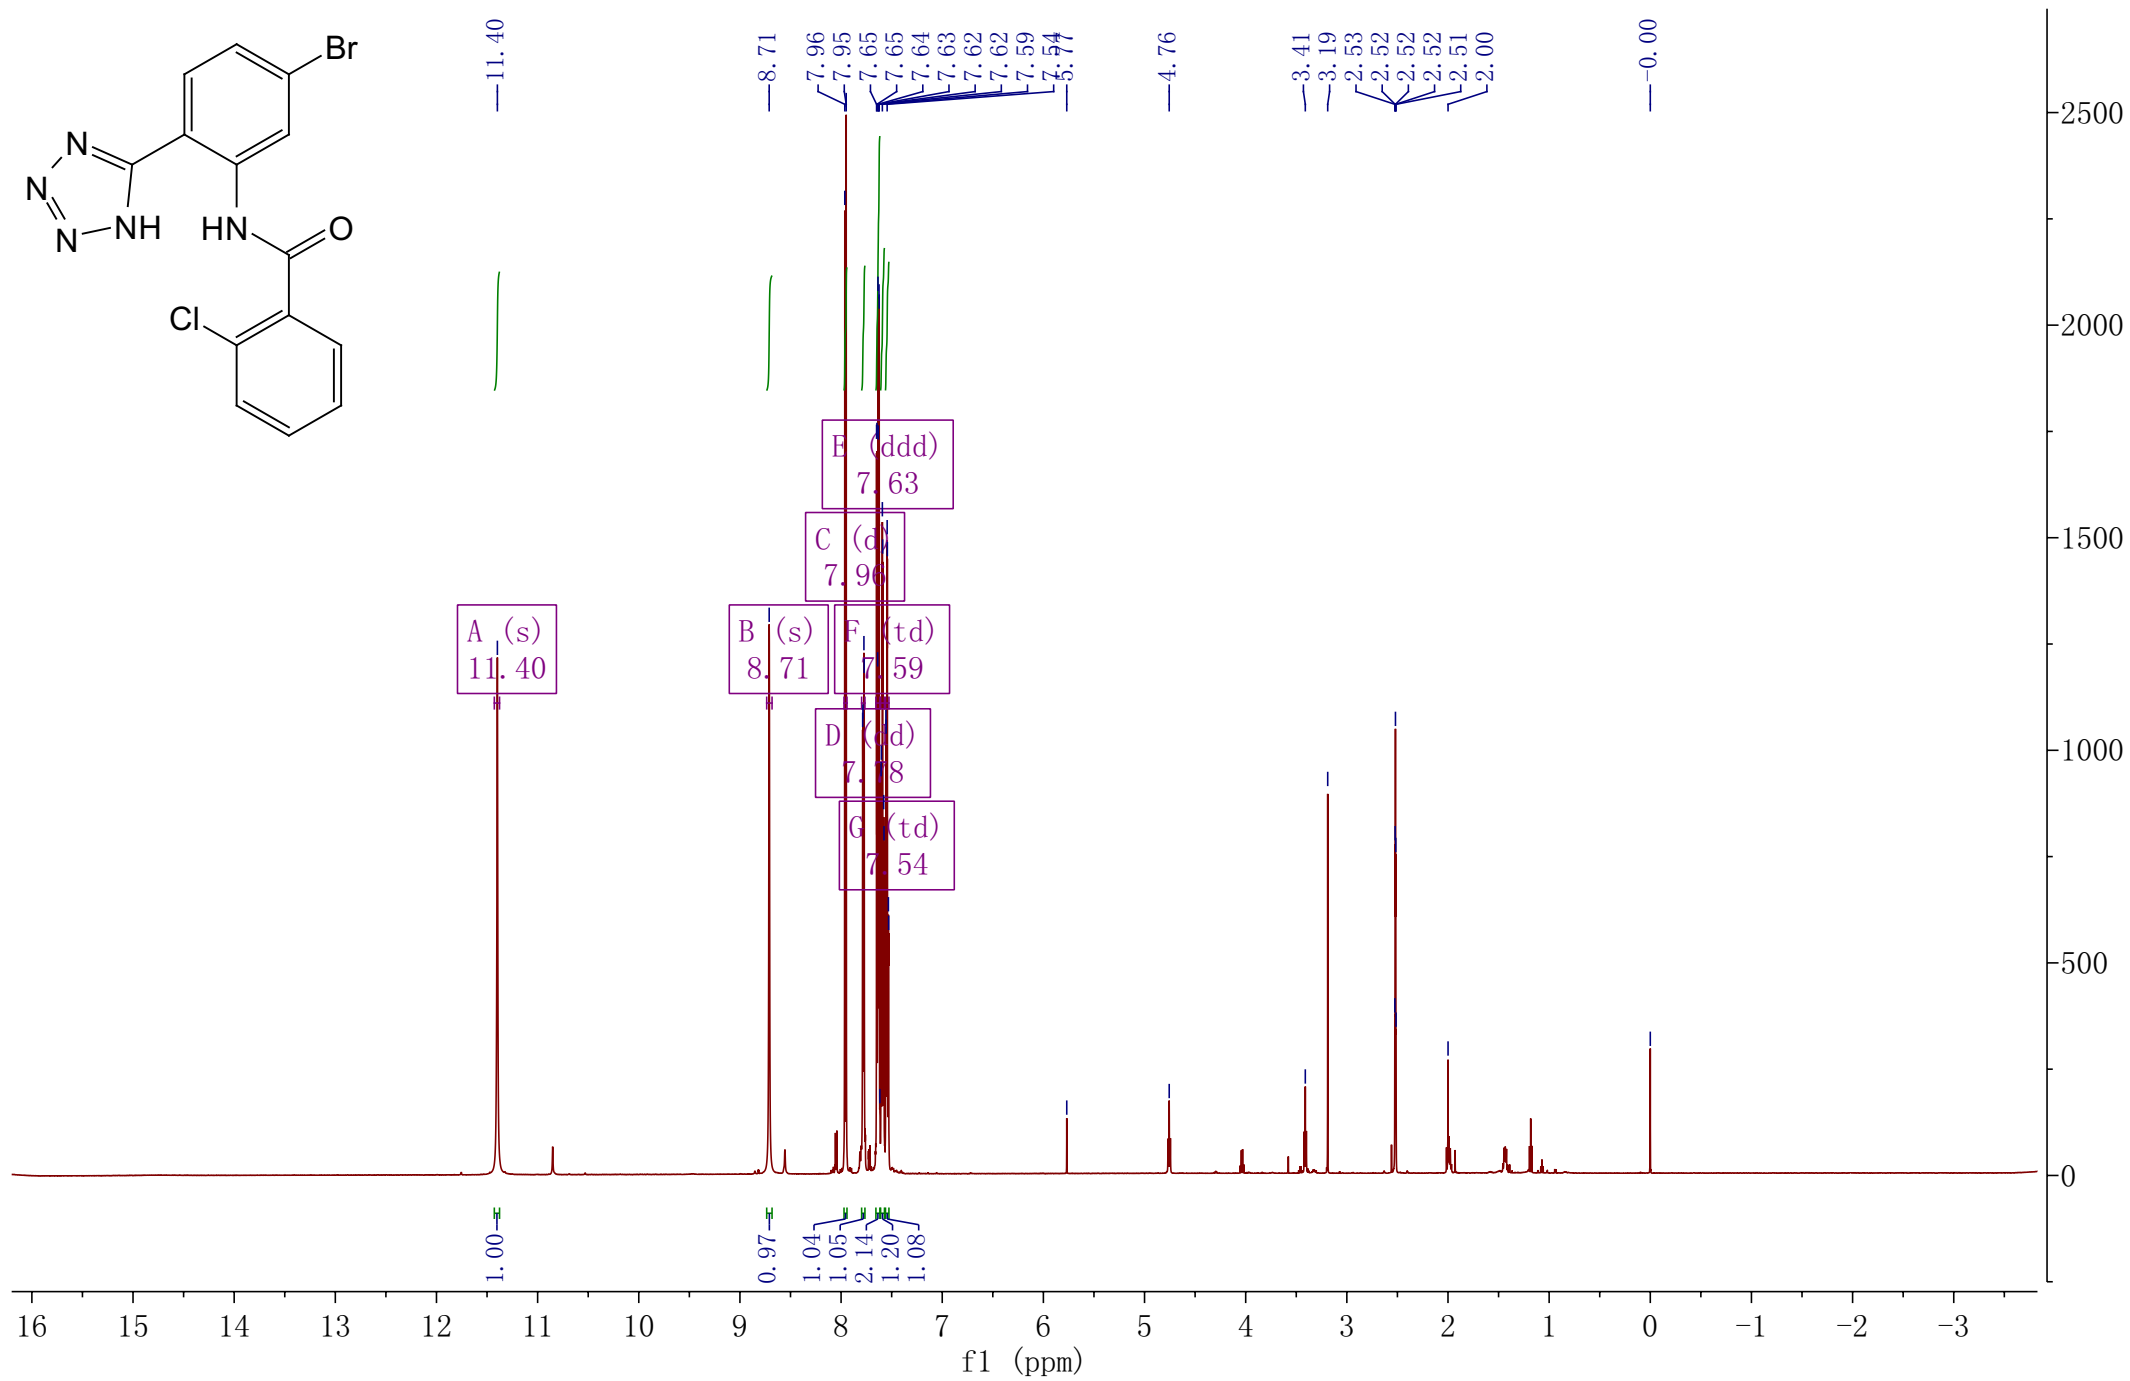

$^{13}\text{C}$  NMR (151 MHz, DMSO)  $\delta$  165.44, 155.01, 138.12, 136.13, 132.47, 130.98, 130.69, 130.64, 129.53, 128.04, 125.04, 124.86, 114.46, 40.39, 40.25, 40.11, 39.97, 39.83, 39.69, 39.55.

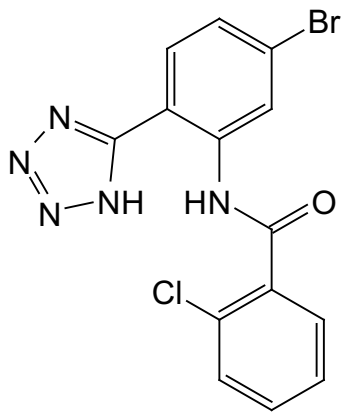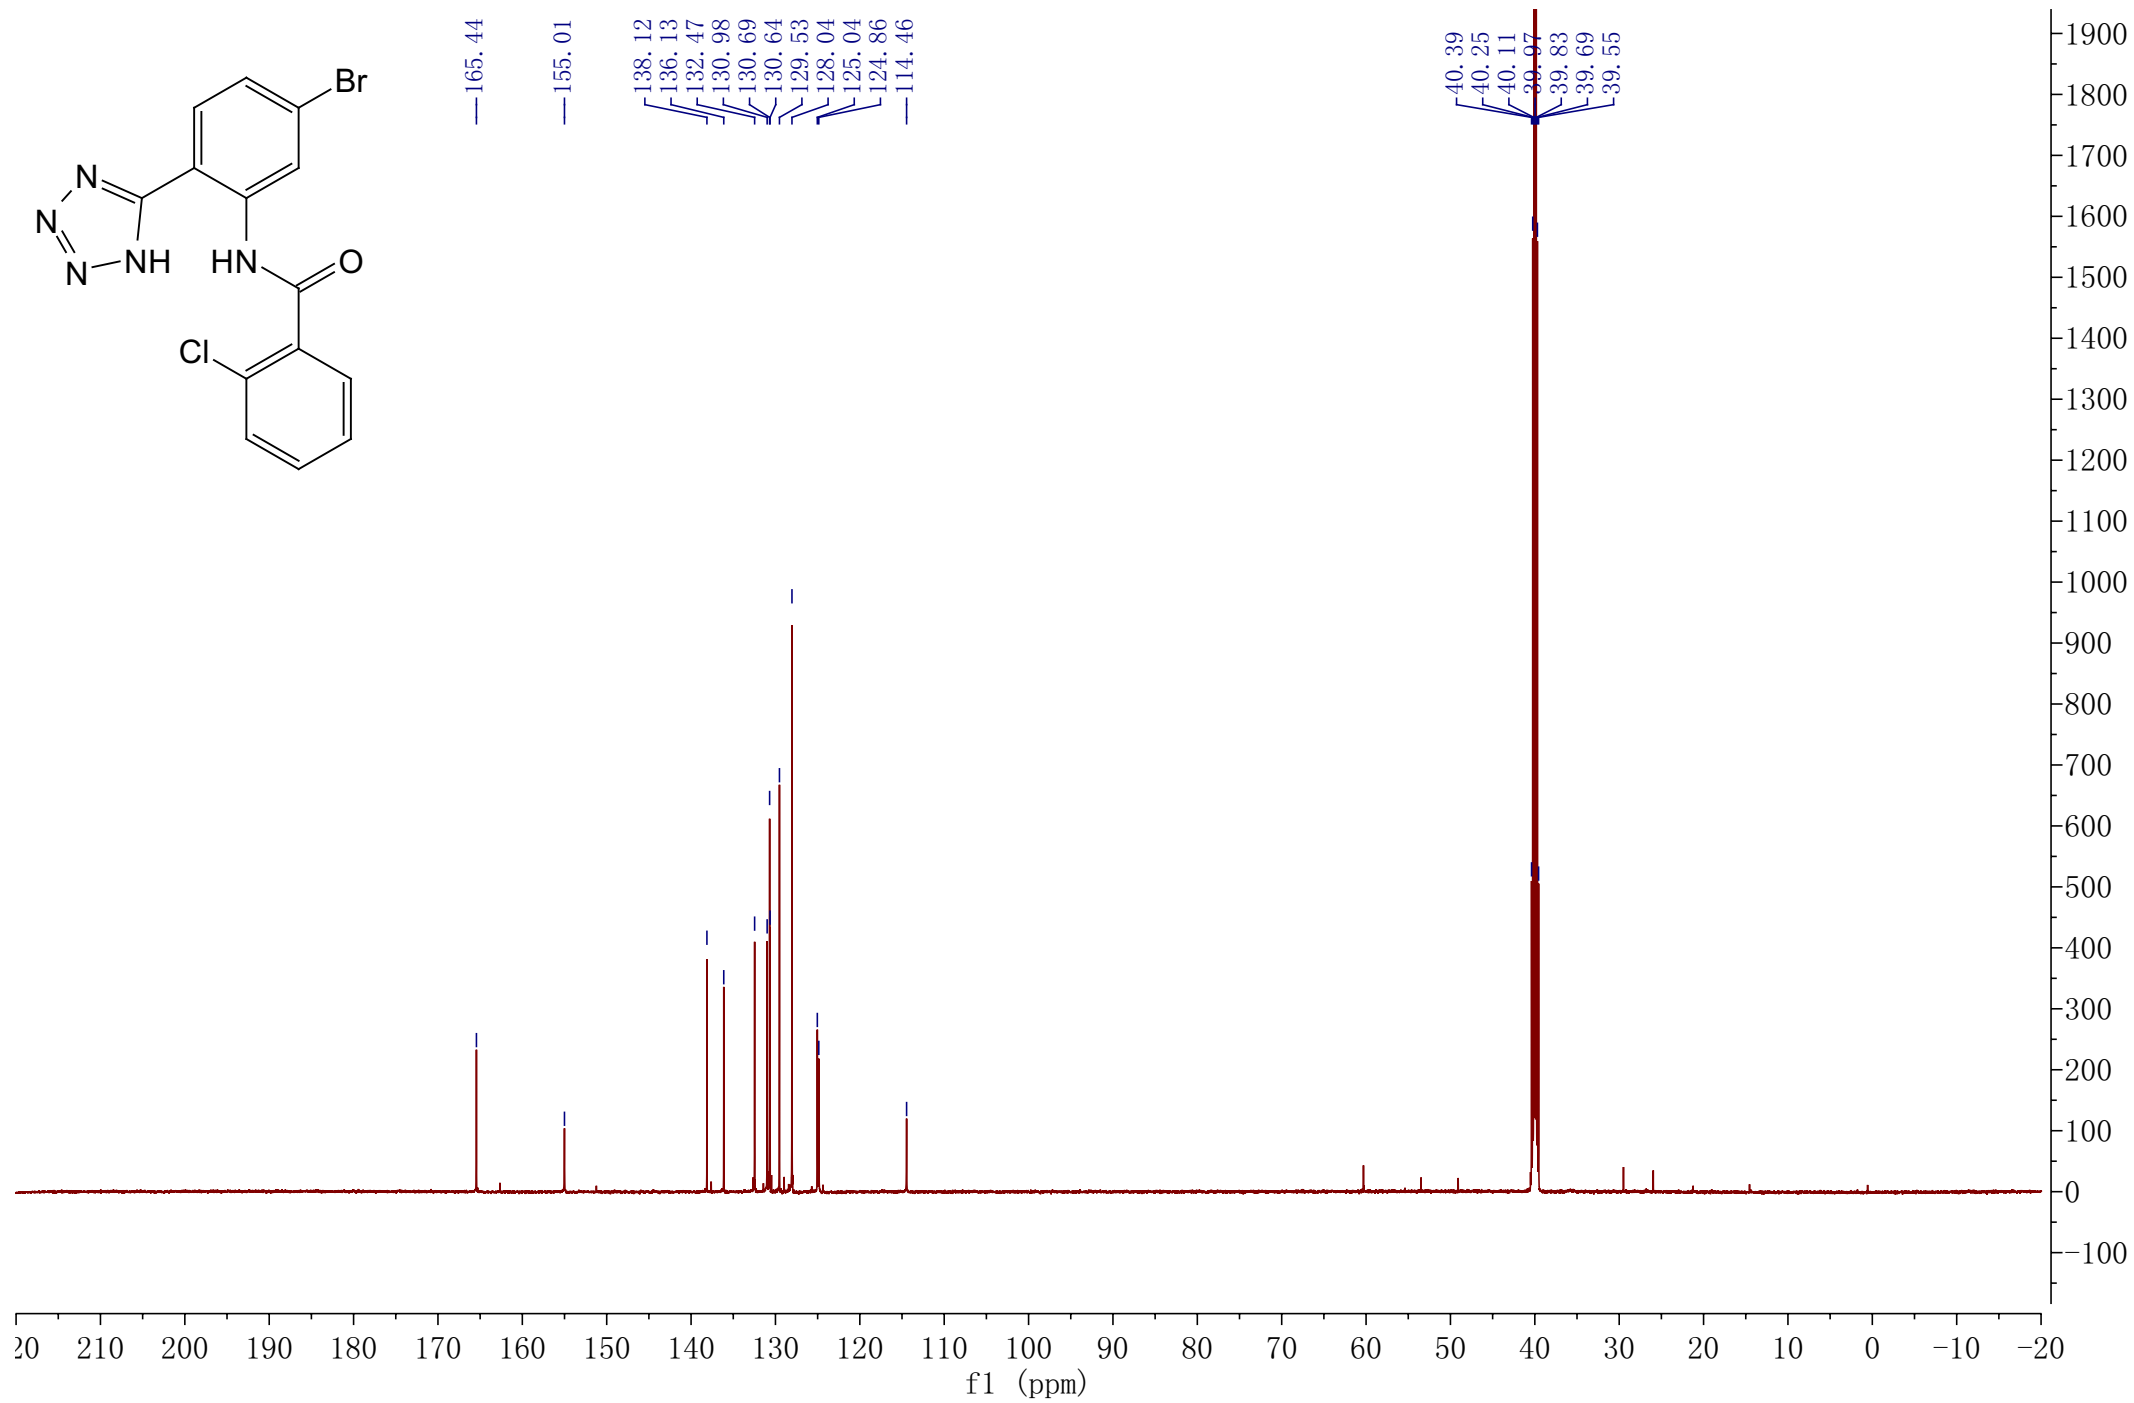

$^1\text{H}$  NMR (600 MHz, DMSO)  $\delta$  11.74 (s, 1H), 8.88 (d,  $J = 1.9$  Hz, 1H), 7.97 (d,  $J = 8.4$  Hz, 1H), 7.87 – 7.83 (m, 2H), 7.57 (dd,  $J = 8.4, 2.0$  Hz, 1H), 7.53 – 7.46 (m, 2H), 2.43 (s, 3H).

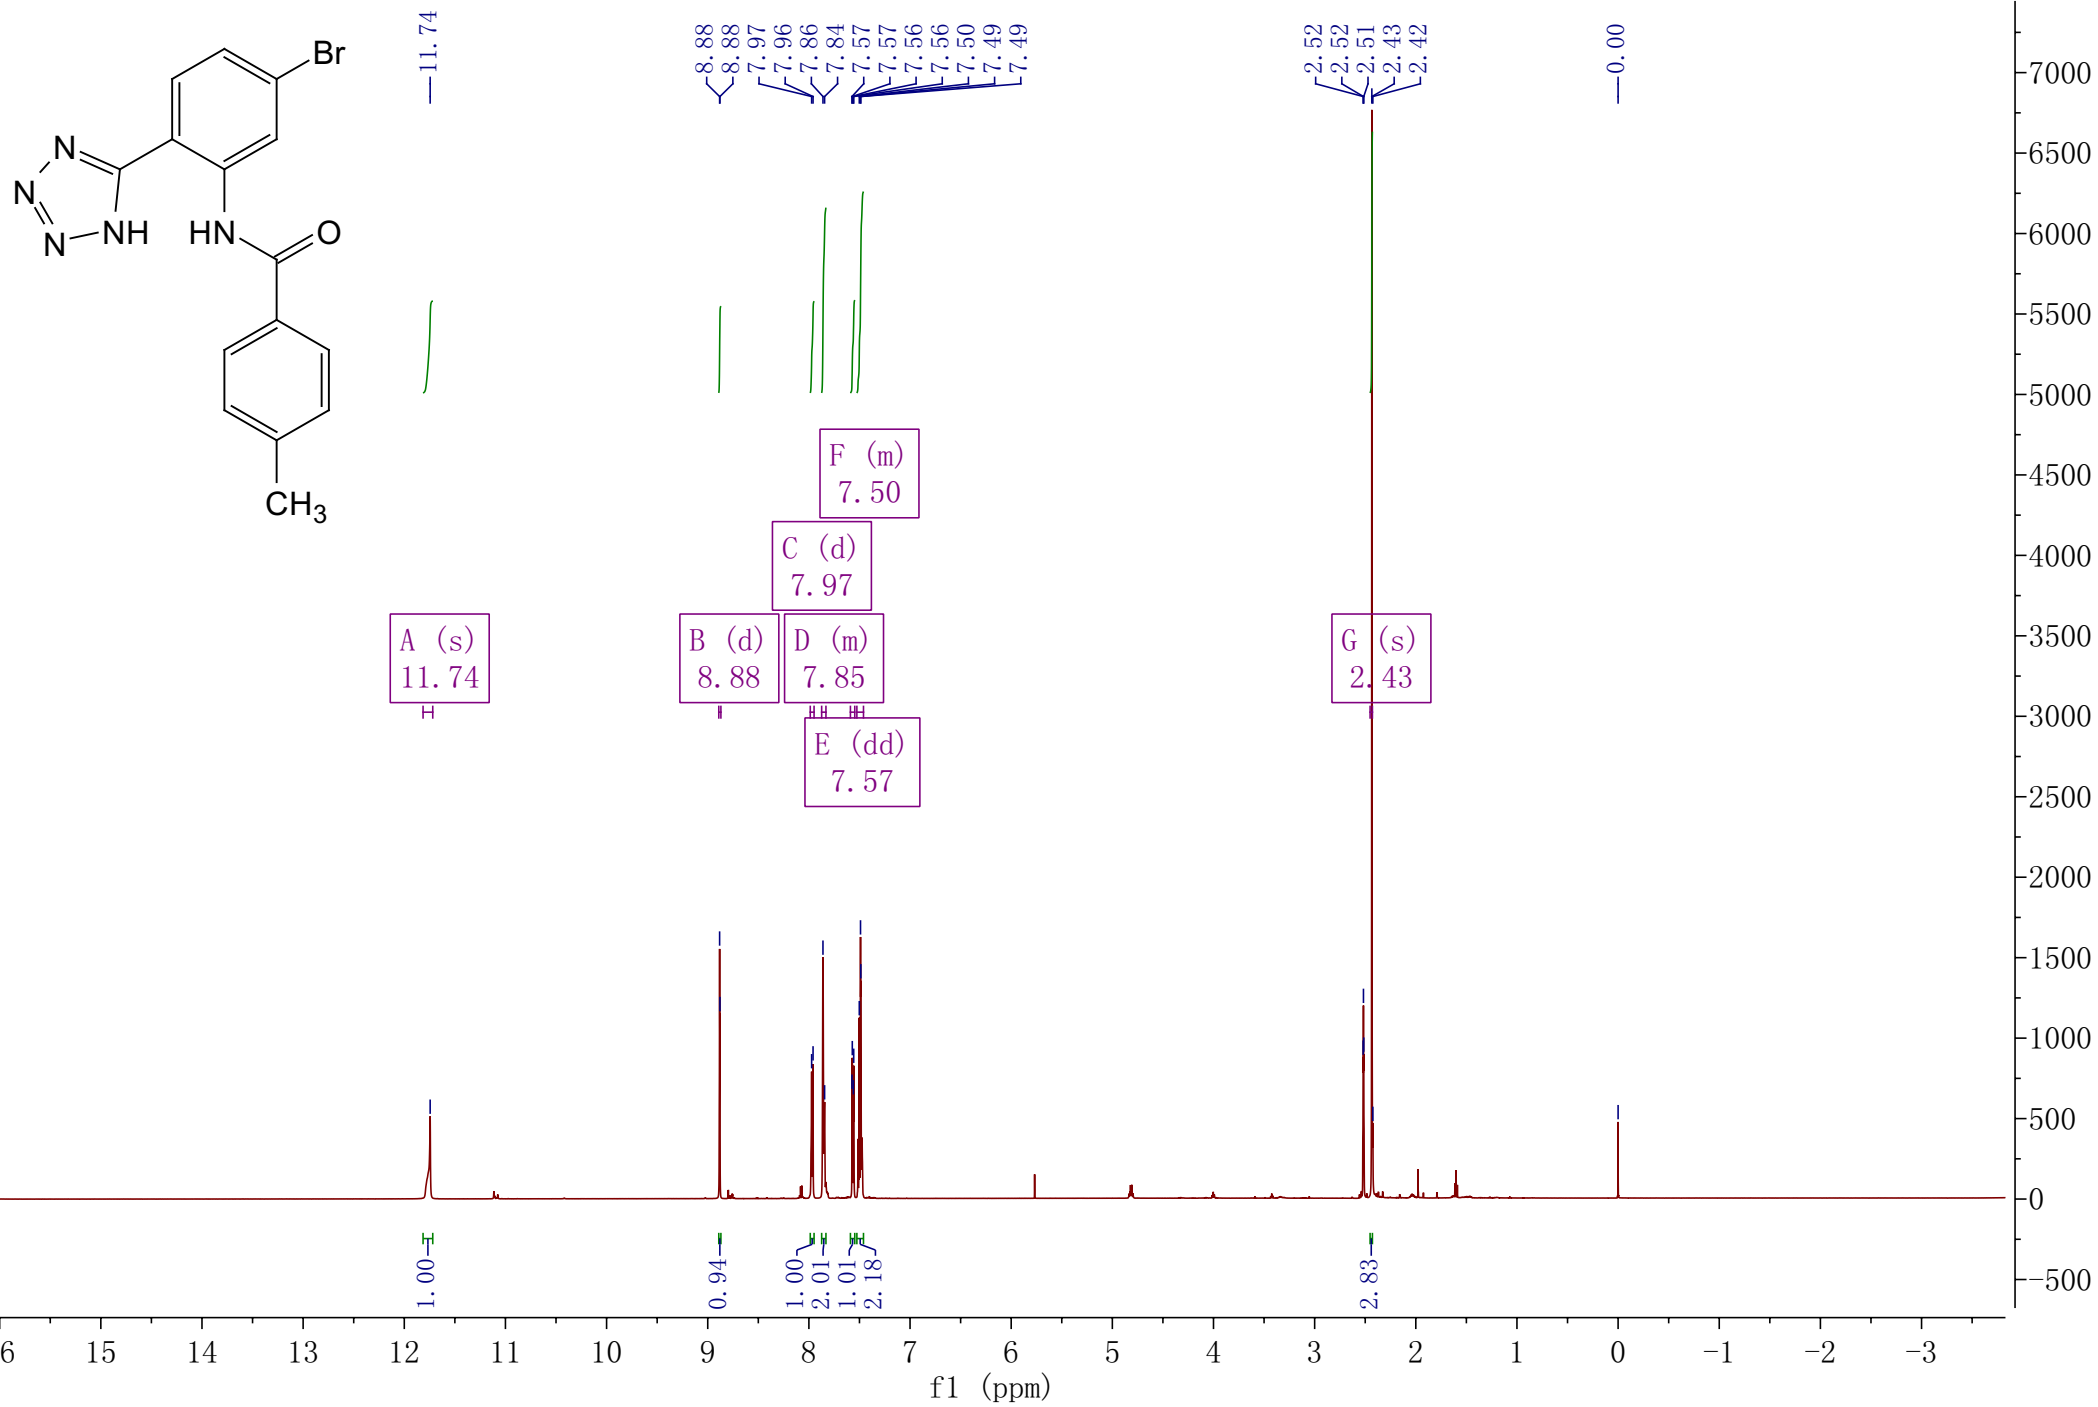

$^{13}\text{C}$  NMR (151 MHz, DMSO)  $\delta$  164.69, 154.13, 137.72, 133.37, 132.41, 129.49, 128.22, 127.43, 126.17, 124.25, 123.79, 123.05, 111.90, 39.34, 39.20, 39.07, 38.93, 38.79, 38.65, 38.51, 20.44.

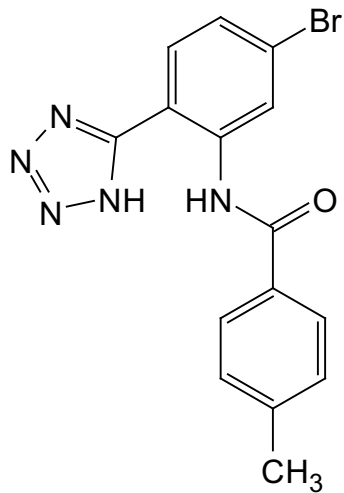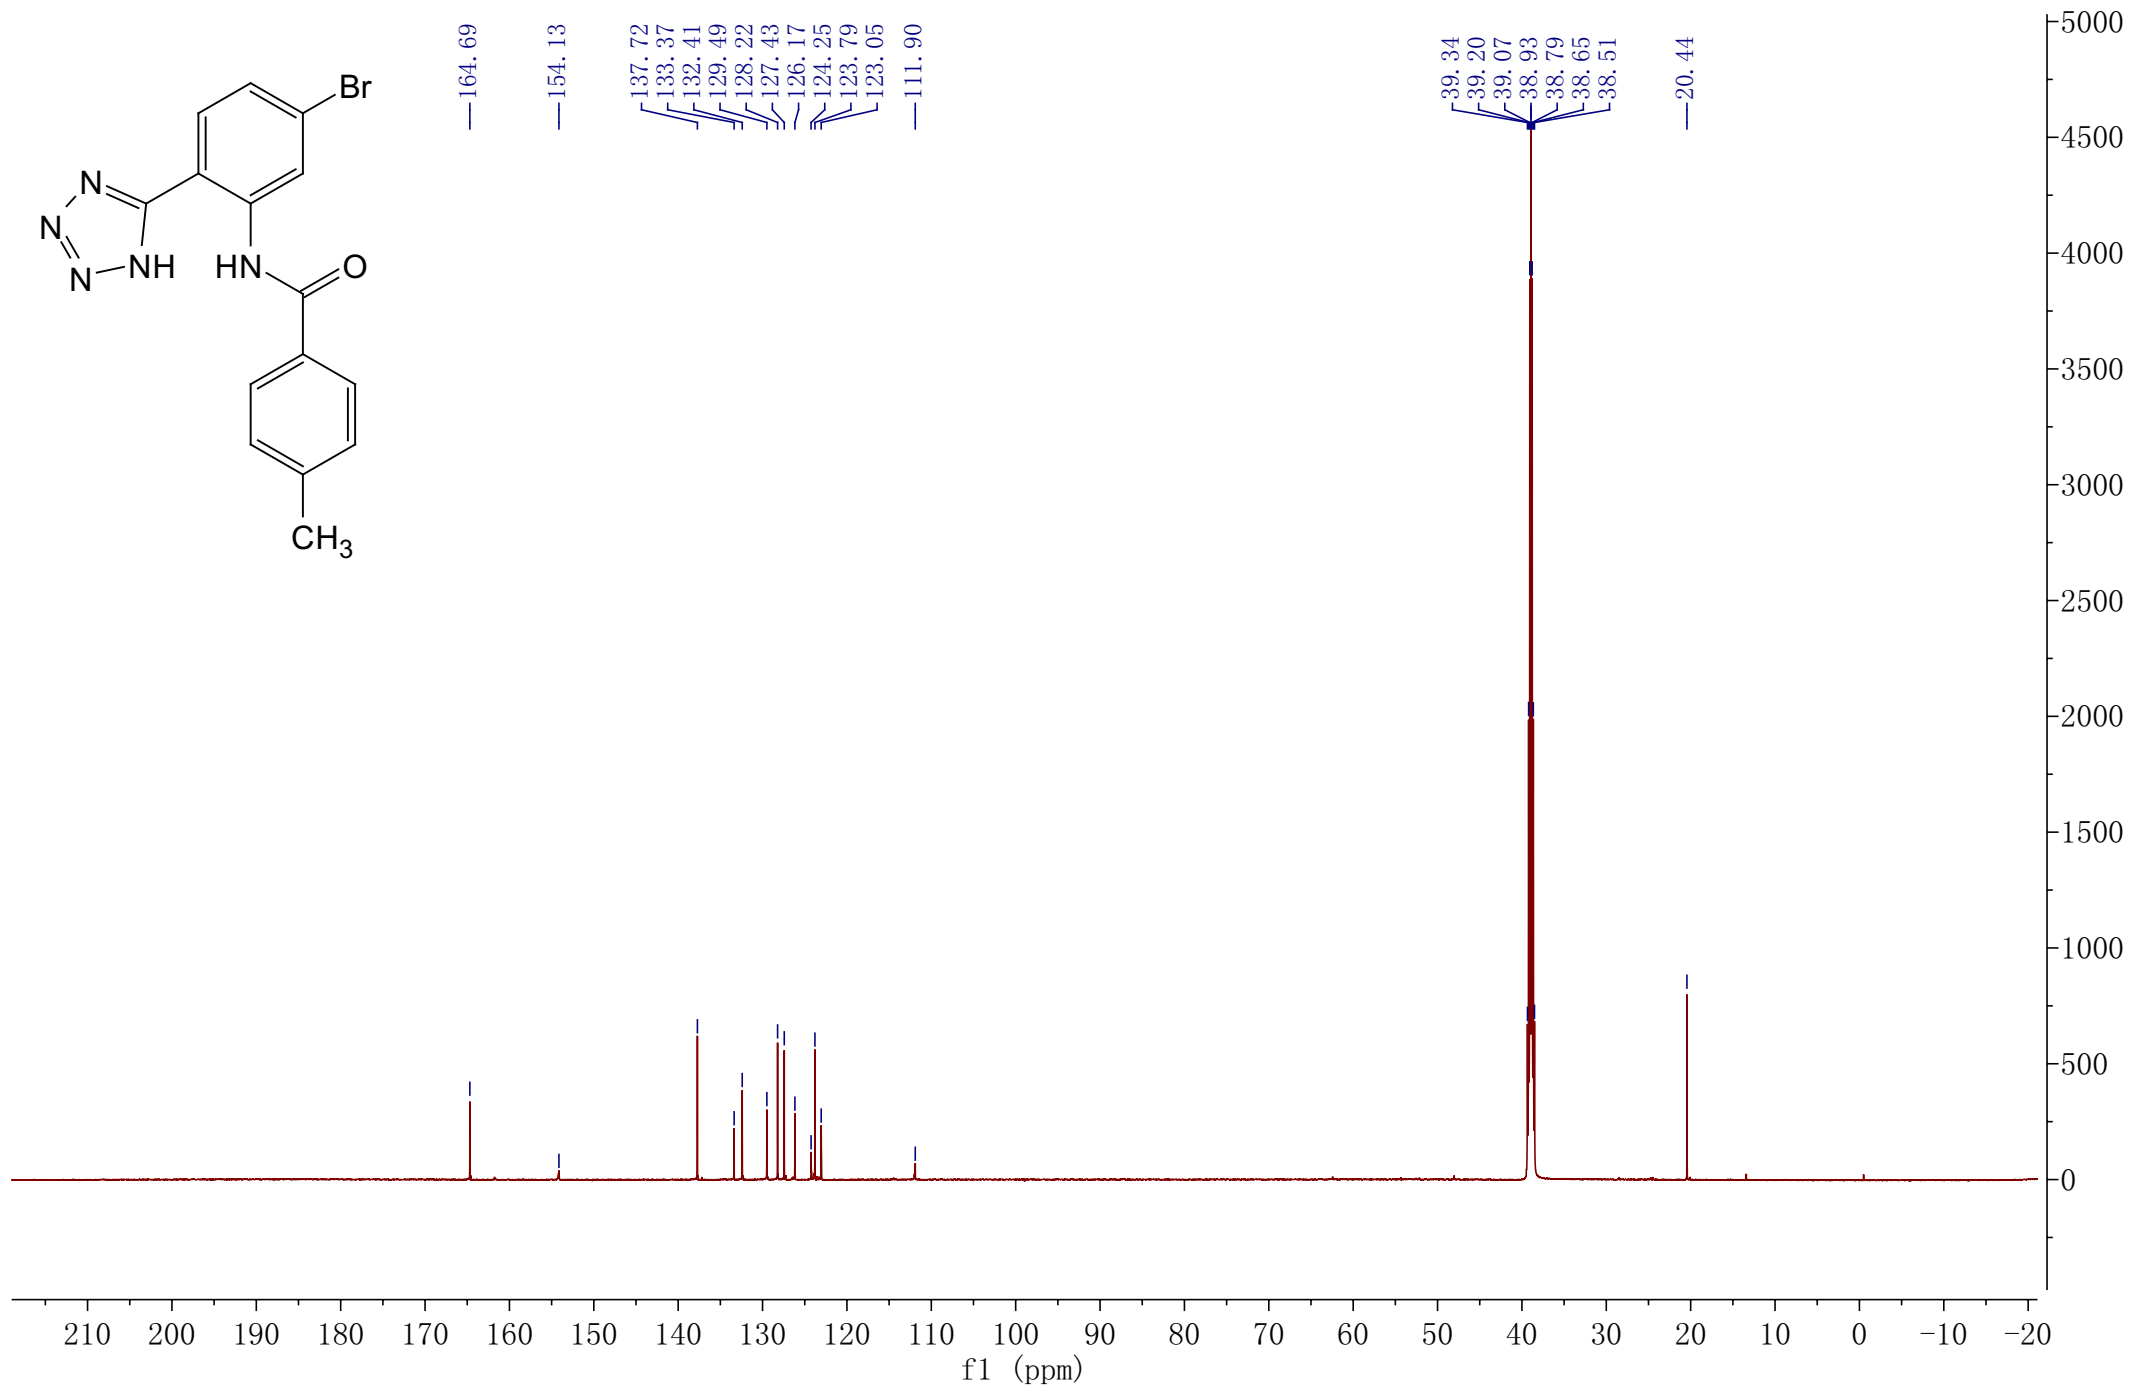



$^1\text{H}$  NMR (600 MHz, DMSO)  $\delta$  8.71 (d,  $J = 2.0$  Hz, 1H), 8.03 (t,  $J = 1.8$  Hz, 1H), 8.00 – 7.97 (m, 1H), 7.94 (d,  $J = 8.4$  Hz, 1H), 7.74 (tt,  $J = 5.8, 2.3$  Hz, 1H), 7.66 (dd,  $J = 9.9, 5.9$  Hz, 1H), 7.62 (dd,  $J = 8.4, 2.0$  Hz, 1H).

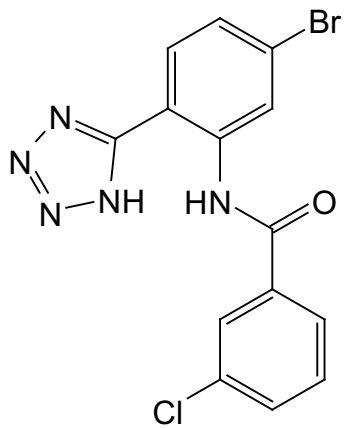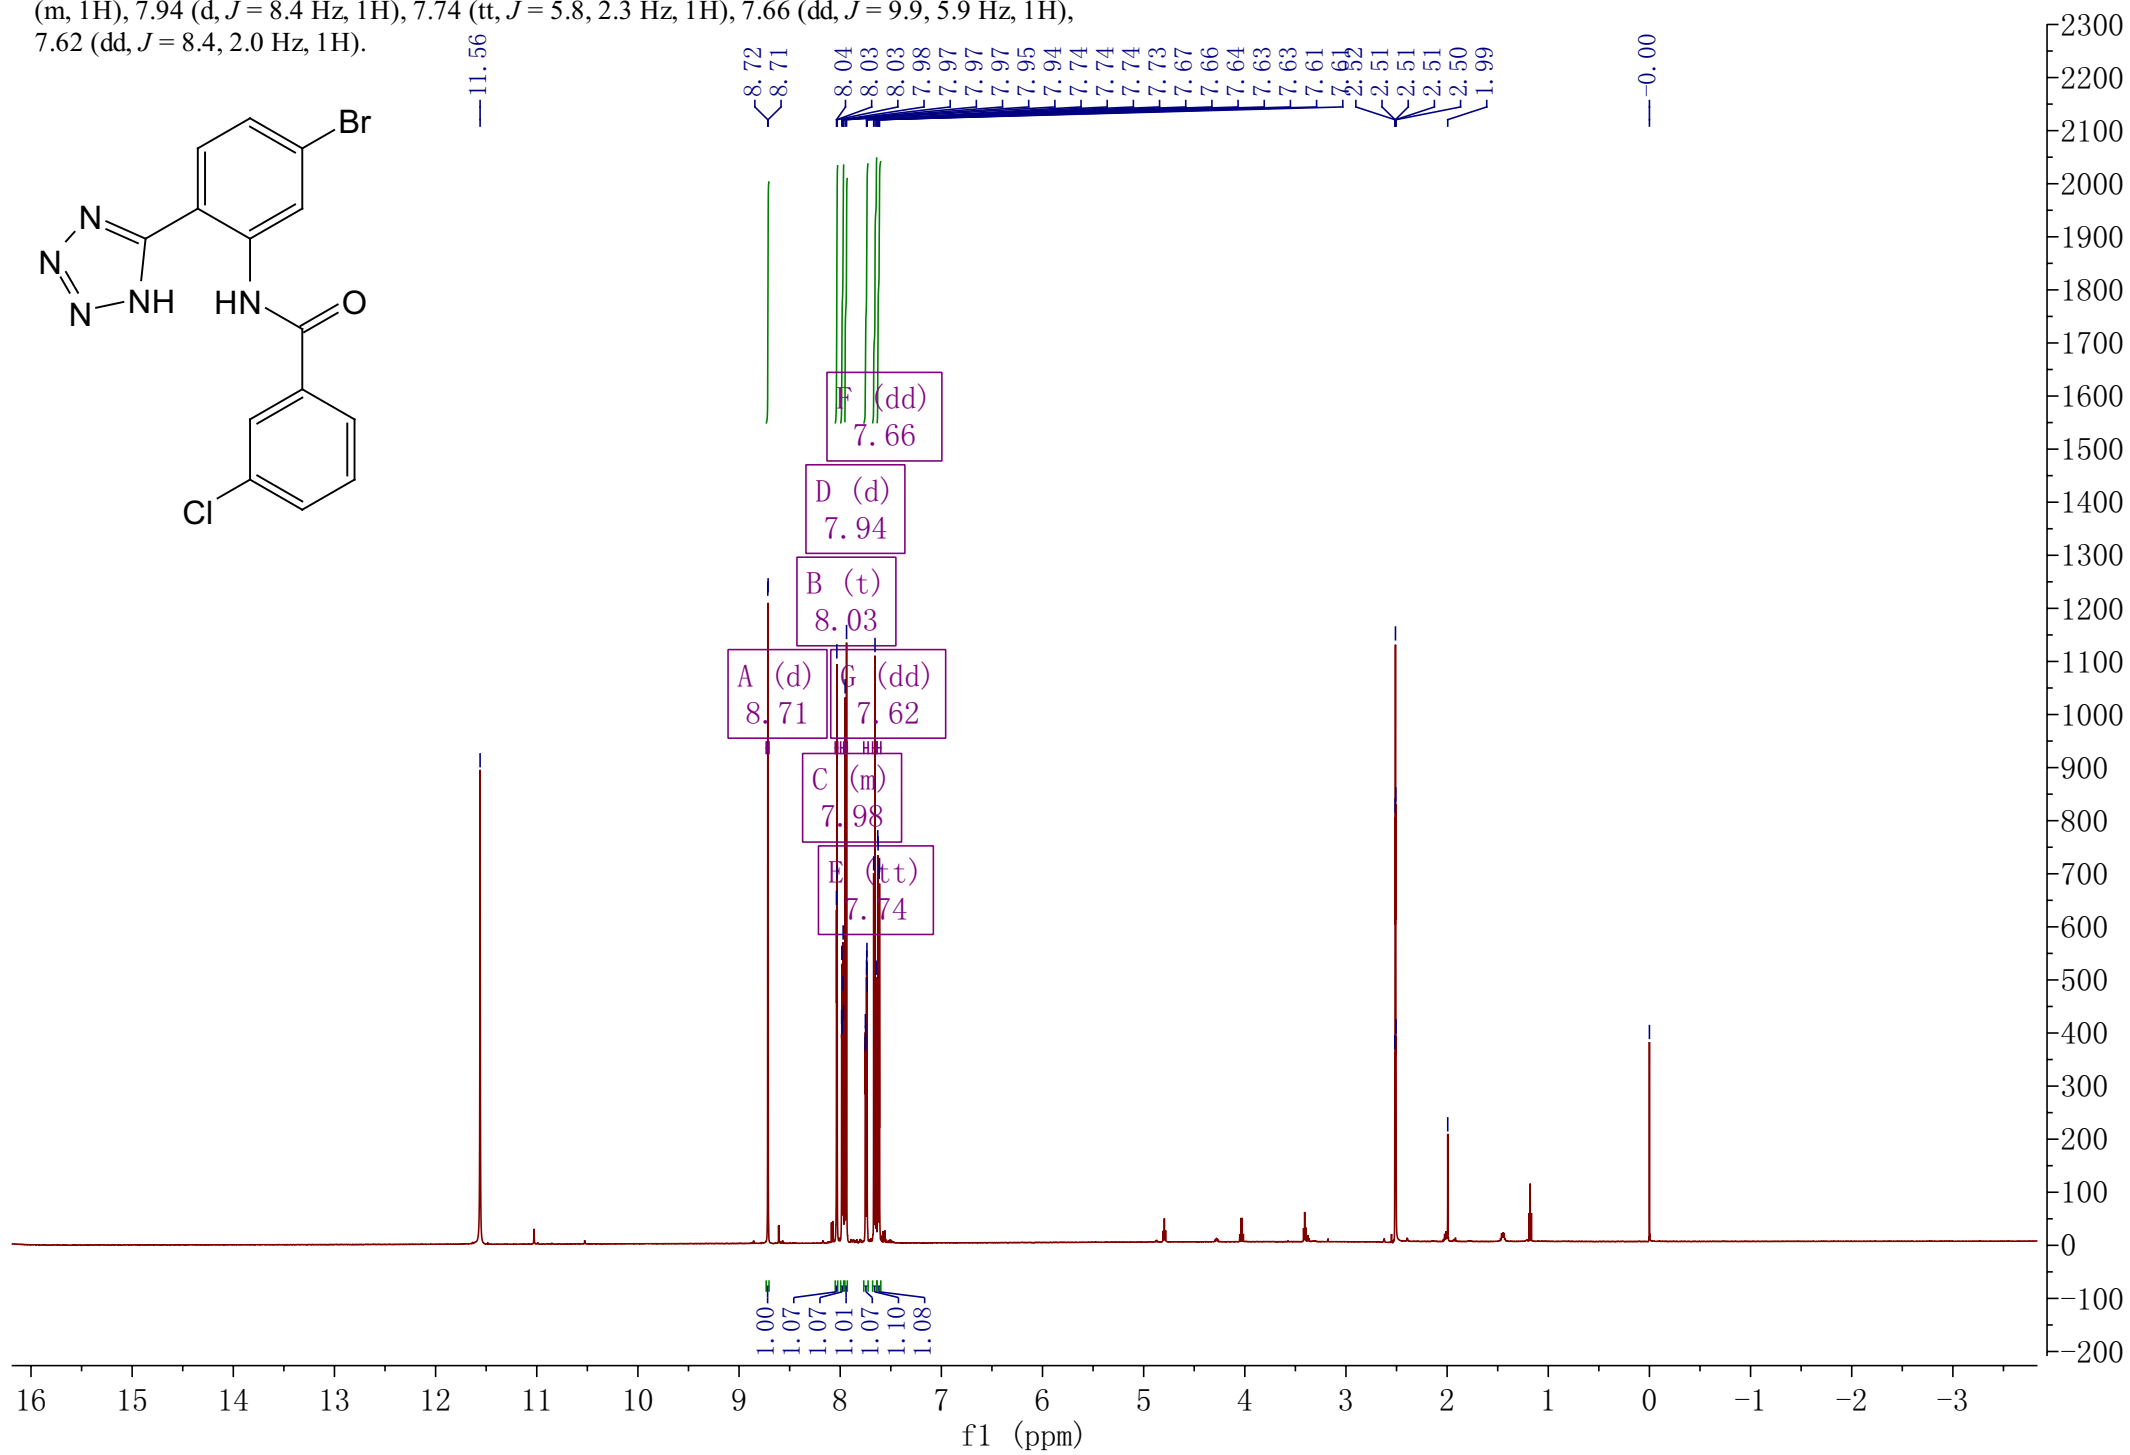

$^{13}\text{C}$  NMR (151 MHz, DMSO)  $\delta$  164.35, 154.94, 138.37, 136.50, 134.17, 132.64, 131.36, 130.82, 127.92, 127.85, 126.49, 125.26, 125.13, 114.07, 40.40, 40.26, 40.12, 39.88, 39.84, 39.70, 39.56.

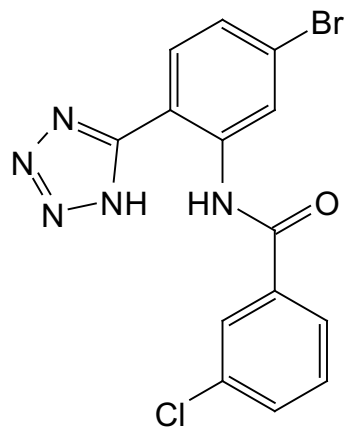

— 164.35  
— 154.94  
138.37  
136.50  
134.17  
132.64  
131.36  
130.82  
127.92  
127.85  
126.49  
125.26  
125.13  
— 114.07

40.40  
40.26  
40.12  
39.88  
39.84  
39.70  
39.56

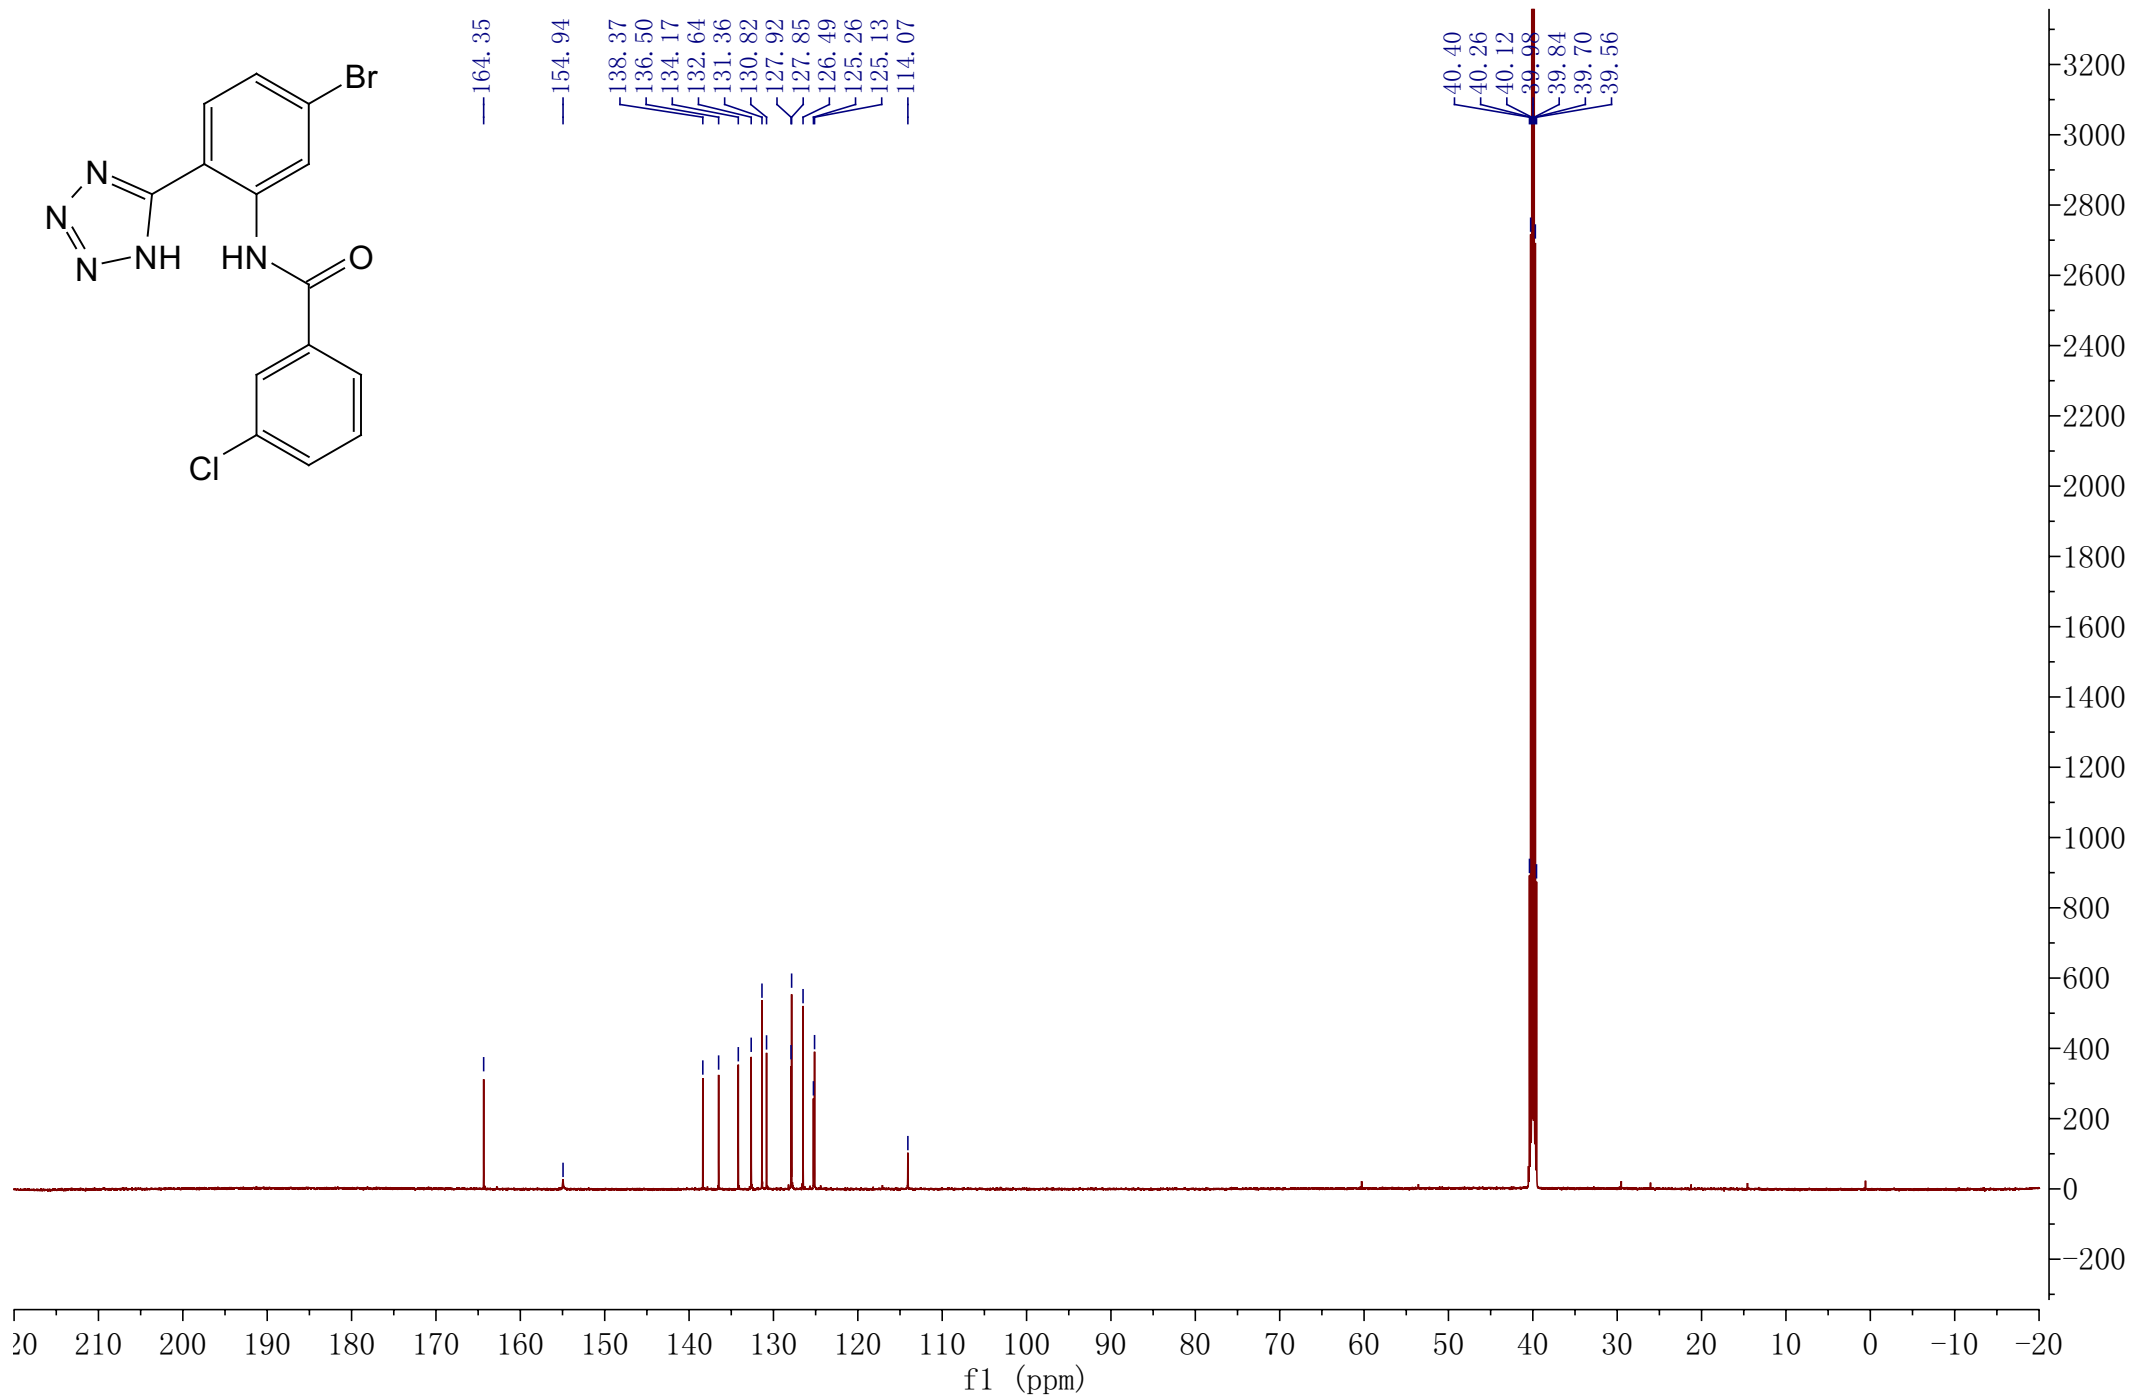

$^1\text{H}$  NMR (600 MHz, DMSO)  $\delta$  11.73 (s, 1H), 8.79 (s, 1H), 8.04 (d,  $J = 7.9$  Hz, 2H), 7.96 (d,  $J = 8.3$  Hz, 1H), 7.69 (d,  $J = 7.9$  Hz, 2H), 7.58 (d,  $J = 8.0$  Hz, 1H).

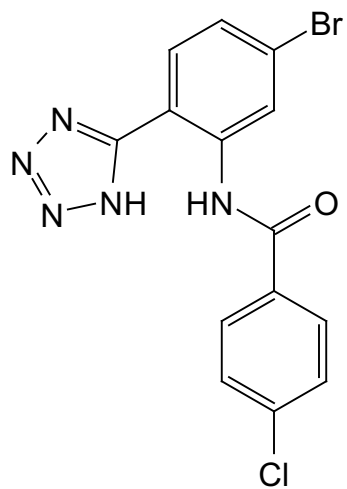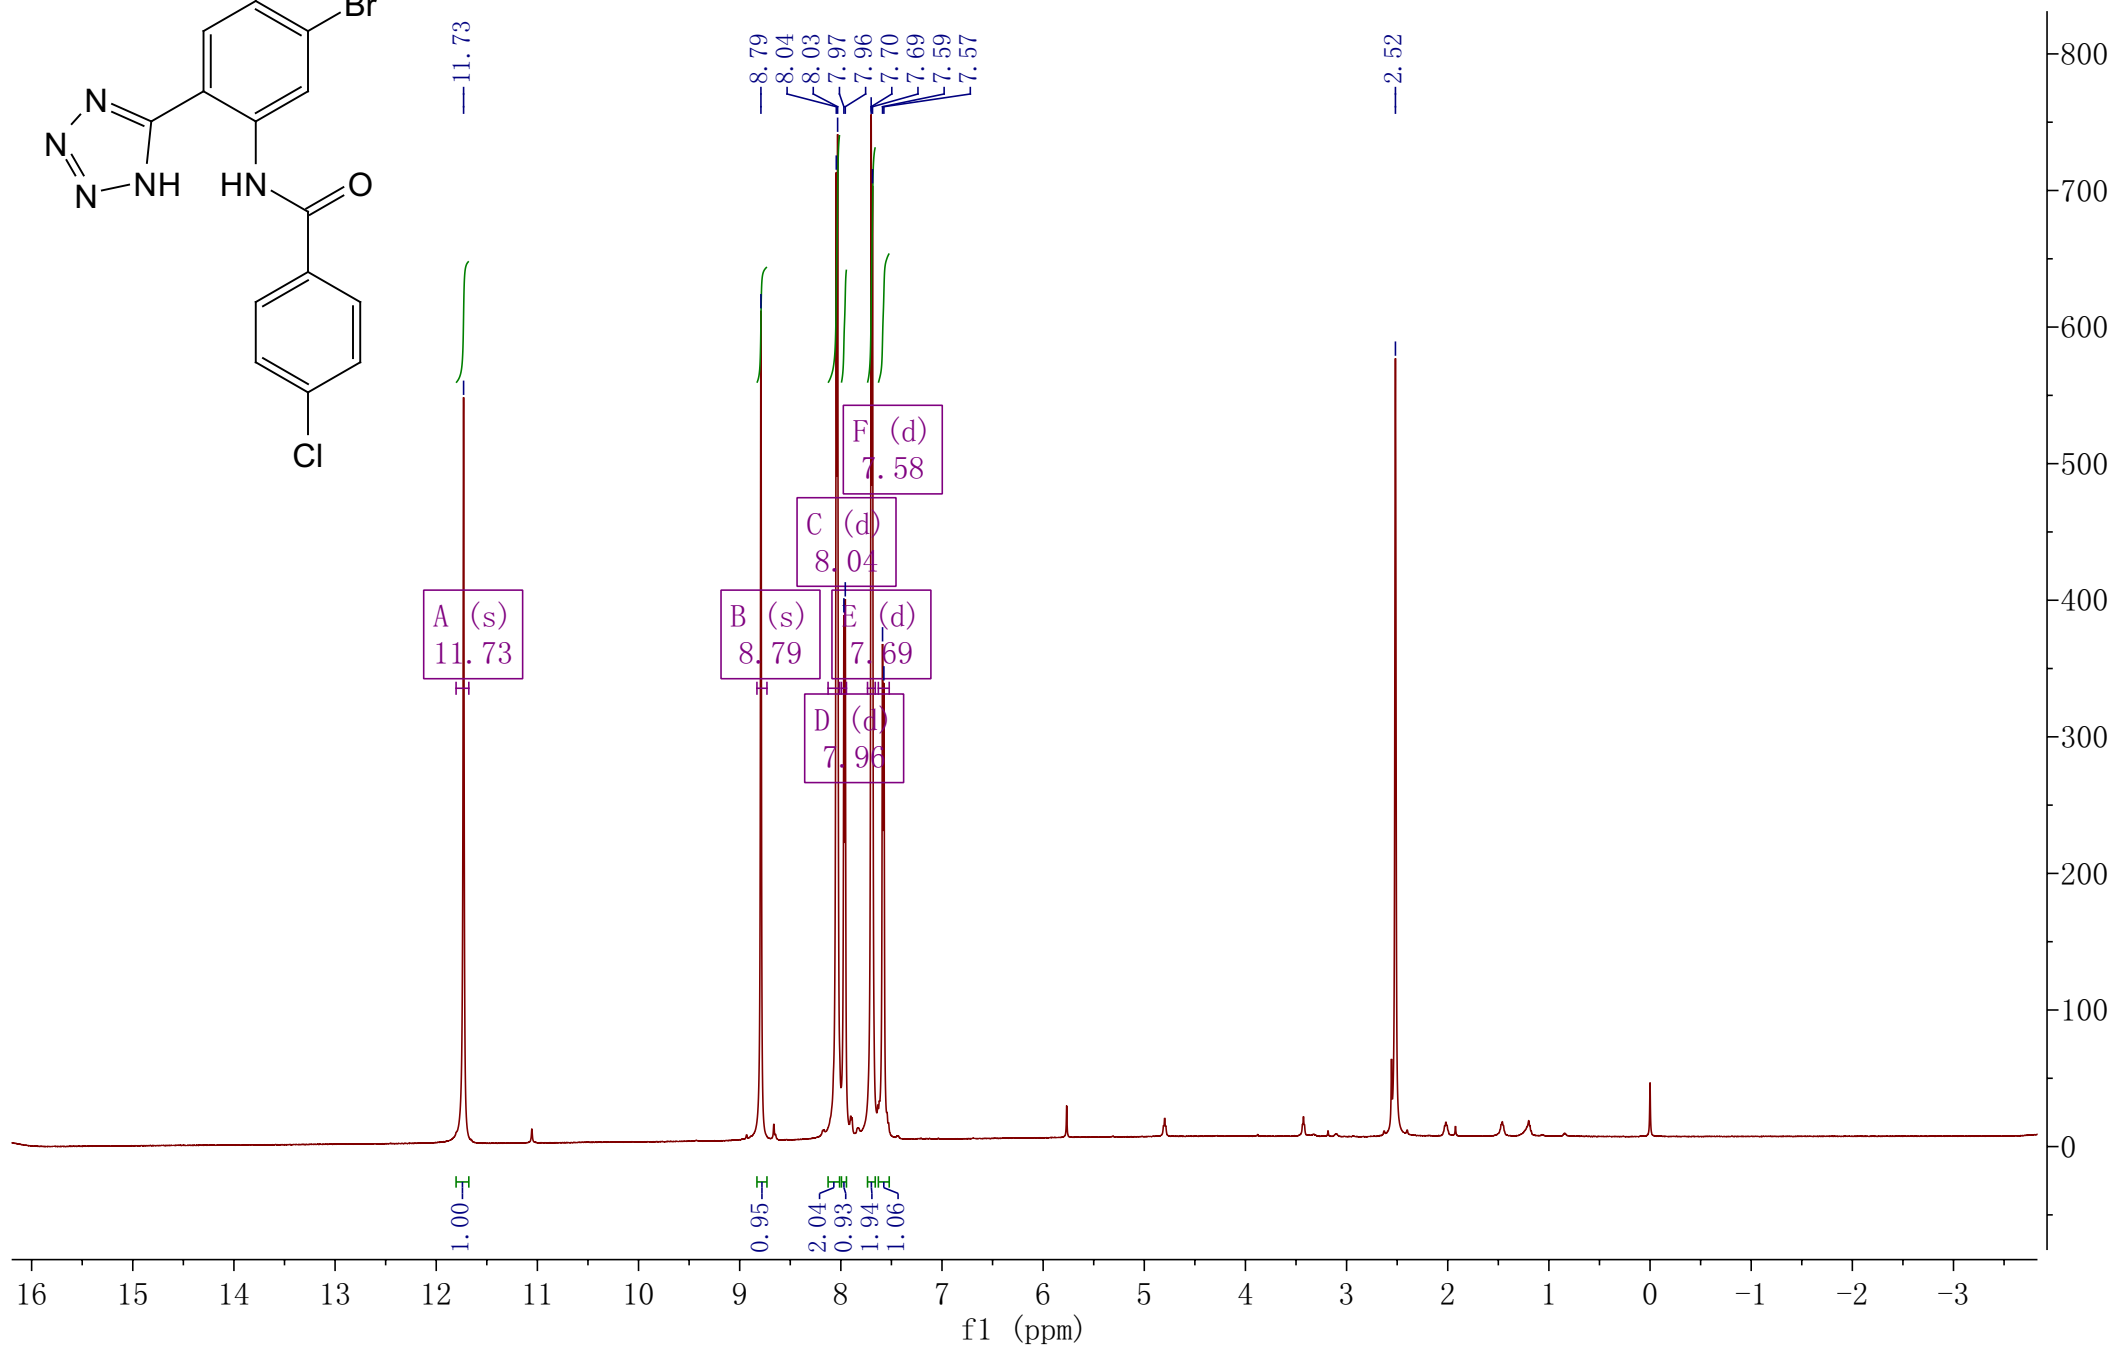

$^{13}\text{C}$  NMR (151 MHz, DMSO)  $\delta$  164.65, 155.19, 138.48, 137.77, 133.23, 130.61, 129.72, 129.49, 127.57, 125.12, 124.54, 113.69, 40.40, 40.26, 40.12, 39.98, 39.84, 39.70, 39.56.

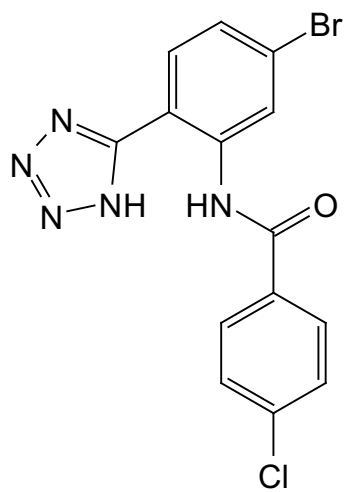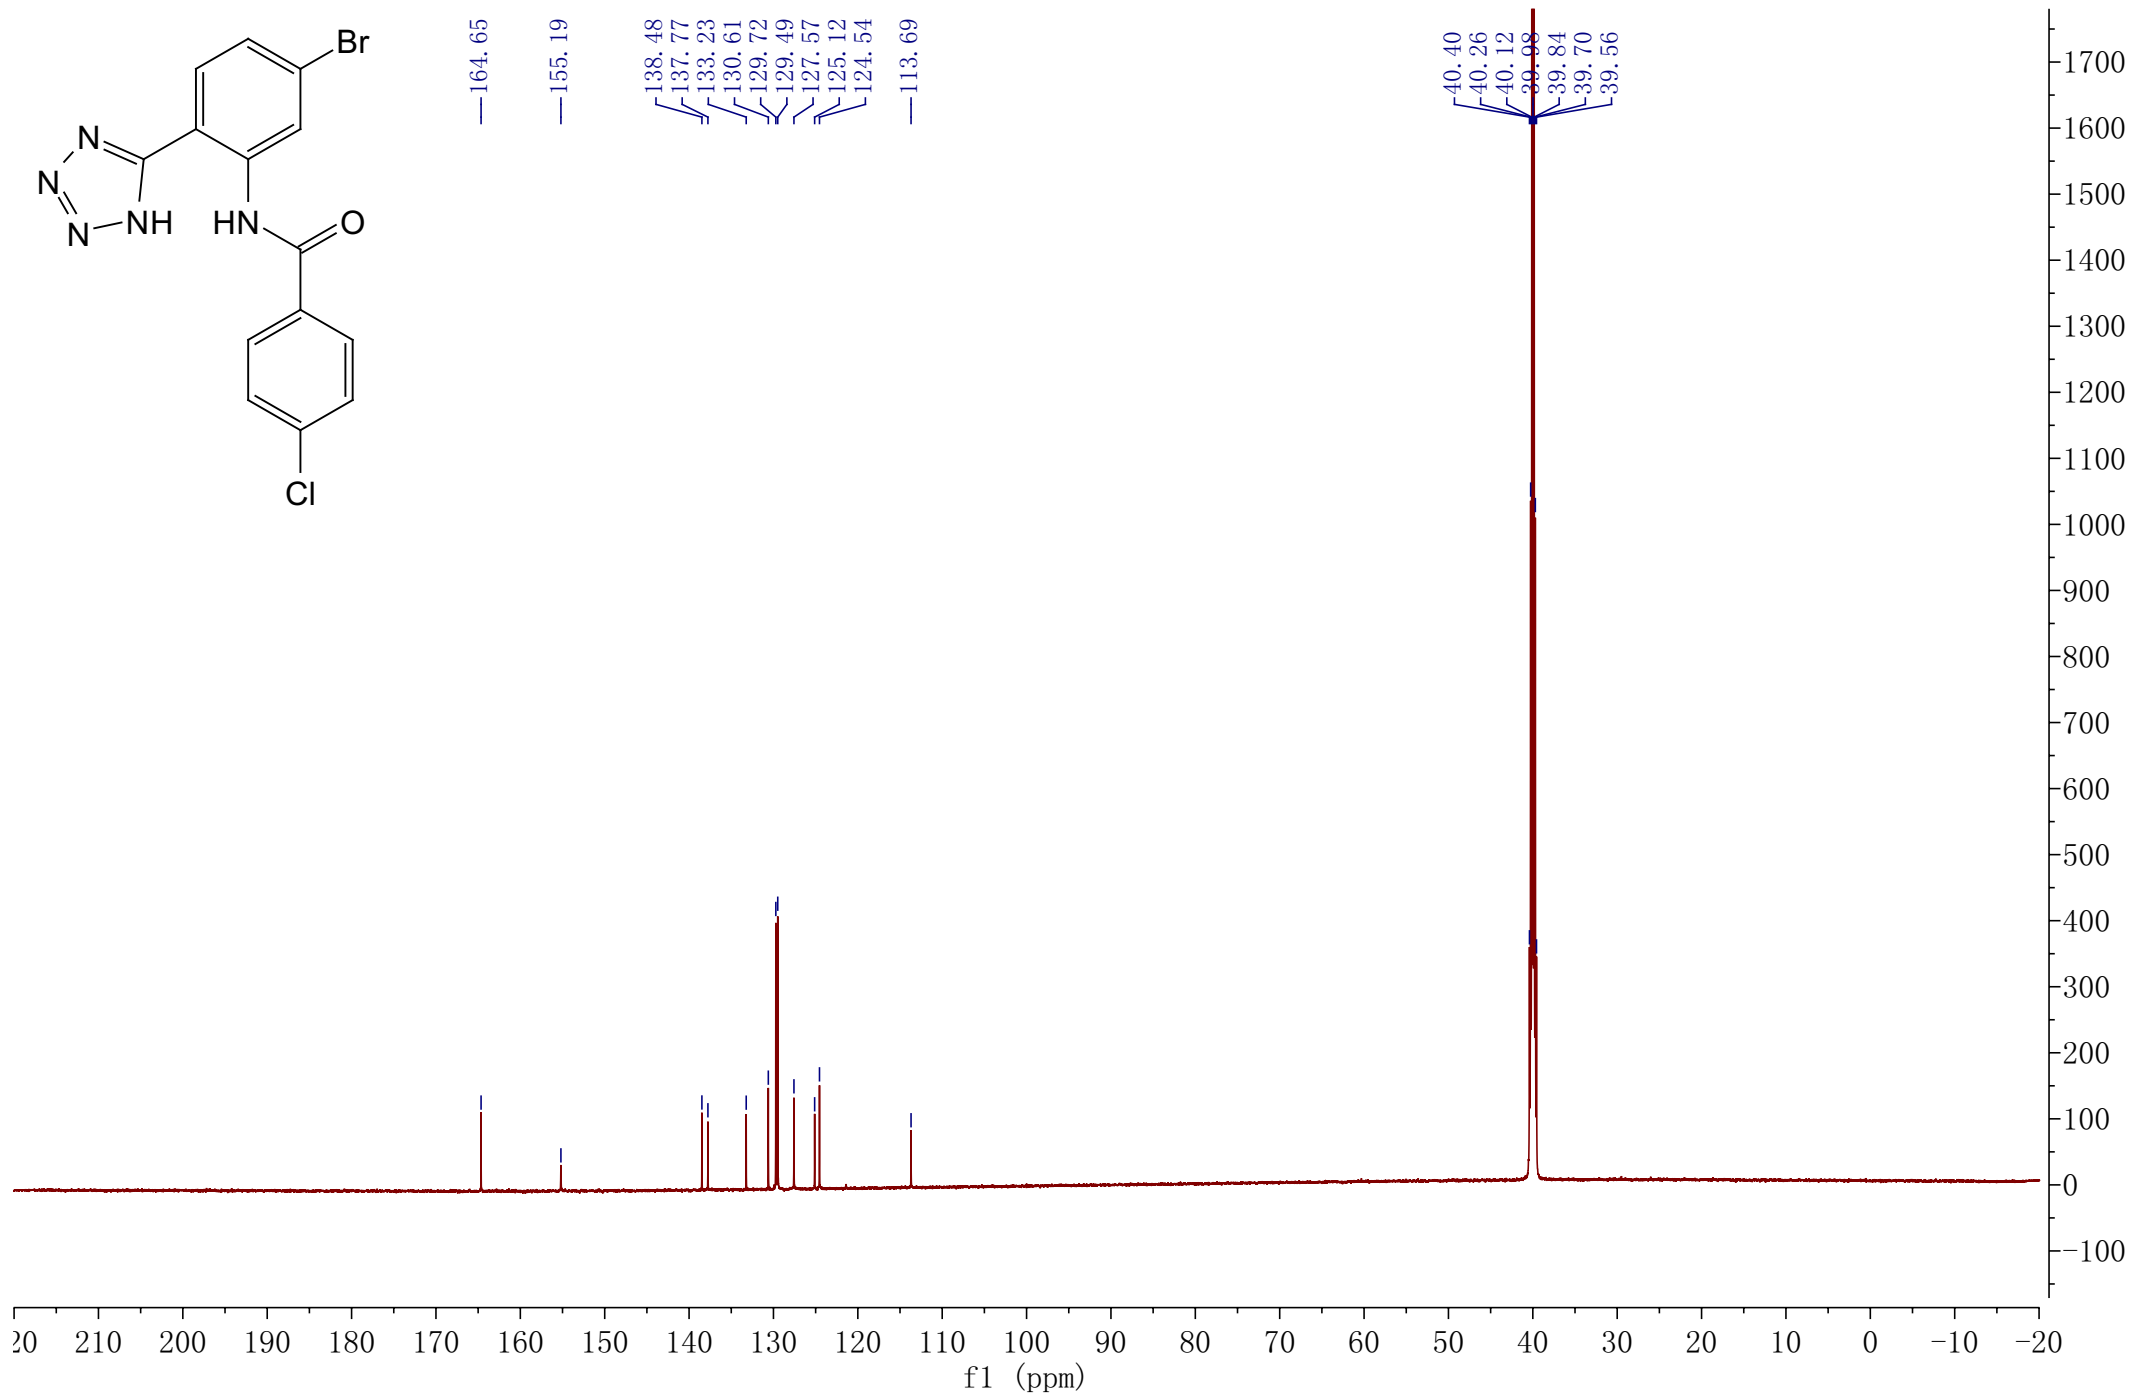

$^1\text{H}$  NMR (600 MHz, DMSO)  $\delta$  11.48 (d,  $J = 2.4$  Hz, 1H), 8.81 (d,  $J = 1.4$  Hz, 1H), 7.95 (d,  $J = 8.4$  Hz, 1H), 7.91 (td,  $J = 7.6, 1.4$  Hz, 1H), 7.69 (td,  $J = 7.3, 1.5$  Hz, 1H), 7.63 (dd,  $J = 8.4, 1.9$  Hz, 1H), 7.44 (dt,  $J = 15.0, 8.1$  Hz, 2H).

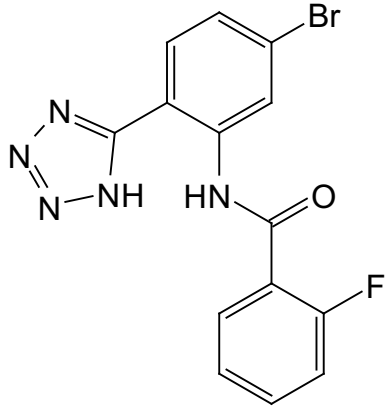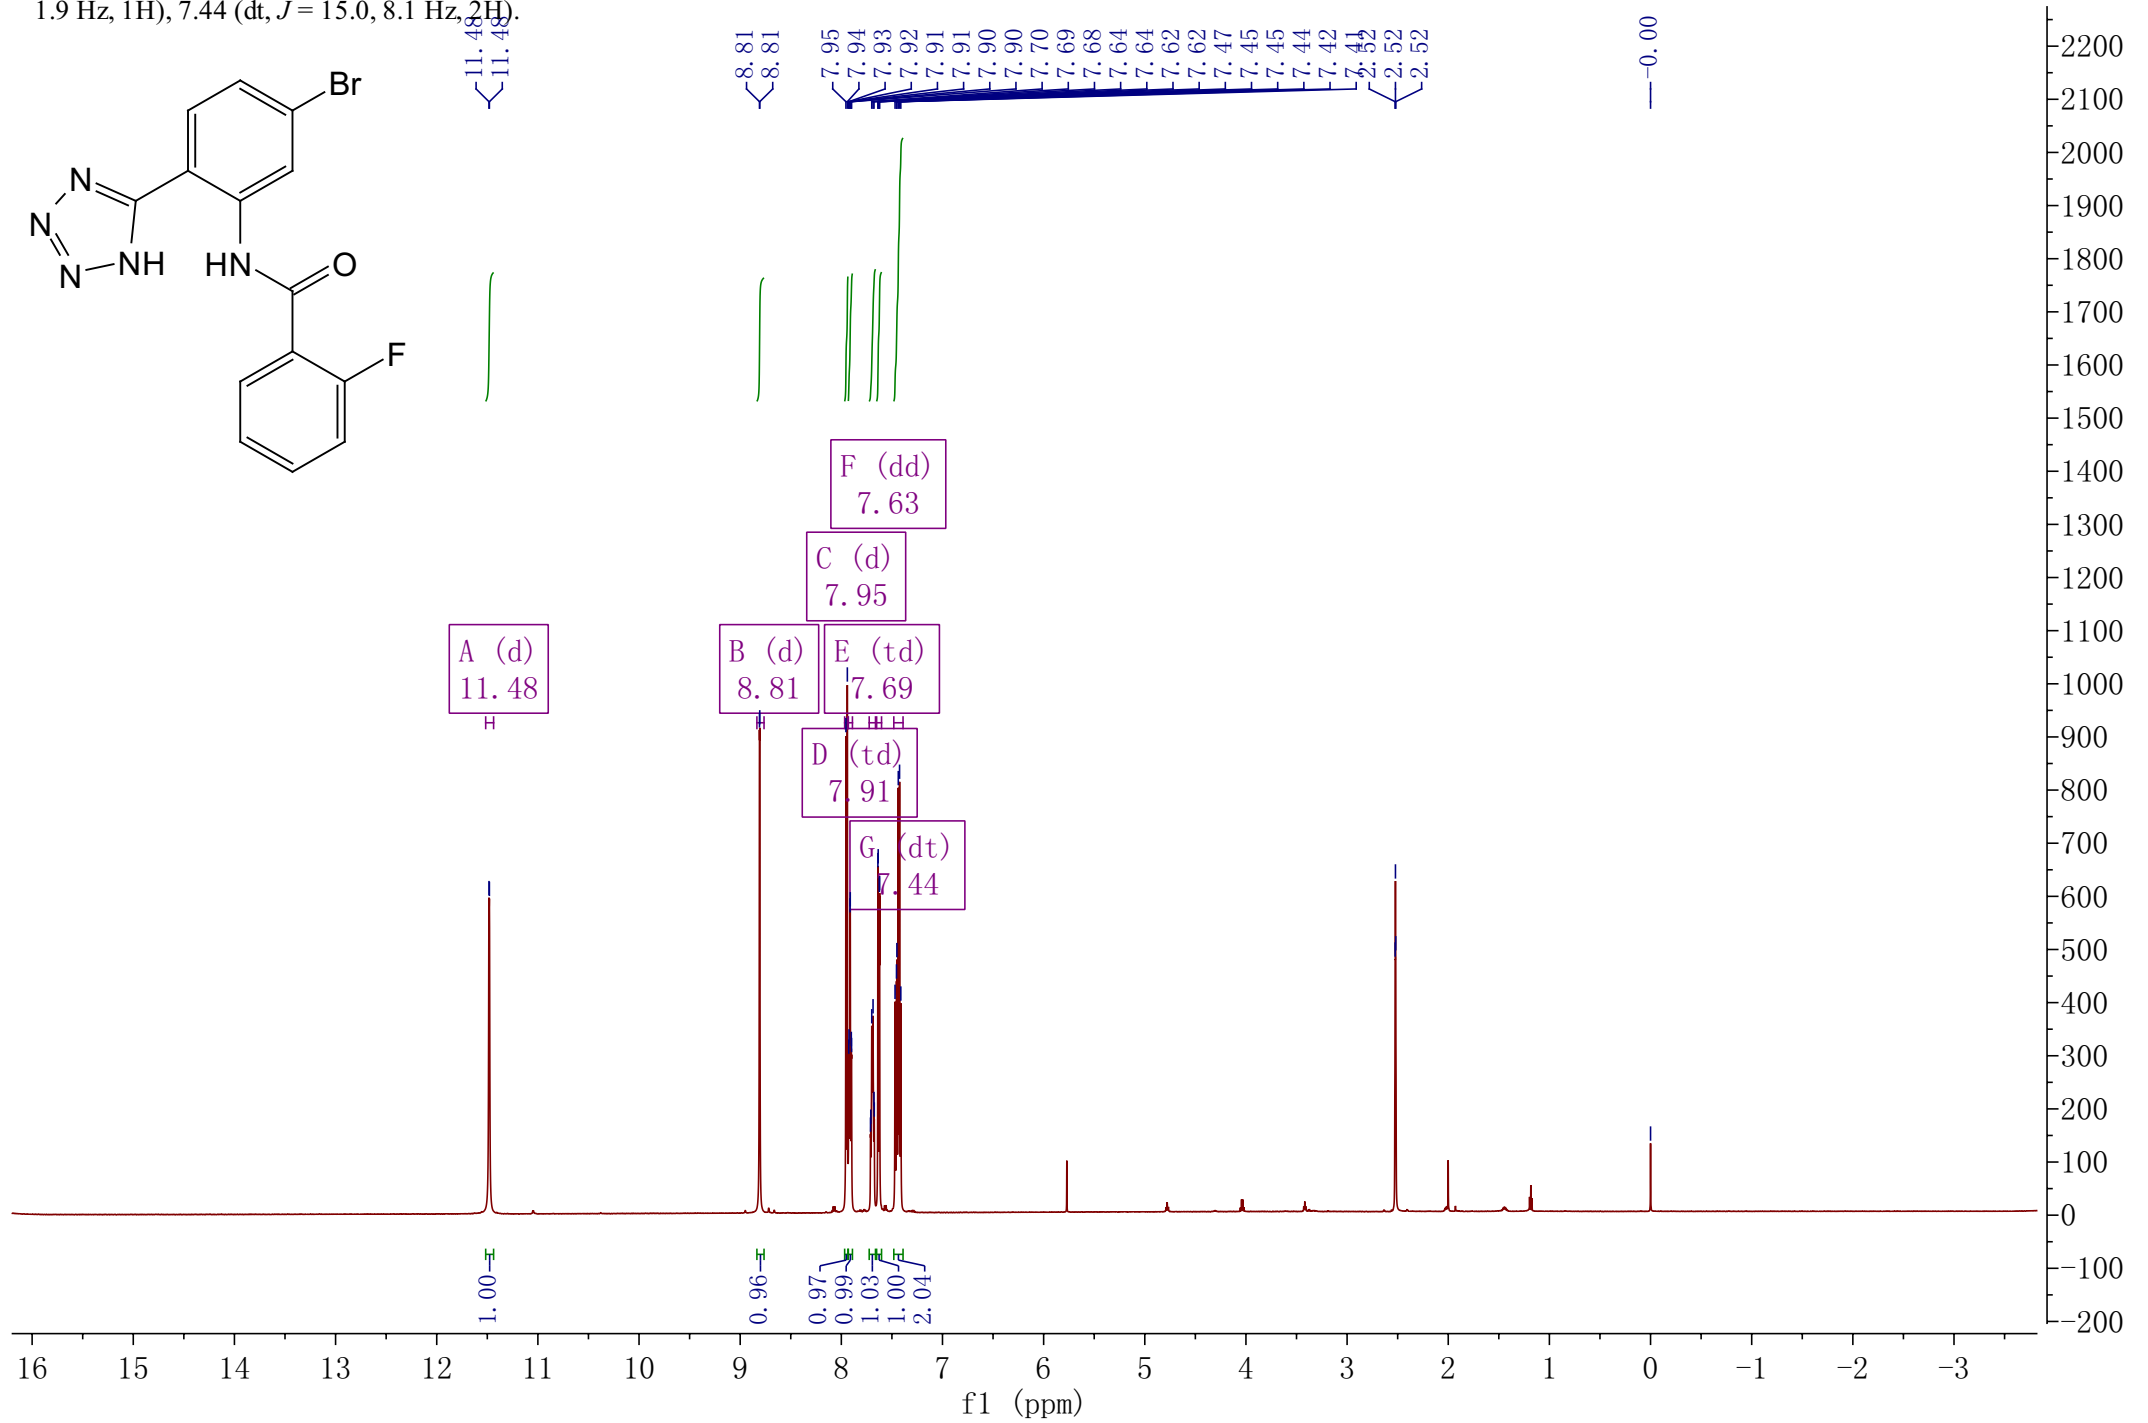

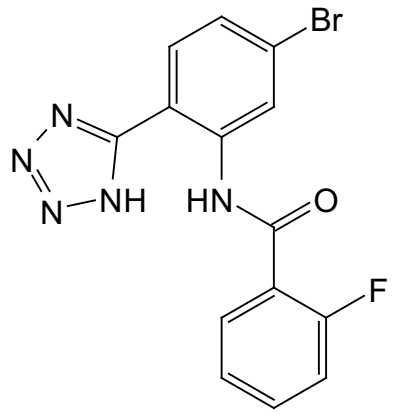

- 162.86
- 162.85
- 160.66
- 159.00
- 154.78
- 138.21
- 134.57
- 134.51
- 131.01
- 131.00
- 130.86
- 127.84
- 125.51
- 125.49
- 125.29
- 124.95
- 123.29
- 123.21
- 117.22
- 117.07
- 113.46

- 40.39
- 40.25
- 40.11
- 39.97
- 39.83
- 39.69
- 39.55

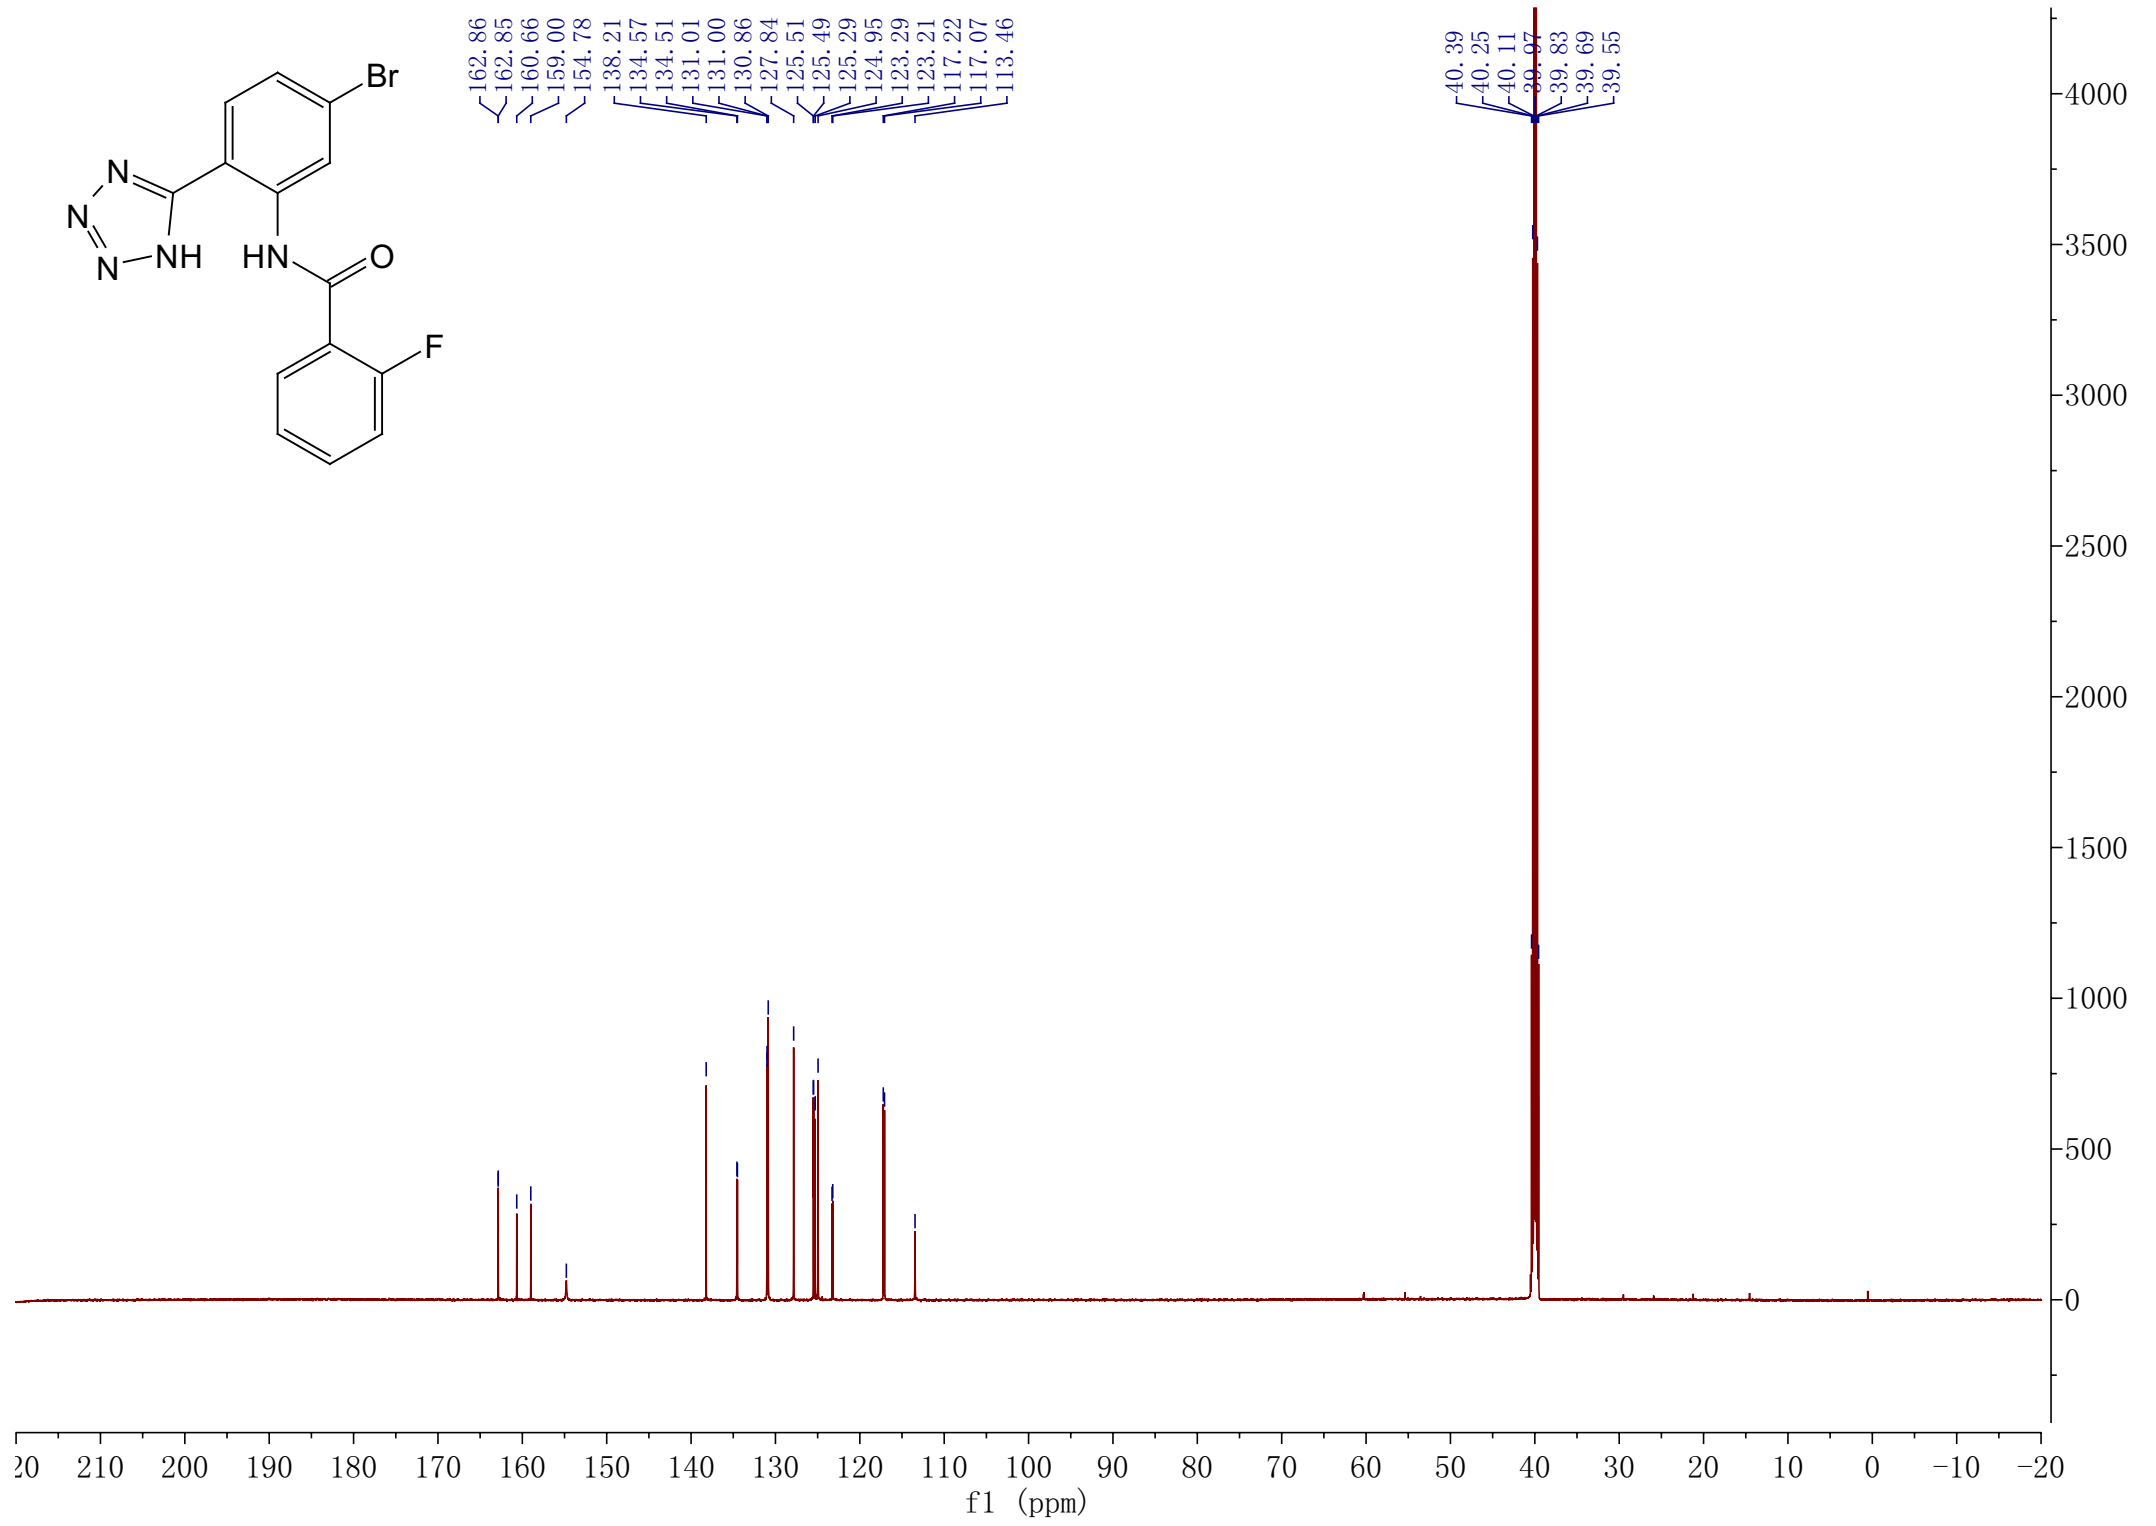

$^1\text{H}$  NMR (600 MHz, DMSO)  $\delta$  11.62 (s, 1H), 8.76 (d,  $J = 1.8$  Hz, 1H), 7.92 (d,  $J = 8.4$  Hz, 1H), 7.86 (d,  $J = 7.7$  Hz, 1H), 7.75 (d,  $J = 9.6$  Hz, 1H), 7.67 (dd,  $J = 13.8, 7.9$  Hz, 1H), 7.56 (dd,  $J = 8.4, 1.9$  Hz, 1H), 7.52 (td,  $J = 8.4, 2.2$  Hz, 1H).

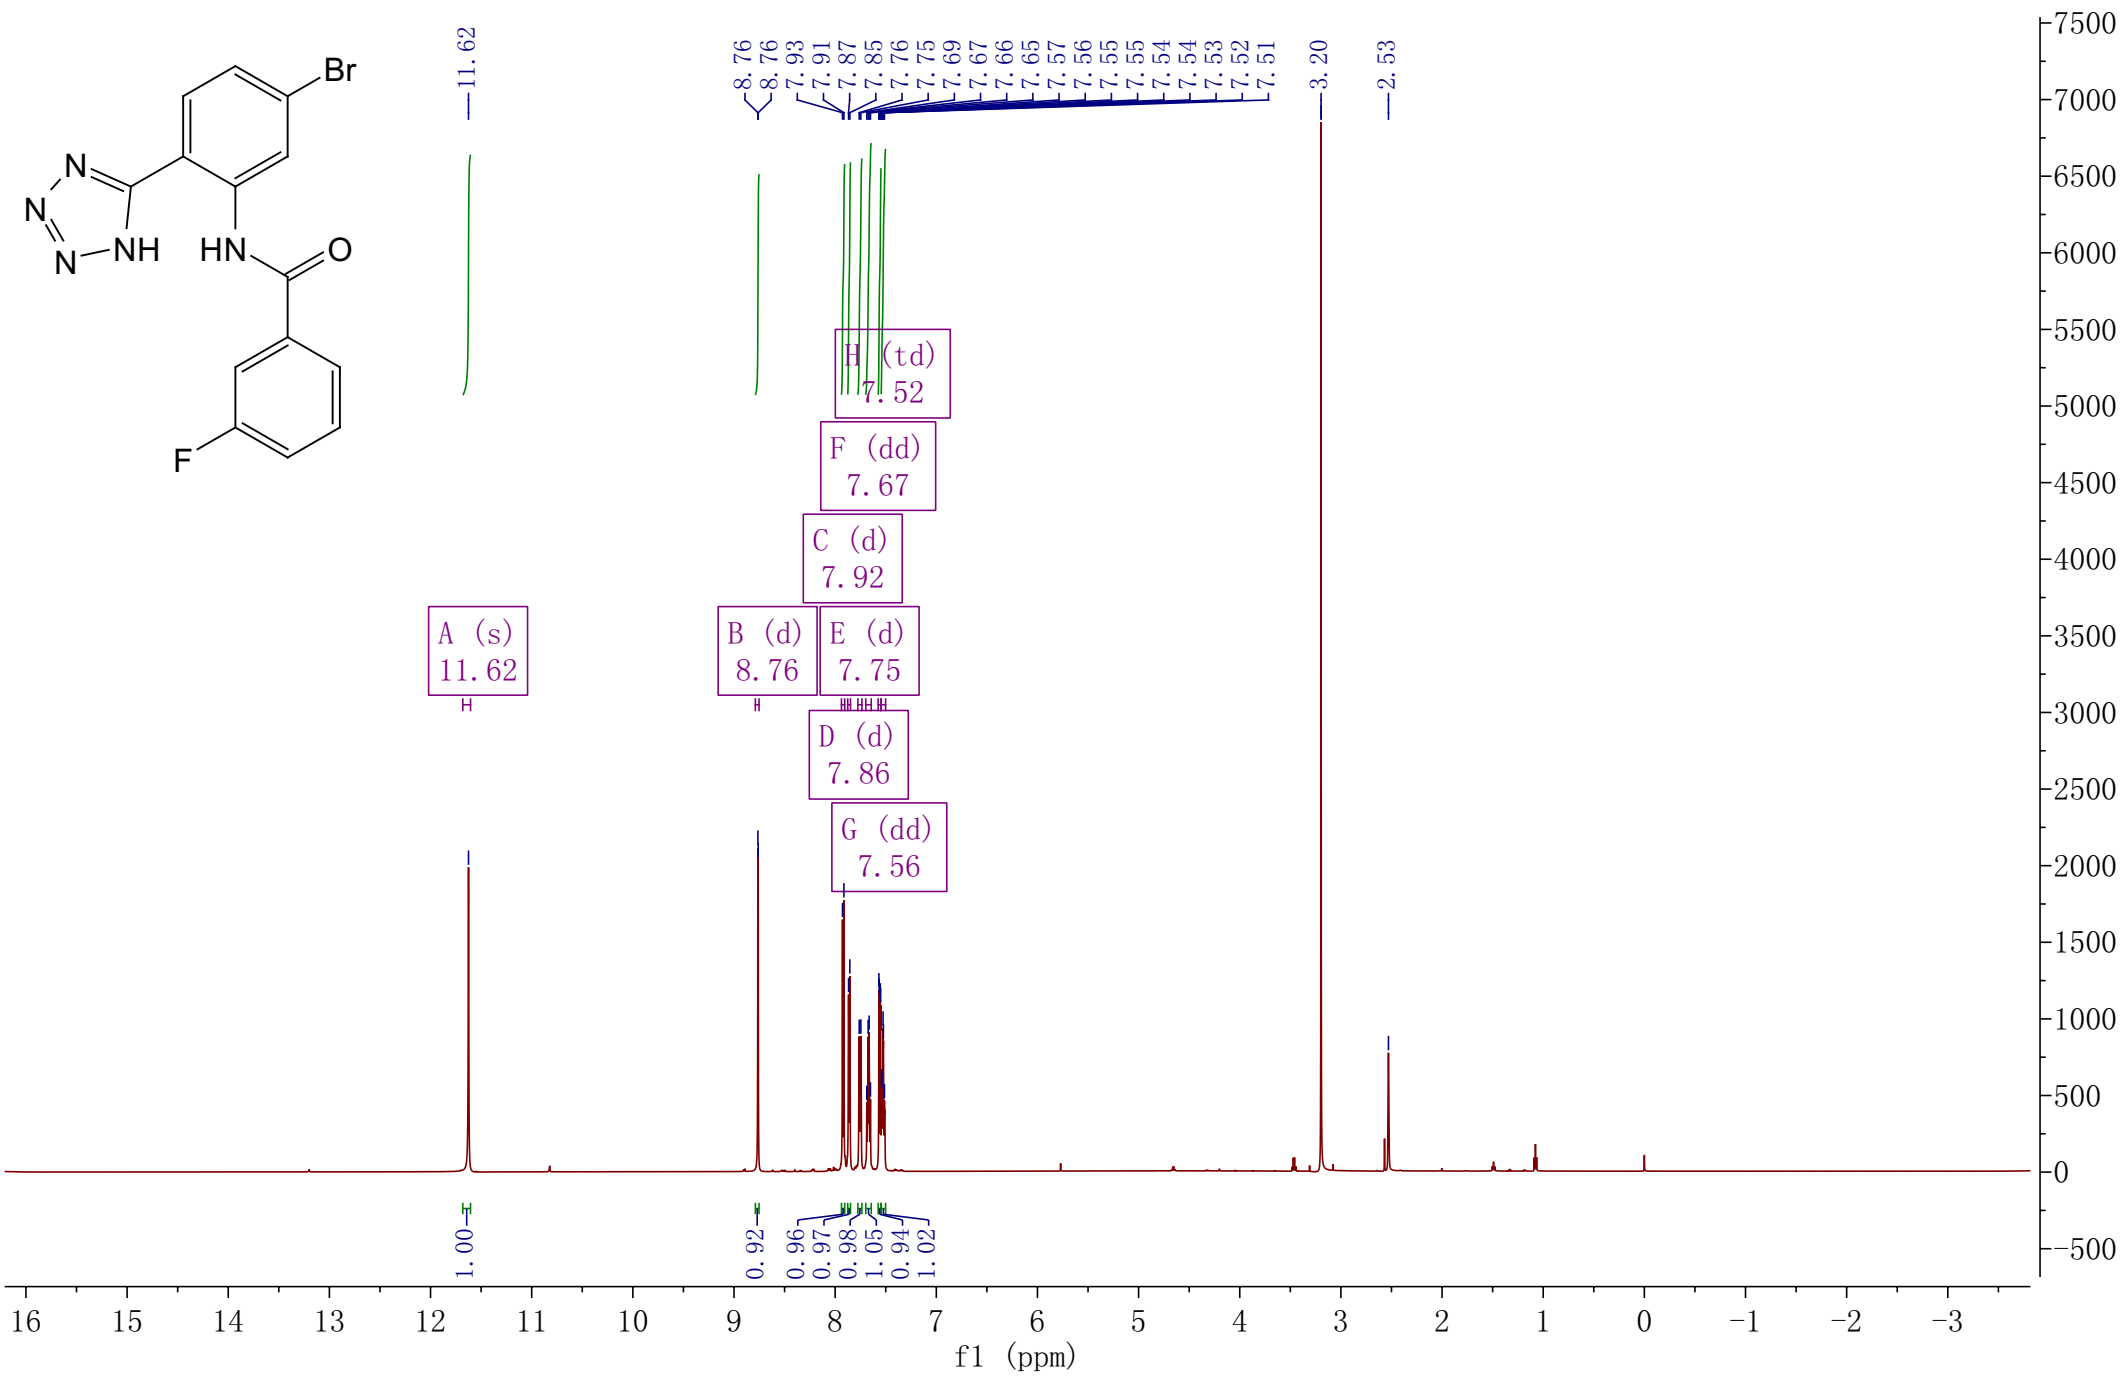

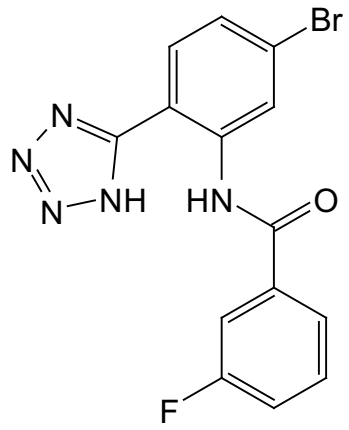

- 164.22
- 164.21
- 163.40
- 161.78
- 154.89
- 138.39
- 136.73
- 136.68
- 131.60
- 131.55
- 130.53
- 127.60
- 125.43
- 124.48
- 123.81
- 123.79
- 119.86
- 119.72
- 114.82
- 114.67
- 113.08

- 49.06
- 40.37
- 40.23
- 40.09
- 39.95
- 39.81
- 39.67
- 39.53

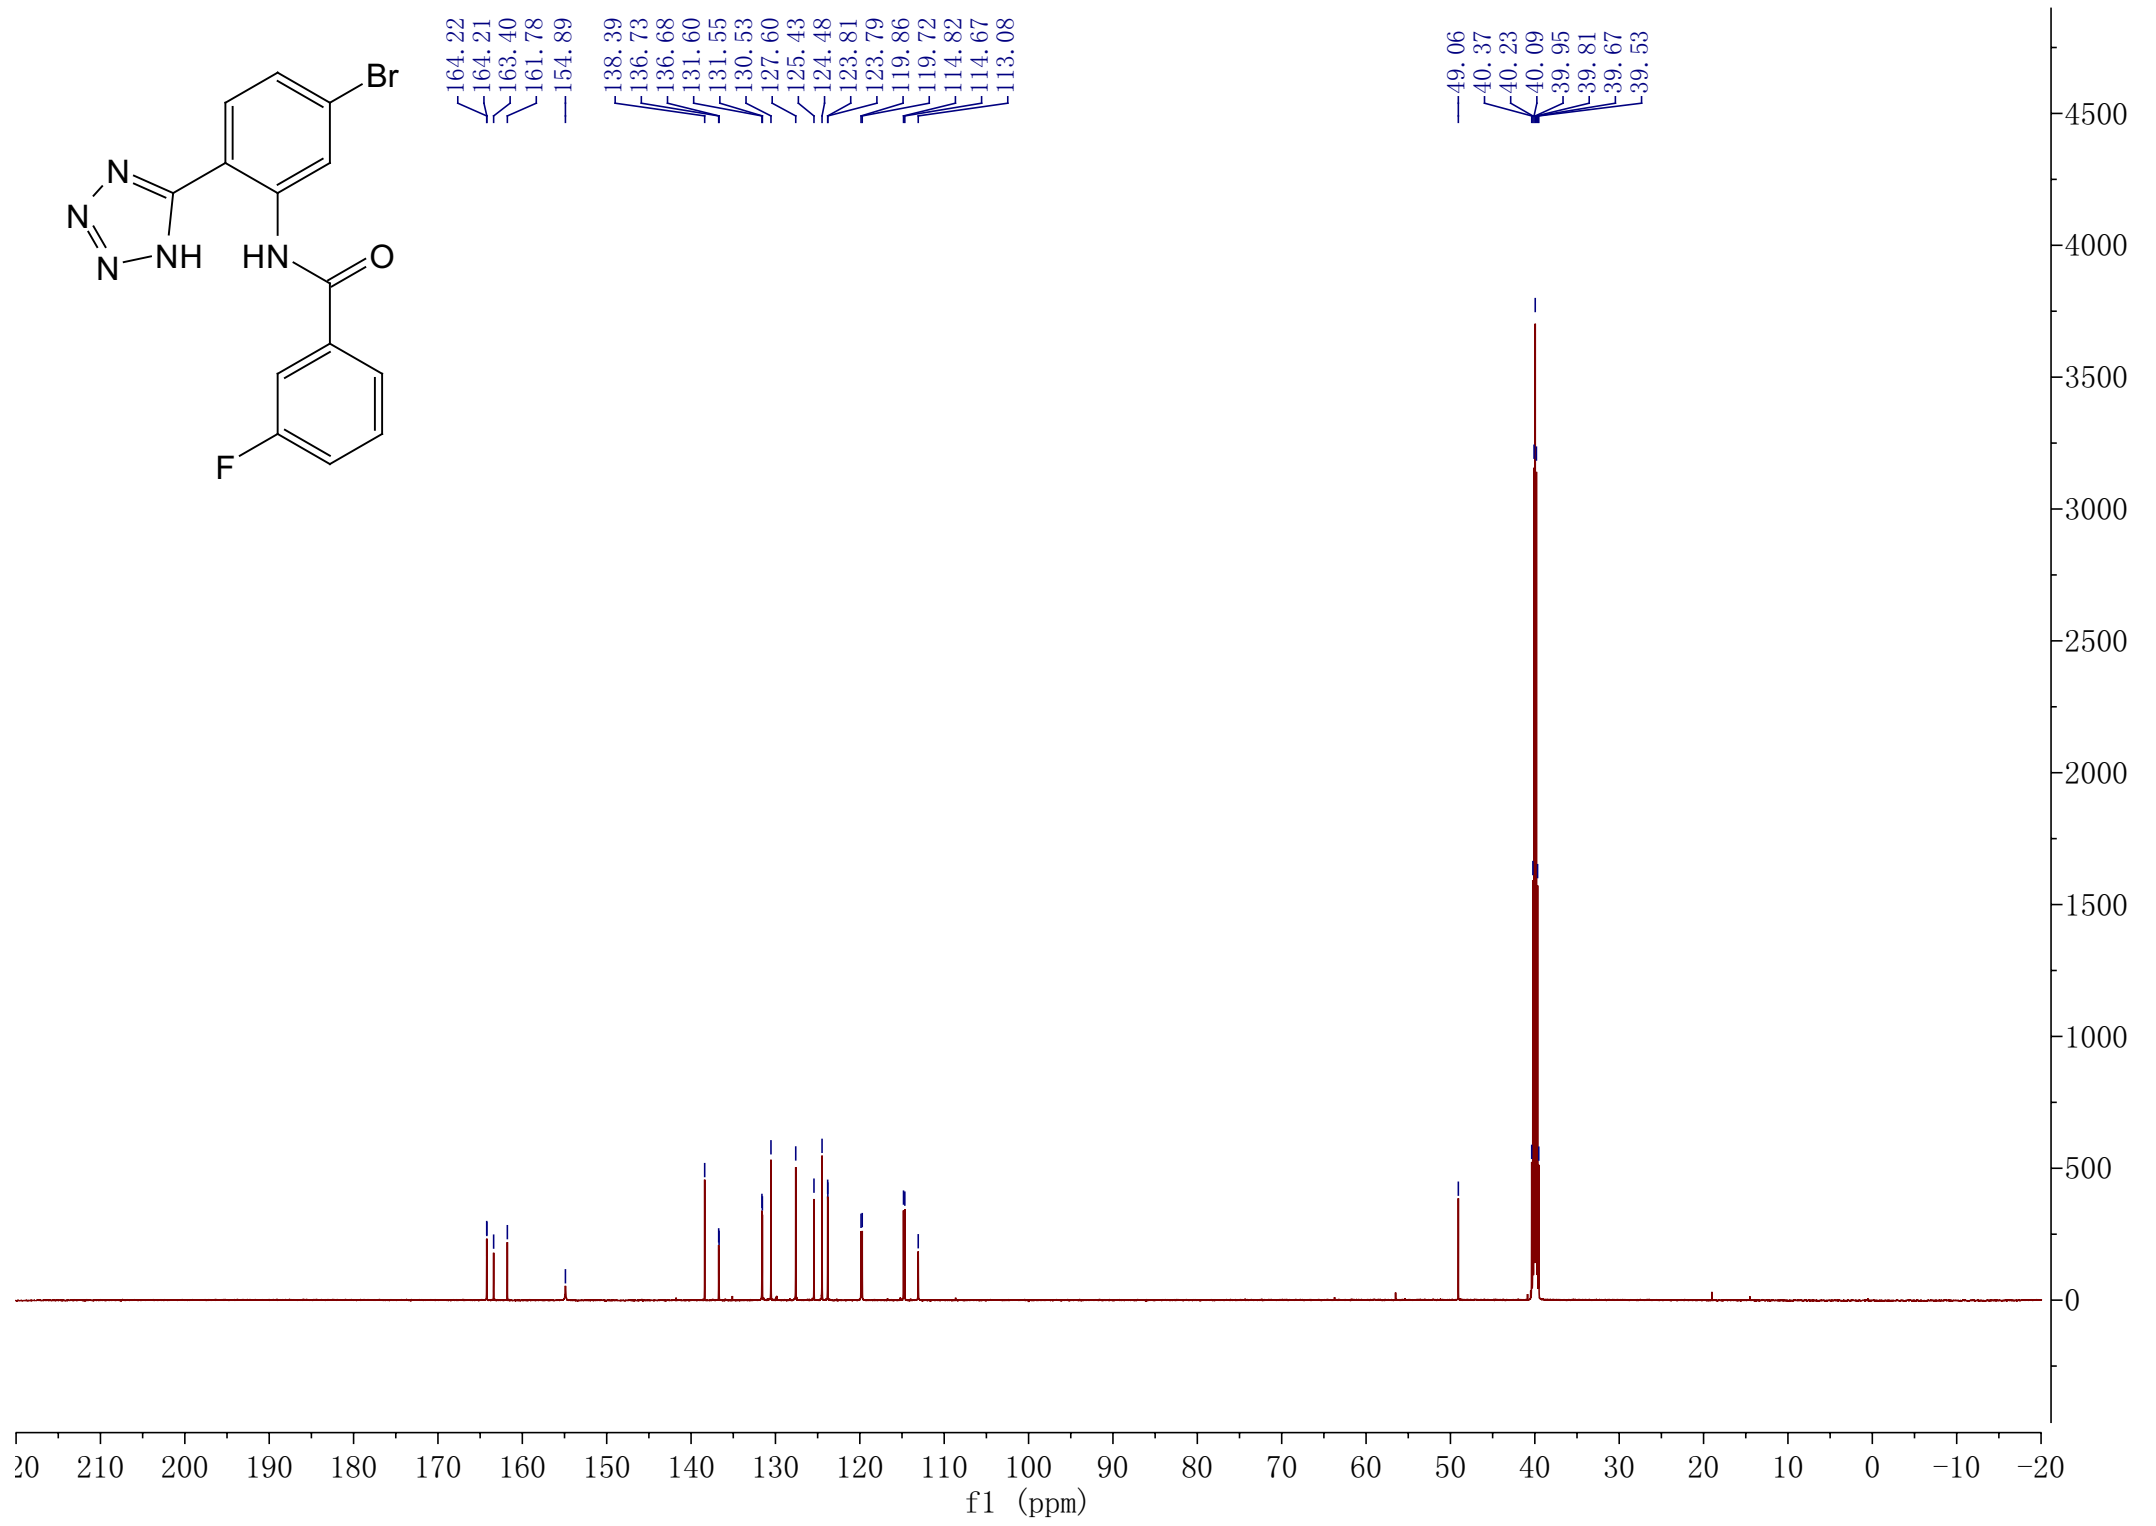



$^1\text{H}$  NMR (600 MHz, DMSO)  $\delta$  11.61 (s, 1H), 8.80 (d,  $J = 2.0$  Hz, 1H), 8.13 – 8.09 (m, 2H), 7.95 (d,  $J = 8.4$  Hz, 1H), 7.60 (dd,  $J = 8.4, 2.0$  Hz, 1H), 7.49 – 7.44 (m, 2H).

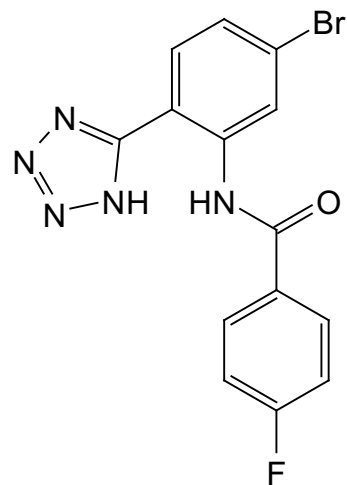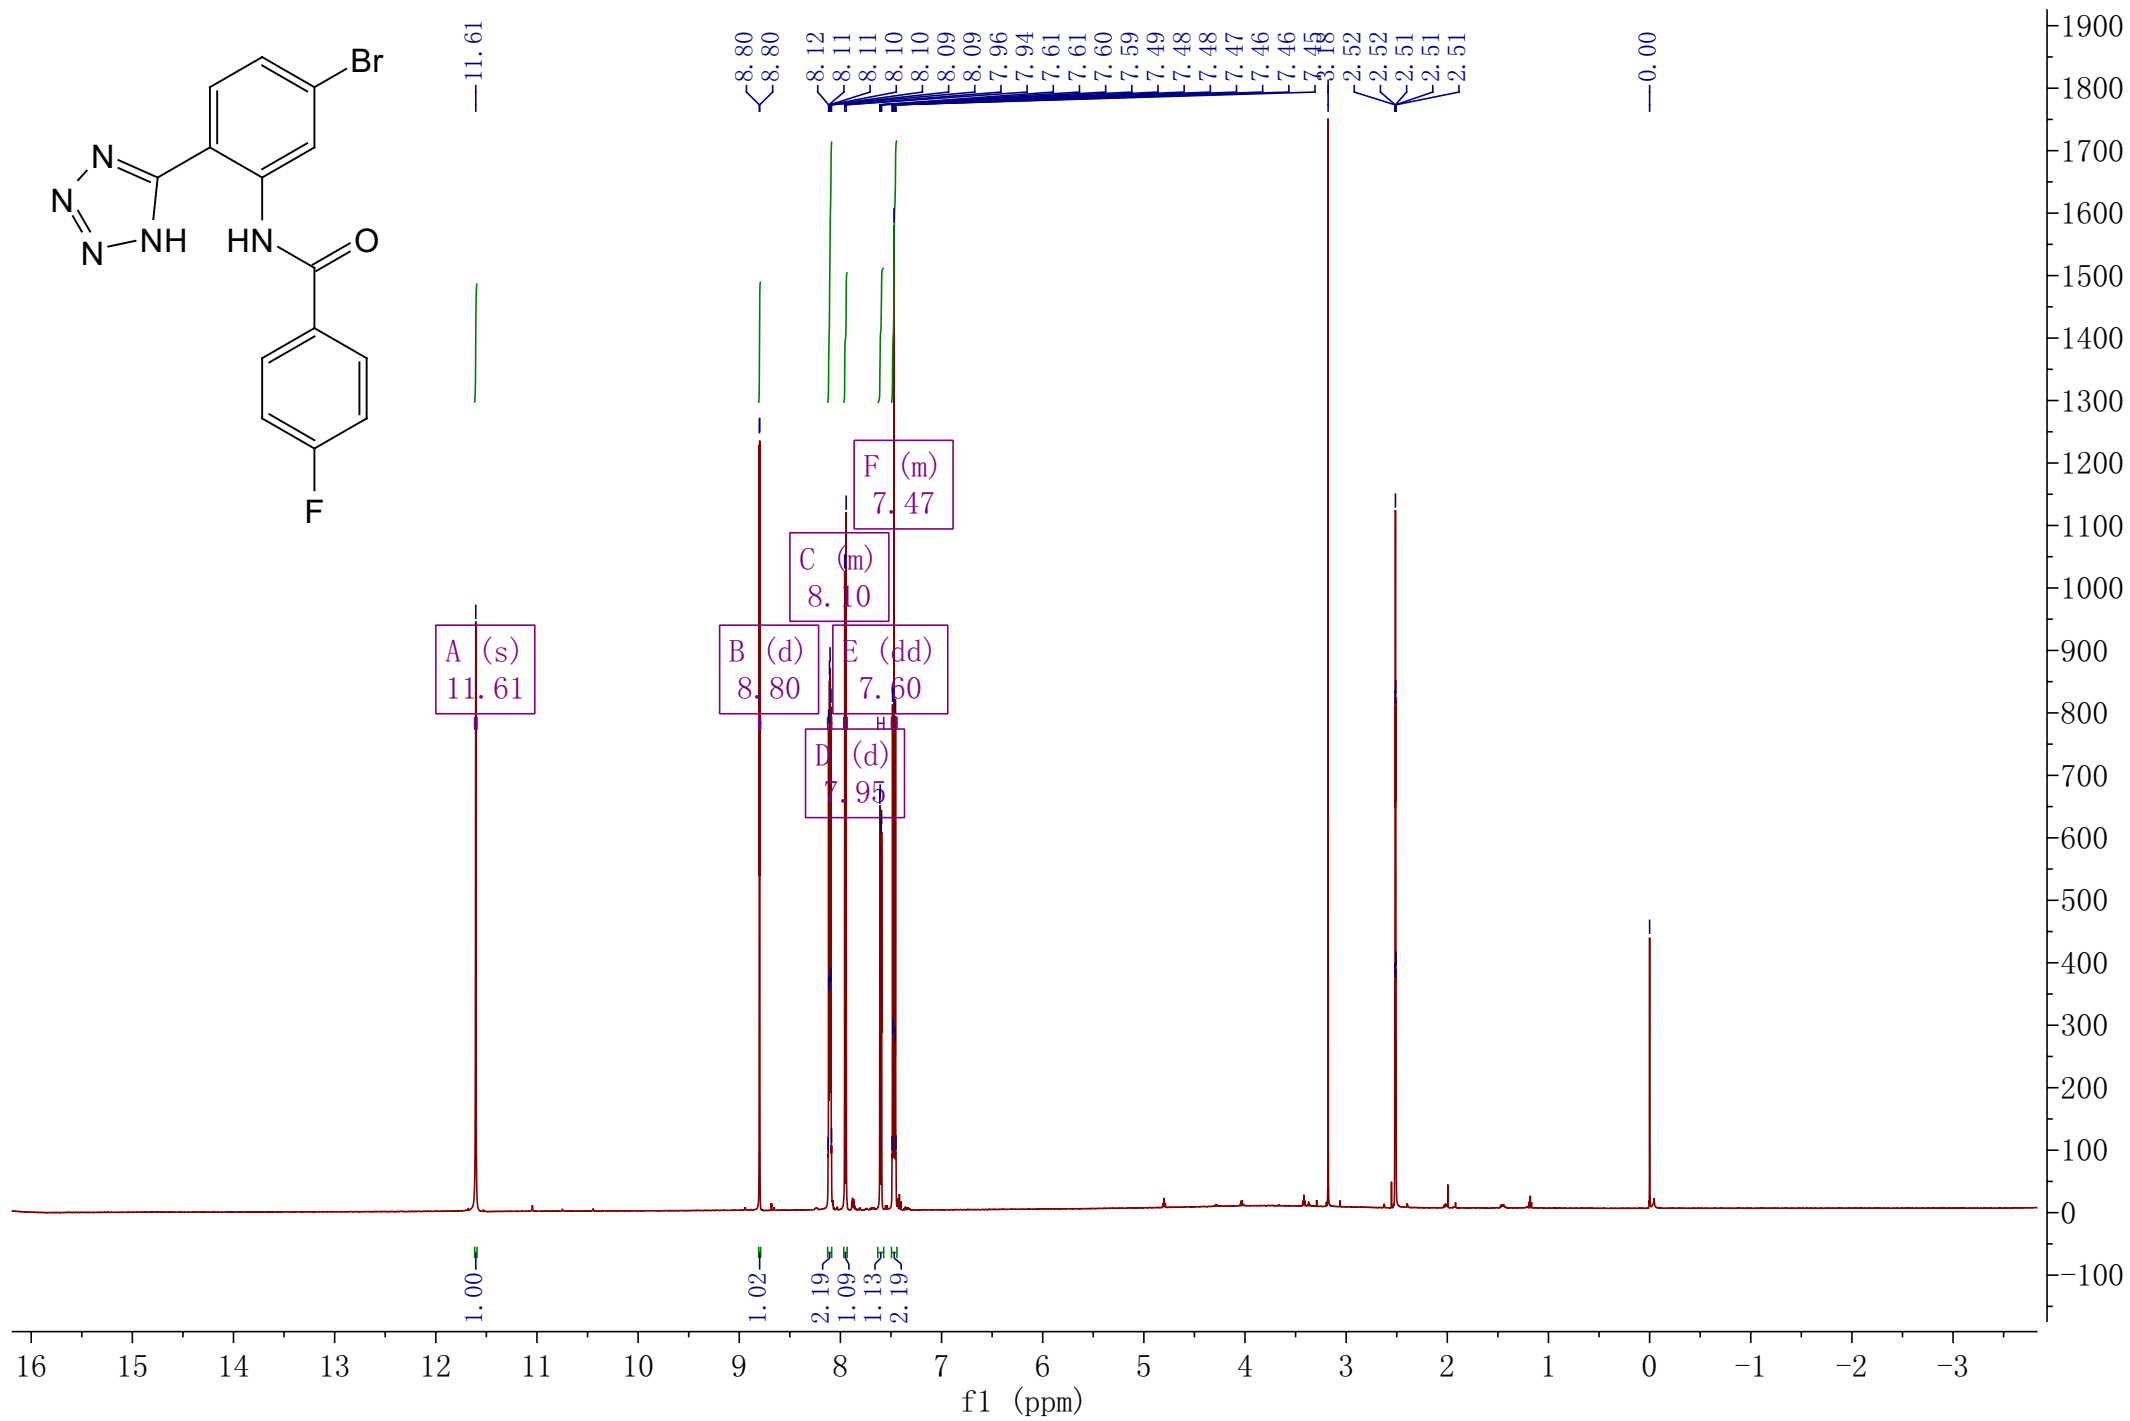

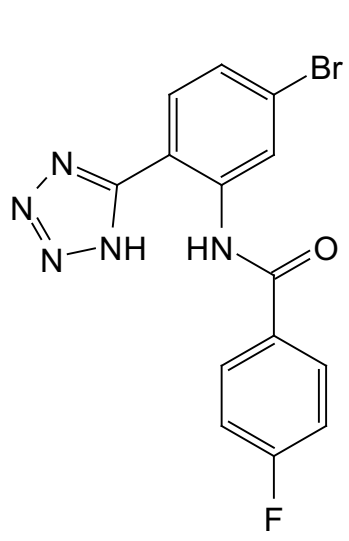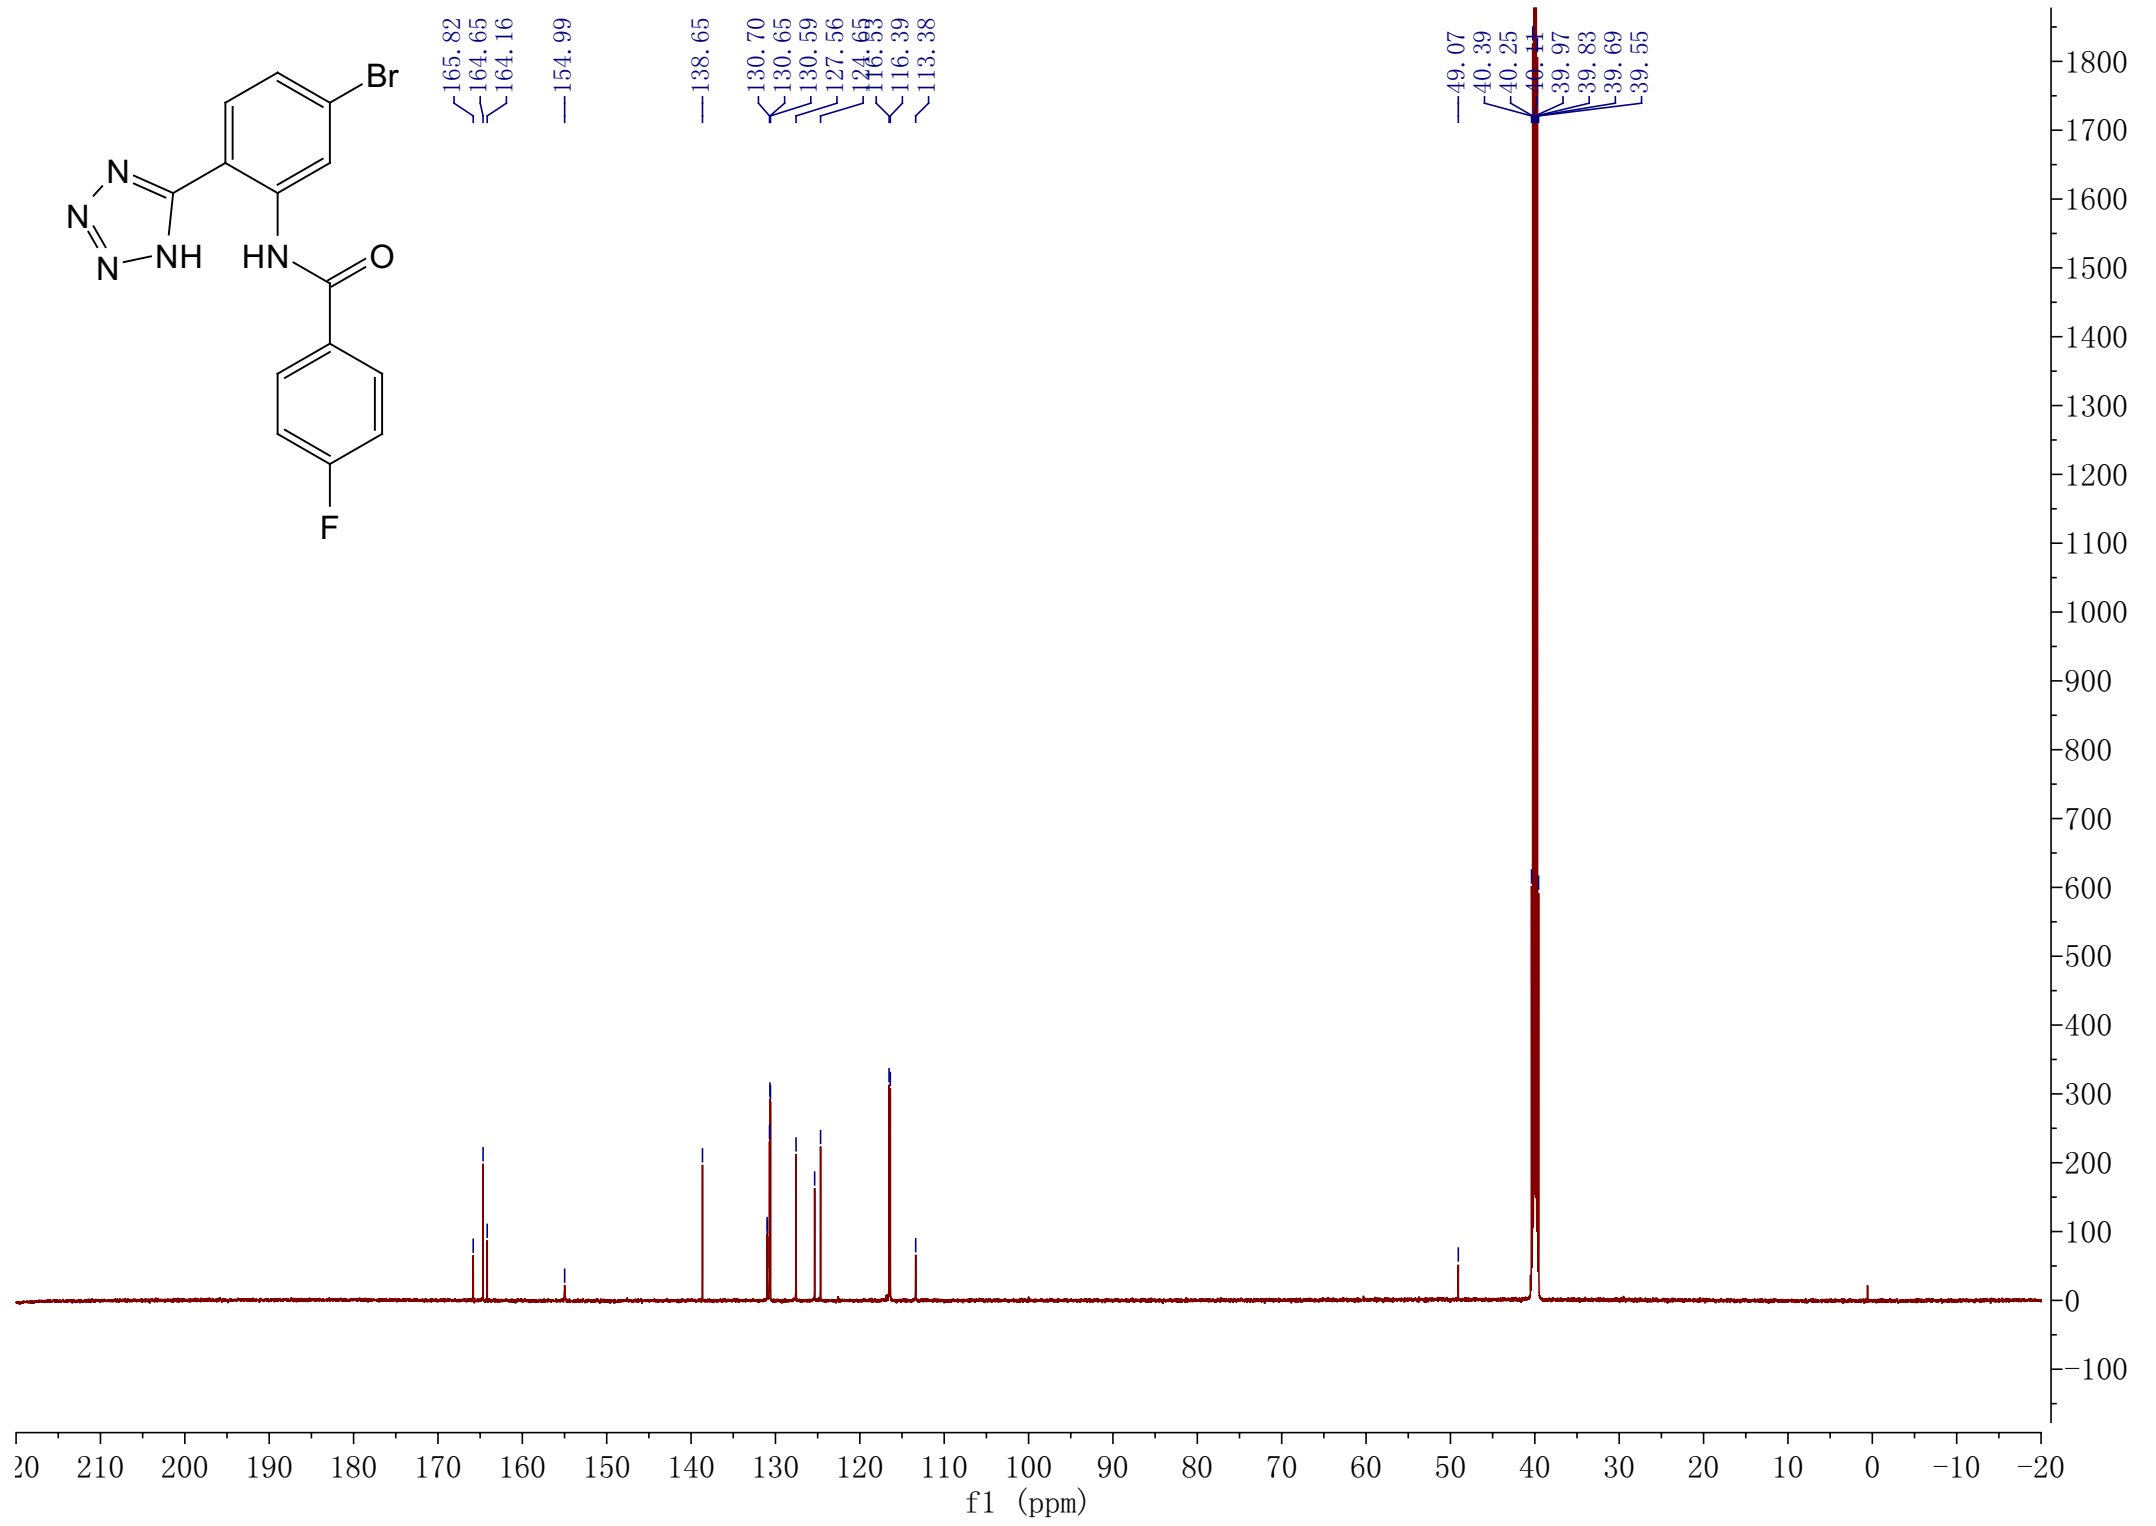

$^1\text{H}$  NMR (600 MHz, DMSO)  $\delta$  11.43 (d,  $J = 2.1$  Hz, 1H), 8.75 (s, 1H), 7.99 (dd,  $J = 15.3, 8.4$  Hz, 1H), 7.94 (d,  $J = 8.4$  Hz, 1H), 7.63 (dd,  $J = 8.4, 1.6$  Hz, 1H), 7.56 – 7.50 (m, 1H), 7.32 (td,  $J = 8.5, 1.9$  Hz, 1H).

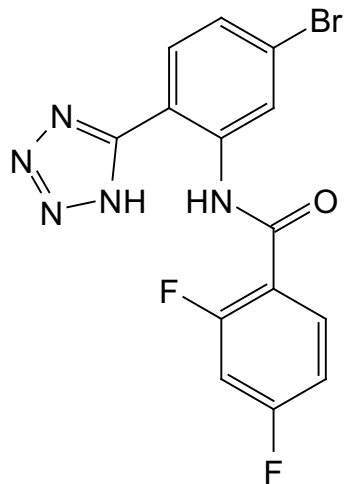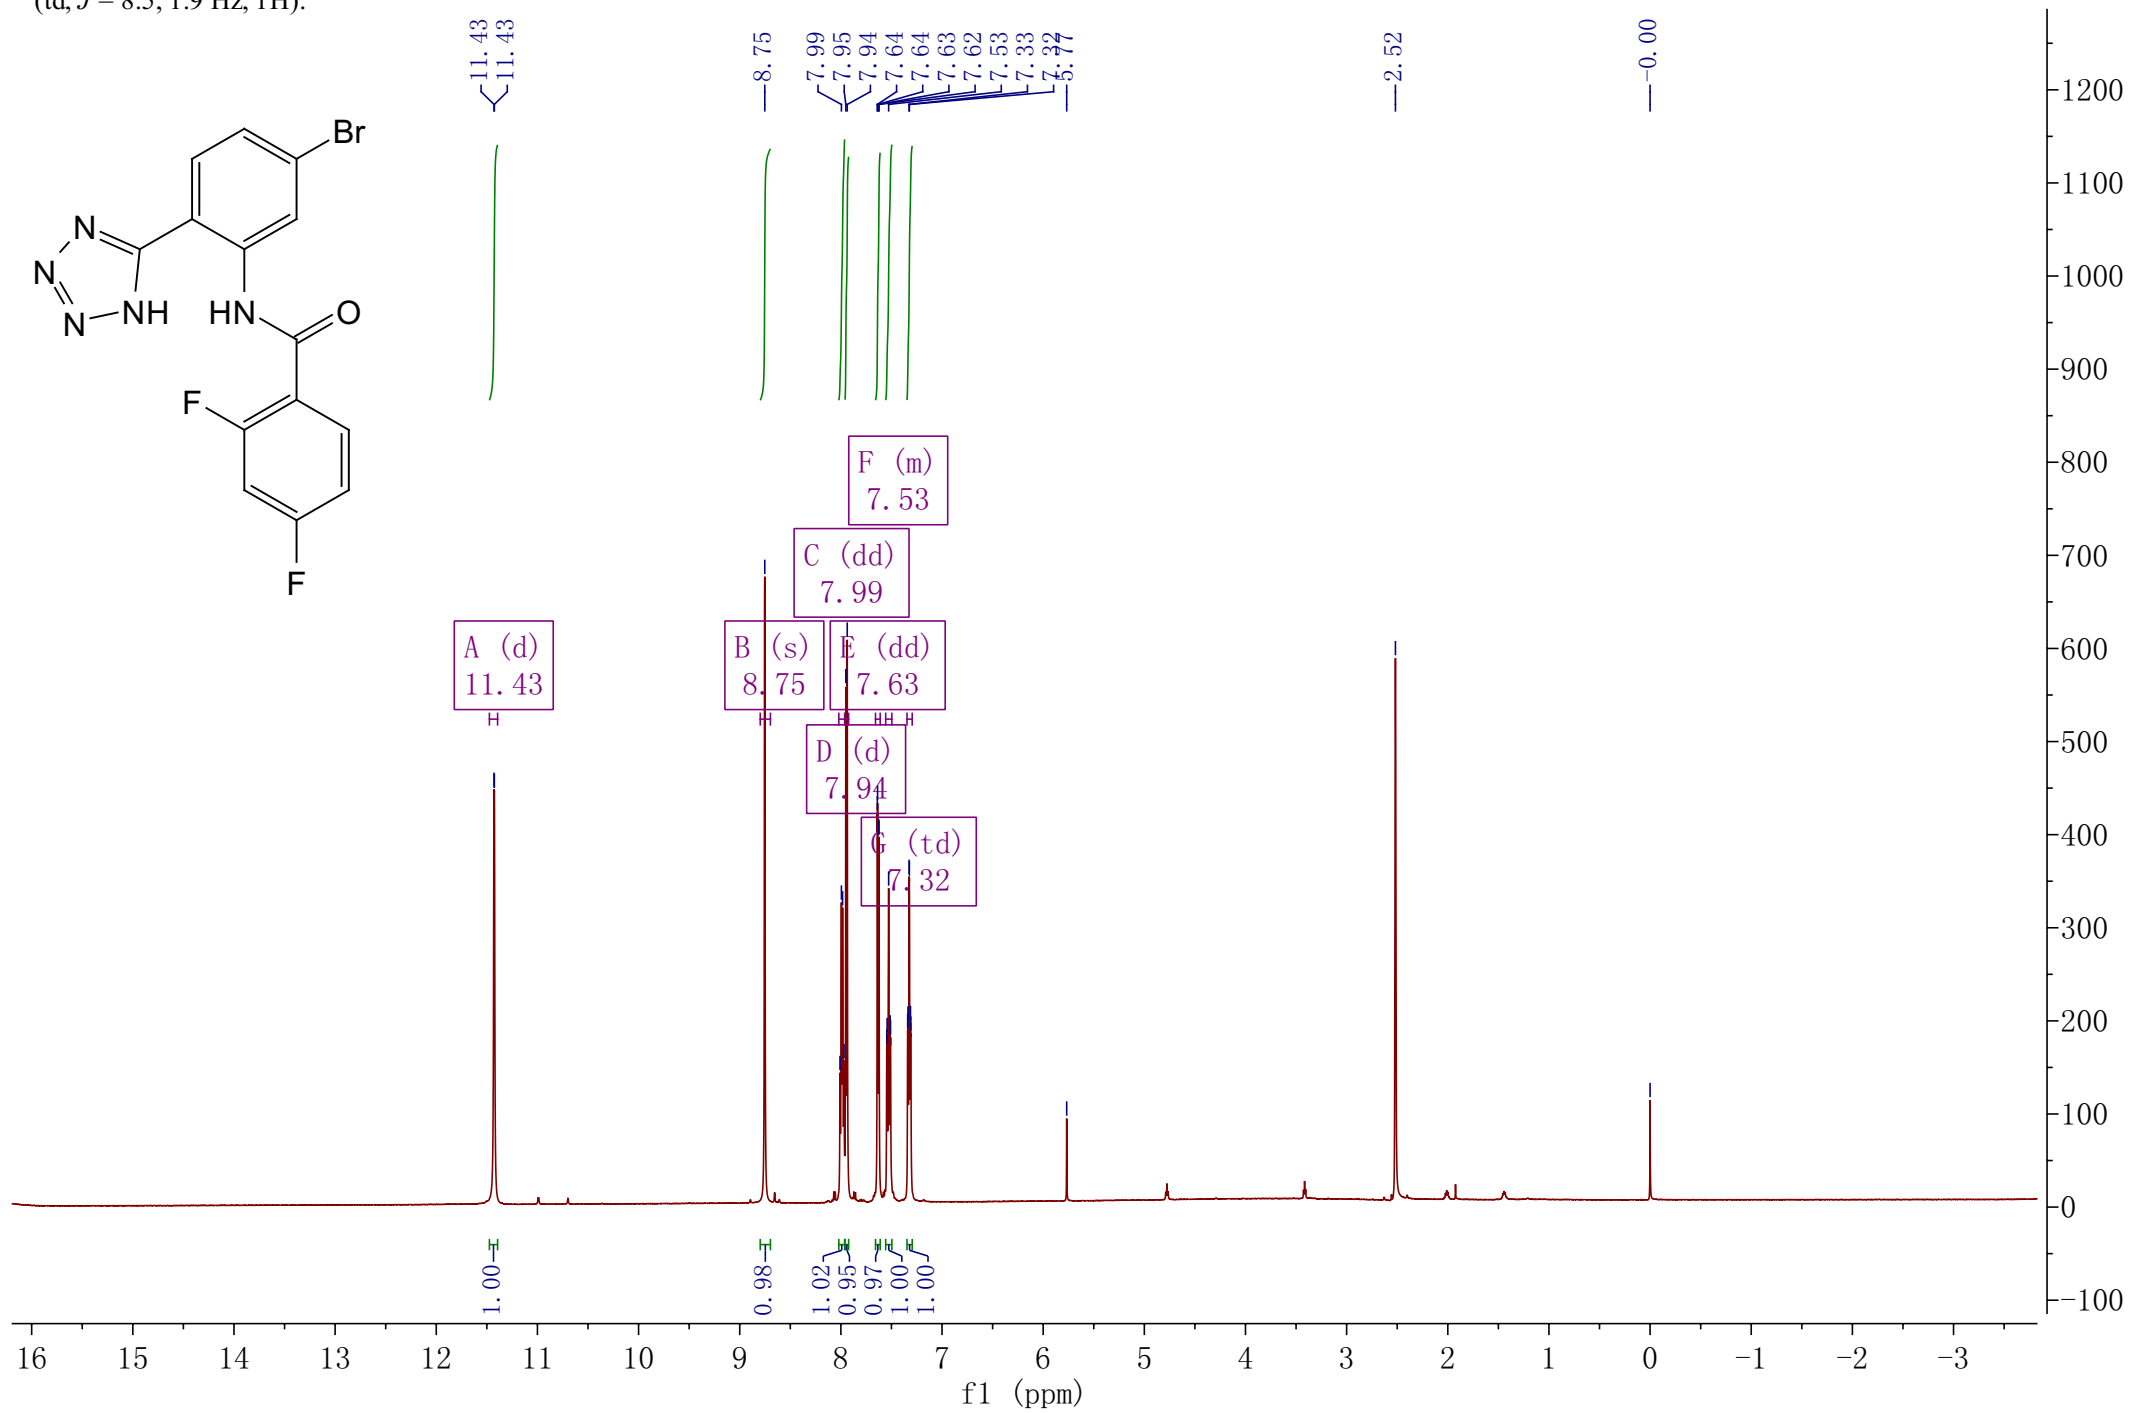

$^{13}\text{C}$  NMR (151 MHz, DMSO)  $\delta$  163.71 (dd,  $J = 252.4, 12.5$  Hz), 160.93 (d,  $J = 1.8$  Hz), 159.48 (dd,  $J = 253.8, 13.1$  Hz), 153.67 (s), 137.06 (s), 131.97 (dd,  $J = 10.6, 3.4$  Hz), 129.86 (s), 126.91 (s), 124.16 (d,  $J = 7.1$  Hz), 118.92 (dd,  $J = 12.8, 3.6$  Hz), 112.68 (s), 111.90 (dd,  $J = 21.7, 3.4$  Hz), 104.57 (t,  $J = 26.6$  Hz).

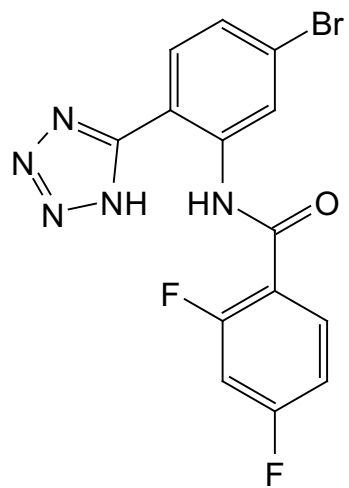

164.59  
164.51  
162.92  
162.83  
162.83  
160.94  
160.92  
160.37  
160.28  
158.68  
158.60  
153.67

137.06  
131.99  
131.95  
129.86  
126.91  
124.18  
124.14  
111.98  
111.96  
111.84  
111.82  
104.74  
104.57  
104.39

39.34  
39.20  
39.06  
38.92  
38.78  
38.64  
38.50

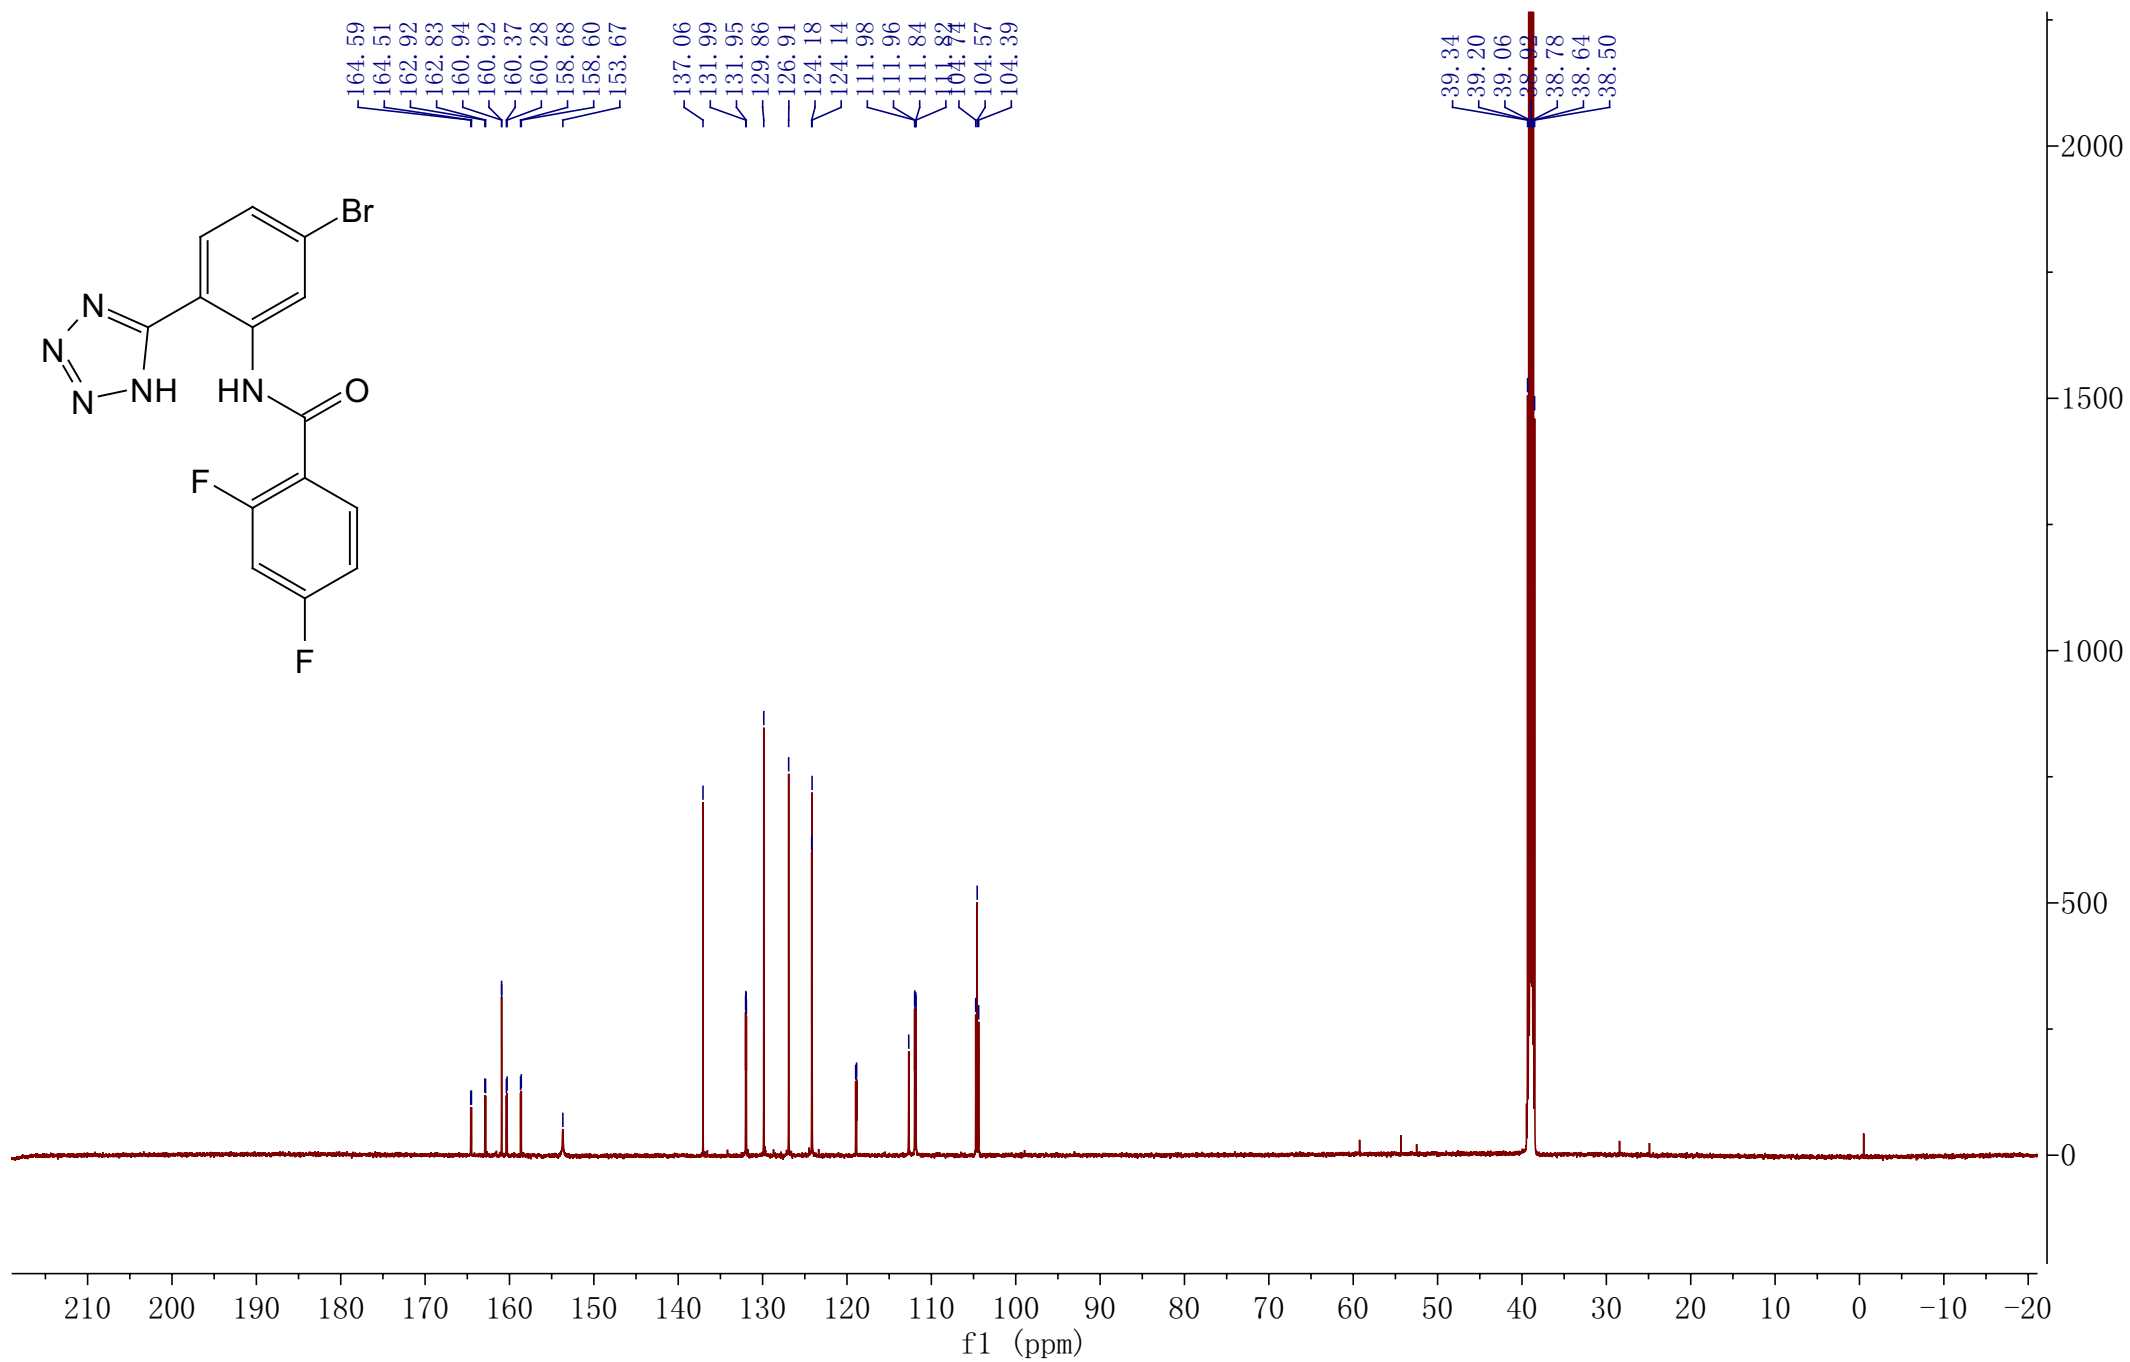

$^1\text{H}$  NMR (600 MHz, DMSO)  $\delta$  11.83 (s, 1H), 9.00 (d,  $J = 1.9$  Hz, 1H), 7.97 (dd,  $J = 7.8, 1.8$  Hz, 1H), 7.89 (d,  $J = 8.4$  Hz, 1H), 7.63 – 7.57 (m, 2H), 7.27 (d,  $J = 8.1$  Hz, 1H), 7.13 (td,  $J = 7.8, 0.9$  Hz, 1H), 4.02 (s, 3H).

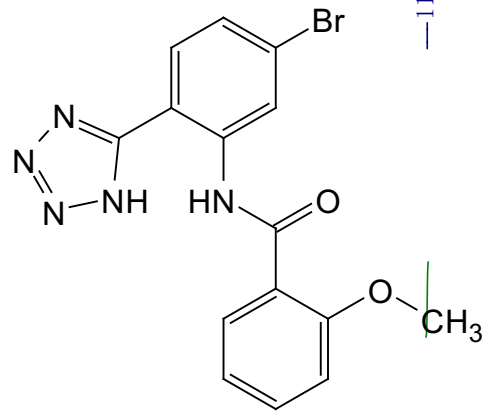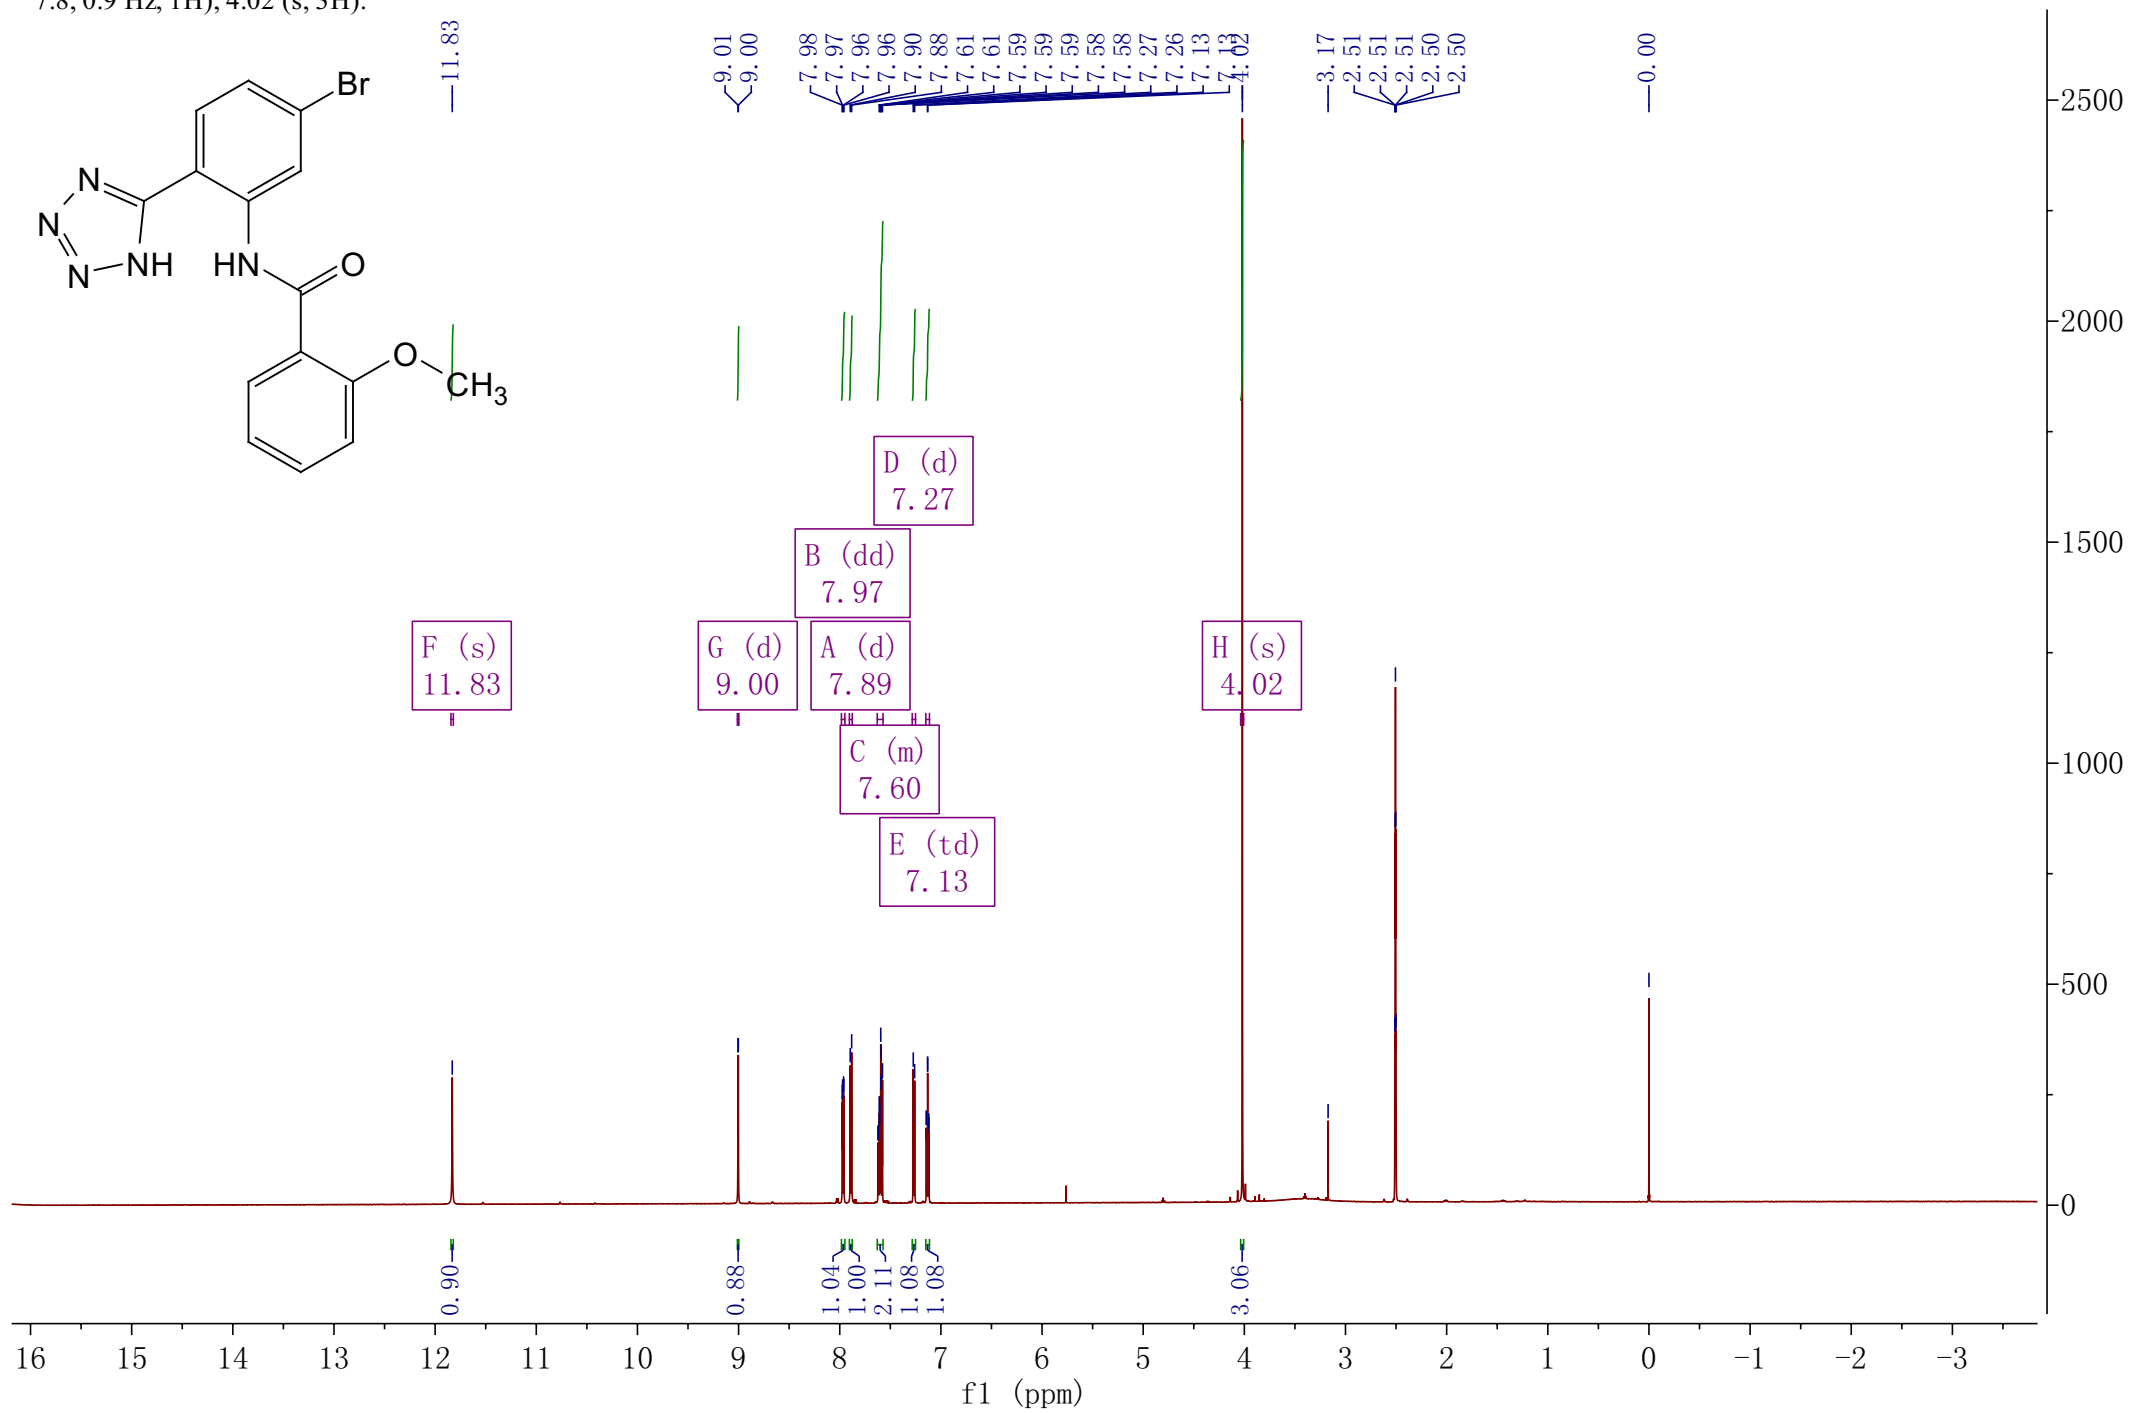

$^{13}\text{C}$  NMR (151 MHz, DMSO)  $\delta$  164.55, 157.56, 138.59, 134.40, 131.88, 131.04, 127.16, 125.25, 124.91, 122.09, 121.33, 112.73, 56.49, 40.52, 40.40, 40.26, 40.12, 39.98, 39.84, 39.70, 39.56

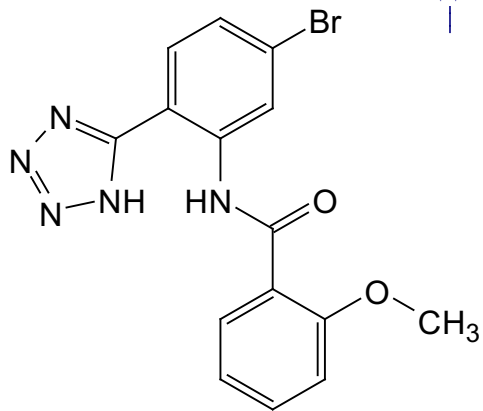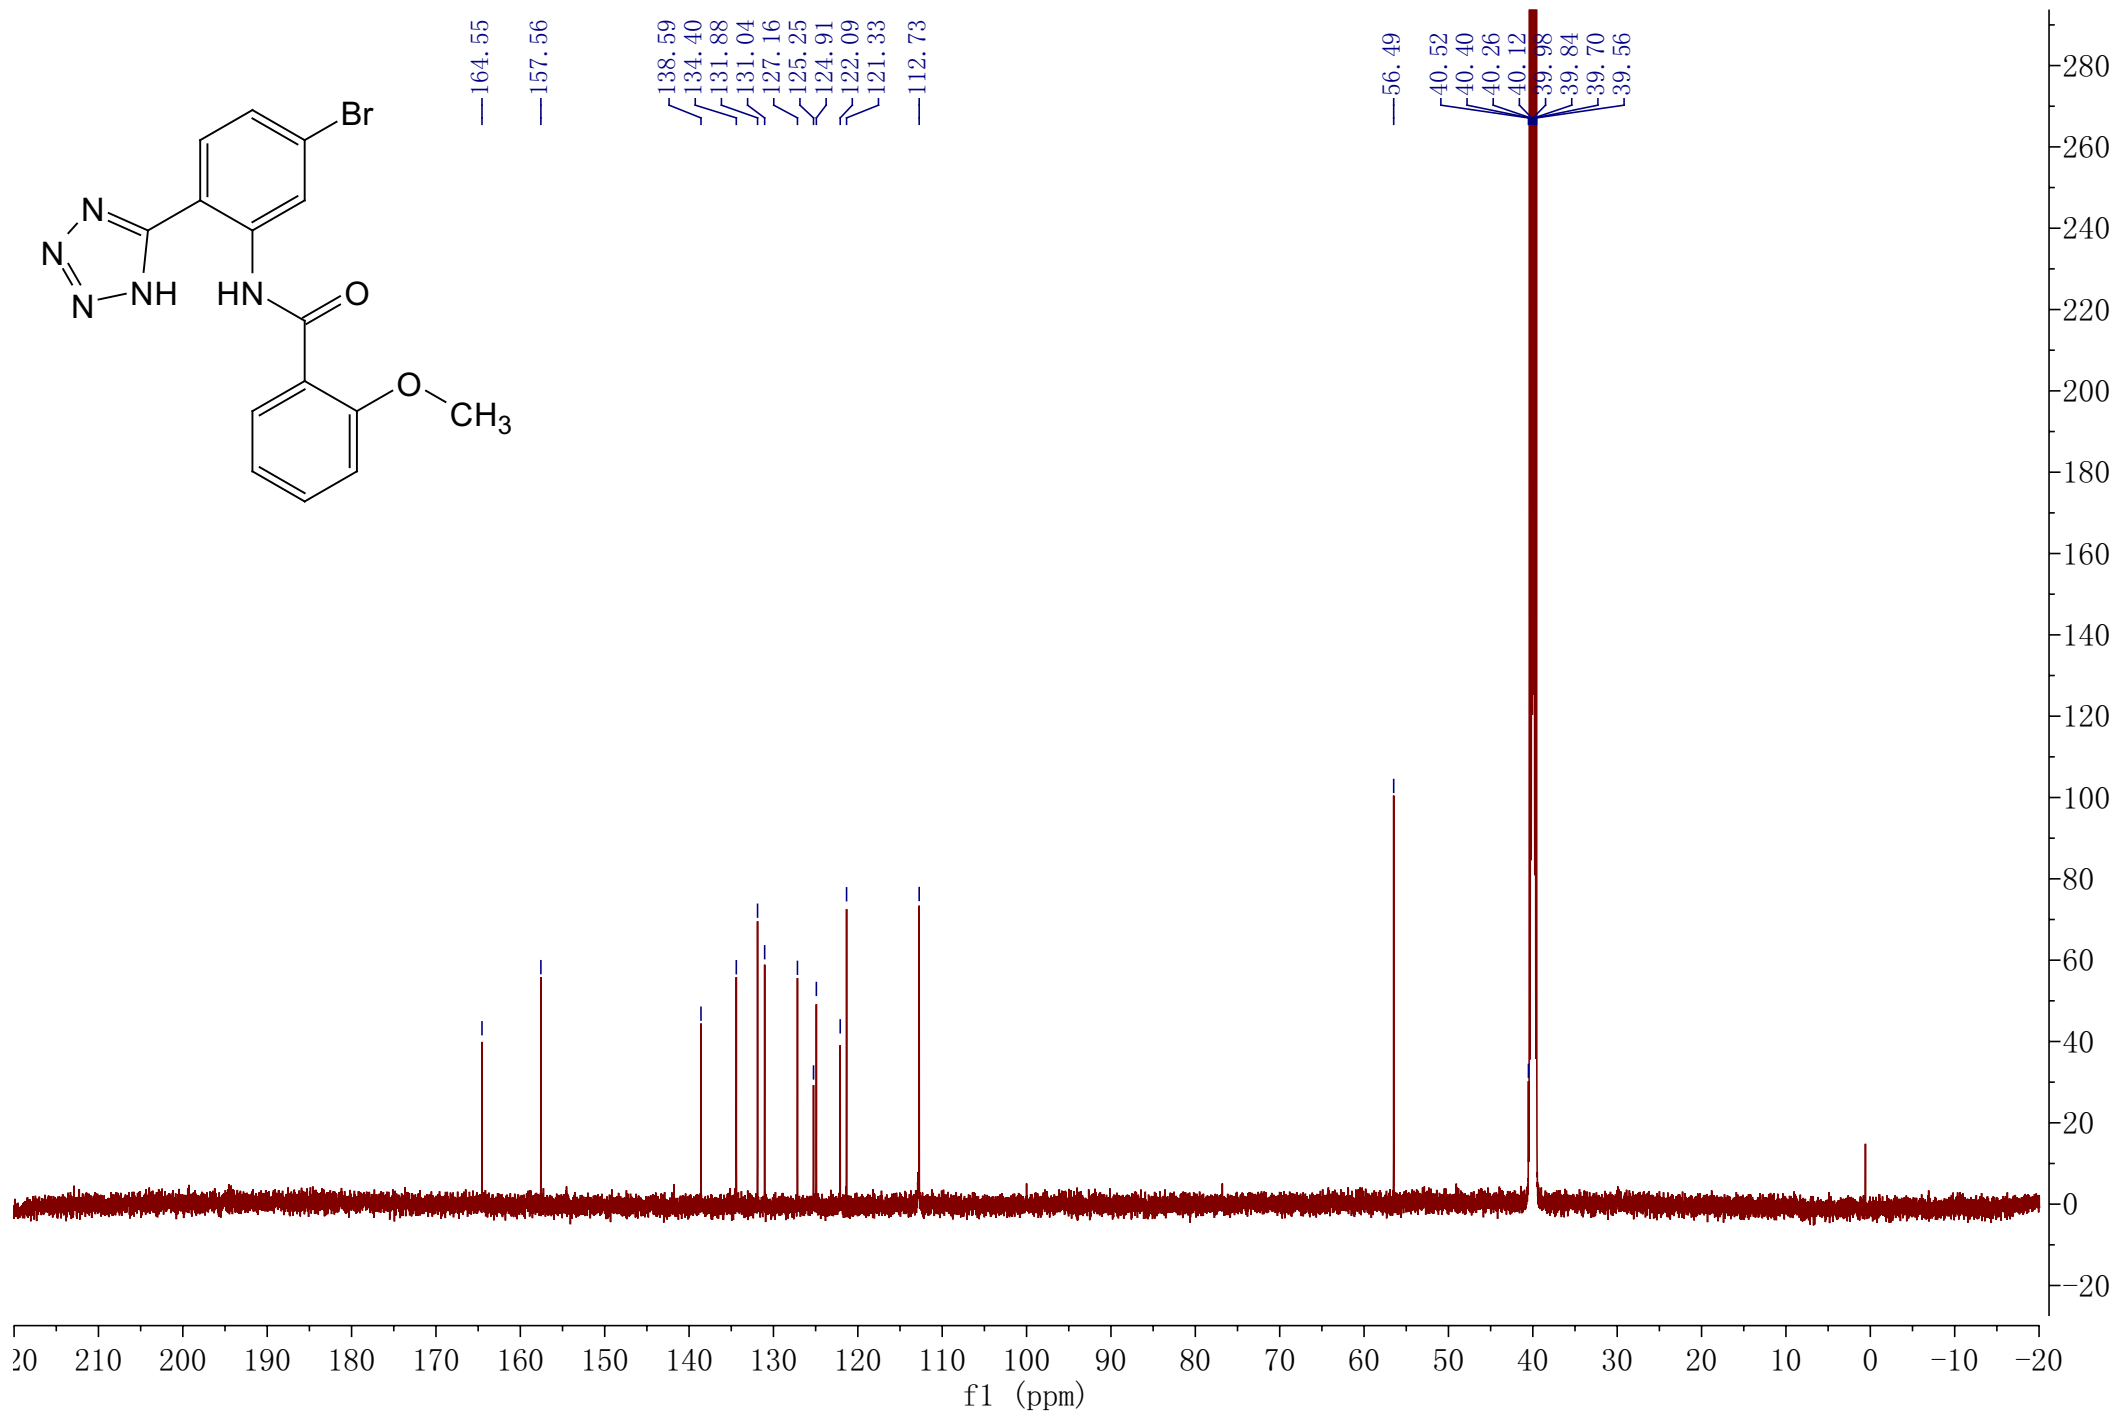

$^1\text{H}$  NMR (600 MHz, DMSO)  $\delta$  11.69 (s, 1H), 8.80 (d,  $J = 2.0$  Hz, 1H), 7.88 (d,  $J = 8.4$  Hz, 1H), 7.56 – 7.51 (m, 2H), 7.49 (dd,  $J = 8.4, 2.0$  Hz, 1H), 7.44 (t,  $J = 7.9$  Hz, 1H), 7.16 – 7.13 (m, 1H), 3.80 (s, 3H).

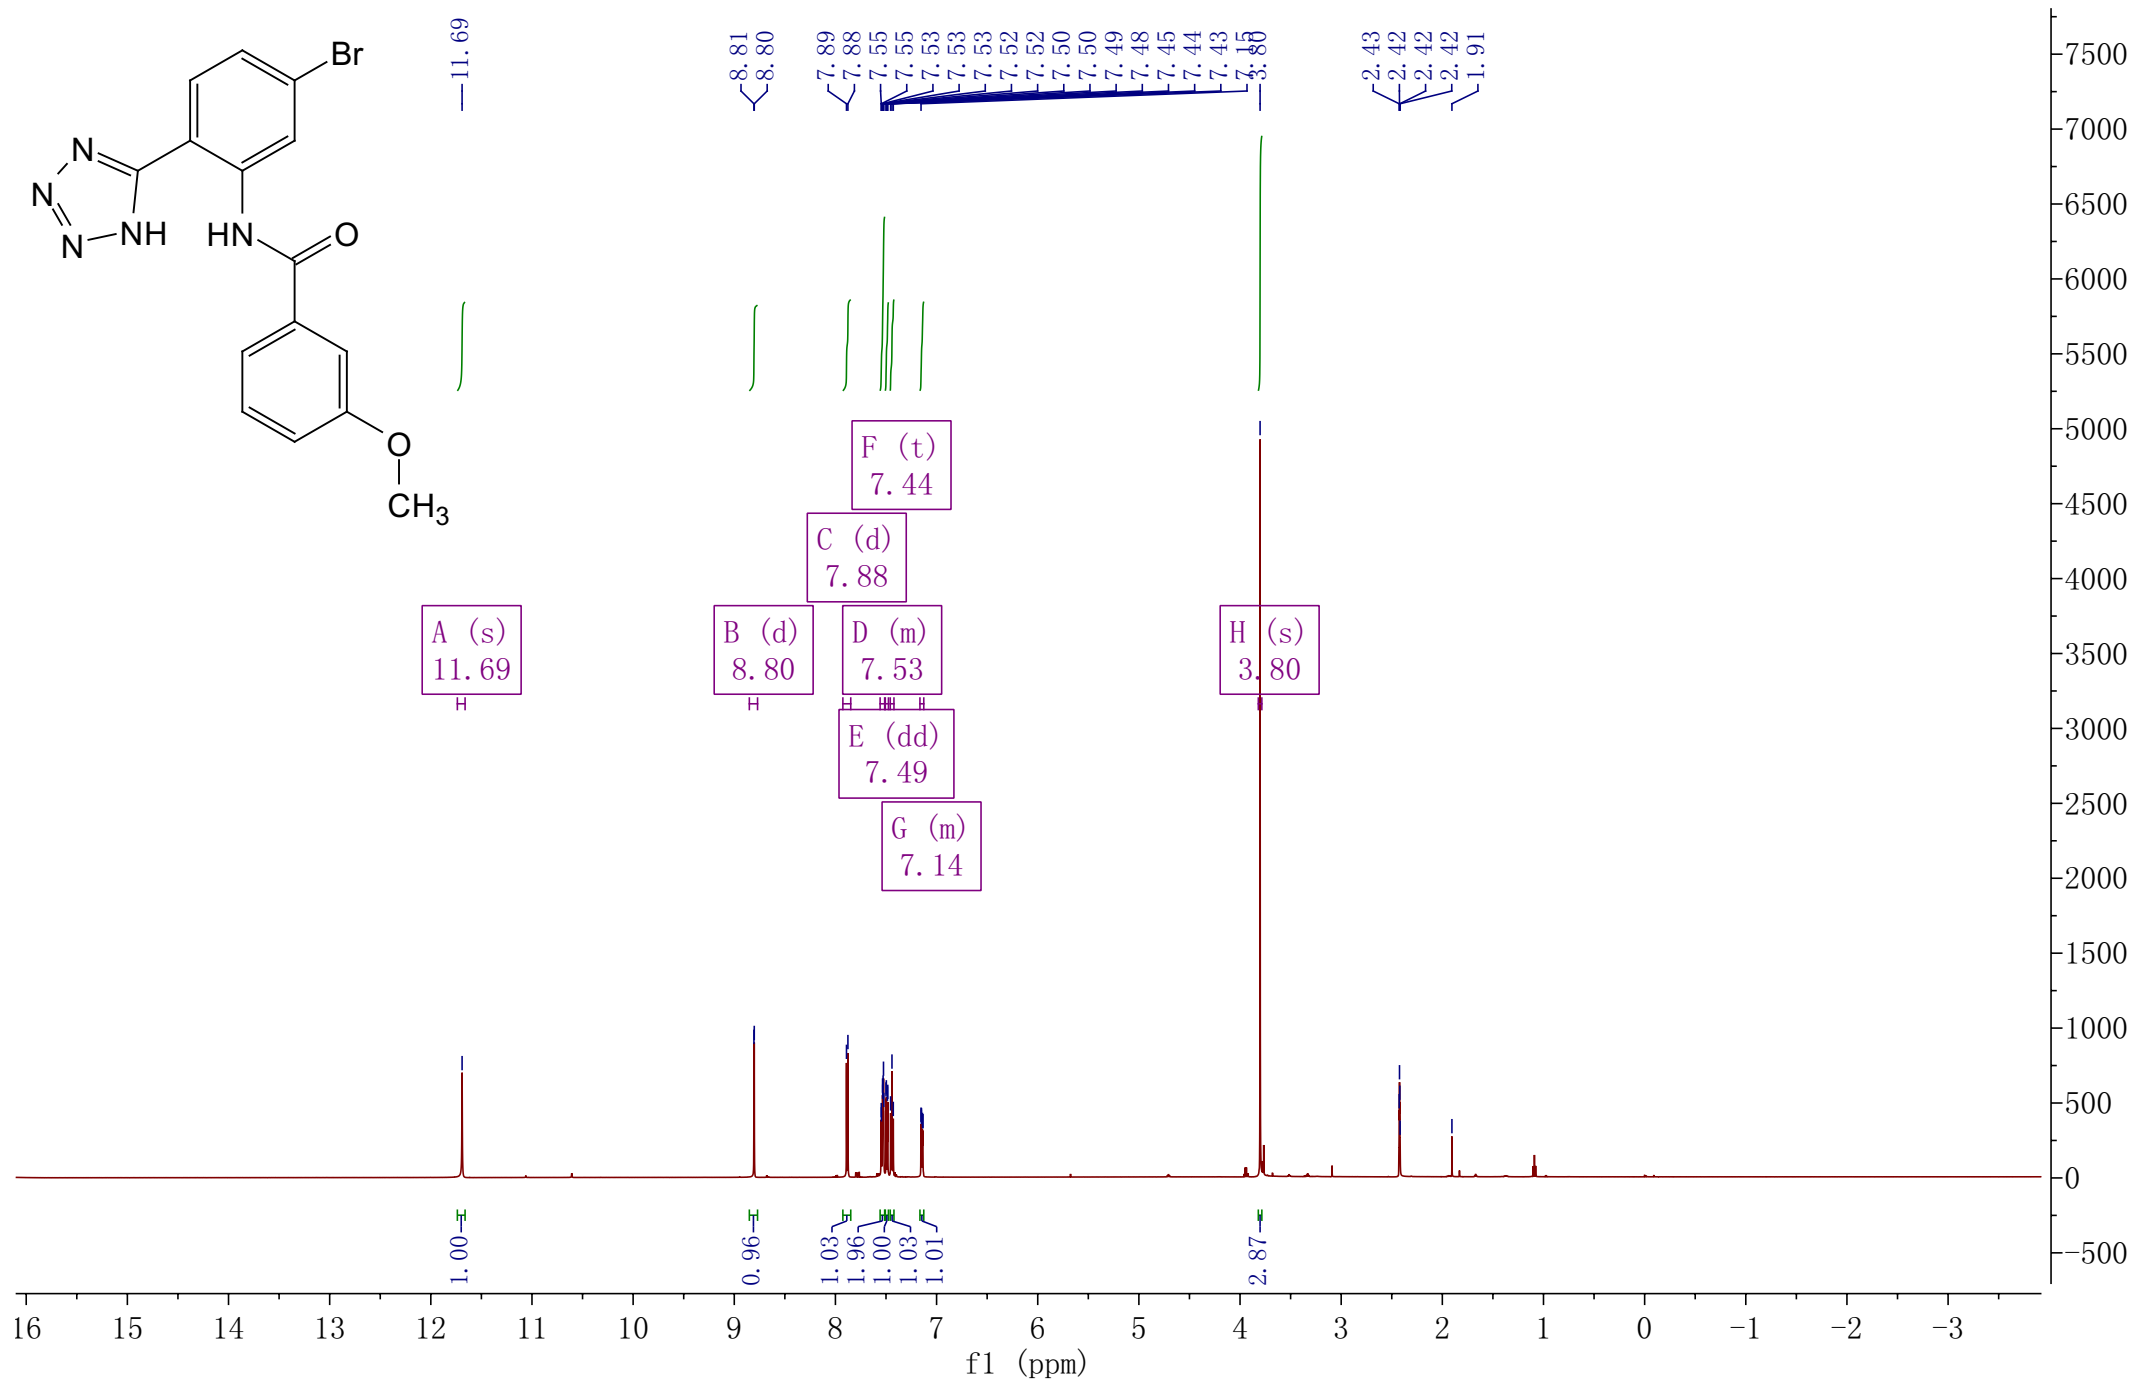

$^{13}\text{C}$  NMR (151 MHz, DMSO)  $\delta$  165.40, 159.96, 155.16, 138.70, 135.85, 130.60, 130.58, 127.32, 125.33, 124.08, 120.01, 118.86, 112.99, 112.79, 55.81.

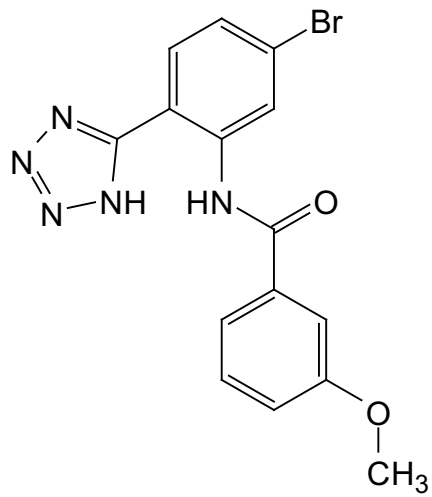

165.40  
159.96  
155.16  
138.70  
135.85  
130.60  
130.58  
127.32  
125.33  
124.08  
120.01  
118.86  
112.99  
112.79  
55.81

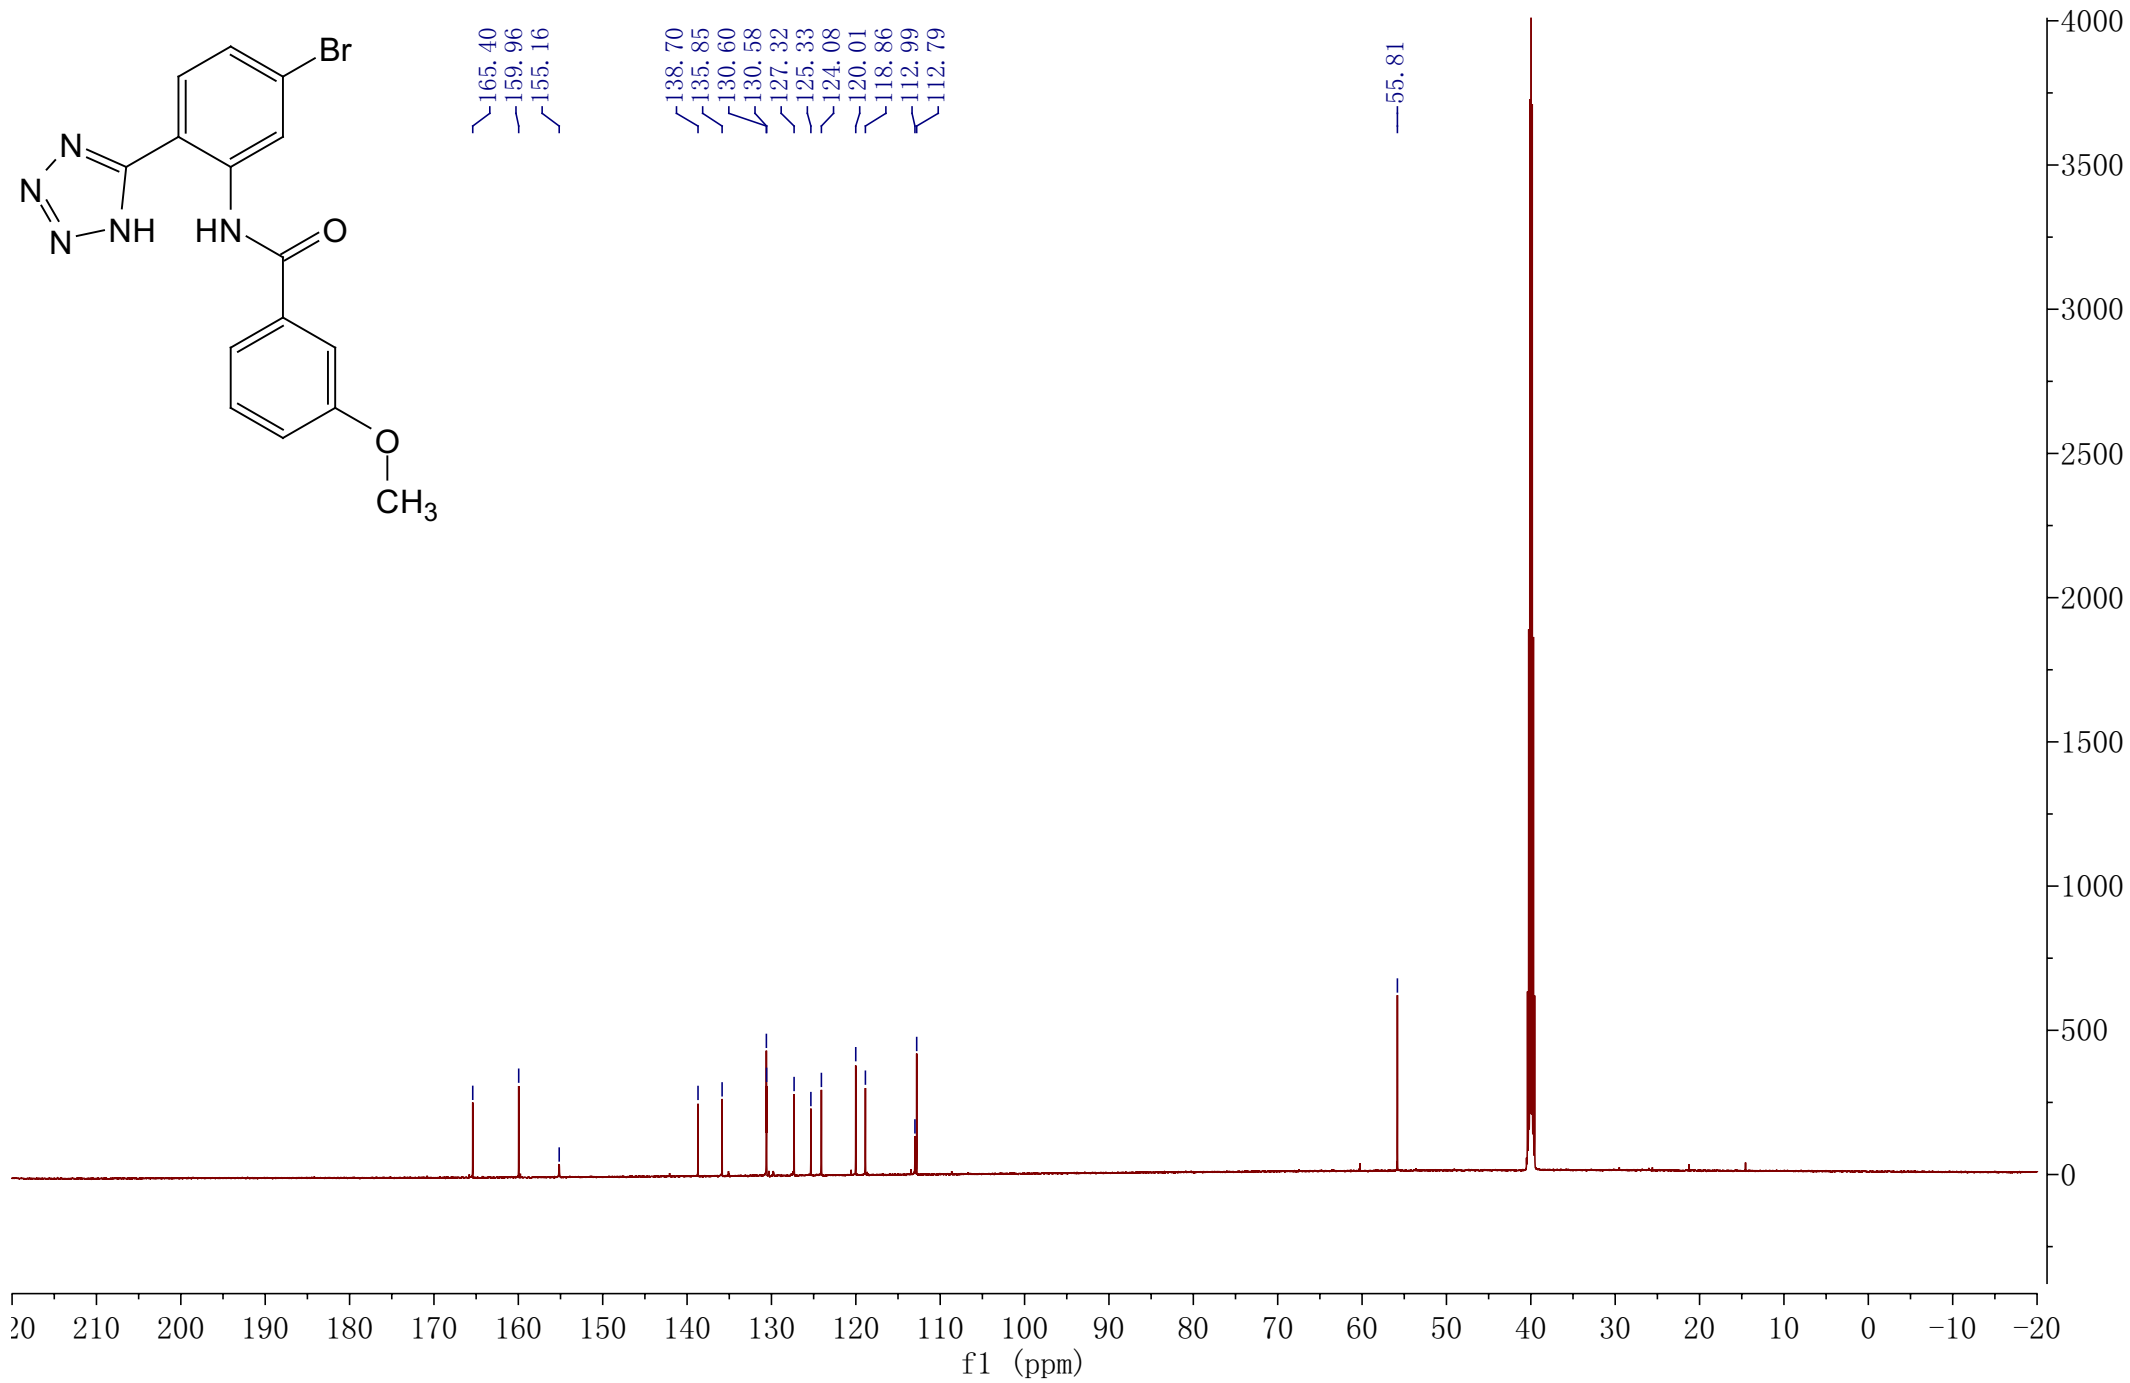



$^1\text{H}$  NMR (600 MHz, DMSO)  $\delta$  11.65 (s, 1H), 8.91 (d,  $J = 2.0$  Hz, 1H), 8.02 (d,  $J = 8.7$  Hz, 2H), 7.94 (d,  $J = 8.4$  Hz, 1H), 7.55 (dd,  $J = 8.4, 1.9$  Hz, 1H), 7.14 (d,  $J = 8.7$  Hz, 2H), 3.88 (s, 3H).

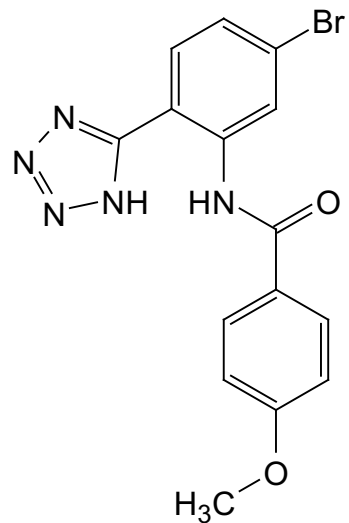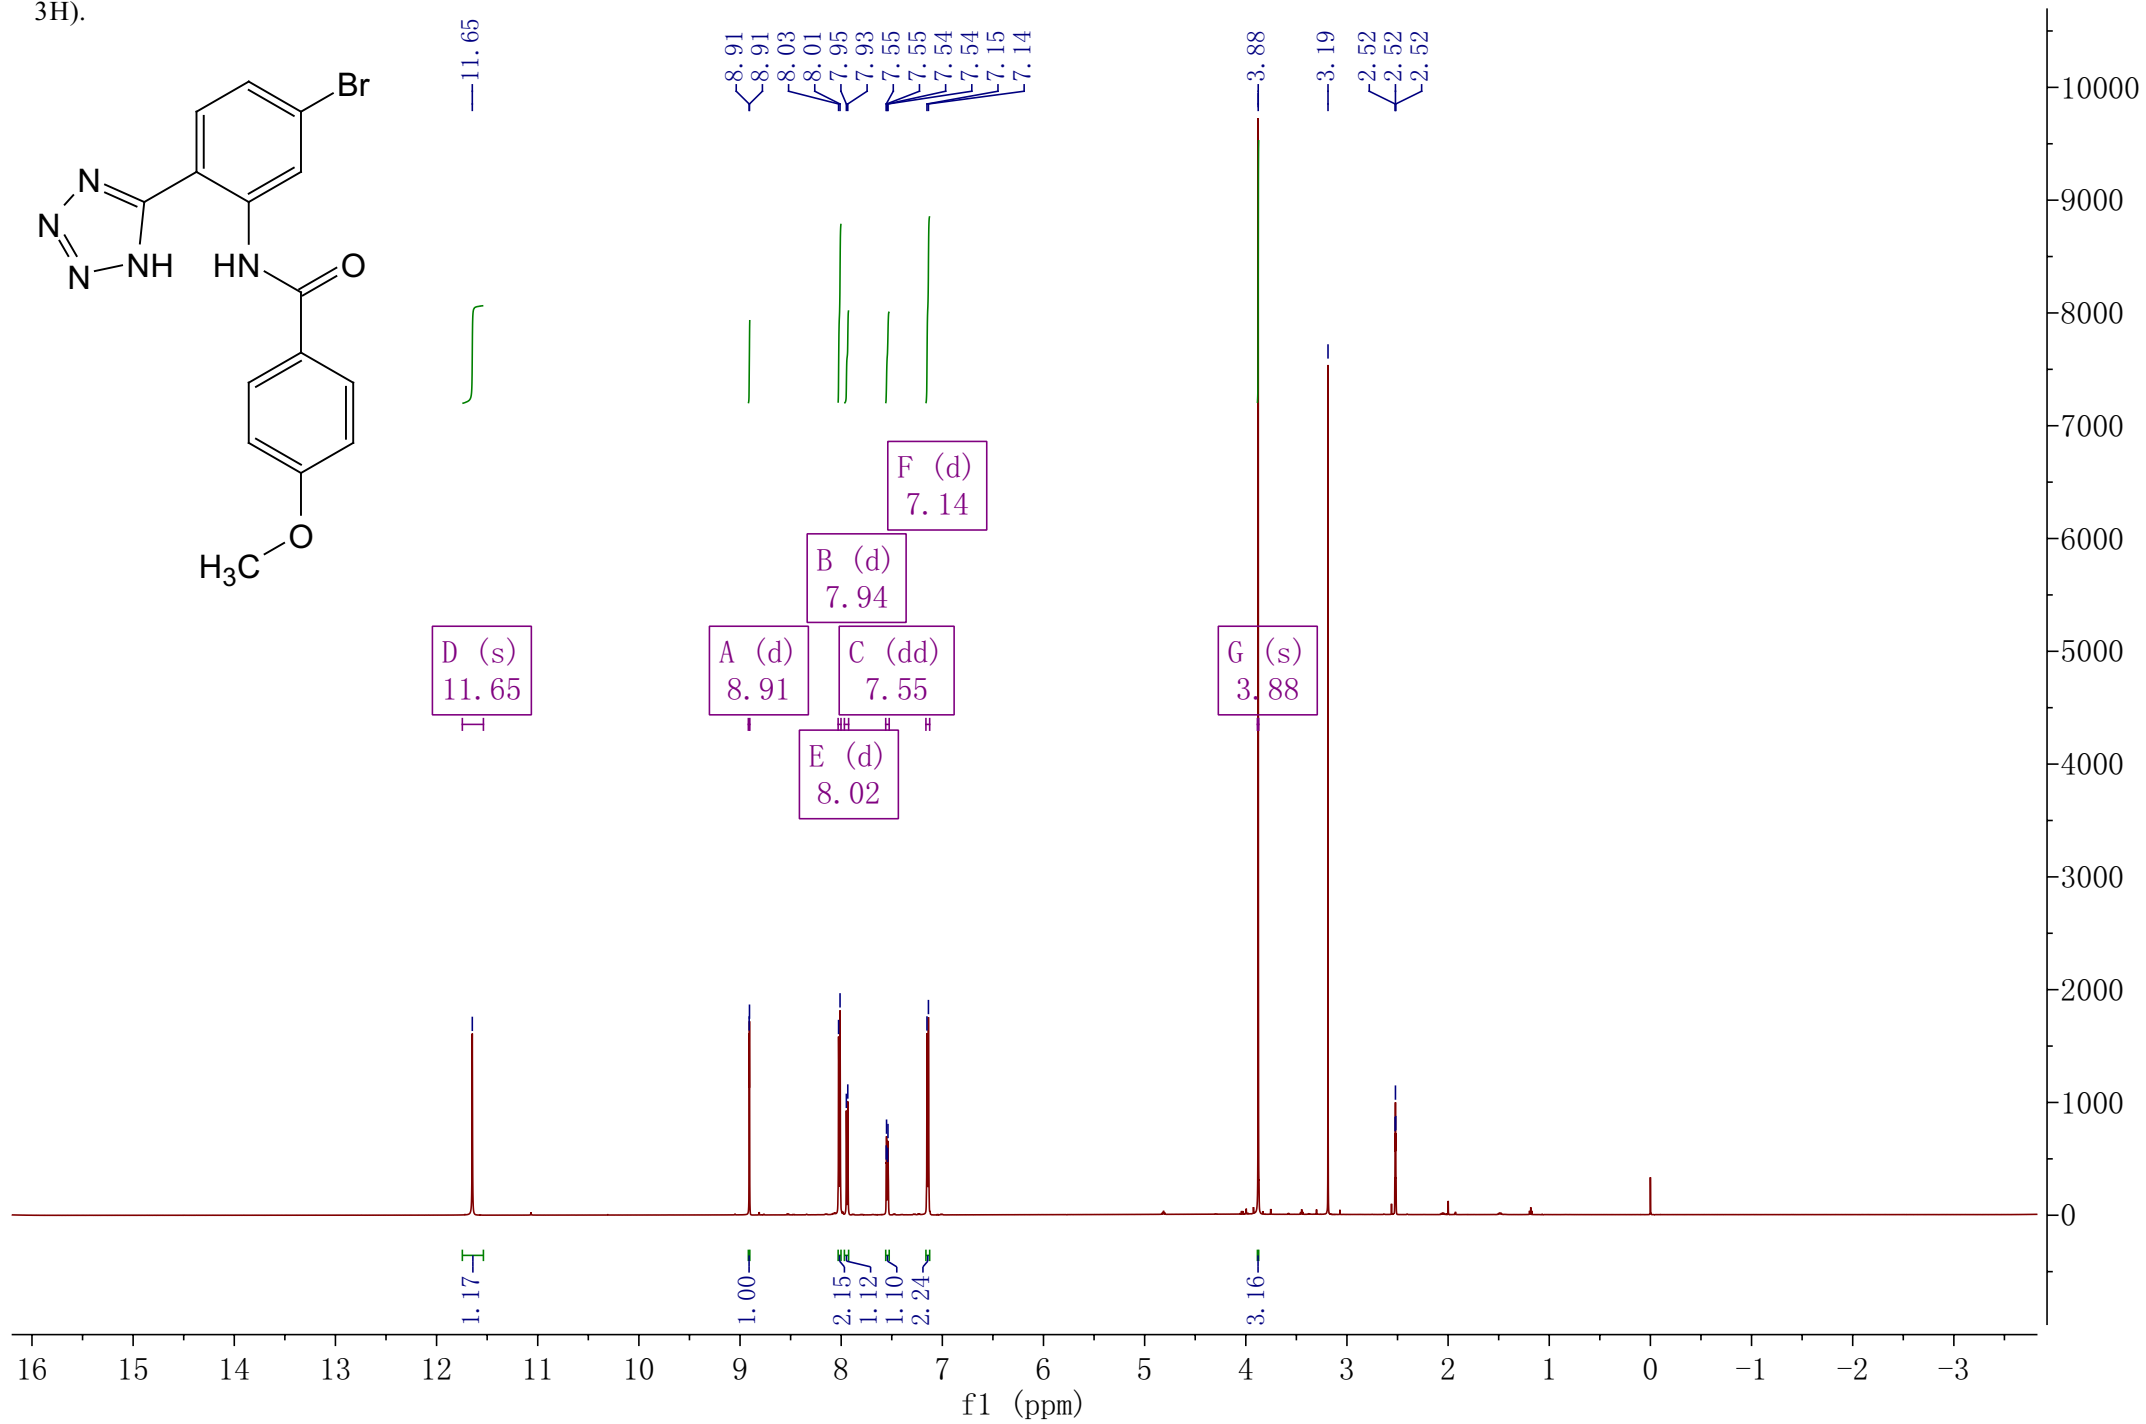

$^{13}\text{C}$  NMR (151 MHz, DMSO)  $\delta$  165.09, 162.99, 154.96, 139.04, 130.48, 129.76, 126.92, 126.42, 125.52, 123.92, 114.66, 112.23, 56.01, 49.07, 40.38, 40.24, 40.10, 39.96, 39.82, 39.69, 39.55

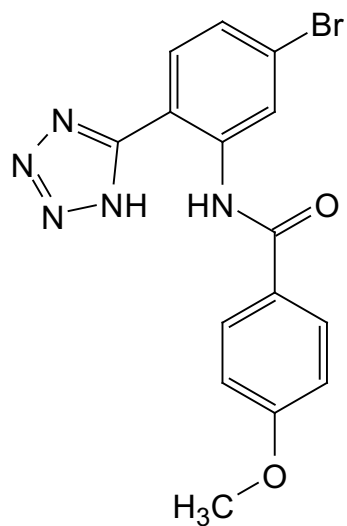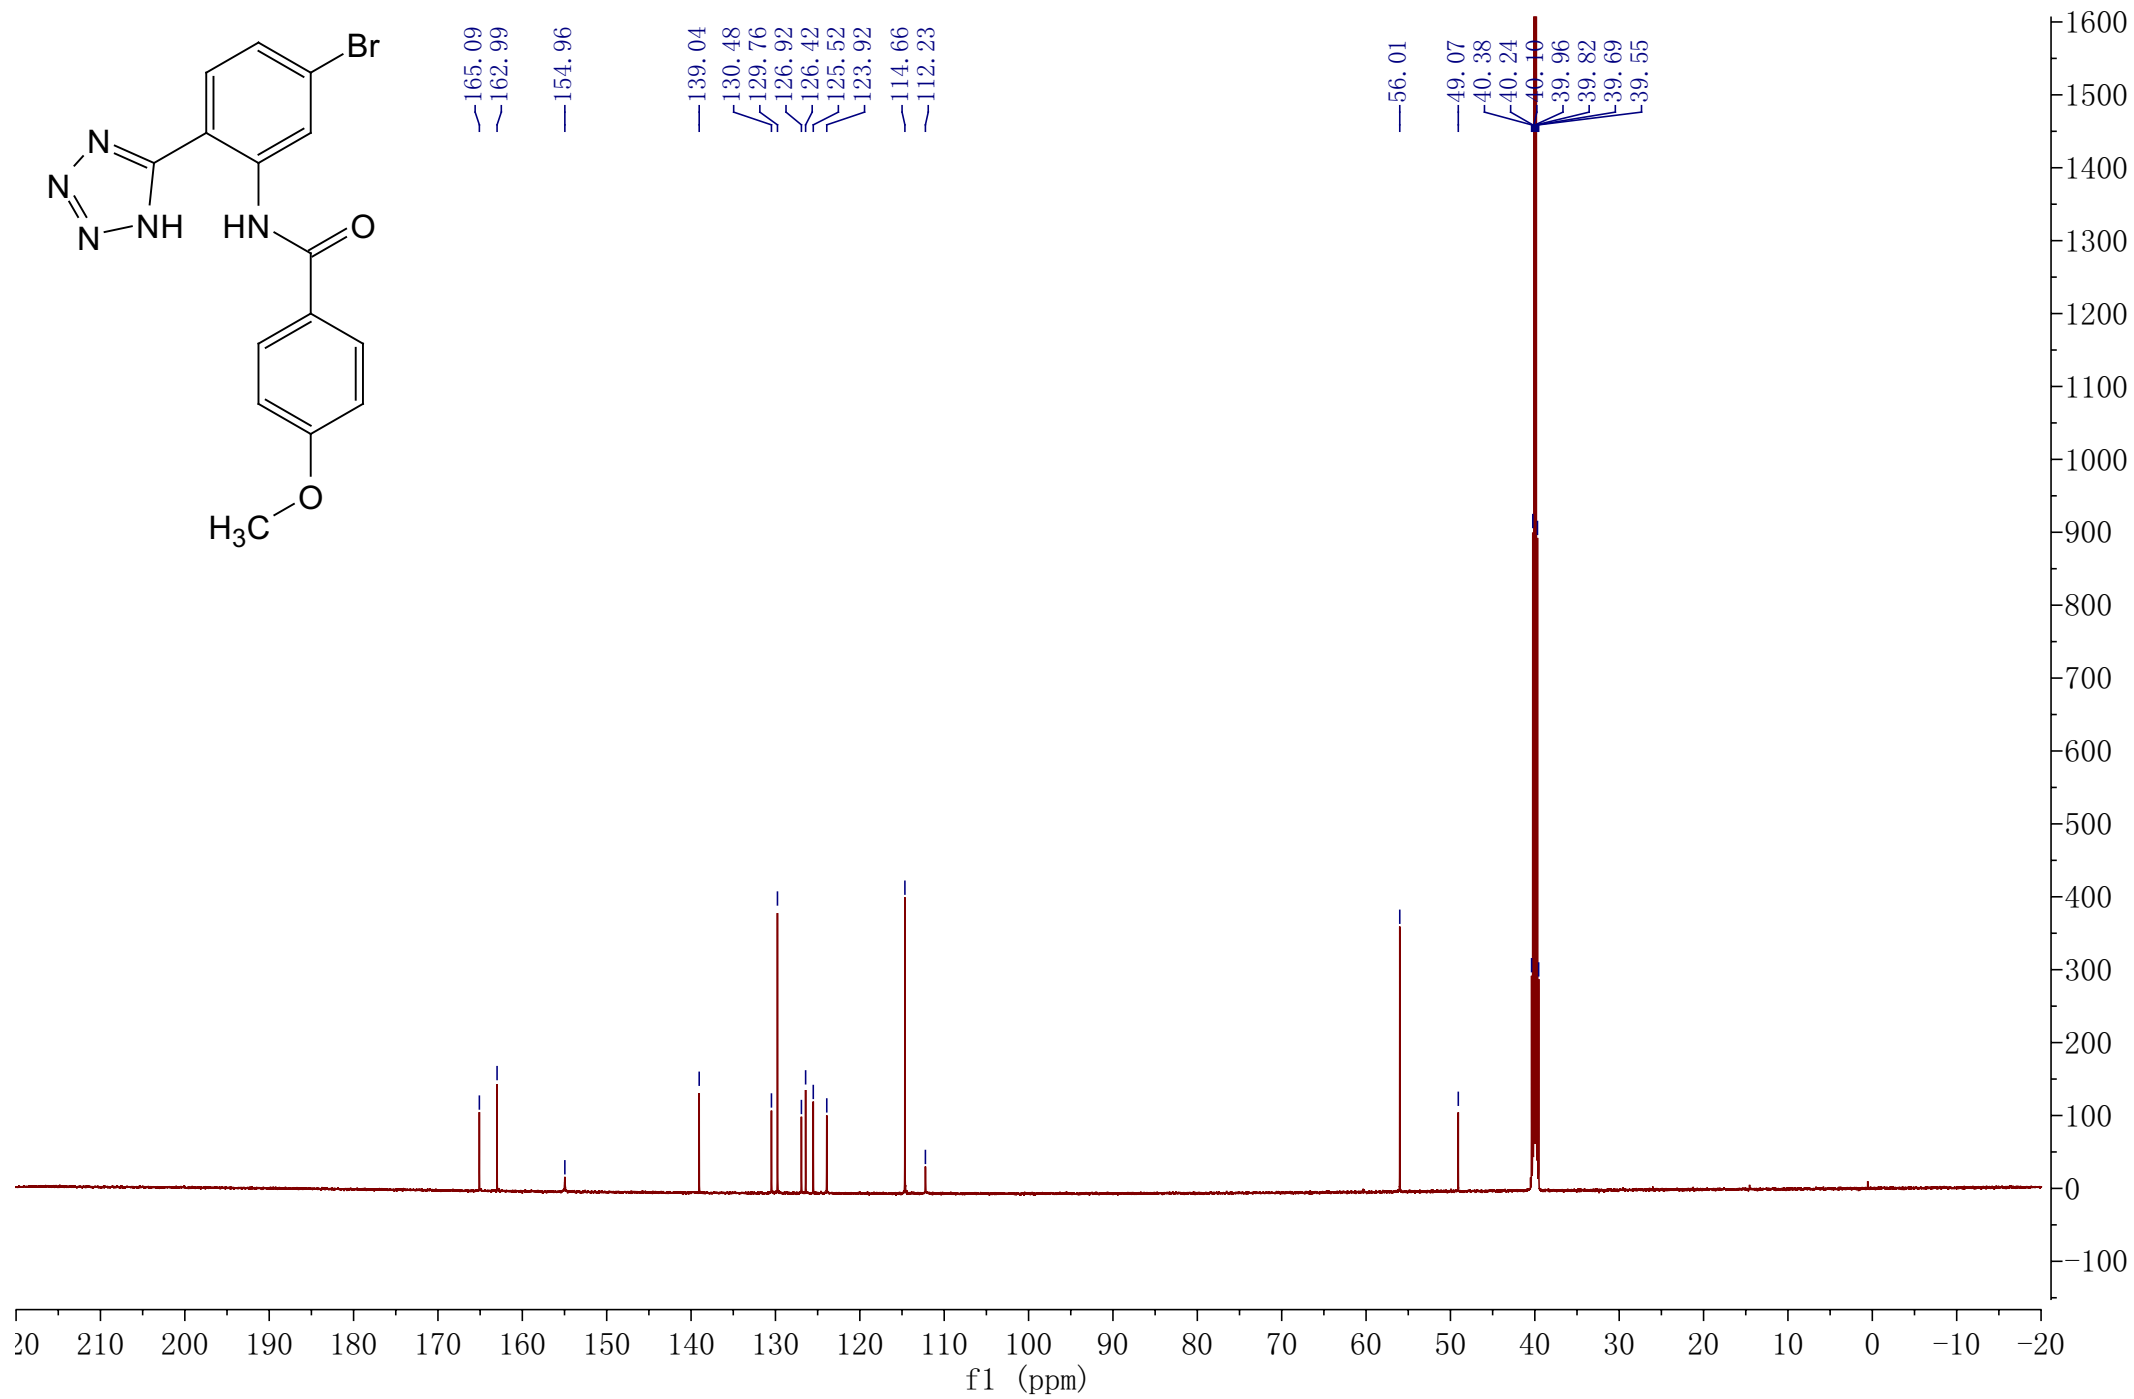

$^1\text{H}$  NMR (600 MHz, DMSO)  $\delta$  12.58 (s, 1H), 9.00 (d,  $J = 2.0$  Hz, 1H), 8.11 (t,  $J = 10.5$  Hz, 1H), 7.79 (d,  $J = 2.0$  Hz, 1H), 7.75 (dd,  $J = 8.4, 2.1$  Hz, 1H), 7.46 (dd,  $J = 8.4, 2.1$  Hz, 1H), 7.18 (d,  $J = 8.5$  Hz, 1H), 3.94 (s, 3H), 3.88 (s, 3H).

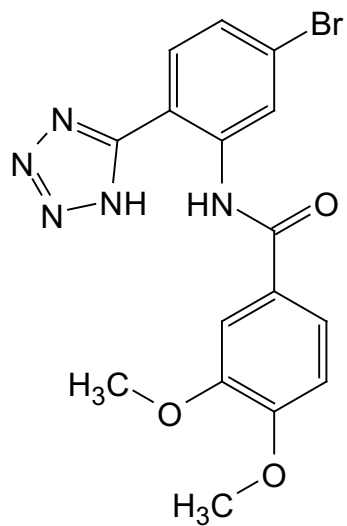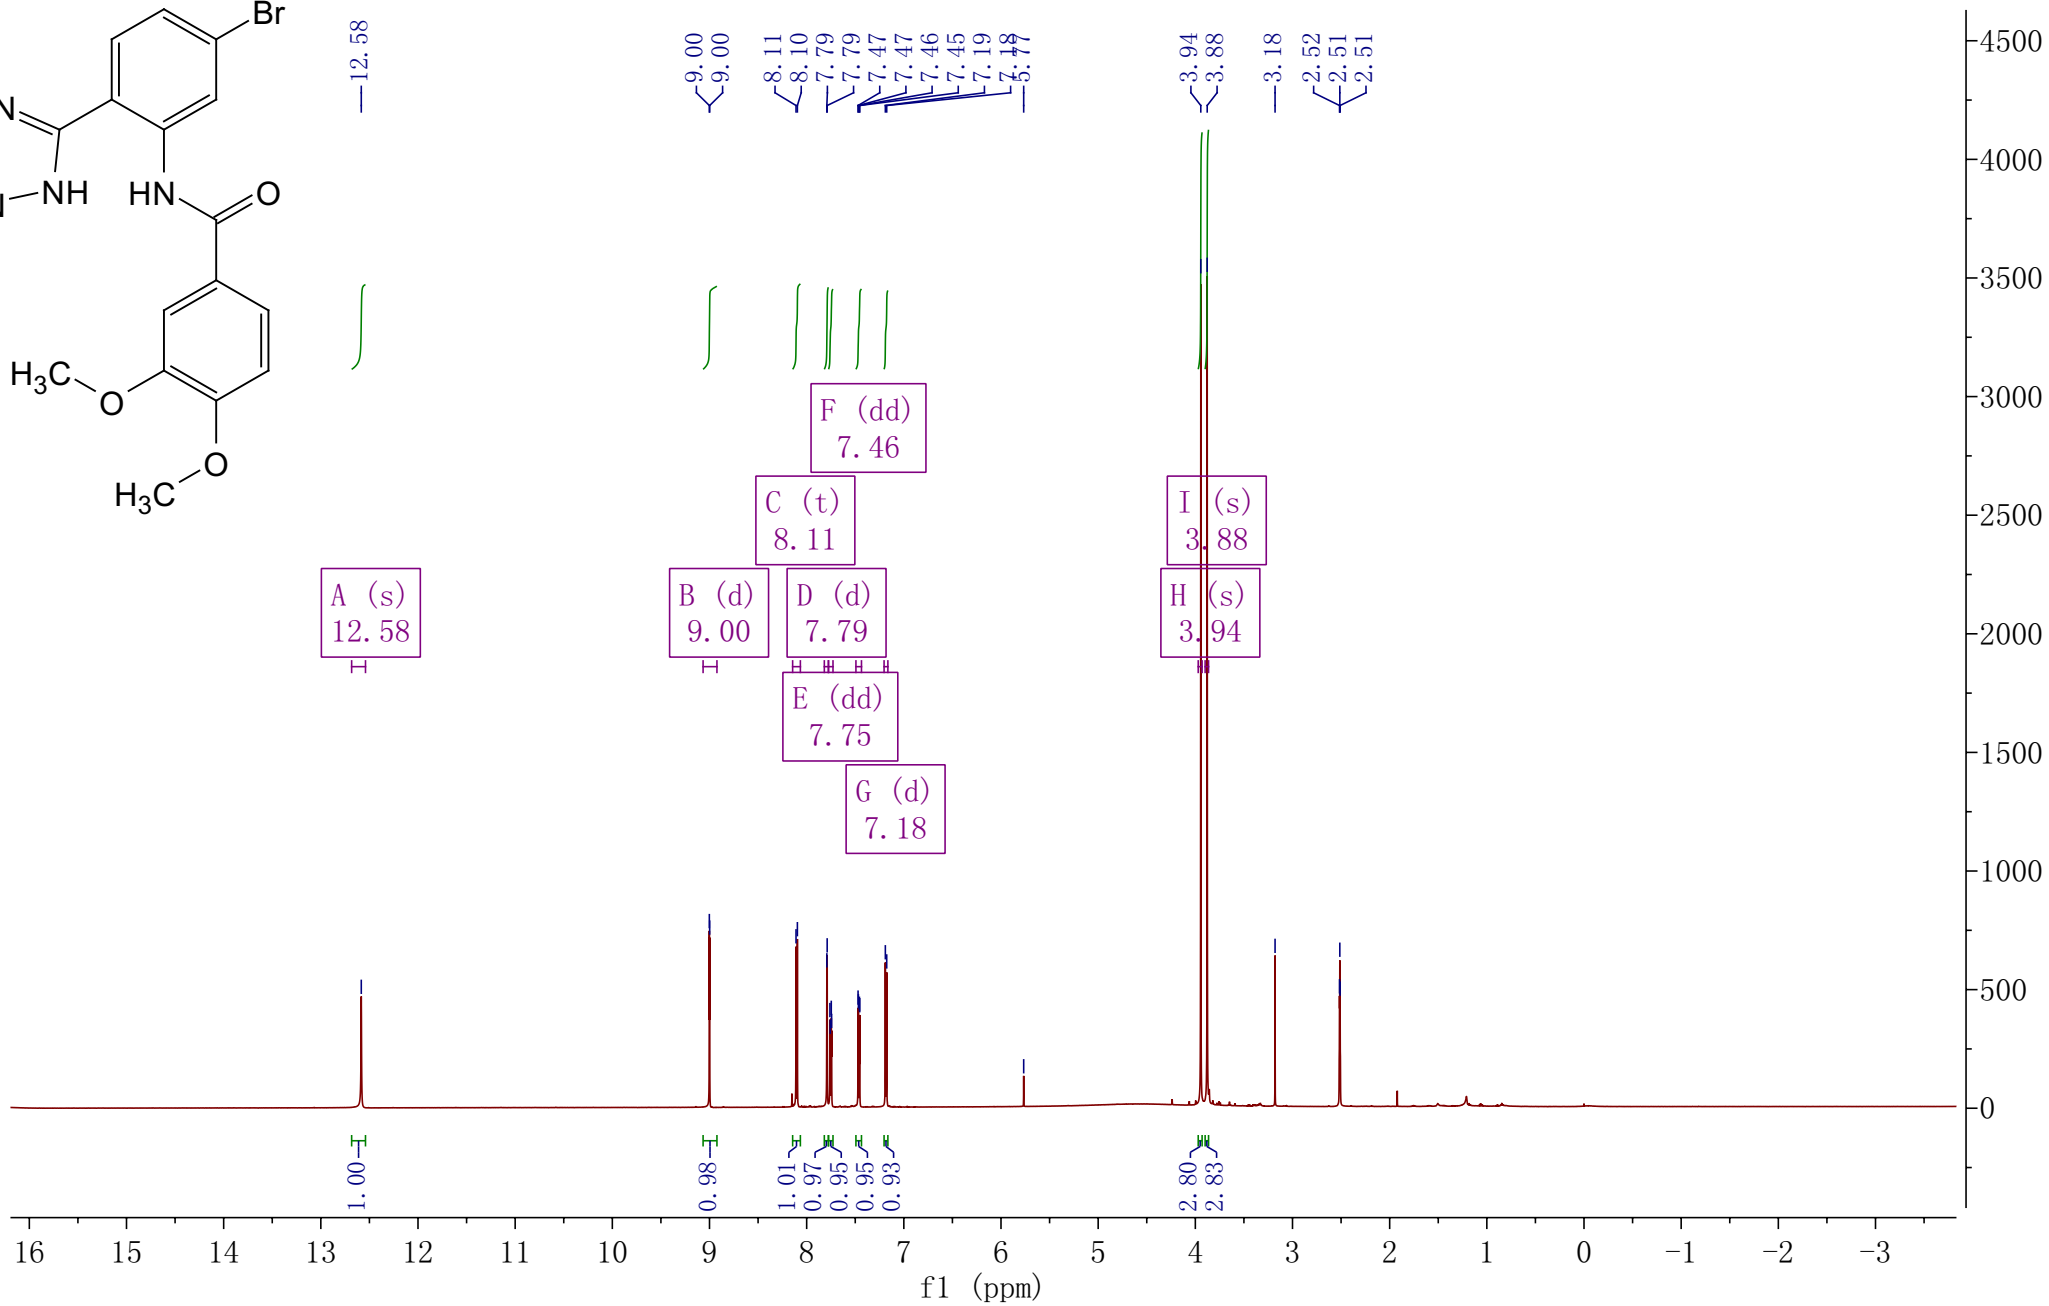

<sup>13</sup>C NMR (151 MHz, DMSO) δ 165.17, 157.19, 152.54, 149.06, 138.66, 130.01, 126.79, 126.46, 123.47, 122.78, 121.41, 115.11, 111.83, 110.82, 56.20, 56.00.

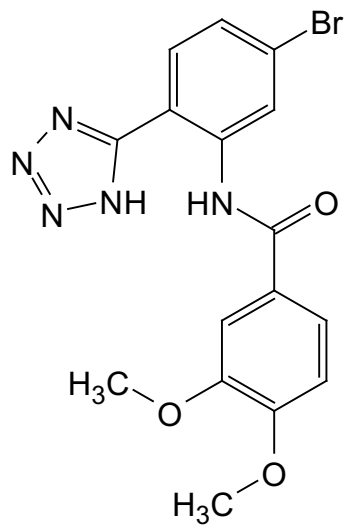

— 165.17  
~ 157.19  
~ 152.54  
~ 149.06  
— 138.66  
/ 130.01  
/ 126.79  
/ 126.46  
/ 123.47  
/ 122.78  
/ 121.41  
~ 115.11  
~ 111.83  
~ 110.82

~ 56.20  
~ 56.00  
/ 40.38  
/ 40.24  
/ 40.10  
/ 39.96  
/ 39.82  
/ 39.68  
/ 39.54

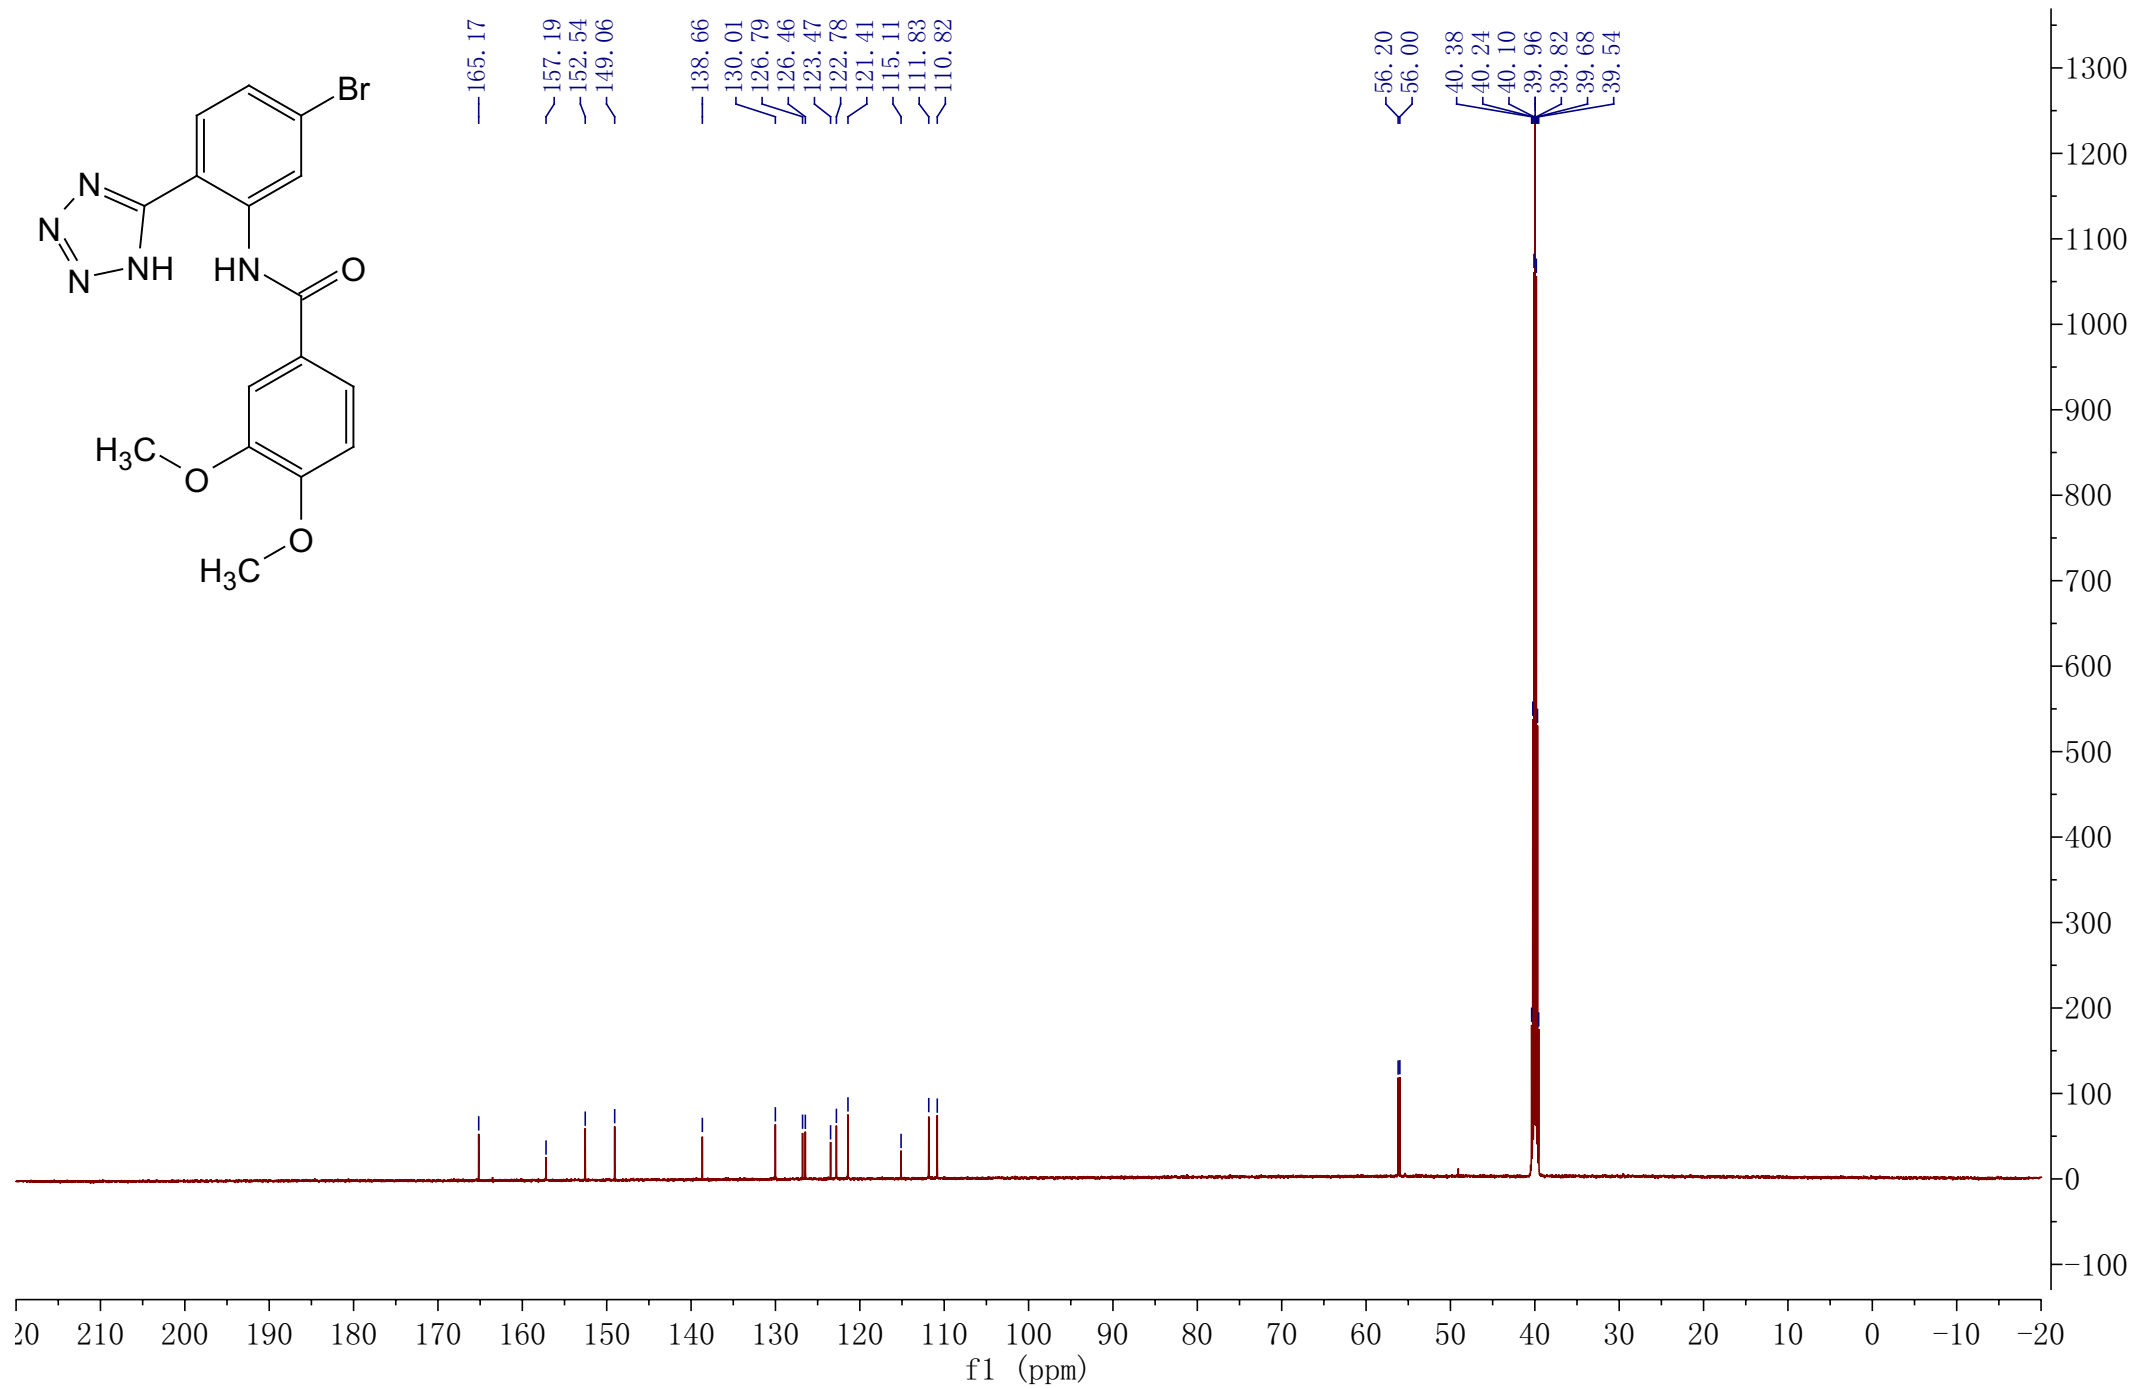

$^1\text{H}$  NMR (600 MHz, DMSO)  $\delta$  11.58 (s, 1H), 8.59 (d,  $J = 8.9$  Hz, 1H), 8.22 (s, 1H), 8.03 (d,  $J = 8.3$  Hz, 2H), 7.78 (d,  $J = 8.5$  Hz, 1H), 7.14 (d,  $J = 8.3$  Hz, 2H), 3.87 (s, 3H).

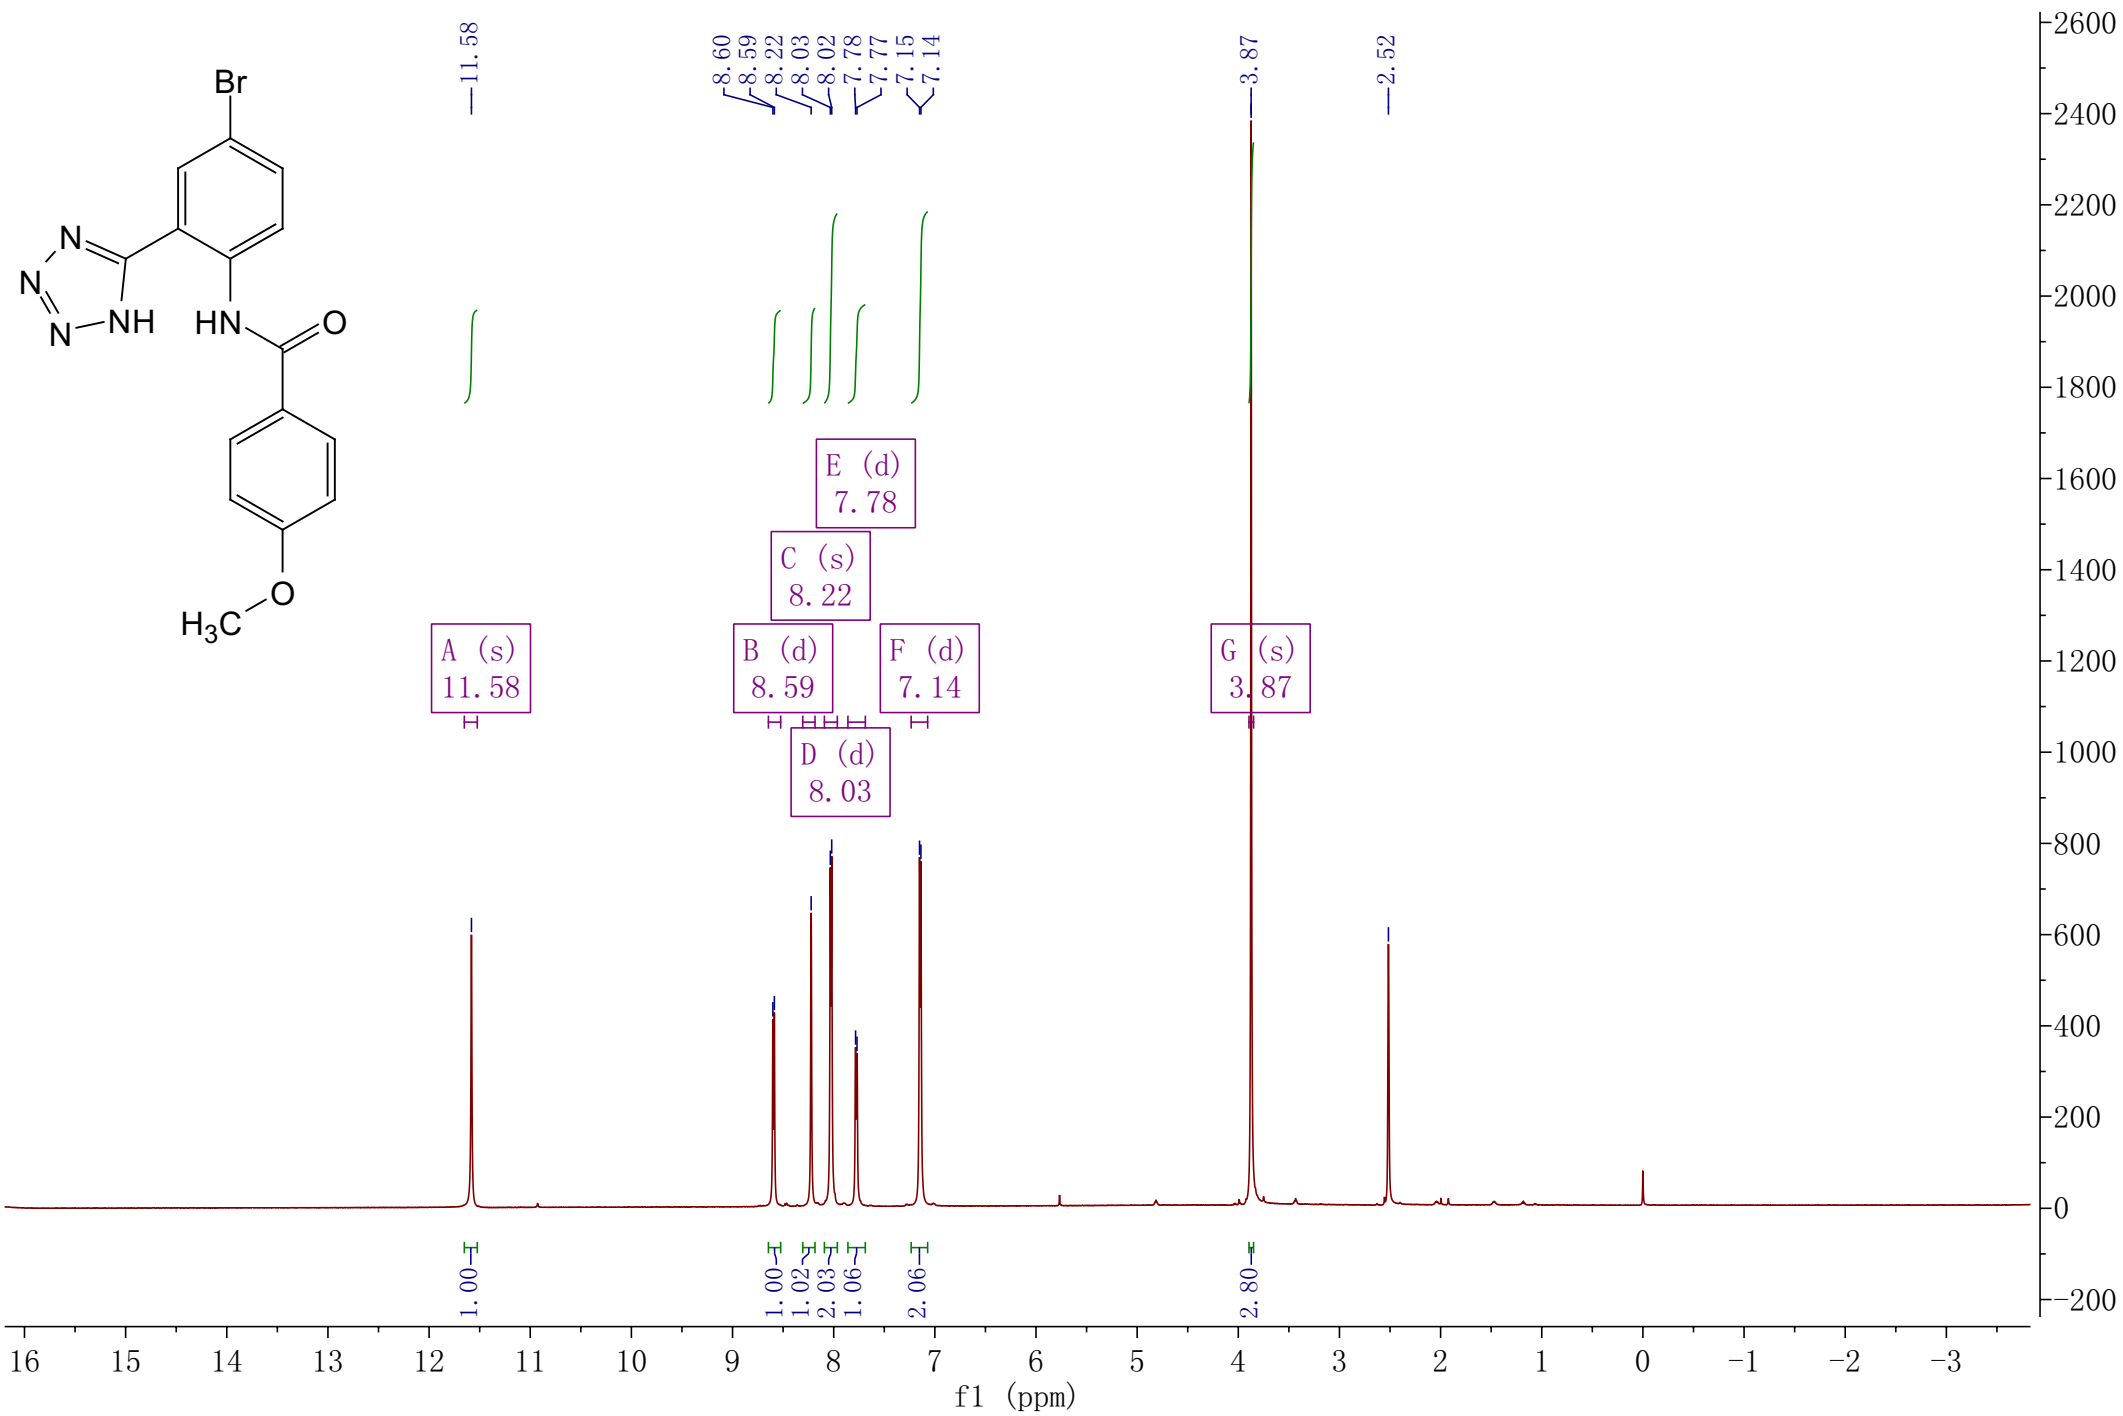

$^{13}\text{C}$  NMR (151 MHz, DMSO)  $\delta$  164.98, 162.90, 154.65, 137.18, 134.62, 131.15, 129.77, 126.67, 123.75, 115.71, 115.68, 114.63, 56.00, 40.39, 40.25, 40.11, 39.97, 39.83, 39.69, 39.56.

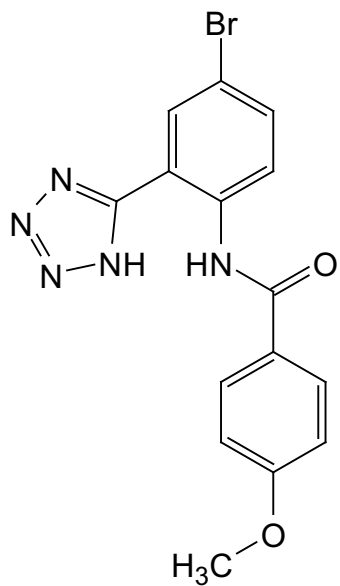

~164.98  
~162.90

—154.65

~137.18

~134.62

~131.15

~129.77

~126.67

~123.75

~115.71

~115.68

~114.63

—56.00

40.39

40.25

40.11

39.97

39.83

39.69

39.56

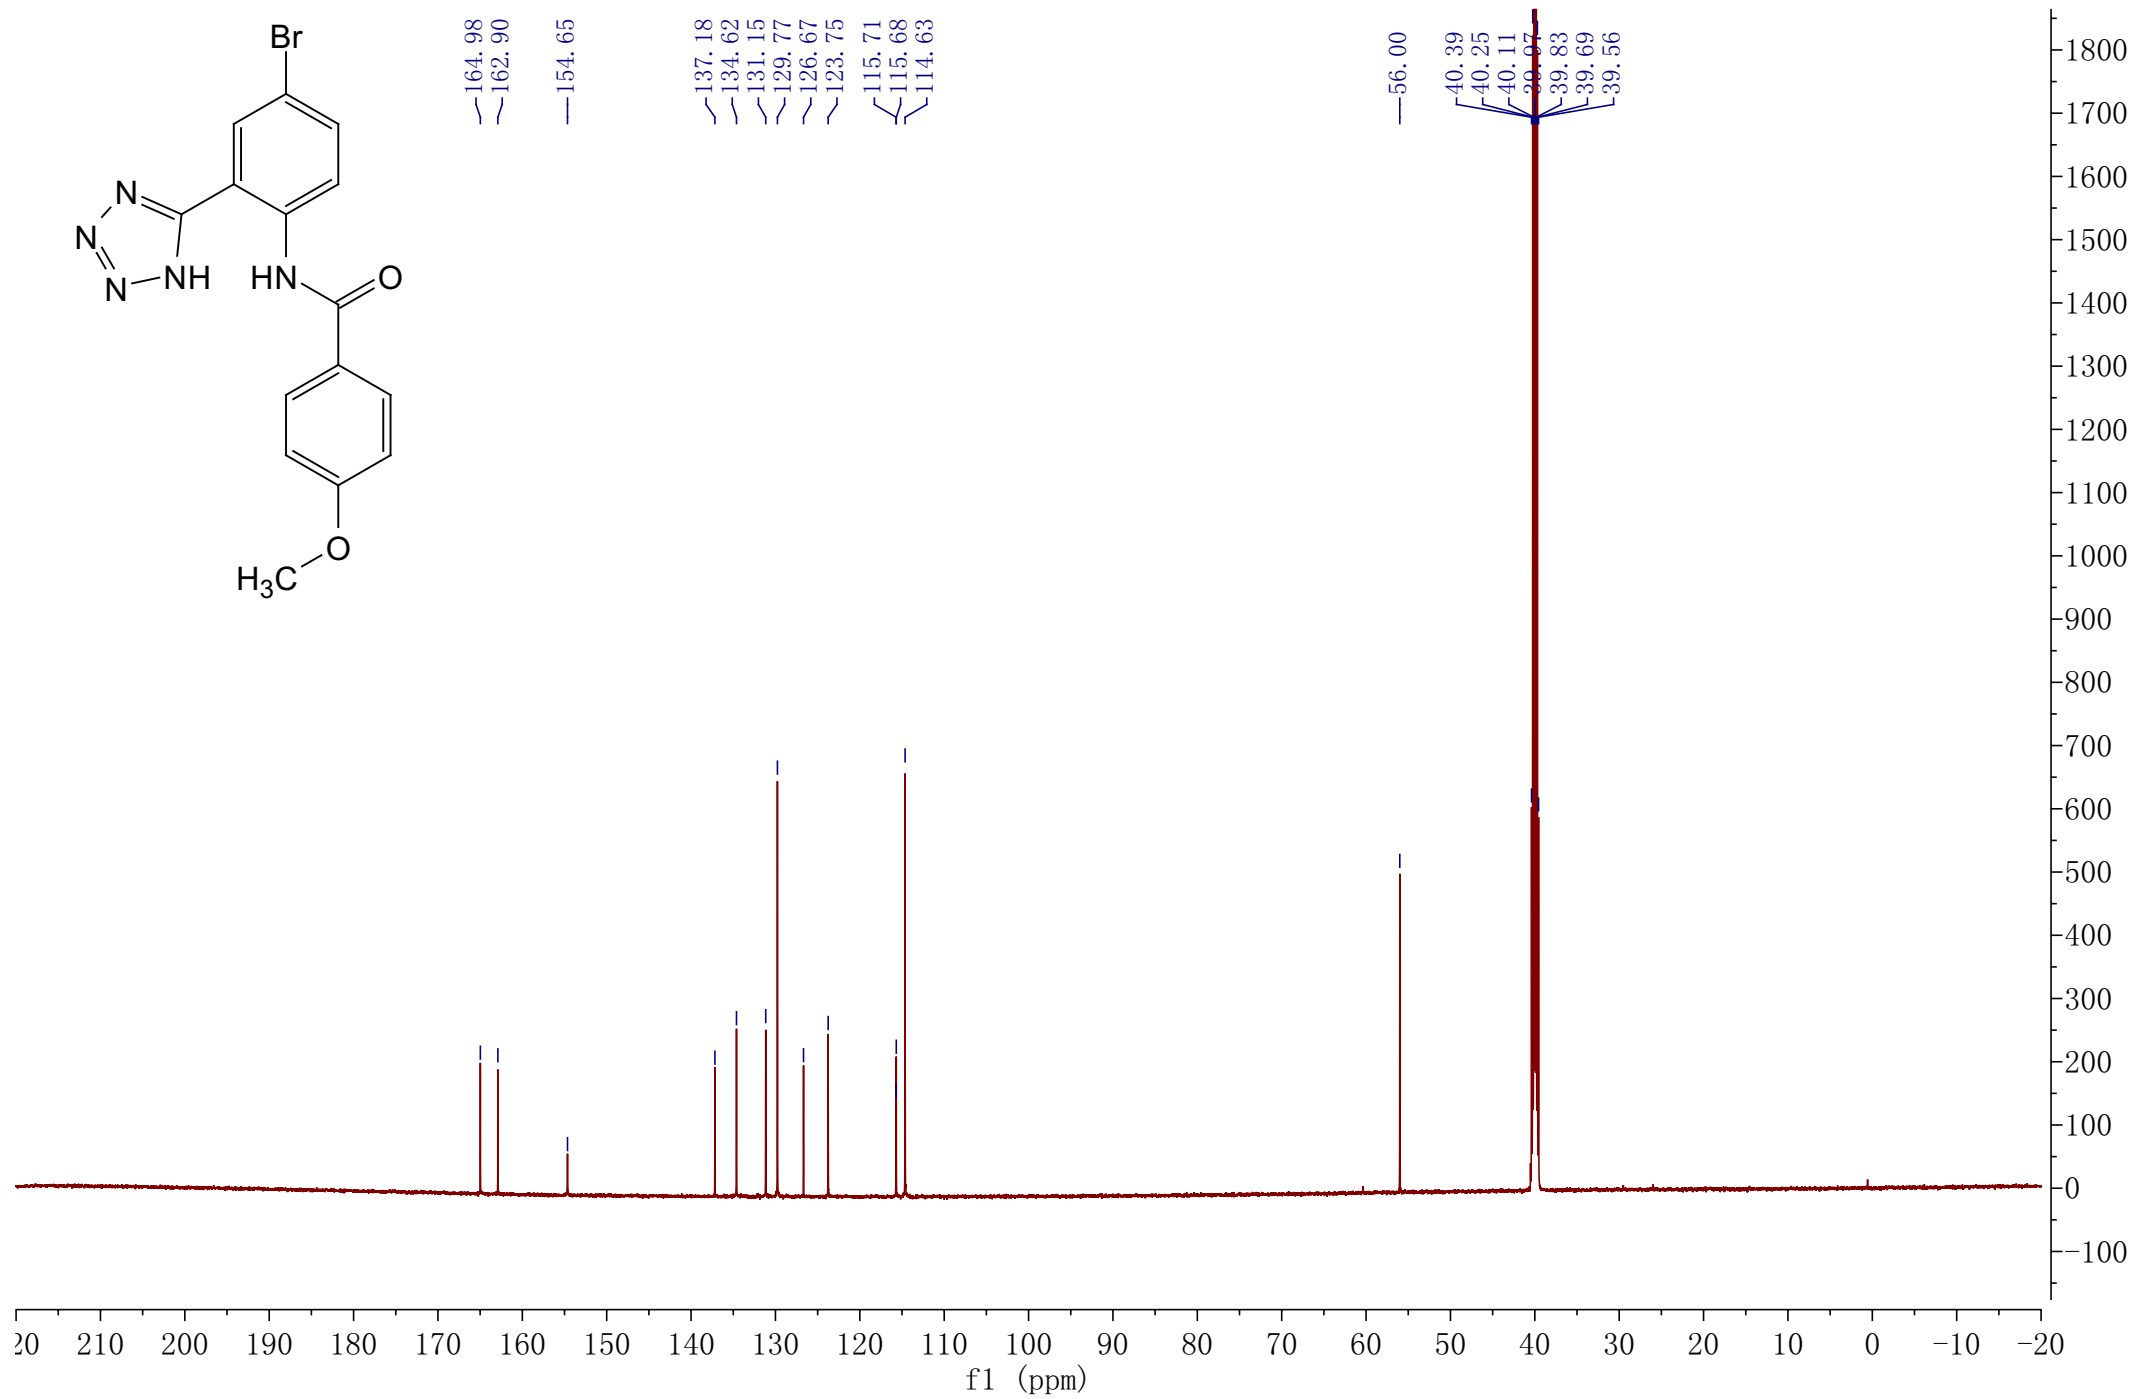

$^1\text{H}$  NMR (600 MHz, DMSO)  $\delta$  11.81 (s, 1H), 8.56 (dd,  $J = 12.0, 2.7$  Hz, 1H), 8.09 (dd,  $J = 8.8, 6.3$  Hz, 1H), 8.07 – 8.03 (m, 2H), 7.28 – 7.21 (m, 1H), 7.19 – 7.15 (m, 2H), 3.88 (s, 3H).

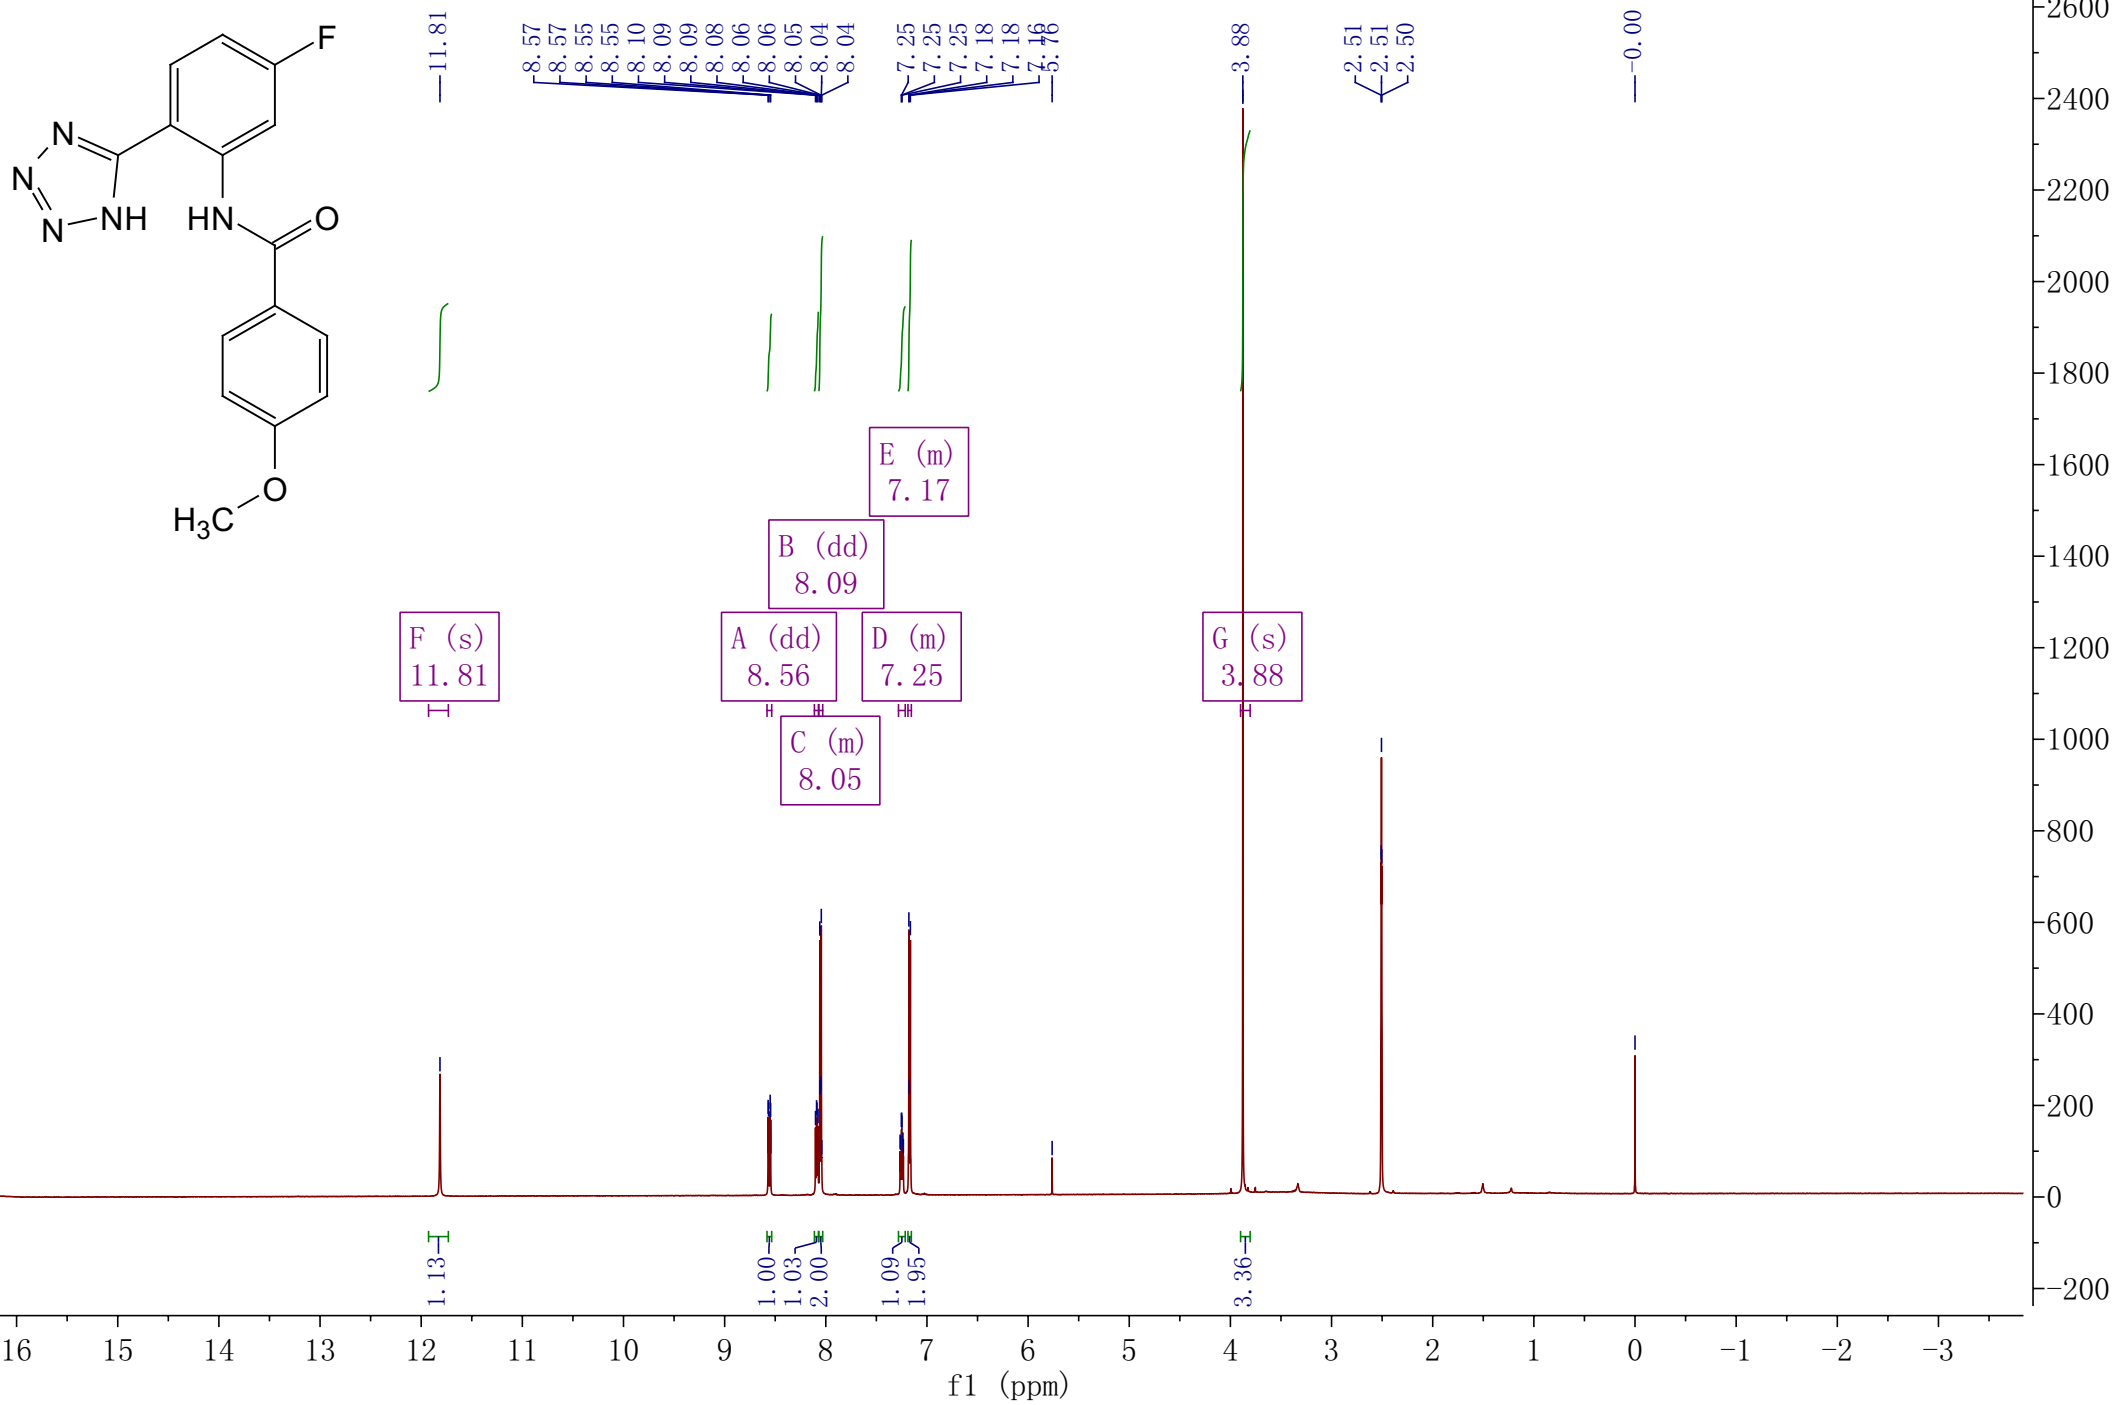

$^{13}\text{C}$  NMR (151 MHz, DMSO)  $\delta$  164.18 (s), 162.94 (d,  $J = 247.2$  Hz), 161.98 (s), 153.74 (s), 138.88 (d,  $J = 12.3$  Hz), 130.06 (d,  $J = 10.6$  Hz), 128.72 (s), 125.43 (s), 113.68 (s), 110.35 (s), 110.20 (s), 108.52 (s), 107.26 (s), 107.07 (s), 54.97 (s).

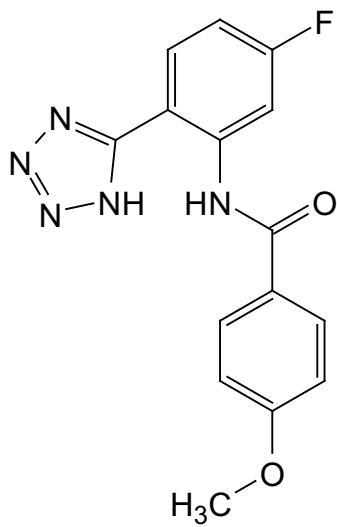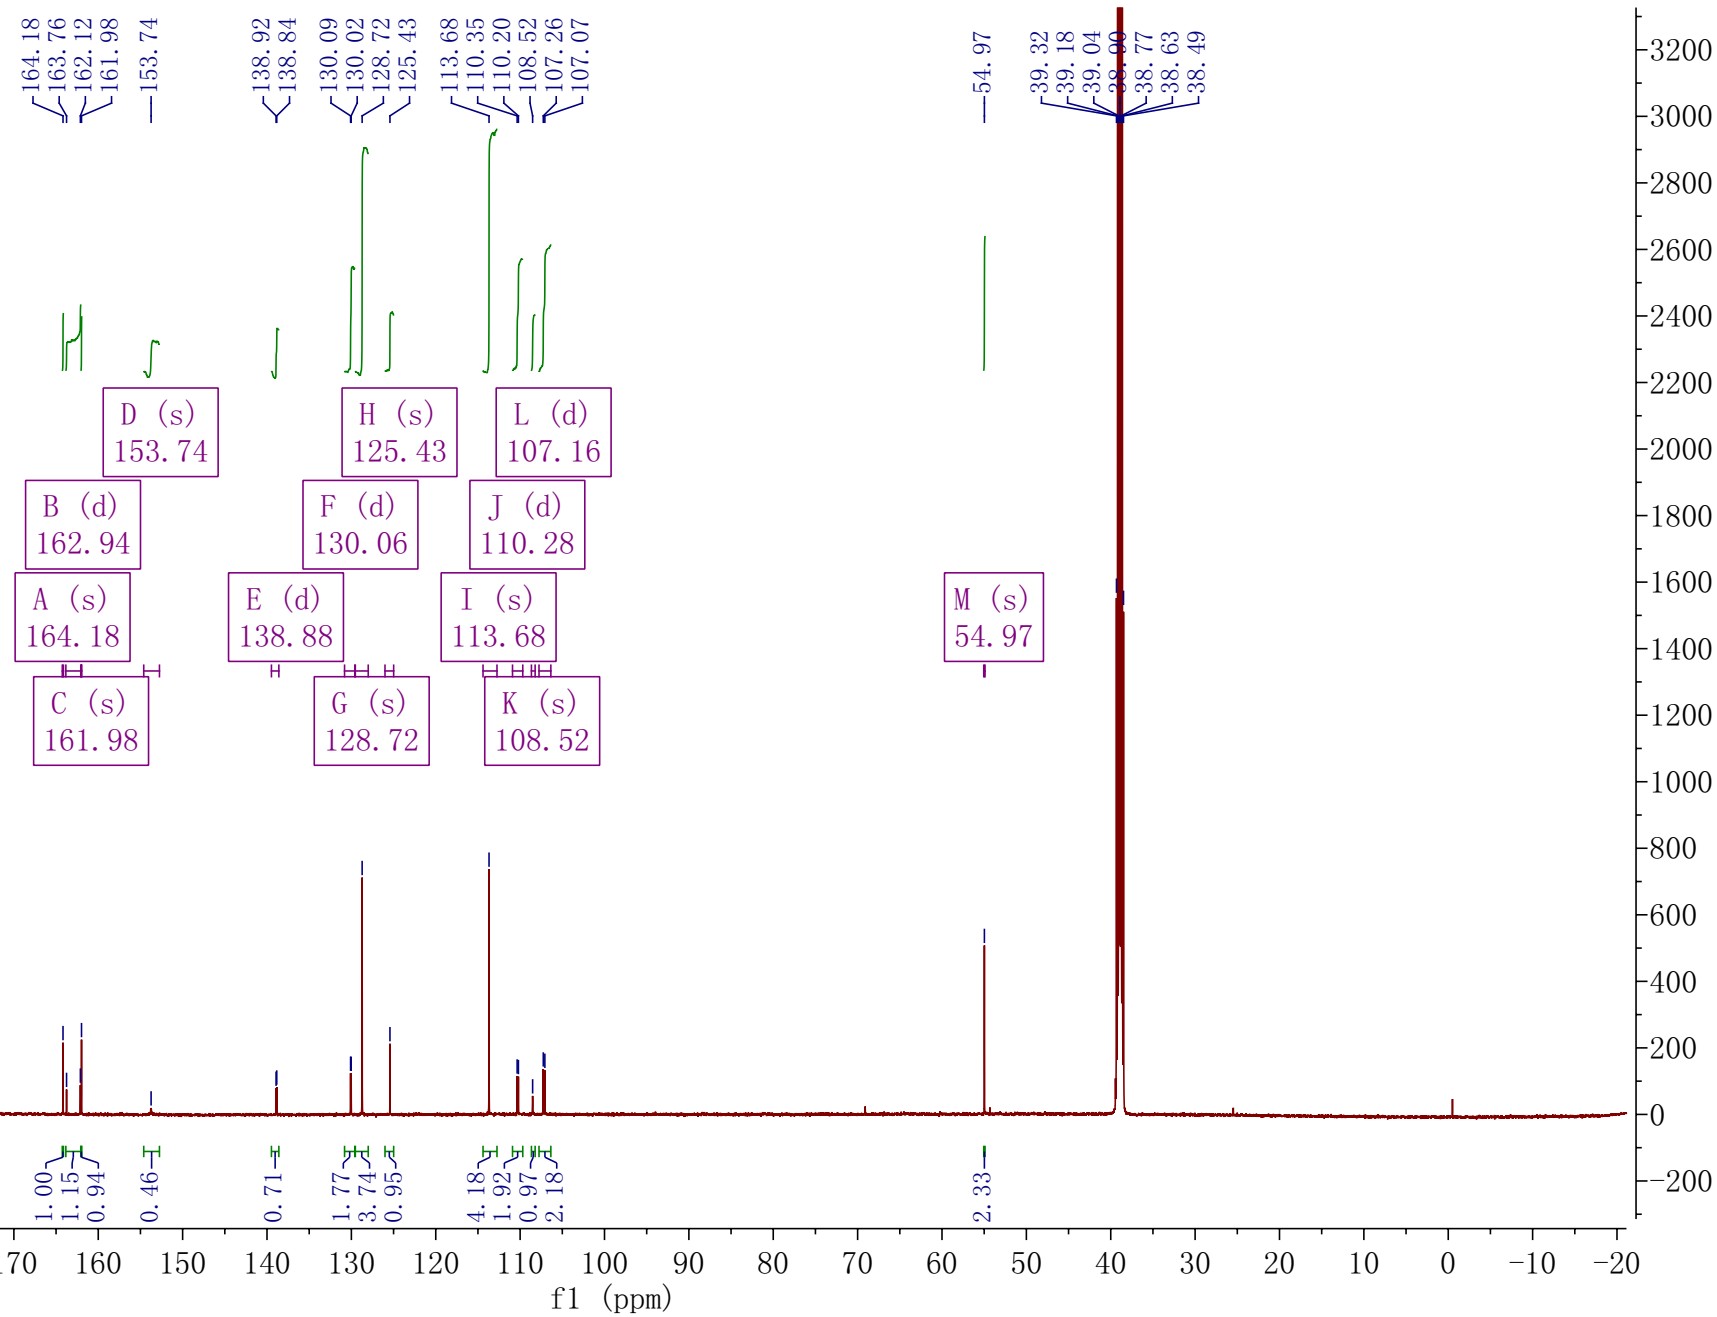



$^1\text{H}$  NMR (600 MHz, DMSO)  $\delta$  11.93 (s, 1H), 8.66 (d,  $J = 8.1$  Hz, 1H), 8.11 – 8.06 (m, 3H), 7.59 – 7.53 (m, 1H), 7.34 – 7.29 (m, 1H), 7.16 (d,  $J = 8.8$  Hz, 2H), 3.87 (s, 3H).

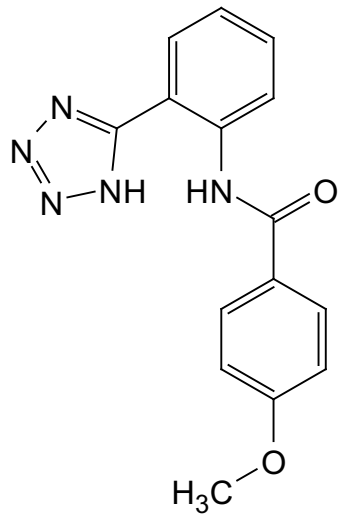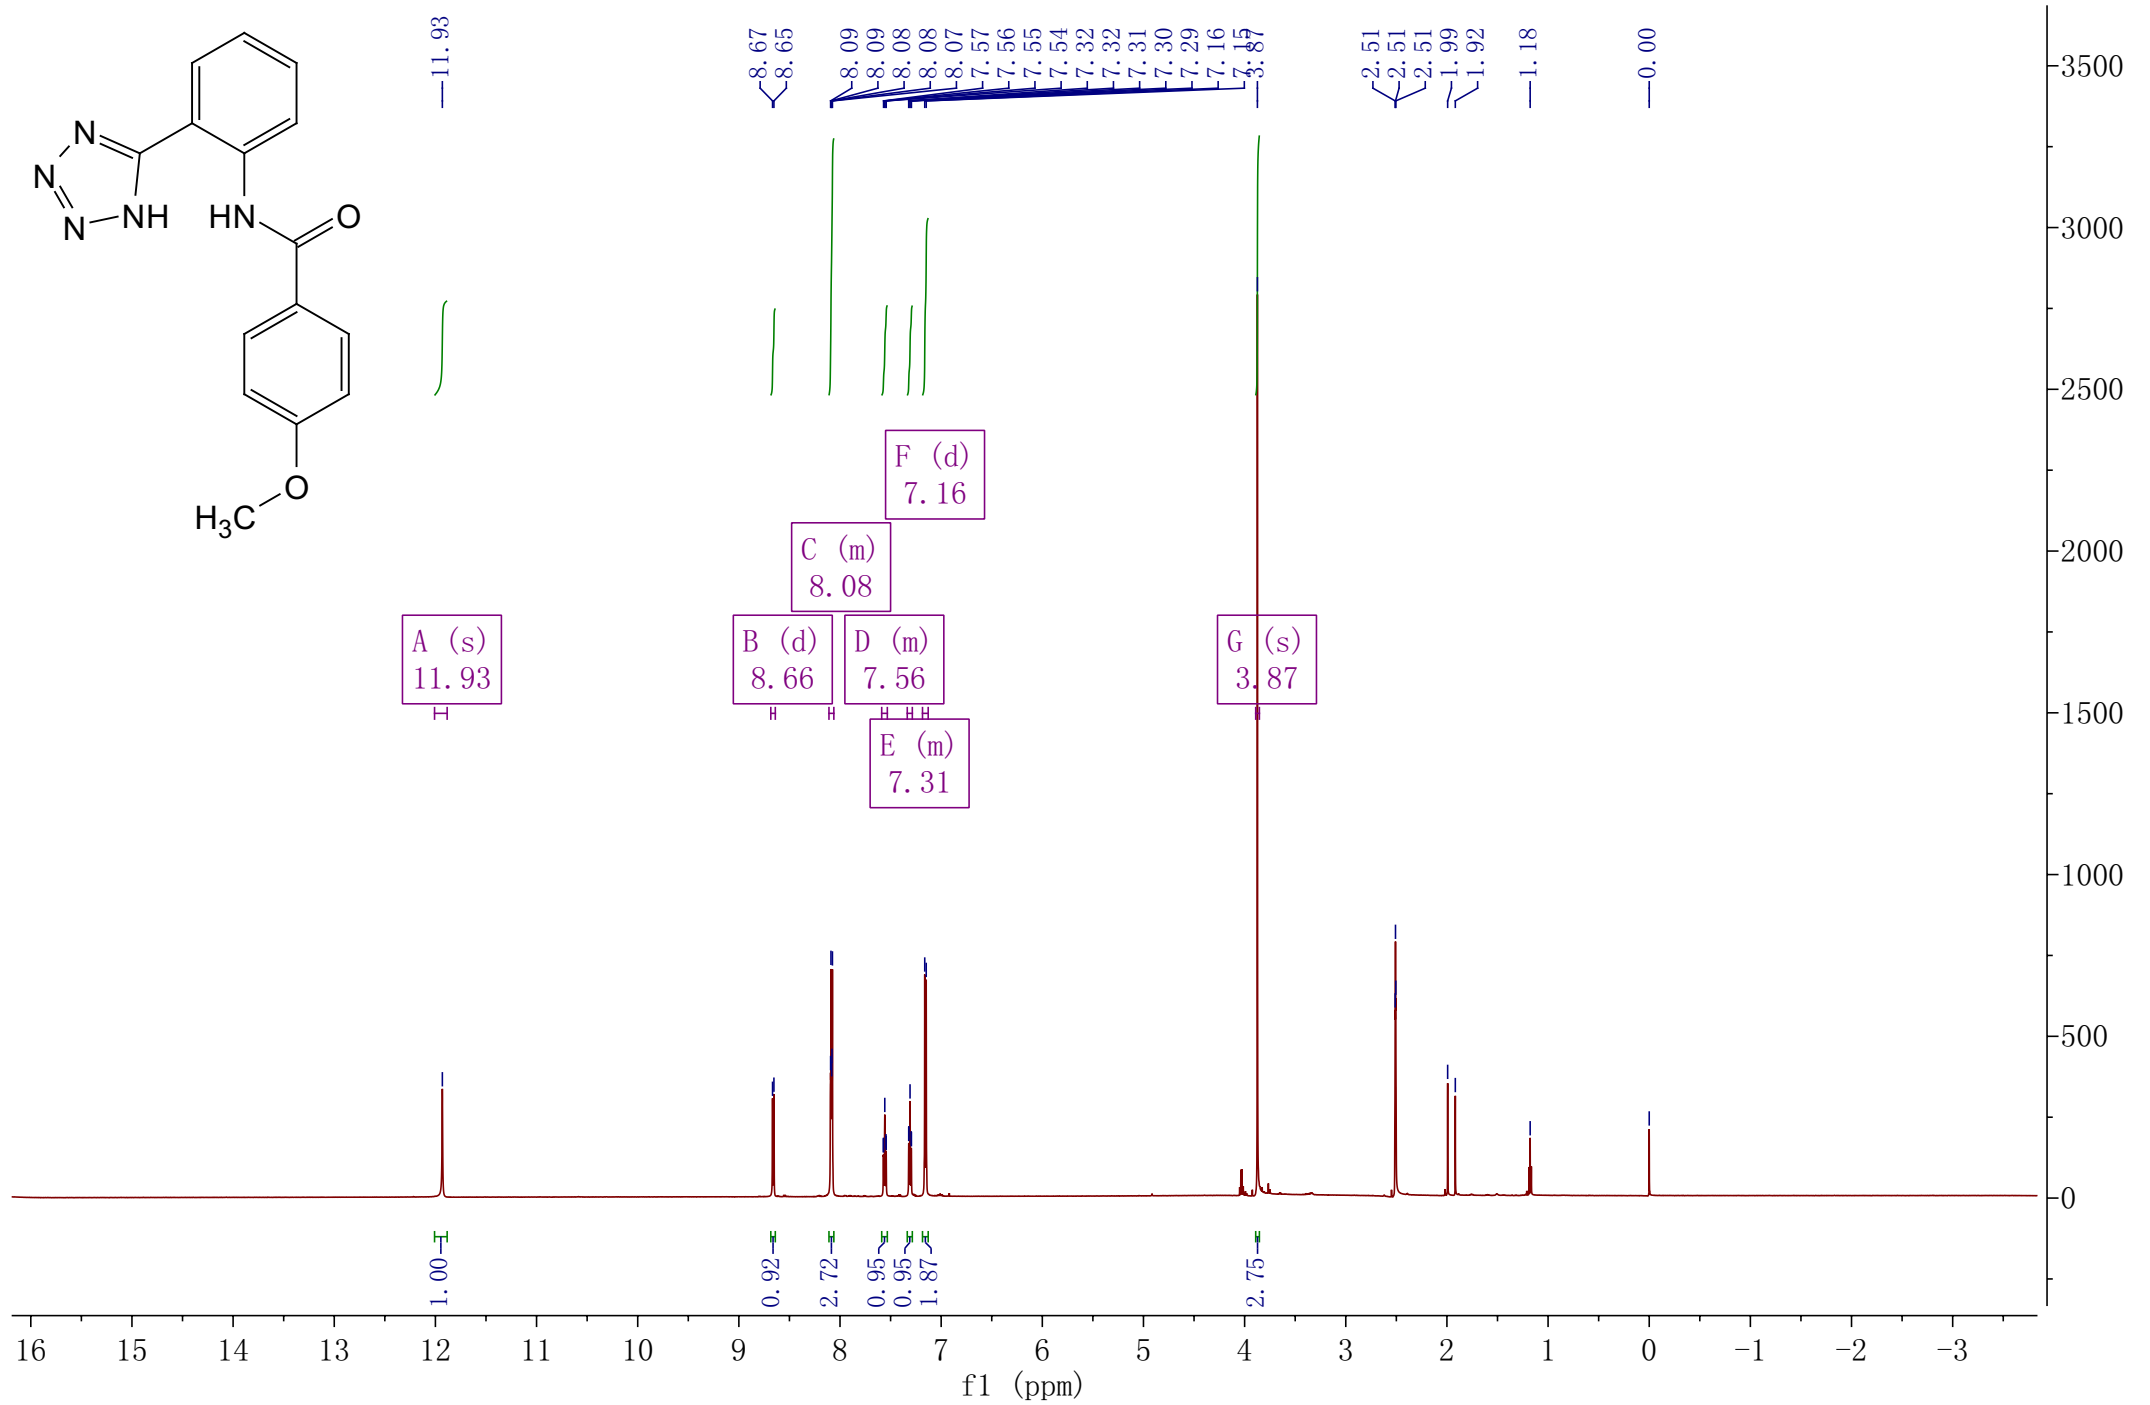

$^{13}\text{C}$  NMR (151 MHz, DMSO)  $\delta$  164.99, 162.73, 156.39, 137.72, 131.39, 129.76, 128.78, 127.16, 124.10, 121.57, 114.95, 114.60, 55.99.

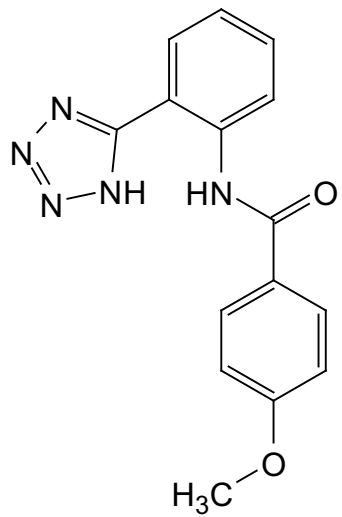

164.99  
162.73  
156.39  
137.72  
131.39  
129.76  
128.78  
124.10  
121.57  
114.95  
114.60

55.99

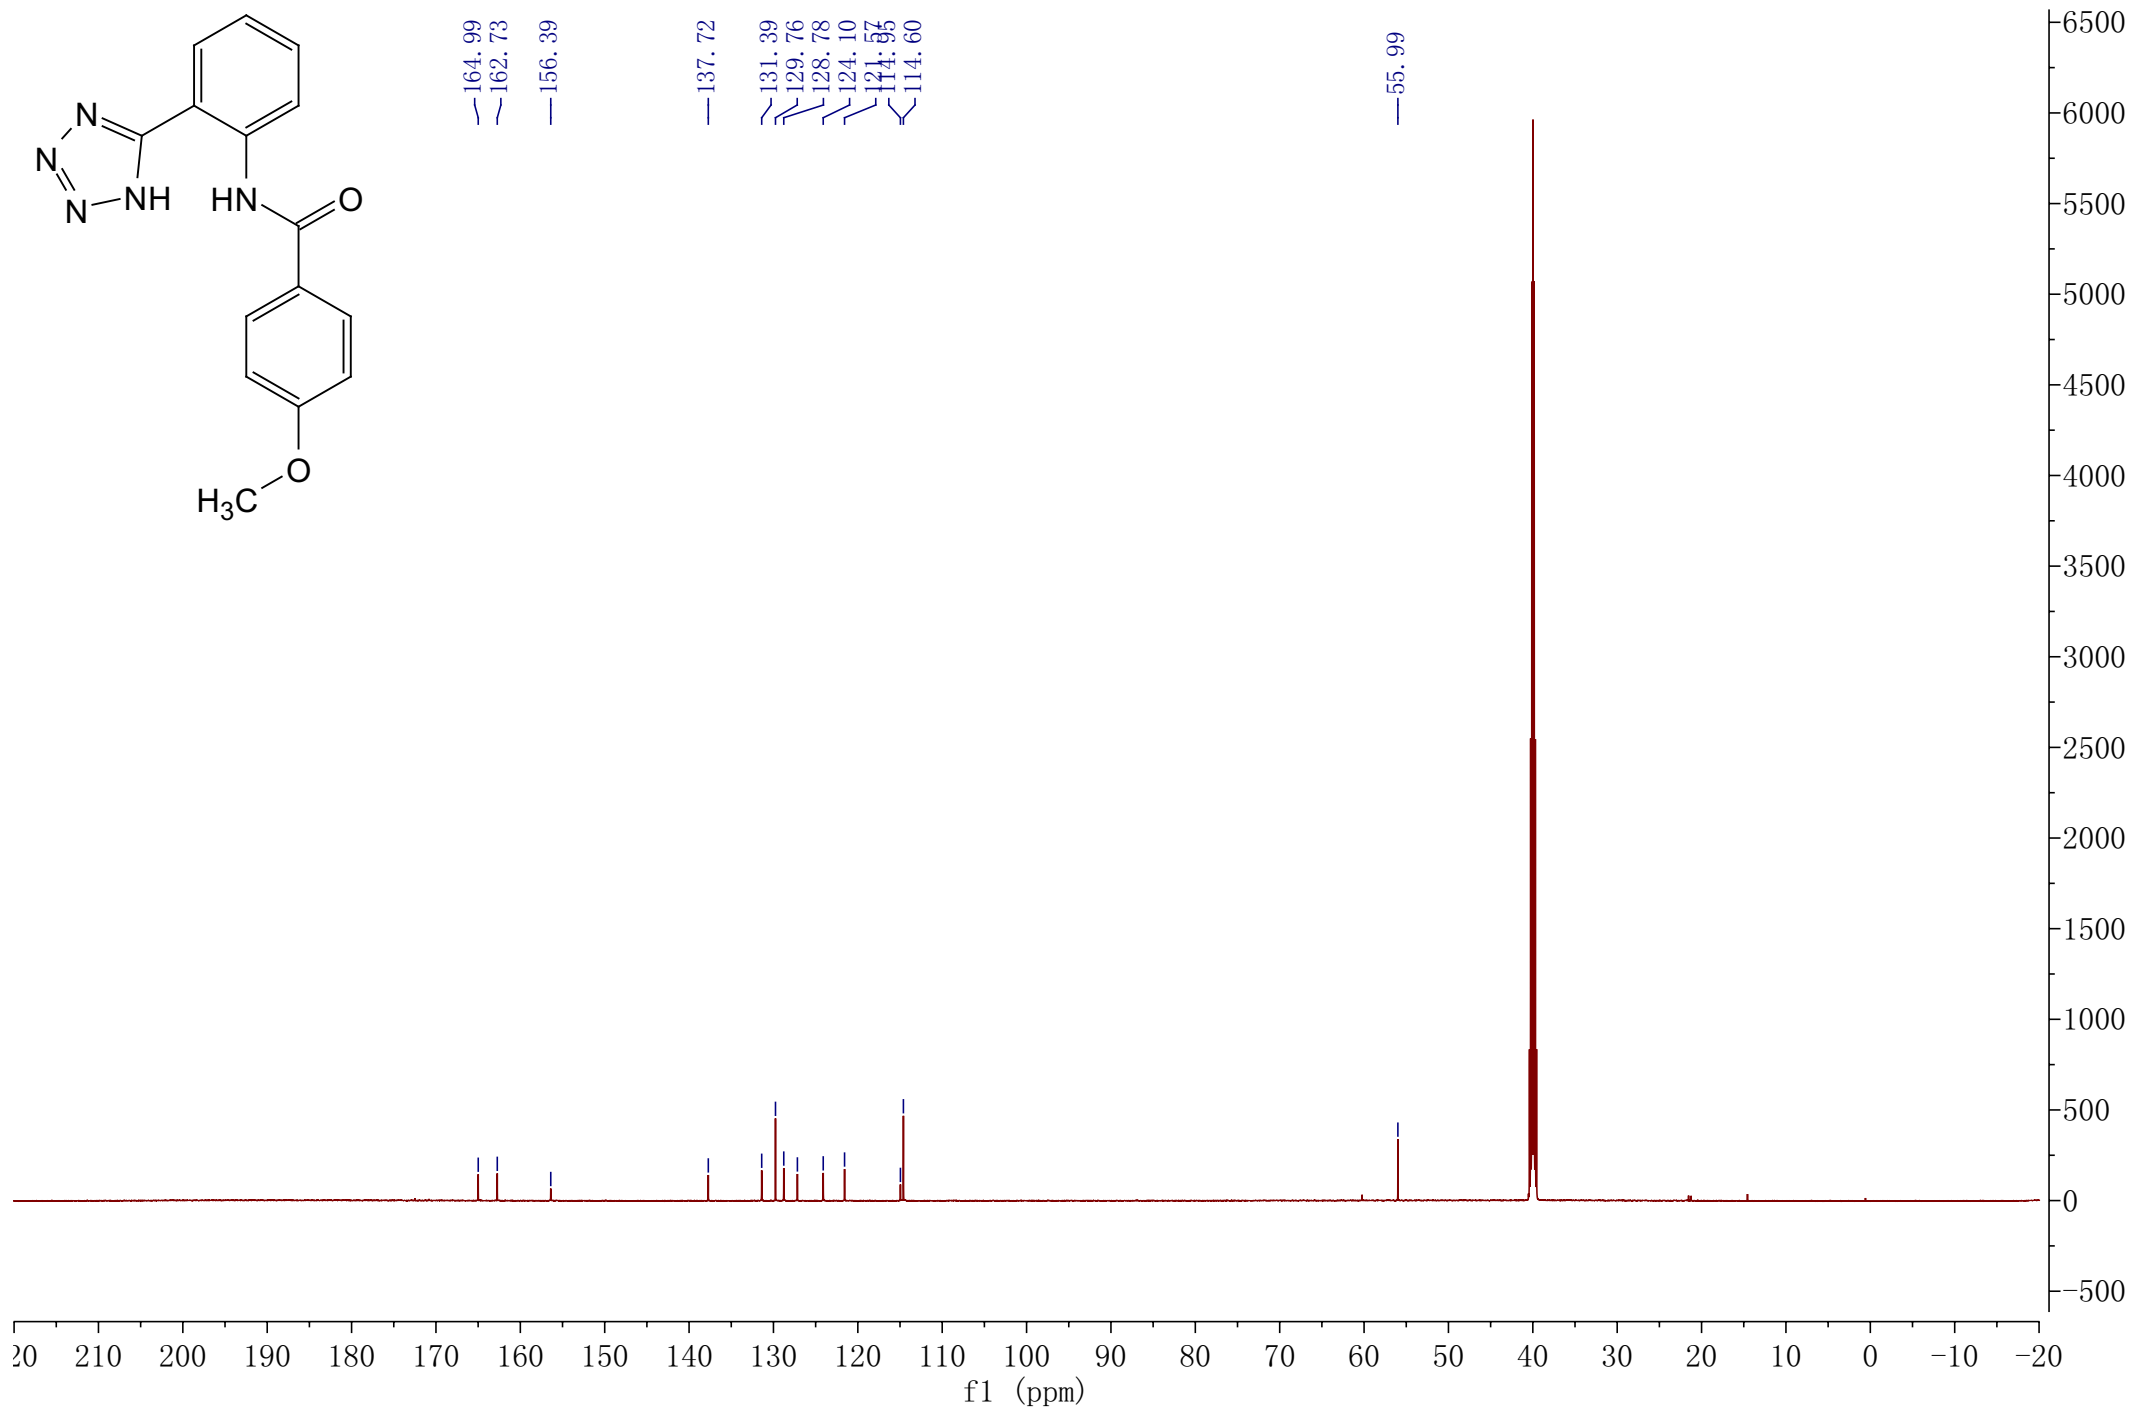

$^1\text{H}$  NMR (600 MHz, DMSO)  $\delta$  11.67 (s, 1H), 8.70 (d,  $J = 2.0$  Hz, 1H), 8.35 (s, 1H), 8.32 (d,  $J = 7.9$  Hz, 1H), 8.05 (d,  $J = 7.8$  Hz, 1H), 7.99 (d,  $J = 8.4$  Hz, 1H), 7.88 (t,  $J = 7.8$  Hz, 1H), 7.64 (dd,  $J = 8.4, 2.0$  Hz, 1H).

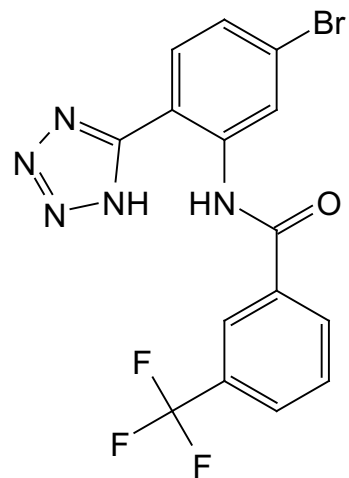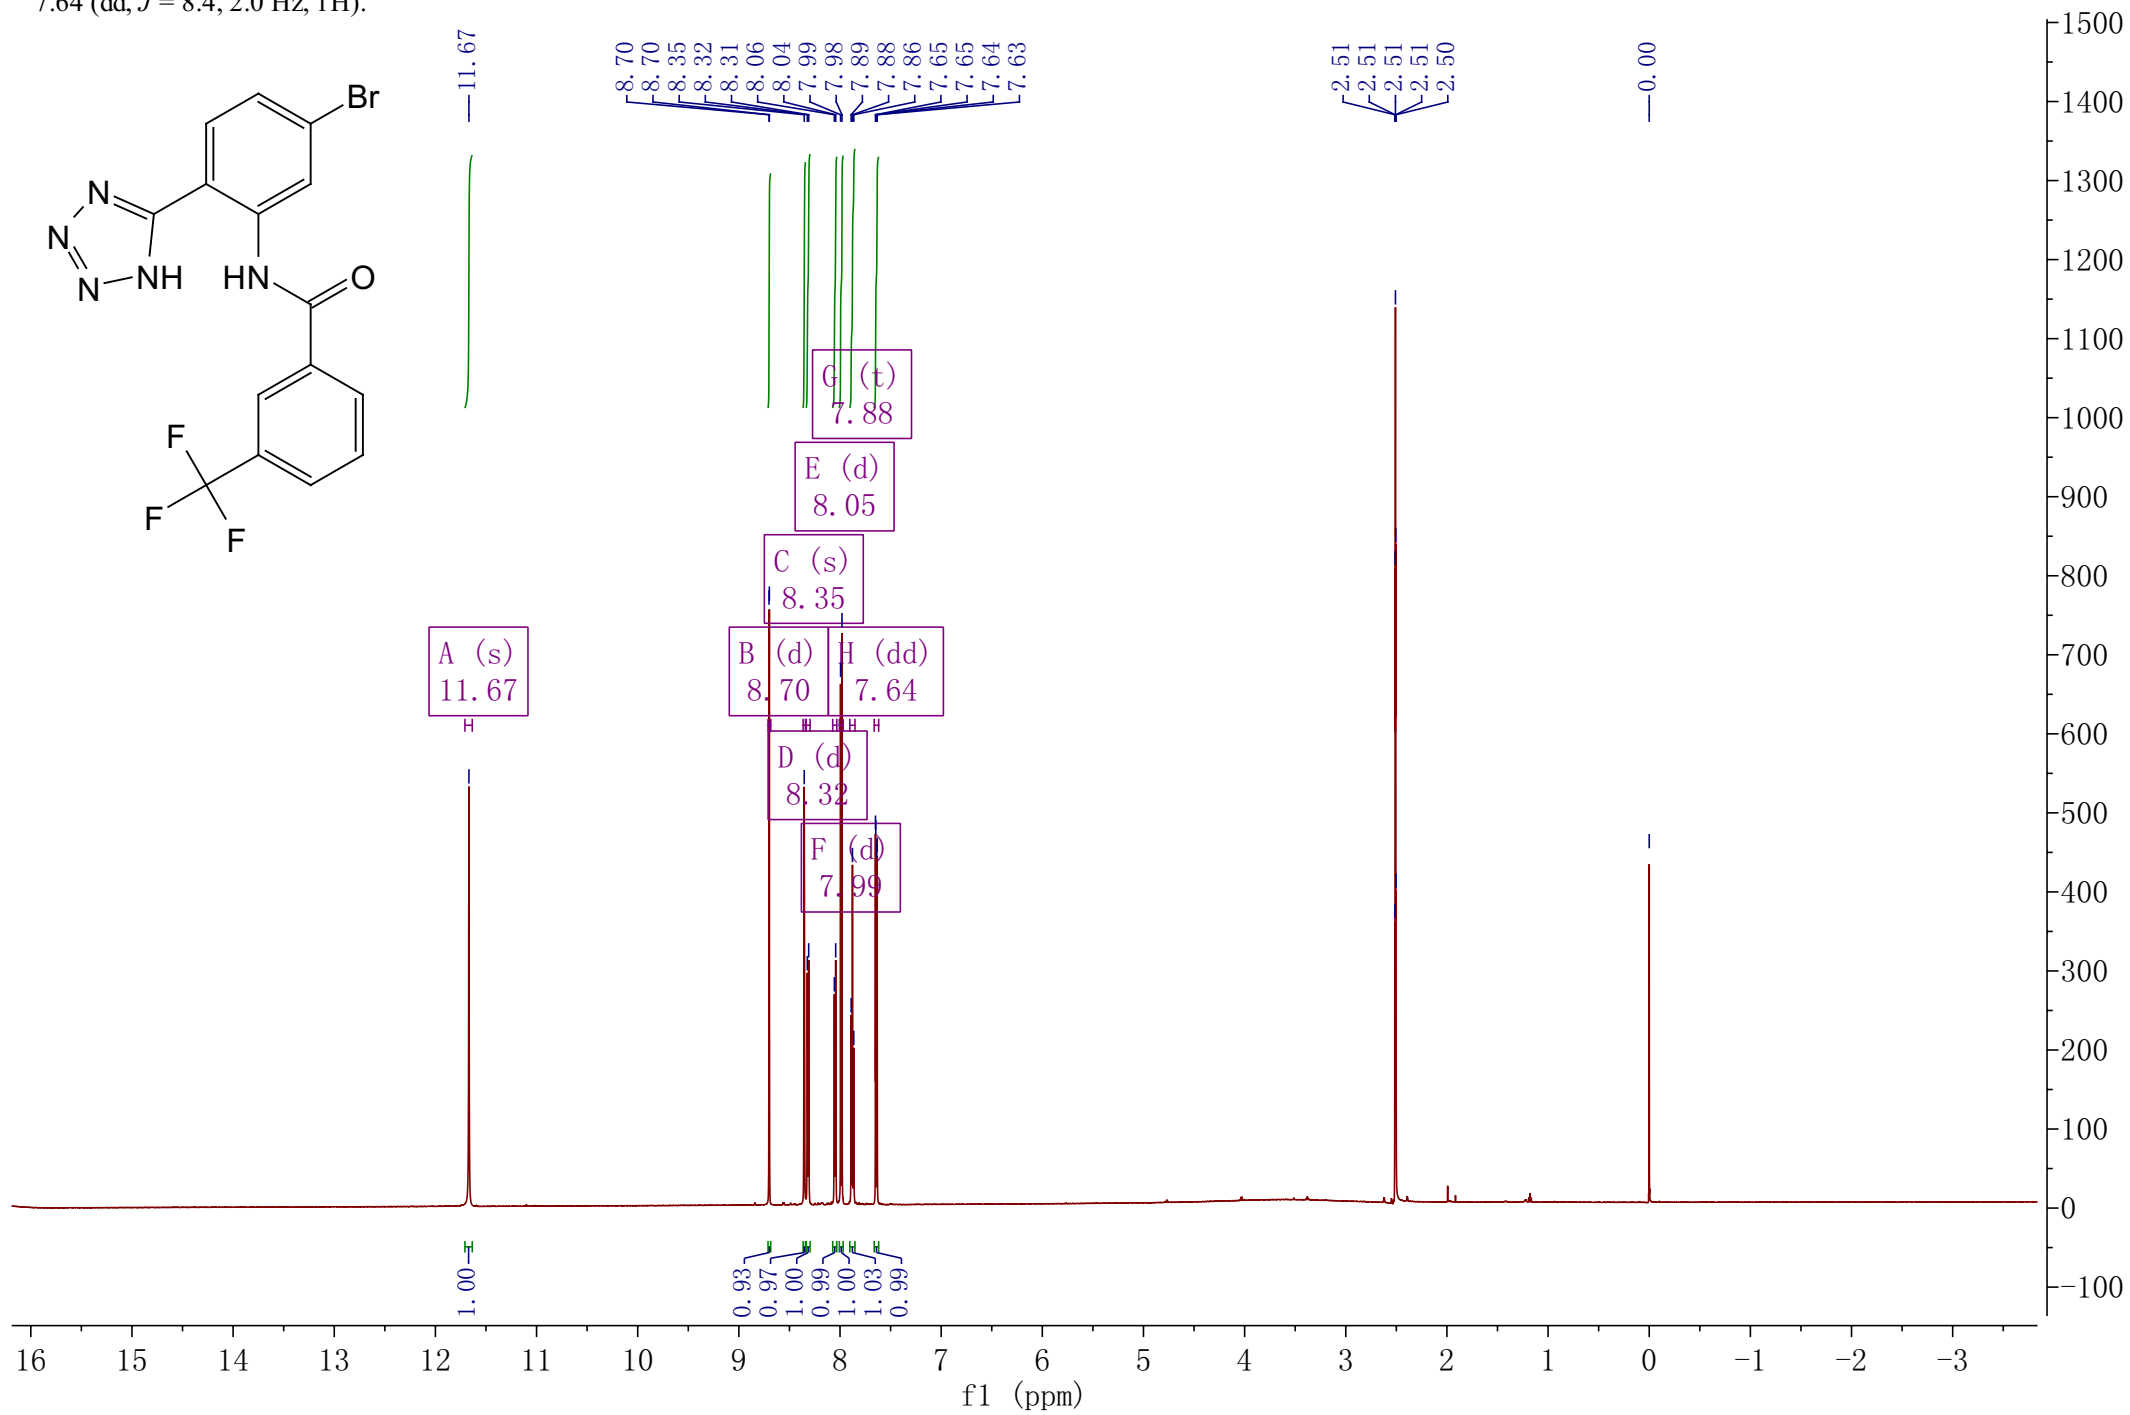

$^{13}\text{C}$  NMR (151 MHz, DMSO)  $\delta$  163.30 (s), 153.87 (s), 137.24 (s), 134.42 (s), 130.85 (s), 129.89 (s), 129.68 (s), 129.01 (q,  $J = 32.2$  Hz), 128.27 (d,  $J = 3.5$  Hz), 127.03 (s), 124.36 (s), 124.12 (d,  $J = 8.2$  Hz), 123.54 (d,  $J = 3.9$  Hz), 122.35 (s), 113.50 (s).

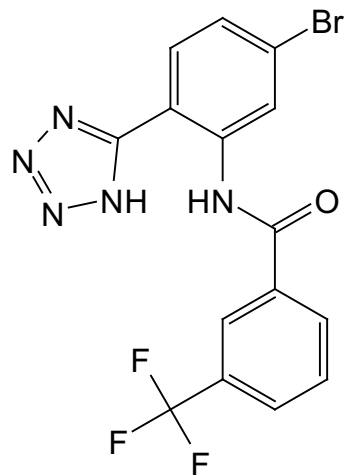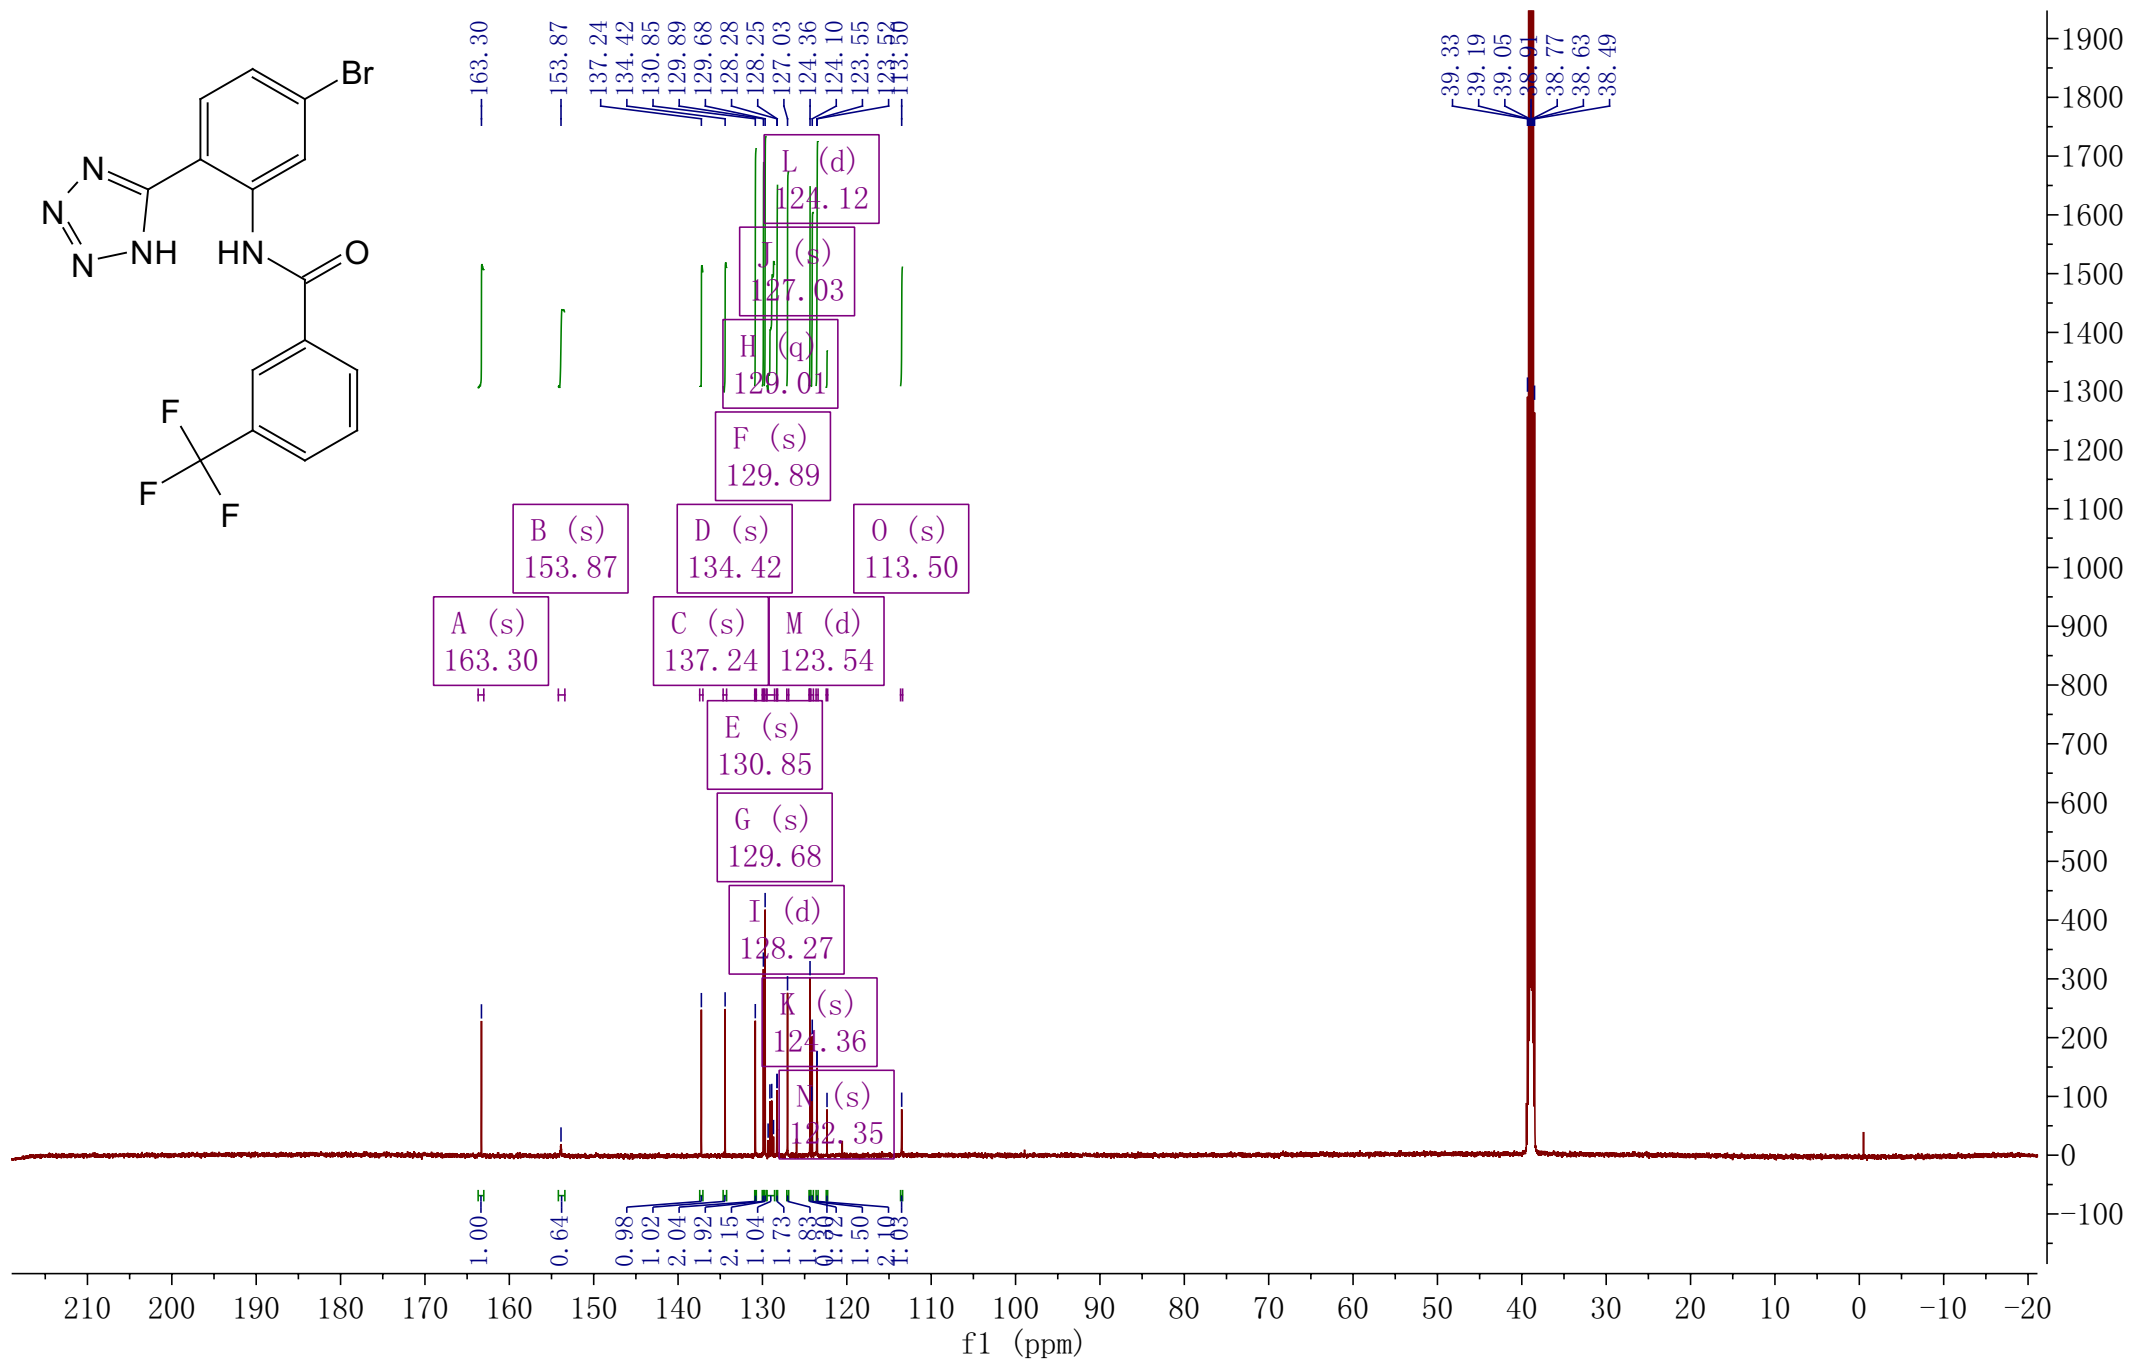

$^1\text{H}$  NMR (600 MHz, DMSO)  $\delta$  12.37 (s, 1H), 8.84 (d,  $J = 2.0$  Hz, 1H), 8.27 (d,  $J = 8.1$  Hz, 2H), 8.06 (d,  $J = 8.4$  Hz, 1H), 8.01 (d,  $J = 8.2$  Hz, 2H), 7.56 (dt,  $J = 8.4, 4.4$  Hz, 1H).

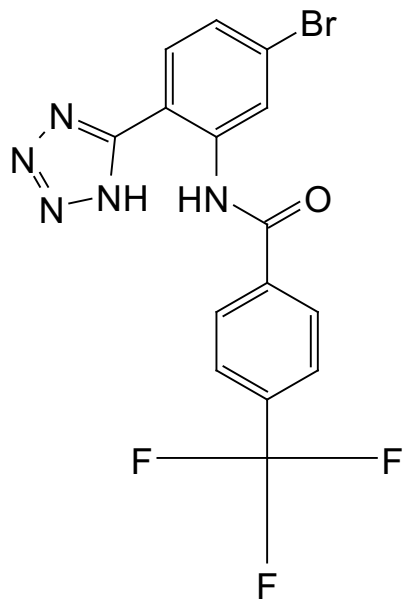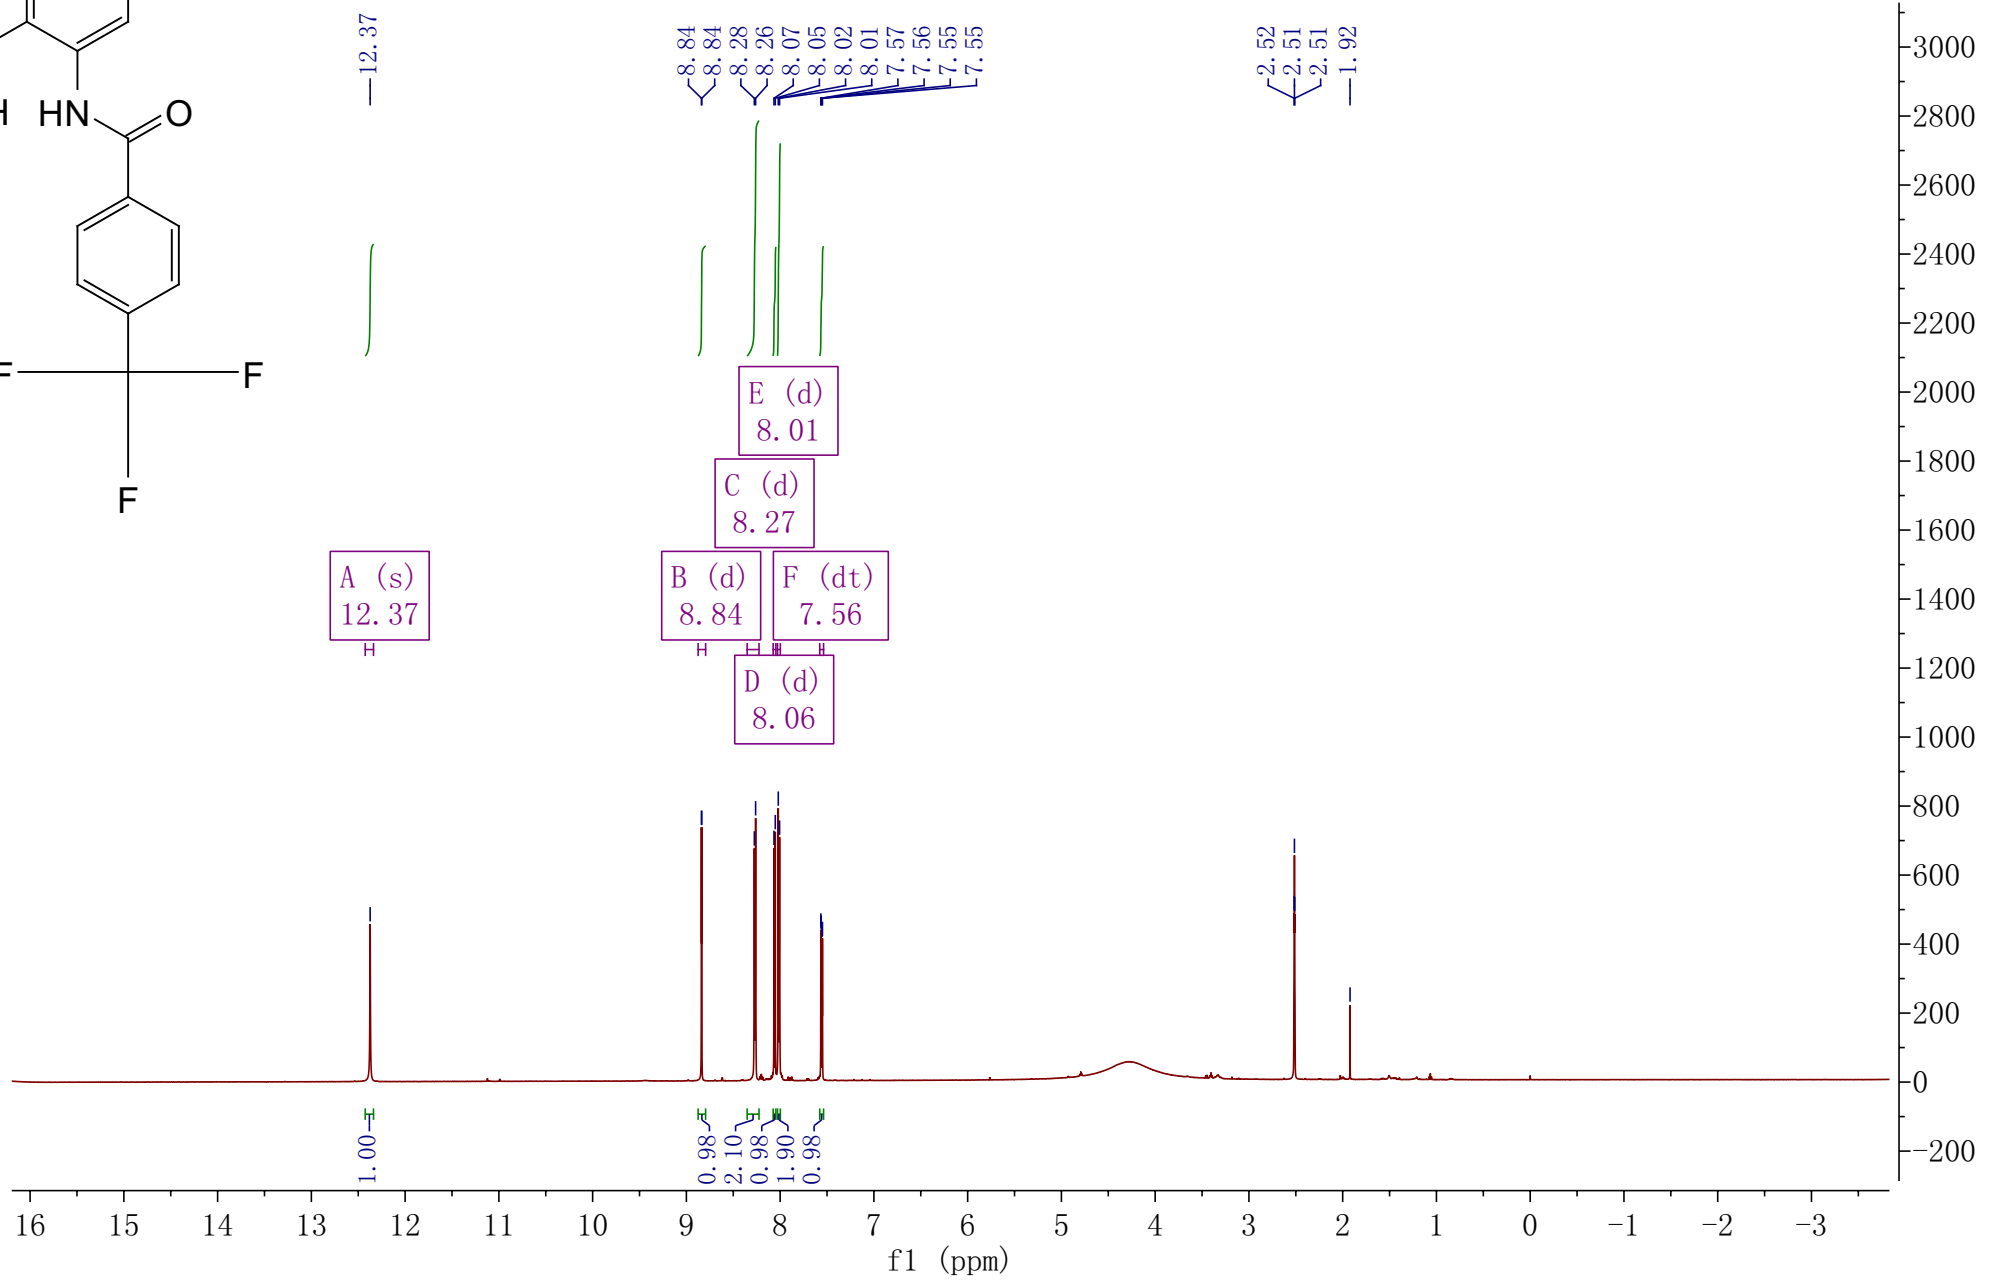

$^{13}\text{C}$  NMR (151 MHz, DMSO)  $\delta$  164.57 (s), 156.56 (s), 138.51 (s), 138.07 (s), 132.42 (q,  $J = 32.0$  Hz), 130.33 (s), 128.80 (s), 127.58 (s), 126.42 (q,  $J = 3.5$  Hz), 125.20 (s), 124.16 (s), 123.81 (s), 123.39 (s), 115.76 (s).

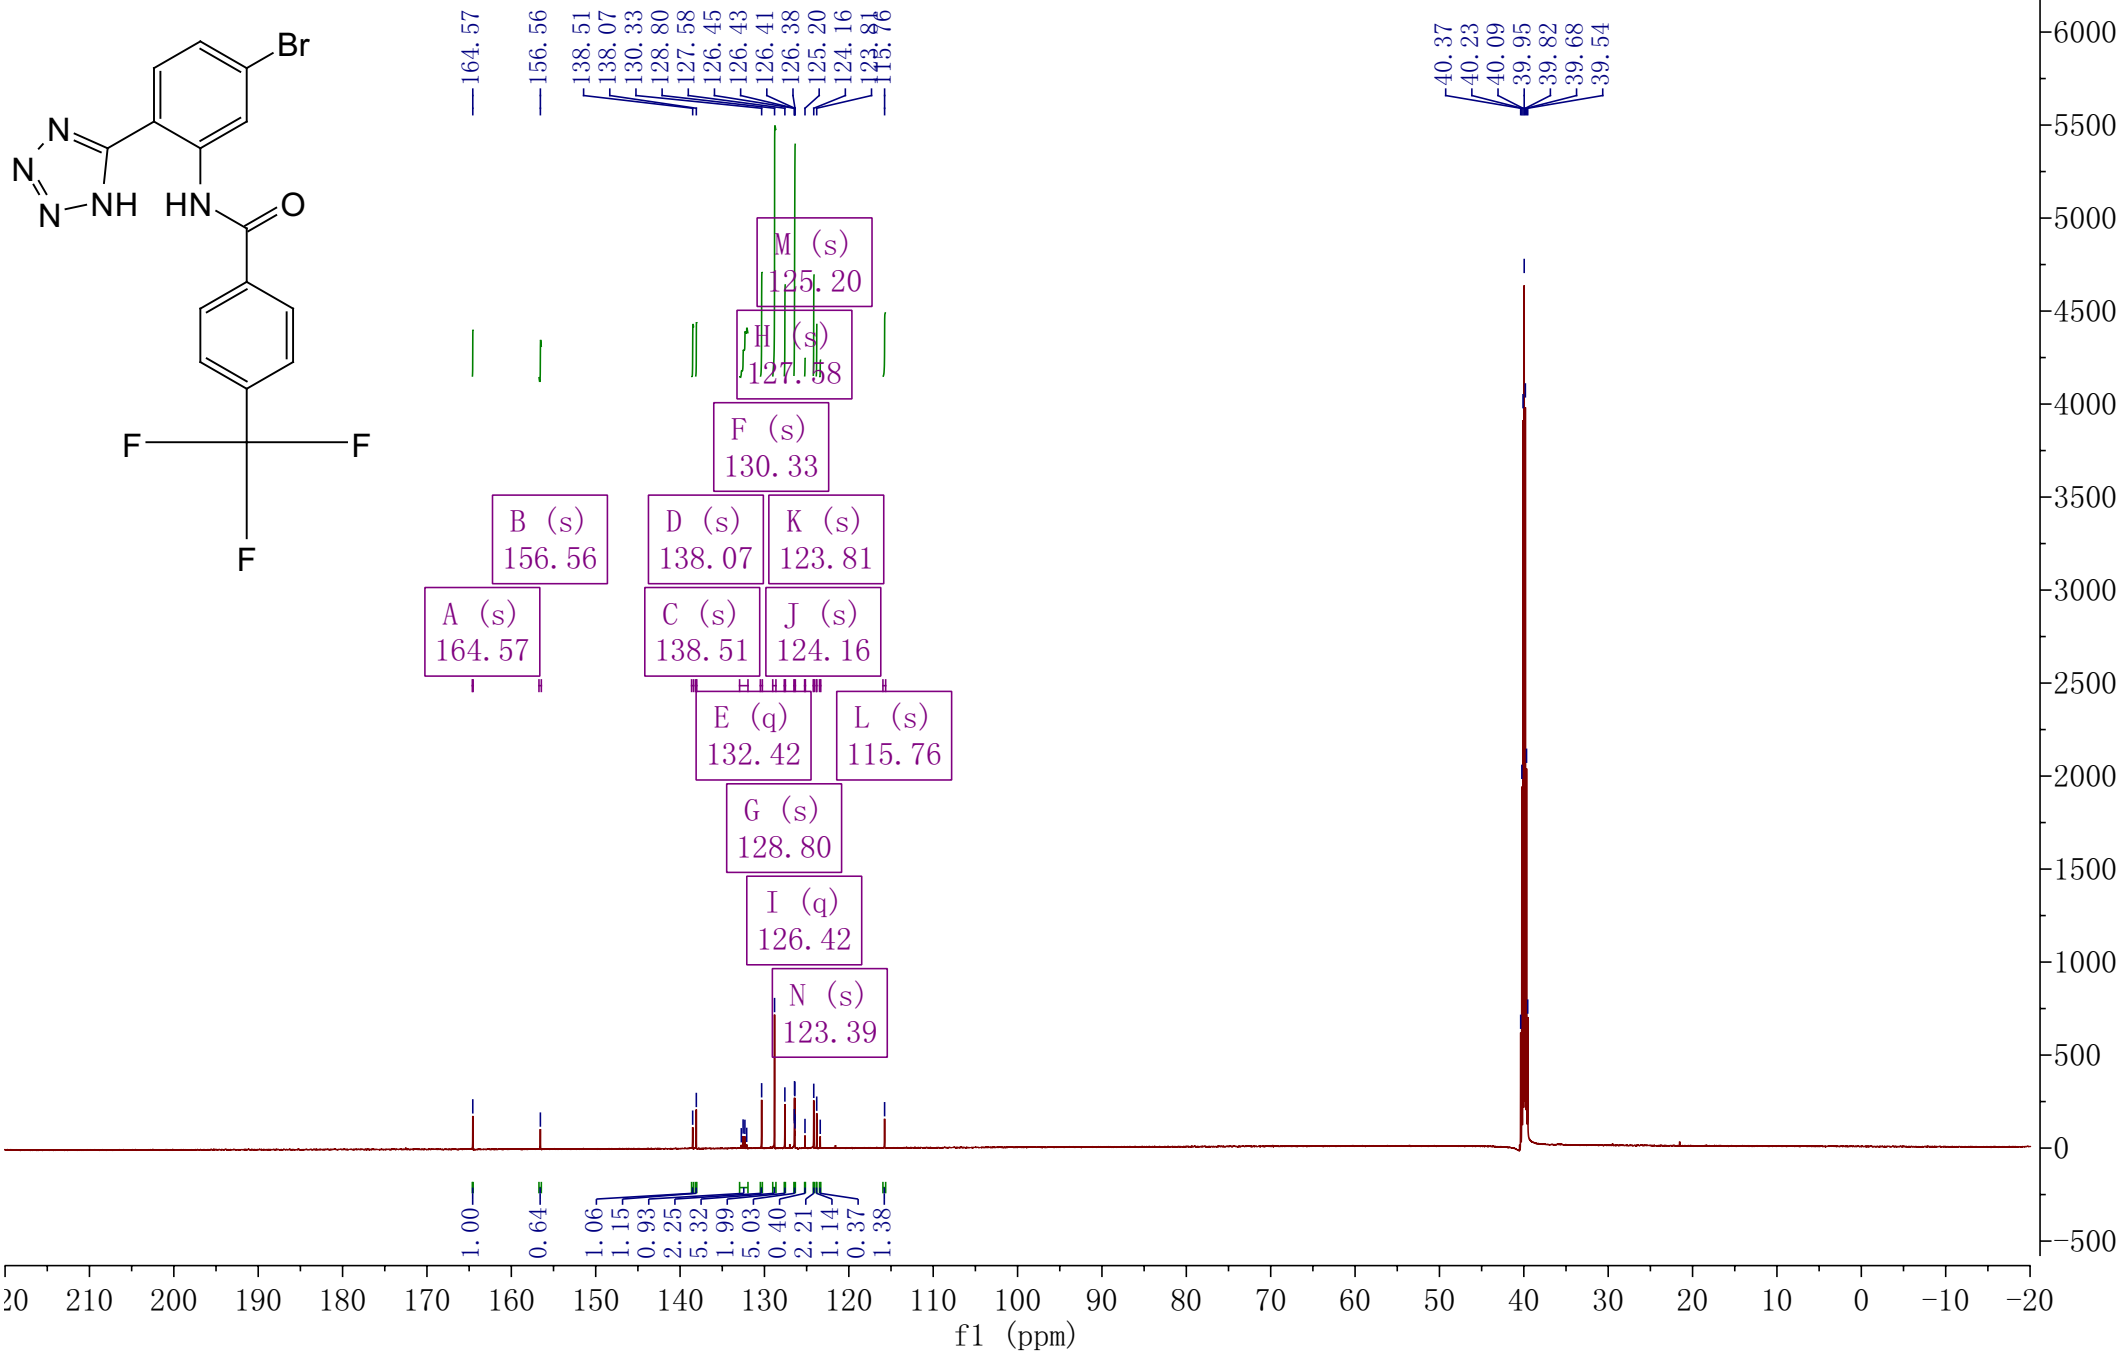

$^1\text{H}$  NMR (600 MHz, DMSO)  $\delta$  12.08 (s, 1H), 8.88 (d,  $J = 1.1$  Hz, 1H), 8.04 (d,  $J = 8.4$  Hz, 1H), 7.86 (dd,  $J = 15.7, 6.9$  Hz, 1H), 7.53 – 7.49 (m, 1H), 7.06 (d,  $J = 13.2$  Hz, 1H), 6.98 (dd,  $J = 8.9, 1.8$  Hz, 1H), 3.88 (s, 3H).

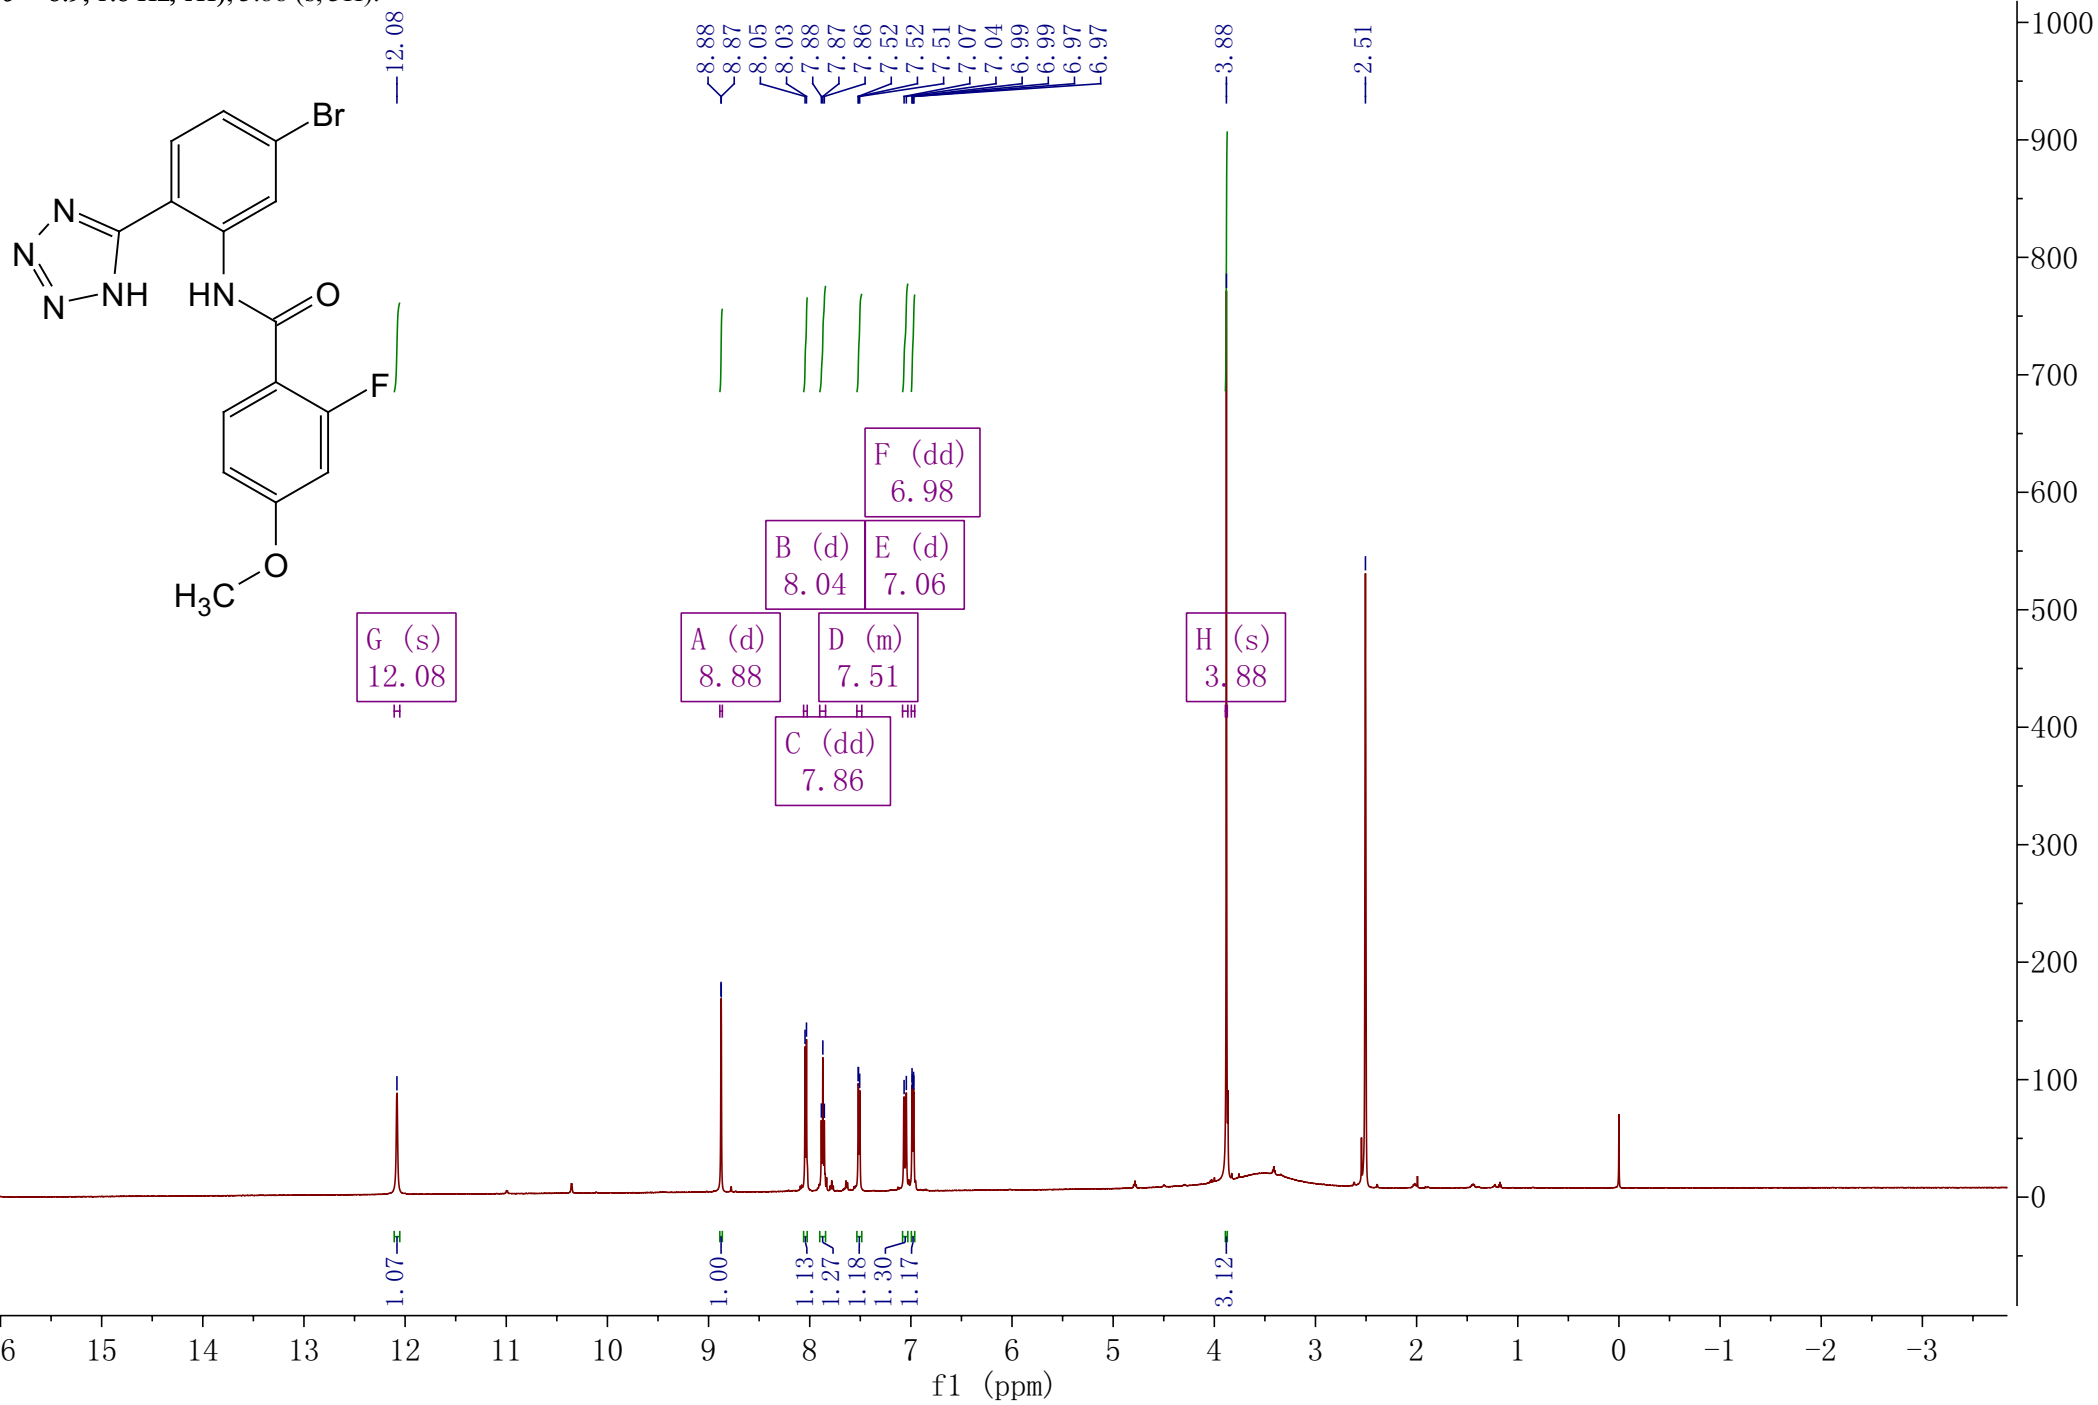

$^{13}\text{C}$  NMR (151 MHz, DMSO)  $\delta$  163.97 (d,  $J = 11.6$  Hz), 162.61 (s), 161.29 (d,  $J = 251.2$  Hz), 156.67 (s), 138.15 (s), 132.20 (d,  $J = 3.8$  Hz), 130.24 (s), 127.06 (s), 123.88 (s), 123.46 (s), 115.50 (s), 115.41 (d,  $J = 3.8$  Hz), 111.71 (d,  $J = 2.4$  Hz), 102.64 (d,  $J = 26.4$  Hz), 56.60 (s).

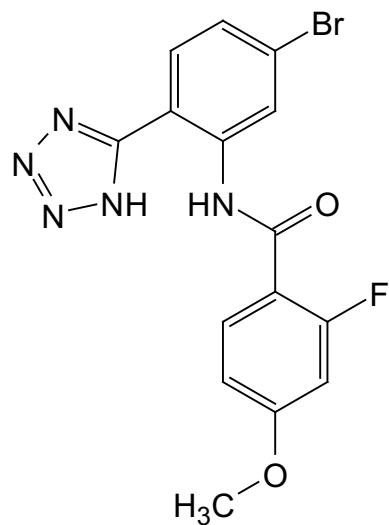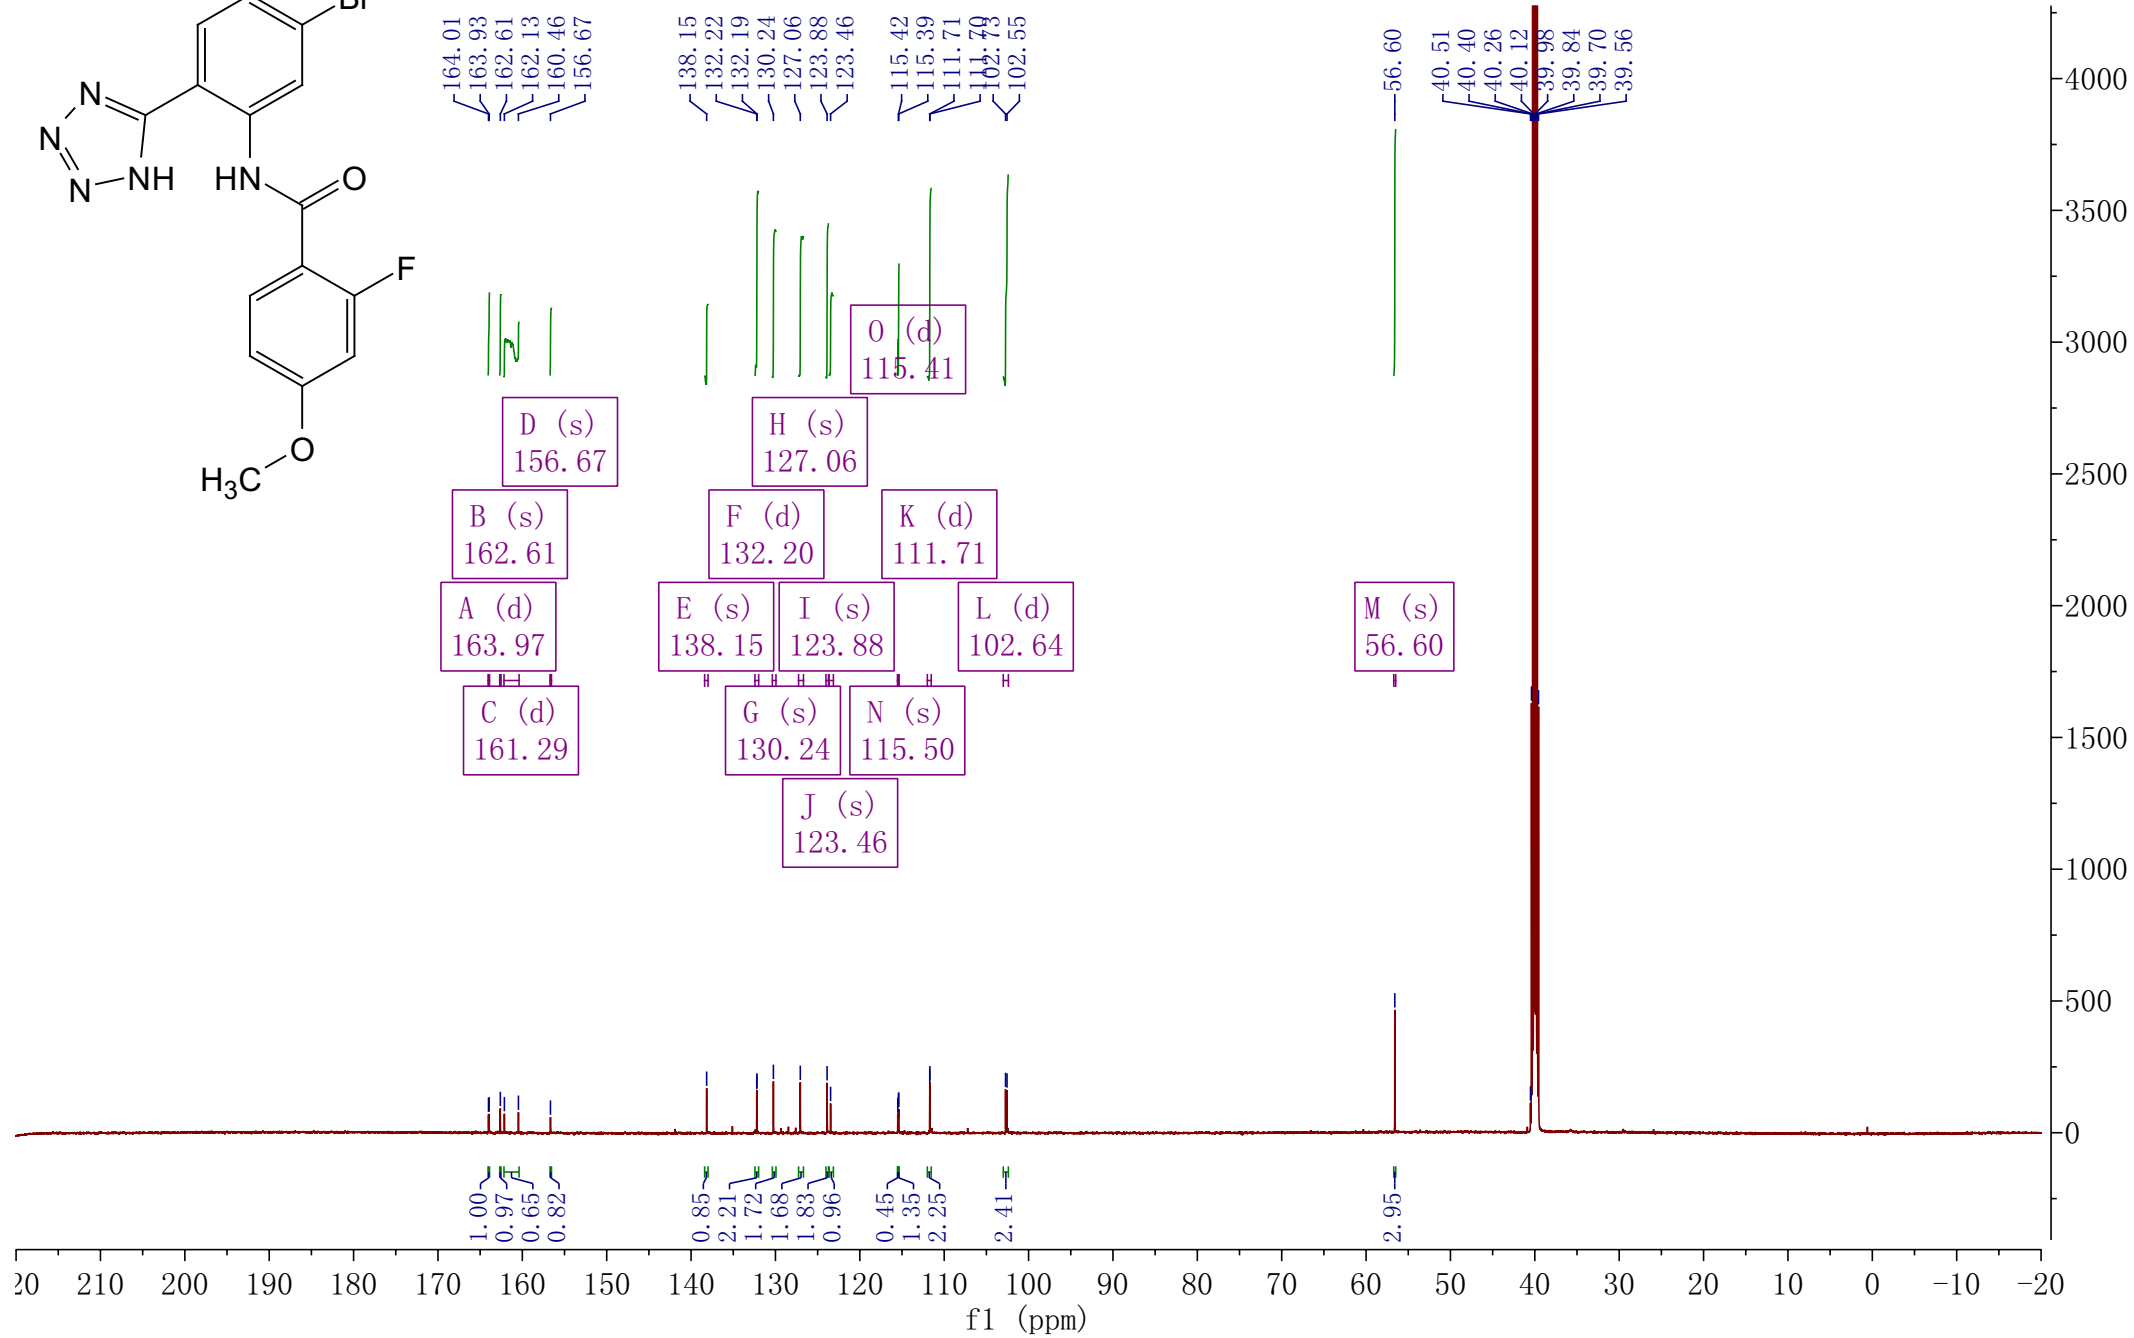



$^1\text{H}$  NMR (600 MHz, DMSO)  $\delta$  10.41 (s, 1H), 8.05 (s, 4H), 8.03 (d,  $J = 1.9$  Hz, 1H), 8.02 – 8.01 (m, 1H), 7.12 – 7.11 (m, 1H), 7.10 (d,  $J = 1.8$  Hz, 1H), 3.87 (s, 3H).

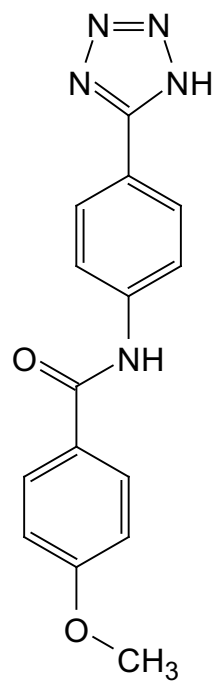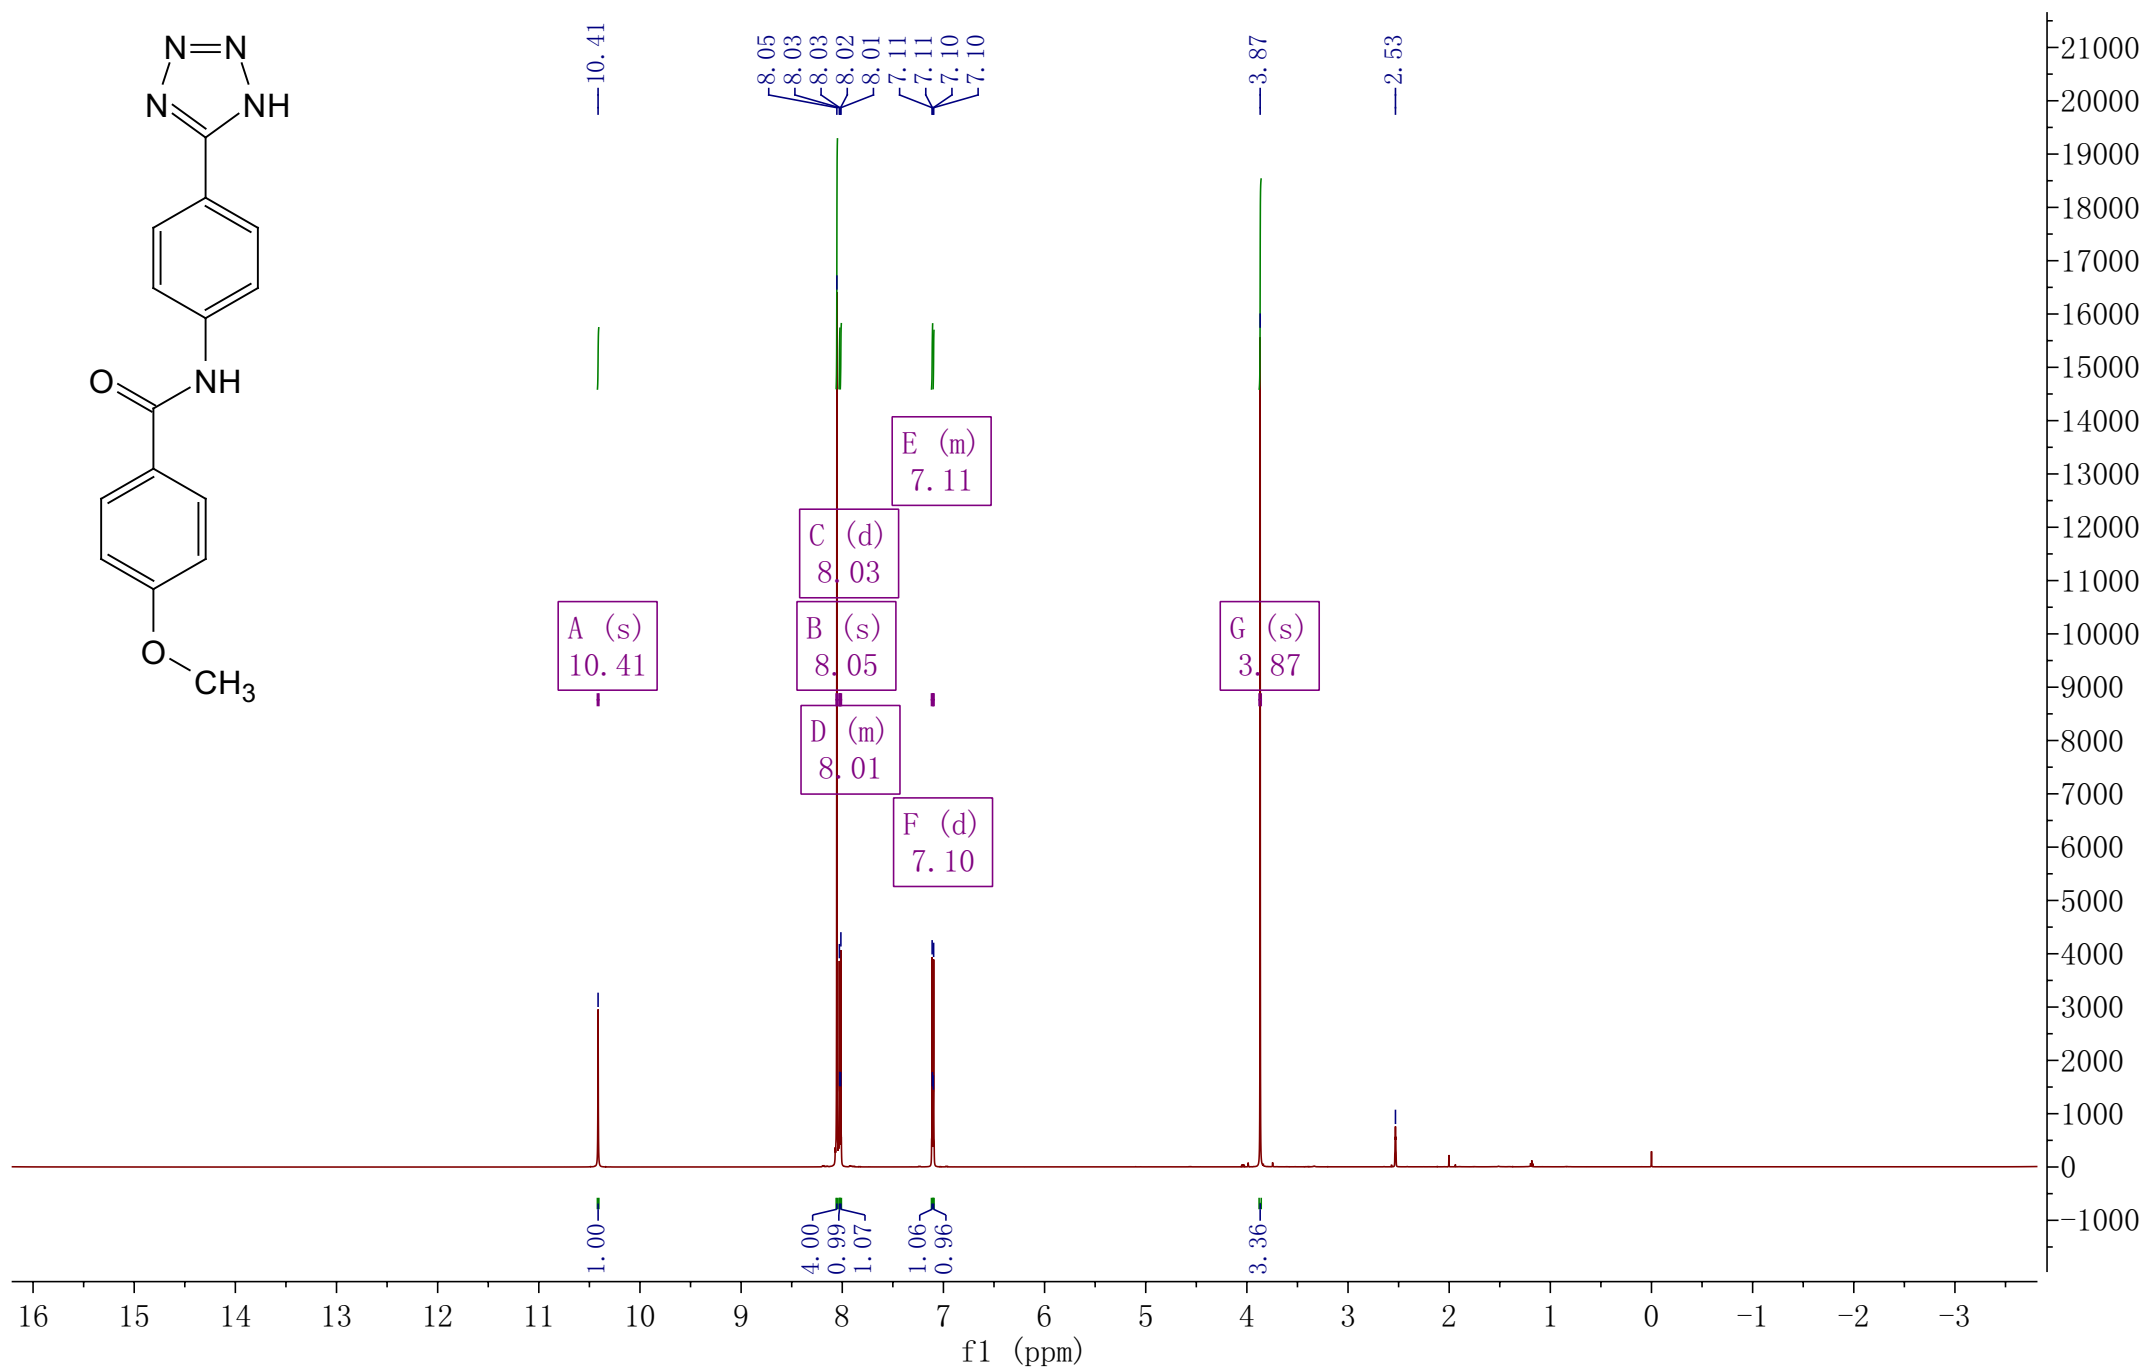

$^{13}\text{C}$  NMR (151 MHz, DMSO)  $\delta$  165.71, 162.59, 155.43, 142.50, 130.24, 128.02, 127.06, 120.91, 119.23, 114.13, 55.91, 40.36, 40.22, 40.08, 39.94, 39.81, 39.67, 39.53.

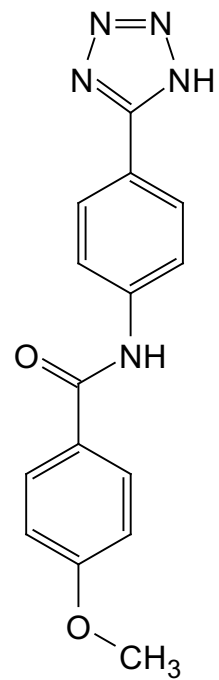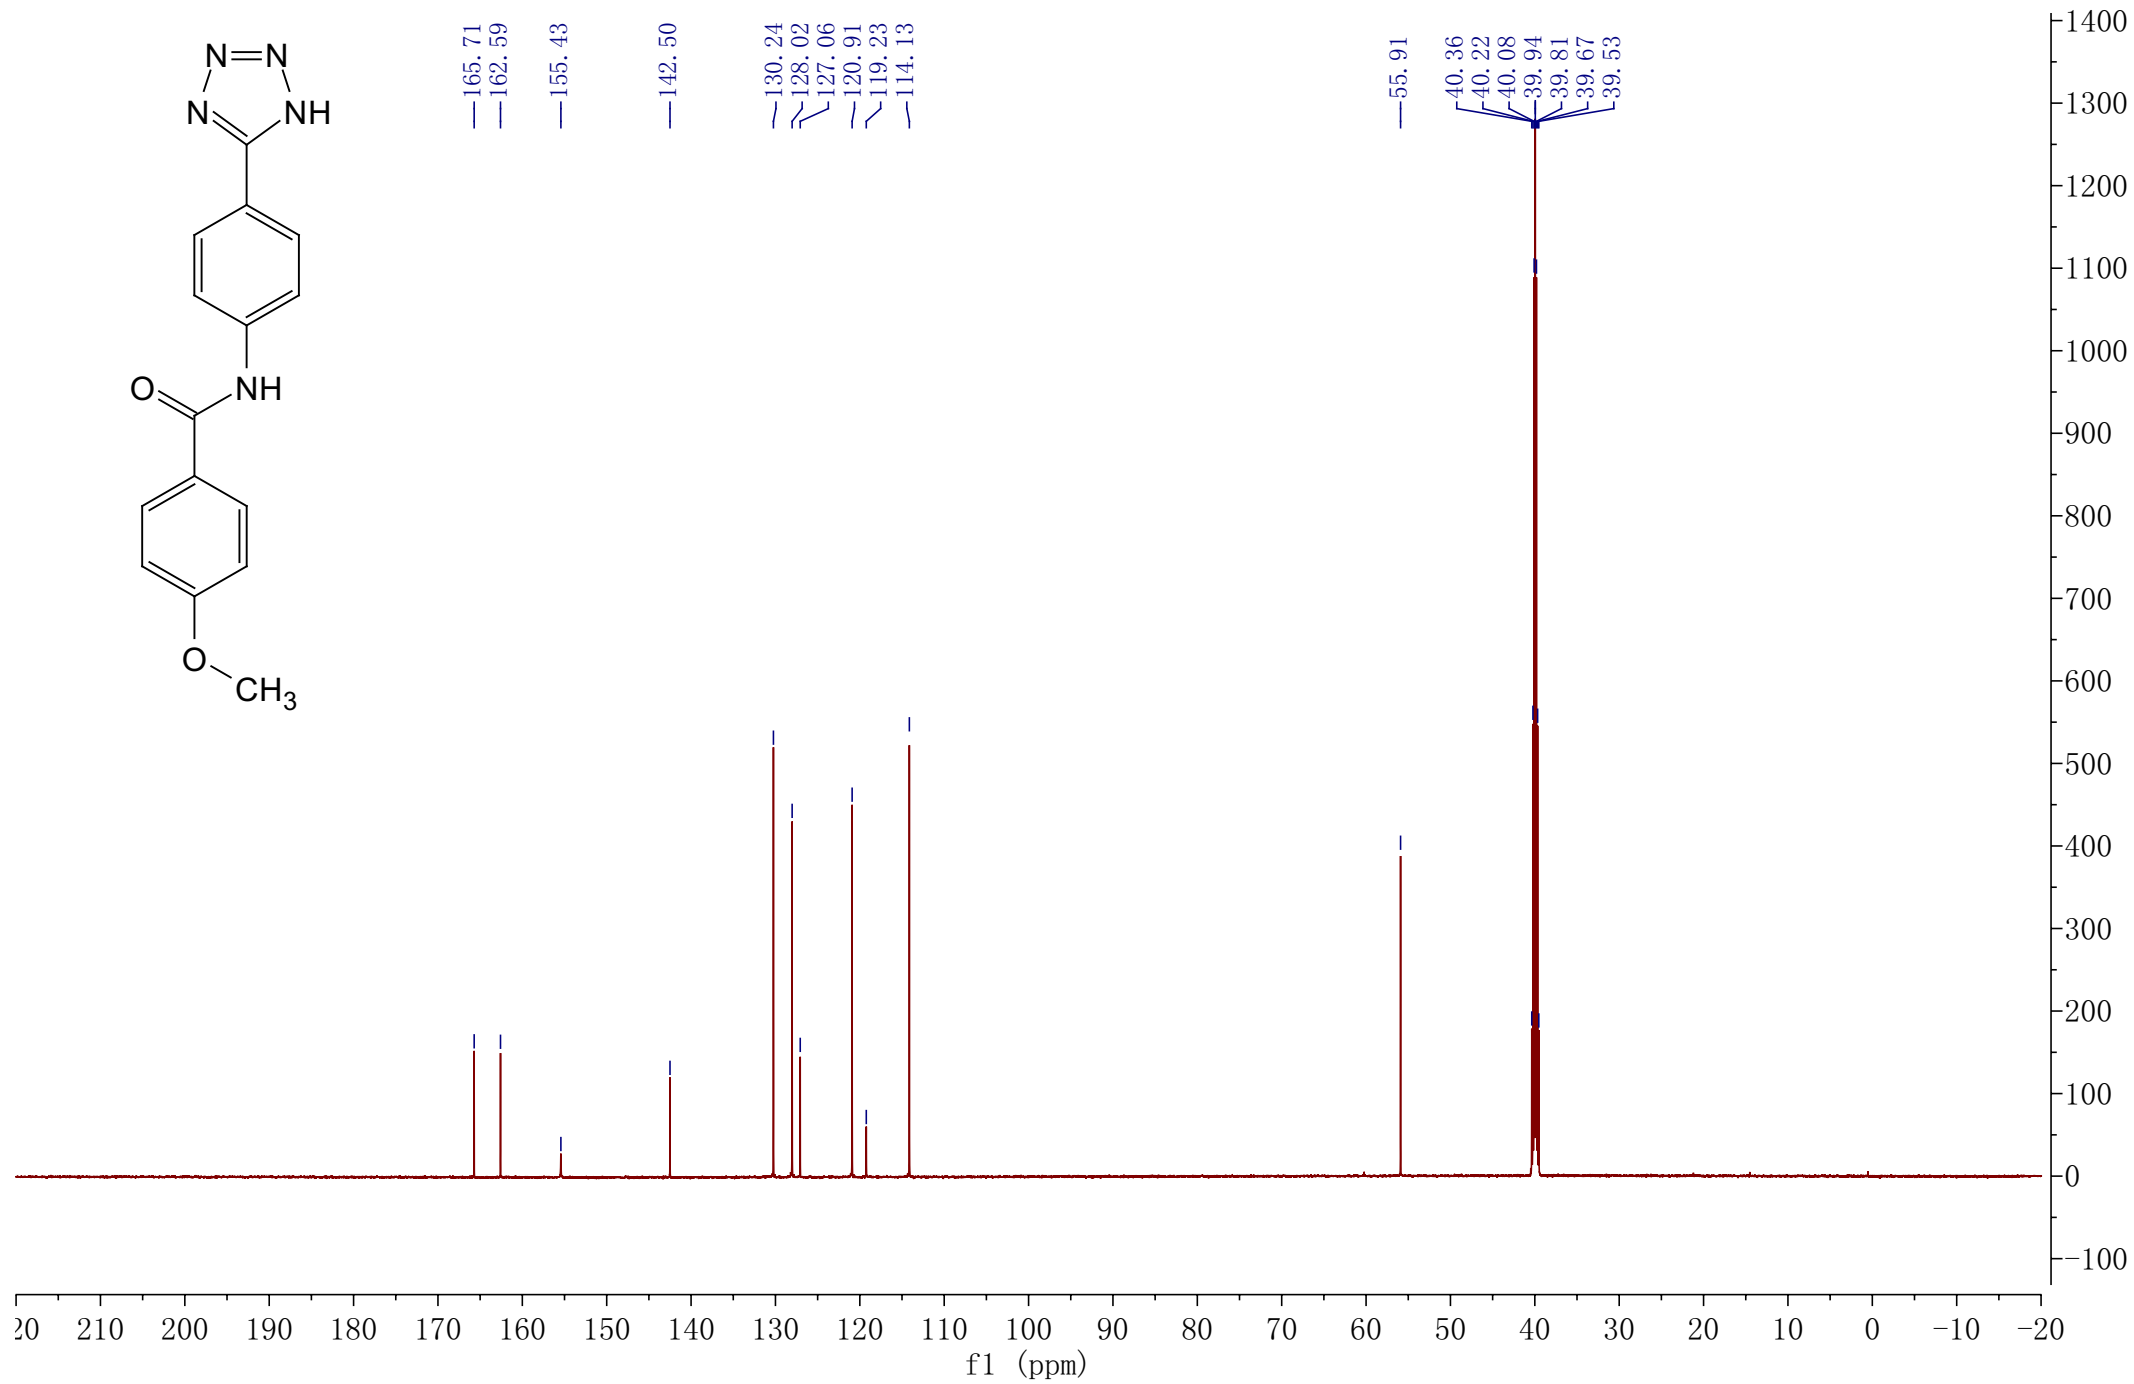

Supplement: ml7b00510_si_002.pdf [file ml7b00510_si_002.pdf]
